# Supplementary material for: Mutational signatures and chromosome alteration profiles of squamous cell carcinomas of the vulva
Source: PubMed Central journal article supplement — Exp Mol Med. 2018 Feb 9;50(2):e442–. doi: 10.1038/emm.2017.265 (PMC5903820; doi:10.1038/emm.2017.265), 2018-02-09
Supplement: emm2017265x1.pdf [file emm2017265x1.pdf]

**Supplementary Table S1. Description of whole-exome sequencing data in vulvar squamous cell carcinoma genomes.**

| <b>Sample ID*</b> | <b>Sequencing reads</b> | <b>Mapped reads</b> | <b>Mapped reads in exon (%)</b> | <b>Coverage (mean)**</b> | <b>Mean Mapping Quality</b> |
|-------------------|-------------------------|---------------------|---------------------------------|--------------------------|-----------------------------|
| VSCC2N            | 130,834,776             | 129,688,911         | 99.12%                          | 180.7329                 | 47.69                       |
| VSCC2T            | 121,141,616             | 119,802,560         | 98.89%                          | 166.4826                 | 47.67                       |
| VSCC1N            | 108,873,584             | 101,450,266         | 93.18%                          | 140.2559                 | 46.35                       |
| VSCC1T            | 102,543,765             | 91,979,413          | 89.70%                          | 119.6304                 | 45.78                       |
| VSCC9N            | 93,766,352              | 80,731,420          | 86.10%                          | 60.5536                  | 40.09                       |
| VSCC9T            | 107,734,327             | 90,196,340          | 83.72%                          | 90.5572                  | 35.48                       |
| VSCC10N           | 127,345,527             | 114,240,256         | 89.71%                          | 148.0099                 | 43.24                       |
| VSCC10T           | 96,559,938              | 85,446,937          | 88.49%                          | 110.5669                 | 39.3                        |
| VSCC11N           | 128,231,964             | 111,574,728         | 87.01%                          | 137.6878                 | 40.73                       |
| VSCC11T           | 132,135,454             | 120,286,201         | 91.03%                          | 155.7508                 | 43.61                       |
| VSCC3N            | 117,962,142             | 97,118,160          | 82.33%                          | 97.3511                  | 35.3                        |
| VSCC3T            | 127,746,697             | 113,322,995         | 88.71%                          | 150.9149                 | 44.38                       |
| VSCC12N           | 109,560,662             | 97,315,317          | 88.82%                          | 127.9513                 | 43.53                       |
| VSCC12T           | 110,950,660             | 102,932,866         | 92.77%                          | 141.8426                 | 45.37                       |
| VSCC4N            | 128,949,031             | 116,385,908         | 90.26%                          | 156.2992                 | 45.86                       |
| VSCC4T            | 111,682,700             | 103,617,846         | 92.78%                          | 142.5104                 | 45.19                       |
| VSCC13N           | 104,841,855             | 95,194,320          | 90.80%                          | 121.942                  | 45.47                       |
| VSCC13T           | 142,470,621             | 130,980,313         | 91.93%                          | 171.4168                 | 45.85                       |
| VSCC5N            | 130,010,952             | 124,138,090         | 95.48%                          | 170.2885                 | 46.79                       |
| VSCC5T            | 122,356,923             | 116,311,880         | 95.06%                          | 155.882                  | 46.62                       |
| VSCC6N            | 115,809,030             | 111,841,450         | 96.57%                          | 152.2072                 | 46.95                       |
| VSCC6T            | 130,244,281             | 120,012,509         | 92.14%                          | 157.5839                 | 46.11                       |
| VSCC7N            | 106,964,831             | 90,652,715          | 84.75%                          | 108.8077                 | 39                          |
| VSCC7T            | 105,362,712             | 89,847,664          | 85.27%                          | 110.4683                 | 39.3923                     |
| VSCC8N            | 106,648,097             | 86,871,175          | 81.46%                          | 94.6502                  | 36.846                      |
| VSCC8T            | 115,334,272             | 101,124,414         | 87.68%                          | 131.5968                 | 42.6215                     |

|         |             |            |        |          |         |
|---------|-------------|------------|--------|----------|---------|
| VSCC14N | 81,411,747  | 69,071,600 | 84.84% | 88.357   | 40.058  |
| VSCC14T | 97,631,598  | 88,638,870 | 90.79% | 109.144  | 40.5631 |
| VSCC15N | 74,068,074  | 71,076,491 | 95.96% | 95.4158  | 46.7404 |
| VSCC15T | 105,699,977 | 95,696,665 | 90.54% | 112.3625 | 45.7138 |

---

\* The vulvar cancer genome and matched normal genome are labeled with the use of characters 'T' and 'N', respectively.

\*\* The mean coverage was calculated onto the targeted regions (Agilent SureSelect Human All Exome V4).
