# Supplementary material for: Mutational signatures and chromosome alteration profiles of squamous cell carcinomas of the vulva
Source: PubMed Central journal article supplement — Exp Mol Med. 2018 Feb 9;50(2):e442–. doi: 10.1038/emm.2017.265 (PMC5903820; doi:10.1038/emm.2017.265), 2018-02-09
Supplement: emm2017265x2.pdf [file emm2017265x2.pdf]

**Supplementary Table S2. Somatic point mutations and indels identified across 15 vulvar squamous cell carcinoma genomes.**

| SampleID | Genomic position*        | Ref | Alt | Gene            | Amino acid change                            | Exonic function   | Cancer Gene Census** | COSMIC variant <sup>†</sup> |
|----------|--------------------------|-----|-----|-----------------|----------------------------------------------|-------------------|----------------------|-----------------------------|
| VSCC2    | chr1:39898288-39898288   | G   | A   | <i>MACF1</i>    | NM_012090:exon61:c.G11233A:p.E3745K          | Missense_Mutation |                      |                             |
| VSCC2    | chr1:43908176-43908176   | C   | T   | <i>SZT2</i>     | NM_015284:exon57:c.C7867T:p.R2623C           | Missense_Mutation |                      |                             |
| VSCC2    | chr1:60139745-60139745   | C   | A   | <i>FGGY</i>     | NM_001278224:exon8:c.C555A:p.S185S,FGGY      | Silent            |                      | COSM2237493                 |
| VSCC2    | chr1:79385891-79385891   | C   | A   | <i>ADGRL4</i>   | NM_022159:exon10:c.G1438T:p.G480W            | Missense_Mutation |                      |                             |
| VSCC2    | chr1:145578135-145578135 | G   | A   | <i>PIAS3</i>    | NM_006099:exon2:c.G98A:p.R33Q                | Missense_Mutation |                      |                             |
| VSCC2    | chr1:175066764-175066764 | C   | G   | <i>TNN</i>      | NM_022093:exon8:c.C1800G:p.V600V             | Silent            |                      |                             |
| VSCC2    | chr1:201180046-201180046 | G   | A   | <i>IGFN1</i>    | NM_001164586:exon12:c.G6025A:p.G2009S        | Missense_Mutation |                      |                             |
| VSCC2    | chr2:20463077-20463077   | T   | G   | <i>PUM2</i>     | NM_001282790:exon12:c.A1865C:p.D622A,PUM2    | Missense_Mutation |                      |                             |
| VSCC2    | chr2:88876196-88876196   | G   | A   | <i>EIF2AK3</i>  | NM_001313915:exon12:c.C1459T:p.R487X,EIF2AK3 | Nonsense_Mutation |                      |                             |
| VSCC2    | chr2:105472856-105472856 | C   | T   | <i>POU3F3</i>   | NM_006236:exon1:c.C888T:p.G296G              | Silent            |                      |                             |
| VSCC2    | chr2:128927933-128927933 | G   | A   | <i>UGGT1</i>    | NM_020120:exon27:c.G2993A:p.R998K            | Missense_Mutation |                      |                             |
| VSCC2    | chr2:132021766-132021766 | A   | C   | <i>POTEE</i>    | NM_001083538:exon15:c.A2738C:p.K913T         | Missense_Mutation |                      | COSM288401                  |
| VSCC2    | chr2:132021818-132021818 | G   | A   | <i>POTEE</i>    | NM_001083538:exon15:c.G2790A:p.A930A         | Silent            |                      |                             |
| VSCC2    | chr2:136566318-136566318 | G   | A   | <i>LCT</i>      | NM_002299:exon8:c.C3599T:p.T1200M            | Missense_Mutation |                      | COSM3116455                 |
| VSCC2    | chr2:202358575-202358575 | C   | G   | <i>ALS2CR11</i> | NM_001168221:exon15:c.G2489C:p.R830T         | Missense_Mutation |                      |                             |
| VSCC2    | chr2:210558052-210558052 | G   | A   | <i>MAP2</i>     | NM_002374:exon7:c.G1158A:p.E386E             | Silent            |                      |                             |

|       |                          |   |   |                |                                              |                   |             |
|-------|--------------------------|---|---|----------------|----------------------------------------------|-------------------|-------------|
| VSCC2 | chr2:219875545-219875545 | G | C | <i>CFAP65</i>  | NM_194302:exon25:c.C4131G:p.I1377M           | Missense_Mutation | COSM4493317 |
| VSCC2 | chr2:234854567-234854567 | A | G | <i>TRPM8</i>   | NM_024080:exon7:c.A767G:p.N256S              | Missense_Mutation |             |
| VSCC2 | chr3:4836862-4836862     | G | T | <i>ITPR1</i>   | NM_002222:exon49:c.G6733T:p.V2245F,ITPR1     | Missense_Mutation |             |
| VSCC2 | chr3:27346302-27346302   | G | A | <i>NEK10</i>   | NM_152534:exon13:c.C964T:p.P322S,NEK10       | Missense_Mutation |             |
| VSCC2 | chr3:51970483-51970483   | G | A | <i>RRP9</i>    | NM_004704:exon7:c.C606T:p.V202V              | Silent            |             |
| VSCC2 | chr3:51970486-51970486   | G | T | <i>RRP9</i>    | NM_004704:exon7:c.C603A:p.H201Q              | Missense_Mutation |             |
| VSCC2 | chr3:138037034-138037034 | C | T | <i>NME9</i>    | NM_178130:exon6:c.G157A:p.E53K               | Missense_Mutation | COSM204958  |
| VSCC2 | chr3:194167821-194167821 | G | C | <i>ATP13A3</i> | NM_024524:exon13:c.C1332G:p.I444M            | Missense_Mutation |             |
| VSCC2 | chr3:195102652-195102652 | T | C | <i>ACAP2</i>   | NM_012287:exon3:c.A211G:p.S71G               | Missense_Mutation |             |
| VSCC2 | chr4:115750971-115750971 | C | T | <i>NDST4</i>   | NM_022569:exon13:c.G2474A:p.R825Q            | Missense_Mutation | COSM5576861 |
| VSCC2 | chr4:187088179-187088179 | C | T | <i>FAM149A</i> | NM_001006655:exon11:c.C1222T:p.R408X,FAM149A | Nonsense_Mutation | COSM293126  |
| VSCC2 | chr5:13845071-13845071   | G | A | <i>DNAH5</i>   | NM_001369:exon32:c.C5146T:p.R1716W           | Missense_Mutation | COSM3609122 |
| VSCC2 | chr5:79950724-79950724   | G | C | <i>MSH3</i>    | NM_002439:exon1:c.G178C:p.A60P               | Missense_Mutation | COSM4160032 |
| VSCC2 | chr5:95152261-95152261   | C | G | <i>GLRX</i>    | NM_001118890:exon2:c.G277C:p.G93R,GLRX       | Missense_Mutation |             |
| VSCC2 | chr5:131008454-131008454 | G | A | <i>FNIP1</i>   | NM_001008738:exon13:c.C1599T:p.A533A,FNIP1   | Silent            |             |
| VSCC2 | chr5:140263477-140263477 | G | A | <i>PCDHA13</i> | NM_018904:exon1:c.G1624A:p.V542M,PCDHA13     | Missense_Mutation |             |
| VSCC2 | chr5:140580776-140580776 | G | C | <i>PCDHB11</i> | NM_018931:exon1:c.G1429C:p.D477H             | Missense_Mutation |             |
| VSCC2 | chr5:169469079-169469079 | C | A | <i>DOCK2</i>   | NM_004946:exon38:c.C3819A:p.H1273Q           | Missense_Mutation |             |

|       |                          |   |   |                |                                            |                   |
|-------|--------------------------|---|---|----------------|--------------------------------------------|-------------------|
| VSCC2 | chr6:66200518-66200518   | A | G | <i>EYS</i>     | NM_198283:exon4:c.T831C:p.S277S,EYS        | Silent            |
| VSCC2 | chr6:88366695-88366695   | C | A | <i>ORC3</i>    | NM_001197259:exon14:c.C1159A:p.Q387K,ORC3  | Missense_Mutation |
| VSCC2 | chr6:152711478-152711478 | G | A | <i>SYNE1</i>   | NM_033071:exon53:c.C8135T:p.T2712I,SYNE1   | Missense_Mutation |
| VSCC2 | chr6:167754719-167754719 | G | T | <i>TTLL2</i>   | NM_031949:exon3:c.G1331T:p.R444I           | Missense_Mutation |
| VSCC2 | chr7:31682956-31682956   | C | G | <i>CCDC129</i> | NM_194300:exon10:c.C1972G:p.Q658E,CCDC129  | Missense_Mutation |
| VSCC2 | chr7:47832275-47832275   | T | C | <i>PKD1L1</i>  | NM_138295:exon56:c.A8476G:p.R2826G         | Missense_Mutation |
| VSCC2 | chr7:113519312-113519312 | C | A | <i>PPP1R3A</i> | NM_002711:exon4:c.G1835T:p.G612V           | Missense_Mutation |
| VSCC2 | chr7:143091352-143091352 | C | T | <i>EPHA1</i>   | NM_005232:exon15:c.G2437A:p.G813R          | Missense_Mutation |
| VSCC2 | chr8:21986446-21986446   | C | T | <i>HR</i>      | NM_005144:exon2:c.G238A:p.G80S,HR          | Missense_Mutation |
| VSCC2 | chr8:37553602-37553602   | C | G | <i>ZNF703</i>  | NM_025069:exon1:c.C105G:p.L35L             | Silent            |
| VSCC2 | chr8:37630339-37630339   | C | A | <i>PROSC</i>   | NM_007198:exon5:c.C386A:p.S129Y            | Missense_Mutation |
| VSCC2 | chr8:38839176-38839176   | G | T | <i>HTRA4</i>   | NM_153692:exon6:c.G1004T:p.G335V           | Missense_Mutation |
| VSCC2 | chr8:67576962-67576962   | C | A | <i>VCPIP1</i>  | NM_025054:exon1:c.G2232T:p.R744S           | Missense_Mutation |
| VSCC2 | chr8:100796597-100796597 | G | A | <i>VPS13B</i>  | NM_017890:exon43:c.G7909A:p.D2637N,VPS13B  | Missense_Mutation |
| VSCC2 | chr8:113563045-113563045 | G | T | <i>CSMD3</i>   | NM_052900:exon26:c.C4107A:p.D1369E,CSMD3   | Missense_Mutation |
| VSCC2 | chr8:114186039-114186039 | T | G | <i>CSMD3</i>   | NM_052900:exon4:c.A621C:p.G207G,CSMD3      | Silent            |
| VSCC2 | chr8:133141710-133141710 | G | T | <i>KCNQ3</i>   | NM_001204824:exon15:c.C2058A:p.G686G,KCNQ3 | Silent            |
| VSCC2 | chr8:144943521-144943521 | C | T | <i>EPPK1</i>   | NM_031308:exon2:c.G3901A:p.E1301K          | Missense_Mutation |

|       |                           |   |   |                |                                             |                   |             |
|-------|---------------------------|---|---|----------------|---------------------------------------------|-------------------|-------------|
| VSCC2 | chr9:116999266-116999266  | C | T | <i>COL27A1</i> | NM_032888:exon18:c.C2625T:p.S875S           | Silent            |             |
| VSCC2 | chr9:131196802-131196802  | C | T | <i>CERCAM</i>  | NM_001286760:exon11:c.C1211T:p.A404V,CERCAM | Missense_Mutation |             |
| VSCC2 | chr9:134385770-134385770  | A | G | <i>POMT1</i>   | NM_001136114:exon7:c.A472G:p.I158V,POMT1    | Missense_Mutation |             |
| VSCC2 | chr10:79769647-79769647   | C | T | <i>POLR3A</i>  | NM_007055:exon13:c.G1745A:p.R582H           | Missense_Mutation |             |
| VSCC2 | chr10:91066510-91066510   | C | T | <i>IFIT2</i>   | NM_001547:exon2:c.C797T:p.A266V             | Missense_Mutation | COSM921252  |
| VSCC2 | chr10:128952118-128952118 | A | G | <i>FAM196A</i> | NM_001039762:exon5:c.T1254C:p.Y418Y         | Silent            |             |
| VSCC2 | chr11:637488-637488       | G | A | <i>DRD4</i>    | NM_000797:exon1:c.G184A:p.E62K              | Missense_Mutation |             |
| VSCC2 | chr11:862623-862623       | C | G | <i>TSPAN4</i>  | NM_001025238:exon3:c.C137G:p.S46C,TSPAN4    | Missense_Mutation | COSM4838149 |
| VSCC2 | chr11:2187265-2187265     | C | A | <i>TH</i>      | NM_000360:exon10:c.G1071T:p.G357G,TH        | Silent            |             |
| VSCC2 | chr11:2187266-2187266     | C | A | <i>TH</i>      | NM_000360:exon10:c.G1070T:p.G357V,TH        | Missense_Mutation |             |
| VSCC2 | chr11:7079545-7079545     | G | A | <i>NLRP14</i>  | NM_176822:exon8:c.G2497A:p.E833K            | Missense_Mutation | COSM1298568 |
| VSCC2 | chr11:55563506-55563506   | T | C | <i>OR5D14</i>  | NM_001004735:exon1:c.T475C:p.L159L          | Silent            |             |
| VSCC2 | chr11:55798727-55798727   | A | C | <i>OR5AS1</i>  | NM_001001921:exon1:c.A833C:p.Y278S          | Missense_Mutation |             |
| VSCC2 | chr11:62288377-62288377   | A | G | <i>AHNAK</i>   | NM_001620:exon5:c.T13512C:p.G4504G          | Silent            |             |
| VSCC2 | chr11:78423628-78423628   | G | C | <i>TENM4</i>   | NM_001098816:exon26:c.C3953G:p.S1318C       | Missense_Mutation |             |
| VSCC2 | chr11:96124092-96124092   | A | C | <i>JRKL</i>    | NM_003772:exon1:c.A279C:p.K93N,JRKL         | Missense_Mutation |             |
| VSCC2 | chr11:104820439-104820439 | G | C | <i>CASP4</i>   | NM_001225:exon5:c.C612G:p.F204L,CASP4       | Missense_Mutation |             |
| VSCC2 | chr11:117870158-117870158 | G | T | <i>IL10RA</i>  | NM_001558:exon7:c.G1539T:p.T513T            | Silent            |             |

|       |                           |   |   |                 |                                                |                       |             |
|-------|---------------------------|---|---|-----------------|------------------------------------------------|-----------------------|-------------|
| VSCC2 | chr11:118250463-118250463 | C | T | <i>UBE4A</i>    | NM_001204077:exon11:c.C1874<br>T:p.P625L,UBE4A | Missense_M<br>utation |             |
| VSCC2 | chr12:109186283-109186283 | G | T | <i>SSH1</i>     | NM_001161331:exon13:c.C1705<br>A:p.Q569K,SSH1  | Missense_M<br>utation |             |
| VSCC2 | chr12:109877485-109877485 | G | A | <i>MYO1H</i>    | NM_001101421:exon23:c.G2296<br>A:p.E766K       | Missense_M<br>utation |             |
| VSCC2 | chr12:112681561-112681561 | G | A | <i>HECTD4</i>   | NM_001109662:exon31:c.C4252<br>T:p.R1418C      | Missense_M<br>utation |             |
| VSCC2 | chr12:125834832-125834832 | C | T | <i>TMEM132B</i> | NM_052907:exon2:c.C887T:p.T2<br>96M            | Missense_M<br>utation | COSM1359971 |
| VSCC2 | chr12:129558630-129558630 | C | A | <i>TMEM132D</i> | NM_133448:exon9:c.G3090T:p.<br>Q1030H          | Missense_M<br>utation |             |
| VSCC2 | chr14:30100070-30100070   | T | C | <i>PRKD1</i>    | NM_002742:exon10:c.A1550G:p.<br>N517S          | Missense_M<br>utation |             |
| VSCC2 | chr14:74823625-74823625   | C | T | <i>VRTN</i>     | NM_018228:exon2:c.C139T:p.R4<br>7W             | Missense_M<br>utation |             |
| VSCC2 | chr14:74824184-74824184   | G | A | <i>VRTN</i>     | NM_018228:exon2:c.G698A:p.R<br>233H            | Missense_M<br>utation |             |
| VSCC2 | chr14:95669610-95669610   | G | A | <i>CLMN</i>     | NM_024734:exon9:c.C2076T:p.S<br>692S           | Silent                |             |
| VSCC2 | chr14:100406417-100406417 | G | C | <i>EML1</i>     | NM_004434:exon22:c.G2416C:p.<br>D806H,EML1     | Missense_M<br>utation |             |
| VSCC2 | chr15:43784537-43784537   | C | T | <i>TP53BP1</i>  | NM_001141979:exon2:c.G137A:<br>p.S46N,TP53BP1  | Missense_M<br>utation |             |
| VSCC2 | chr15:73562384-73562384   | C | T | <i>NEO1</i>     | NM_001172623:exon17:c.C2528<br>T:p.A843V,NEO1  | Missense_M<br>utation |             |
| VSCC2 | chr15:101112254-101112254 | G | A | <i>LINS1</i>    | NM_001040616:exon6:c.C1239T<br>:p.F413F        | Silent                |             |
| VSCC2 | chr16:23494245-23494245   | G | A | <i>GGA2</i>     | NM_015044:exon9:c.C879T:p.L2<br>93L            | Silent                |             |
| VSCC2 | chr16:57828979-57828979   | G | A | <i>KIFC3</i>    | NM_001130100:exon3:c.C247T:<br>p.Q83X,KIFC3    | Nonsense_<br>Mutation |             |
| VSCC2 | chr16:88501108-88501108   | C | A | <i>ZNF469</i>   | NM_001127464:exon2:c.C7146A<br>:p.A2382A       | Silent                | COSM3818166 |
| VSCC2 | chr17:10368006-10368006   | G | T | <i>MYH4</i>     | NM_017533:exon6:c.C525A:p.I1<br>75I            | Silent                |             |

|       |                         |   |   |                      |                                             |                   |             |
|-------|-------------------------|---|---|----------------------|---------------------------------------------|-------------------|-------------|
| VSCC2 | chr17:11520795-11520795 | G | C | <i>DNAH9</i>         | NM_001372:exon5:c.G972C:p.E324D             | Missense_Mutation |             |
| VSCC2 | chr17:21318801-21318801 | G | A | <i>KCNJ12,KCNJ18</i> | NM_001194958:exon3:c.G147A:p.K49K,KCNJ12    | Silent            |             |
| VSCC2 | chr17:34842557-34842557 | A | G | <i>ZNHIT3</i>        | NM_001281432:exon1:c.A14G:p.K5R,ZNHIT3      | Missense_Mutation |             |
| VSCC2 | chr17:48472323-48472323 | C | G | <i>LRRC59</i>        | NM_018509:exon2:c.G132C:p.L44L              | Silent            |             |
| VSCC2 | chr17:56584673-56584673 | G | A | <i>MTMR4</i>         | NM_004687:exon9:c.C673T:p.R225C             | Missense_Mutation |             |
| VSCC2 | chr17:57134296-57134296 | C | T | <i>TRIM37</i>        | NM_001005207:exon13:c.G1139A:p.R380H,TRIM37 | Missense_Mutation | COSM981896  |
| VSCC2 | chr17:60813788-60813788 | G | A | <i>MARCH10</i>       | NM_001100875:exon6:c.C1441T:p.L481L,MARCH10 | Silent            |             |
| VSCC2 | chr18:346930-346930     | C | T | <i>COLEC12</i>       | NM_130386:exon5:c.G692A:p.S231N             | Missense_Mutation |             |
| VSCC2 | chr18:627372-627372     | T | G | <i>CLUL1</i>         | NM_014410:exon5:c.T699G:p.S233S,CLUL1       | Silent            | COSM988277  |
| VSCC2 | chr18:8785985-8785985   | G | A | <i>MTCL1</i>         | NM_015210:exon7:c.G1783A:p.E595K            | Missense_Mutation |             |
| VSCC2 | chr18:19378103-19378103 | A | C | <i>MIB1</i>          | NM_020774:exon8:c.A1151C:p.E384A            | Missense_Mutation |             |
| VSCC2 | chr18:66721273-66721273 | G | T | <i>CCDC102B</i>      | NM_024781:exon8:c.G1441T:p.D481Y,CCDC102B   | Missense_Mutation |             |
| VSCC2 | chr19:36530289-36530289 | C | T | <i>THAP8</i>         | NM_152658:exon3:c.G608A:p.R203Q             | Missense_Mutation |             |
| VSCC2 | chr19:36558822-36558822 | G | T | <i>WDR62</i>         | NM_001083961:exon7:c.G792T:p.R264R,WDR62    | Silent            |             |
| VSCC2 | chr19:46001857-46001857 | C | G | <i>PPMIN</i>         | NM_001080401:exon1:c.C127G:p.R43G           | Missense_Mutation |             |
| VSCC2 | chr19:52856964-52856964 | C | T | <i>ZNF610</i>        | NM_001161425:exon4:c.C93T:p.I31I,ZNF610     | Silent            | COSM5045737 |
| VSCC2 | chr19:57967623-57967623 | G | A | <i>VNIR1</i>         | NM_020633:exon1:c.C232T:p.H78Y              | Missense_Mutation | COSM81958   |
| VSCC2 | chr19:58773355-58773355 | G | C | <i>ZNF544</i>        | NM_014480:exon7:c.G1383C:p.E461D            | Missense_Mutation |             |

|       |                           |                     |                     |                 |                                                               |                   |              |
|-------|---------------------------|---------------------|---------------------|-----------------|---------------------------------------------------------------|-------------------|--------------|
| VSCC2 | chr20:13280000-13280000   | G                   | A                   | <i>ISM1</i>     | NM_080826:exon6:c.G1289A:p.W430X                              | Nonsense_Mutation |              |
| VSCC2 | chr20:18576731-18576731   | C                   | T                   | <i>DTD1</i>     | NM_080820:exon3:c.C216T:p.Y72Y                                | Silent            |              |
| VSCC2 | chr20:62303959-62303959   | C                   | A                   | <i>RTEL1</i>    | NM_001283010:exon8:c.C81A:p.D27E,RTEL1                        | Missense_Mutation |              |
| VSCC2 | chr21:47412667-47412667   | C                   | A                   | <i>COL6A1</i>   | NM_001848:exon19:c.C1278A:p.G426G                             | Silent            |              |
| VSCC2 | chr22:38823593-38823593   | G                   | A                   | <i>KCNJ4</i>    | NM_004981:exon2:c.C545T:p.A182V,KCNJ4                         | Missense_Mutation |              |
| VSCC2 | chr22:39262713-39262713   | G                   | C                   | <i>CBX6</i>     | NM_001303494:exon5:c.C686G:p.P229R,CBX6                       | Missense_Mutation |              |
| VSCC2 | chr22:44495948-44495948   | G                   | A                   | <i>PARVB</i>    | NM_001243385:exon3:c.G107A:p.R36H,PARVB                       | Missense_Mutation |              |
| VSCC2 | chr22:46739213-46739213   | C                   | T                   | <i>TRMU</i>     | NM_001282785:exon3:c.C303T:p.C101C,TRMU                       | Silent            |              |
| VSCC2 | chrX:30269369-30269369    | A                   | G                   | <i>MAGEB1</i>   | NM_177404:exon2:c.A759G:p.K253K,MAGEB1                        | Silent            |              |
| VSCC2 | chrX:103499487-103499487  | C                   | T                   | <i>ESX1</i>     | NM_153448:exon1:c.G44A:p.R15H                                 | Missense_Mutation |              |
| VSCC2 | chrX:105011617-105011617  | C                   | T                   | <i>ILIRAPL2</i> | NM_017416:exon11:c.C2024T:p.S675F                             | Missense_Mutation |              |
| VSCC2 | chrX:122765666-122765666  | G                   | A                   | <i>THOC2</i>    | NM_001081550:exon22:c.C2354T:p.A785V                          | Missense_Mutation |              |
| VSCC2 | chr13:32913575-32913575   | G                   | T                   | <i>BRCA2</i>    | NM_000059:exon11:c.G5083T:p.E1695X                            | Nonsense_Mutation | <i>BRCA2</i> |
| VSCC2 | chr12:70963693-70963693   | G                   | A                   | <i>PTPRB</i>    | NM_001206971:exon11:c.C2472T:p.H824H,PTPRB                    | Silent            | <i>PTPRB</i> |
| VSCC2 | chr4:140811081-140811081  | -                   | TGT                 | <i>MAML3</i>    | NM_018717:exon2:c.1508_1509insACA:p.Q503delinsQQ              | In_Frame_Ins      |              |
| VSCC2 | chr9:111734996-111734996  | -                   | T                   | <i>CTNNAL1</i>  | NM_001286974:exon9:c.1305dupA:p.Y436fs,CTNNAL1                | Frame_Shift_Ins   |              |
| VSCC2 | chr11:117789313-117789327 | GGGCTGGA<br>GATGCCT | -                   | <i>TMPRSS13</i> | NM_001077263:exon2:c.248_262del:p.83_88del,TMPRSS13           | In_Frame_Del      |              |
| VSCC2 | chr17:39305775-39305775   | -                   | GGCAGCAG<br>CTGGGGC | <i>KRTAP4-5</i> | NM_033188:exon1:c.244_245insGCCCCAGCTGCTGCC:p.Q82delinsRPSCCQ | In_Frame_Ins      |              |

|        |                          |    |   |                 |                                            |                   |            |
|--------|--------------------------|----|---|-----------------|--------------------------------------------|-------------------|------------|
| VSCC2  | chr19:17397500-17397501  | TT | - | <i>ANKLE1</i>   | NM_001278444:exon8:c.1932_1933del:p.C644fs | Frame_Shift_Del   |            |
| VSCC12 | chr1:16060412-16060412   | C  | A | <i>PLEKHM2</i>  | NM_015164:exon20:c.C3043A:p.R1015R         | Silent            |            |
| VSCC12 | chr1:20005817-20005817   | G  | C | <i>HTR6</i>     | NM_000871:exon3:c.G1279C:p.E427Q           | Missense_Mutation |            |
| VSCC12 | chr1:31897655-31897655   | C  | G | <i>SERINC2</i>  | NM_001199037:exon3:c.C339G:p.F113L,SERINC2 | Missense_Mutation |            |
| VSCC12 | chr1:40773169-40773169   | G  | A | <i>COL9A2</i>   | NM_001852:exon19:c.C957T:p.G319G           | Silent            |            |
| VSCC12 | chr1:44447469-44447469   | C  | A | <i>B4GALT2</i>  | NM_001005417:exon3:c.C422A:p.P141Q,B4GALT2 | Missense_Mutation |            |
| VSCC12 | chr1:57372361-57372361   | C  | T | <i>C8A</i>      | NM_000562:exon8:c.C1118T:p.T373M           | Missense_Mutation |            |
| VSCC12 | chr1:95710101-95710101   | G  | A | <i>RWDD3</i>    | NM_001128142:exon2:c.G420A:p.W140X,RWDD3   | Nonsense_Mutation |            |
| VSCC12 | chr1:151076119-151076119 | C  | A | <i>GABPB2</i>   | NM_144618:exon6:c.C704A:p.S235X            | Nonsense_Mutation |            |
| VSCC12 | chr1:161140956-161140956 | C  | G | <i>PPOX</i>     | NM_000309:exon13:c.C1424G:p.P475R,PPOX     | Missense_Mutation |            |
| VSCC12 | chr1:186358739-186358739 | G  | A | <i>C1orf27</i>  | NM_001164246:exon5:c.G361A:p.D121N,C1orf27 | Missense_Mutation |            |
| VSCC12 | chr1:204379403-204379403 | C  | G | <i>PPP1R15B</i> | NM_032833:exon1:c.G1137C:p.E379D           | Missense_Mutation | COSM721845 |
| VSCC12 | chr1:228285580-228285580 | G  | A | <i>ARF1</i>     | NM_001024226:exon5:c.G412A:p.E138K,ARF1    | Missense_Mutation |            |
| VSCC12 | chr1:233275496-233275496 | G  | A | <i>PCNXL2</i>   | NM_014801:exon20:c.C3623T:p.A1208V         | Missense_Mutation |            |
| VSCC12 | chr1:236923029-236923029 | G  | C | <i>ACTN2</i>    | NM_001103:exon19:c.G2307C:p.K769N,ACTN2    | Missense_Mutation | COSM438891 |
| VSCC12 | chr2:26203478-26203478   | C  | G | <i>KIF3C</i>    | NM_002254:exon1:c.G1309C:p.D437H           | Missense_Mutation |            |
| VSCC12 | chr2:28741348-28741348   | C  | G | <i>PLB1</i>     | NM_001170585:exon3:c.C133G:p.P45A,PLB1     | Missense_Mutation |            |
| VSCC12 | chr2:43452225-43452225   | C  | T | <i>ZFP36L2</i>  | NM_006887:exon2:c.G718A:p.D240N            | Missense_Mutation |            |



|        |                          |   |   |                |                                              |                   |              |
|--------|--------------------------|---|---|----------------|----------------------------------------------|-------------------|--------------|
| VSCC12 | chr2:73718109-73718109   | C | G | <i>ALMS1</i>   | NM_015120:exon10:c.C9020G:p.S3007C           | Missense_Mutation |              |
| VSCC12 | chr2:74653626-74653626   | G | C | <i>RTKN</i>    | NM_001015055:exon12:c.C1436G:p.P479R,RTKN    | Missense_Mutation |              |
| VSCC12 | chr2:97363495-97363495   | C | T | <i>FER1L5</i>  | NM_001293083:exon39:c.C4233T:p.L1411L        | Silent            | COSM397191   |
| VSCC12 | chr2:97483109-97483109   | C | G | <i>CNNM3</i>   | NM_017623:exon1:c.C1095G:p.L365L,CNNM3       | Silent            |              |
| VSCC12 | chr2:182784064-182784064 | G | A | <i>SSFA2</i>   | NM_001287504:exon13:c.G2576A:p.R859Q,SSFA2   | Missense_Mutation |              |
| VSCC12 | chr2:197870481-197870481 | C | T | <i>ANKRD44</i> | NM_001195144:exon21:c.G2284A:p.E762K         | Missense_Mutation |              |
| VSCC12 | chrX:63412990-63412990   | G | A | <i>AMERI</i>   | NM_152424:exon2:c.C177T:p.L59L               | Silent            | <i>AMERI</i> |
| VSCC12 | chr2:224462203-224462203 | C | G | <i>SCG2</i>    | NM_003469:exon2:c.G1798C:p.E600Q             | Missense_Mutation | COSM4840394  |
| VSCC12 | chr2:225719704-225719704 | C | G | <i>DOCK10</i>  | NM_001290263:exon16:c.G1846C:p.D616H,DOCK10  | Missense_Mutation |              |
| VSCC12 | chr2:228337269-228337269 | C | G | <i>AGFG1</i>   | NM_001135187:exon1:c.C132G:p.V44V,AGFG1      | Silent            |              |
| VSCC12 | chr3:32995871-32995871   | C | G | <i>CCR4</i>    | NM_005508:exon2:c.C957G:p.F319L              | Missense_Mutation |              |
| VSCC12 | chr3:38129839-38129839   | C | A | <i>DLEC1</i>   | NM_007335:exon10:c.C1625A:p.S542X,DLEC1      | Nonsense_Mutation |              |
| VSCC12 | chr3:52430652-52430652   | C | A | <i>DNAH1</i>   | NM_015512:exon72:c.C11449A:p.L3817M          | Missense_Mutation |              |
| VSCC12 | chr3:52835148-52835148   | G | A | <i>ITIH3</i>   | NM_002217:exon11:c.G1369A:p.D457N            | Missense_Mutation |              |
| VSCC12 | chr3:100039765-100039765 | C | G | <i>TBC1D23</i> | NM_018309:exon17:c.C1923G:p.F641L,TBC1D23    | Missense_Mutation |              |
| VSCC12 | chr3:129284735-129284735 | G | A | <i>PLXND1</i>  | NM_015103:exon24:c.C4317T:p.R1439R           | Silent            | COSM1721409  |
| VSCC12 | chr3:169824648-169824648 | G | A | <i>PHC3</i>    | NM_001308116:exon12:c.C2404T:p.R802X,PHC3    | Nonsense_Mutation |              |
| VSCC12 | chr4:2701548-2701548     | G | A | <i>FAM193A</i> | NM_001256666:exon17:c.G2776A:p.E926K,FAM193A | Missense_Mutation |              |

|        |                          |   |   |                |                                               |                   |             |
|--------|--------------------------|---|---|----------------|-----------------------------------------------|-------------------|-------------|
| VSCC12 | chr4:2701742-2701742     | G | C | <i>FAM193A</i> | NM_001256666:exon17:c.G2970C:p.M990I,FAM193A  | Missense_Mutation |             |
| VSCC12 | chr4:2701896-2701896     | G | C | <i>FAM193A</i> | NM_001256666:exon17:c.G3124C:p.E1042Q,FAM193A | Missense_Mutation |             |
| VSCC12 | chr4:53492406-53492406   | C | G | <i>USP46</i>   | NM_001134223:exon4:c.G319C:p.D107H,USP46      | Missense_Mutation | COSM2690403 |
| VSCC12 | chr4:57250291-57250291   | G | A | <i>AASDH</i>   | NM_001286671:exon2:c.C175Tp.R59W,AASDH        | Missense_Mutation |             |
| VSCC12 | chr4:72205163-72205163   | G | A | <i>SLC4A4</i>  | NM_003759:exon1:c.G198A:p.T66T,SLC4A4         | Silent            | COSM5459694 |
| VSCC12 | chr4:89358067-89358067   | G | A | <i>HERC6</i>   | NM_001165136:exon18:c.G2320A:p.E774K,HERC6    | Missense_Mutation |             |
| VSCC12 | chr5:37247781-37247781   | A | G | <i>C5orf42</i> | NM_023073:exon2:c.T20C:p.I7T                  | Missense_Mutation |             |
| VSCC12 | chr5:41172399-41172399   | G | A | <i>C6</i>      | NM_000065:exon9:c.C1219Tp.R407C,C6            | Missense_Mutation | COSM3610511 |
| VSCC12 | chr5:59189071-59189071   | C | T | <i>PDE4D</i>   | NM_001104631:exon1:c.G379A:p.A127T            | Missense_Mutation |             |
| VSCC12 | chr5:122734838-122734838 | A | G | <i>CEP120</i>  | NM_001166226:exon5:c.T526C:p.L176L,CEP120     | Silent            |             |
| VSCC12 | chr5:133896546-133896546 | G | A | <i>JADE2</i>   | NM_001289984:exon6:c.G583A:p.E195K,JADE2      | Missense_Mutation |             |
| VSCC12 | chr5:140167520-140167520 | G | A | <i>PCDHA1</i>  | NM_018900:exon1:c.G1645A:p.V549M,PCDHA1       | Missense_Mutation | COSM3393447 |
| VSCC12 | chr5:140474669-140474669 | G | A | <i>PCDHB2</i>  | NM_018936:exon1:c.G295A:p.G99S                | Missense_Mutation |             |
| VSCC12 | chr5:140558415-140558415 | C | T | <i>PCDHB8</i>  | NM_019120:exon1:c.C800Tp.A267V                | Missense_Mutation |             |
| VSCC12 | chr5:154394120-154394120 | C | G | <i>KIF4B</i>   | NM_001099293:exon1:c.C701G:p.S234C            | Missense_Mutation |             |
| VSCC12 | chr5:171639140-171639140 | C | G | <i>UBTD2</i>   | NM_152277:exon3:c.G399C:p.K133N               | Missense_Mutation |             |
| VSCC12 | chr5:172110736-172110736 | G | A | <i>NEURL1B</i> | NM_001308177:exon2:c.G346A:p.V116M,NEURL1B    | Missense_Mutation |             |
| VSCC12 | chr5:176008571-176008571 | C | T | <i>CDHR2</i>   | NM_001171976:exon17:c.C2046T:p.T682T,CDHR2    | Silent            |             |

|        |                          |   |   |                |                                            |                   |             |
|--------|--------------------------|---|---|----------------|--------------------------------------------|-------------------|-------------|
| VSCC12 | chr6:41250153-41250153   | A | G | <i>TREMI</i>   | NM_001242589:exon2:c.T386C:p.I129T,TREMI   | Missense_Mutation | COSM281614  |
| VSCC12 | chr6:43005663-43005663   | G | A | <i>CUL7</i>    | NM_001168370:exon26:c.C5112T:p.D1704D,CUL7 | Silent            |             |
| VSCC12 | chr6:43418993-43418993   | C | T | <i>DLK2</i>    | NM_001286655:exon6:c.G325A:p.G109R,DLK2    | Missense_Mutation |             |
| VSCC12 | chr6:43477425-43477425   | G | C | <i>LRRC73</i>  | NM_001012974:exon1:c.C99G:p.L33L           | Silent            |             |
| VSCC12 | chr6:88136265-88136265   | C | A | <i>CFAP206</i> | NM_001031743:exon8:c.C862A:p.Q288K         | Missense_Mutation |             |
| VSCC12 | chr6:105219890-105219890 | G | A | <i>HACE1</i>   | NM_020771:exon18:c.C1924T:p.R642W          | Missense_Mutation | COSM4852807 |
| VSCC12 | chr6:121768559-121768559 | G | C | <i>GJA1</i>    | NM_000165:exon2:c.G566C:p.R189T            | Missense_Mutation |             |
| VSCC12 | chr6:136709544-136709544 | G | A | <i>MAP7</i>    | NM_001198608:exon5:c.C579T:p.S193S,MAP7    | Silent            | COSM4707457 |
| VSCC12 | chr6:155451331-155451331 | C | T | <i>TIAM2</i>   | NM_012454:exon3:c.C974T:p.T325M            | Missense_Mutation |             |
| VSCC12 | chr6:166743054-166743054 | C | T | <i>SFT2D1</i>  | NM_145169:exon3:c.G174A:p.P58P             | Silent            | COSM1084192 |
| VSCC12 | chr7:1607367-1607367     | C | G | <i>PSMG3</i>   | NM_032302:exon2:c.G336C:p.L112L,PSMG3      | Silent            |             |
| VSCC12 | chr7:2686885-2686885     | C | T | <i>TTYH3</i>   | NM_025250:exon3:c.C403T:p.R135C            | Missense_Mutation | COSM4595034 |
| VSCC12 | chr7:30492002-30492002   | C | T | <i>NOD1</i>    | NM_006092:exon6:c.G1031A:p.R344Q           | Missense_Mutation |             |
| VSCC12 | chr7:66418272-66418272   | G | A | <i>TMEM248</i> | NM_017994:exon6:c.G840A:p.M280I            | Missense_Mutation |             |
| VSCC12 | chr7:113519095-113519095 | G | A | <i>PPP1R3A</i> | NM_002711:exon4:c.C2052T:p.D684D           | Silent            |             |
| VSCC12 | chr7:143095733-143095733 | G | T | <i>EPHA1</i>   | NM_005232:exon6:c.C1297A:p.H433N           | Missense_Mutation |             |
| VSCC12 | chr7:149191319-149191319 | C | T | <i>ZNF746</i>  | NM_001163474:exon2:c.G300A:p.P100P,ZNF746  | Silent            | COSM1755638 |
| VSCC12 | chr8:85785570-85785570   | C | A | <i>RALYL</i>   | NM_001287243:exon6:c.C590A:p.T197N,RALYL   | Missense_Mutation | COSM1455723 |

|        |                          |   |   |                 |                                           |                   |             |
|--------|--------------------------|---|---|-----------------|-------------------------------------------|-------------------|-------------|
| VSCC12 | chr8:121220484-121220484 | G | A | <i>COL14A1</i>  | NM_021110:exon11:c.G1205A:p.G402E         | Missense_Mutation |             |
| VSCC12 | chr8:121298137-121298137 | G | A | <i>COL14A1</i>  | NM_021110:exon33:c.G4005A:p.Q1335Q        | Silent            | COSM455781  |
| VSCC12 | chr8:144688768-144688768 | G | A | <i>PYCR1</i>    | NM_023078:exon4:c.C454T:p.R152W           | Missense_Mutation |             |
| VSCC12 | chr8:145700299-145700299 | G | A | <i>FOXH1</i>    | NM_003923:exon3:c.C420T:p.F140F           | Silent            |             |
| VSCC12 | chr8:146062844-146062844 | G | A | <i>ZNF7</i>     | NM_001282795:exon4:c.G232A:p.D78N,ZNF7    | Missense_Mutation | COSM1184451 |
| VSCC12 | chr9:21481504-21481504   | G | A | <i>IFNE</i>     | NM_176891:exon1:c.C190T:p.Q64X            | Nonsense_Mutation | COSM5063712 |
| VSCC12 | chr9:21481513-21481513   | G | C | <i>IFNE</i>     | NM_176891:exon1:c.C181G:p.L61V            | Missense_Mutation | COSM3847955 |
| VSCC12 | chr9:103054706-103054706 | G | C | <i>INVS</i>     | NM_014425:exon14:c.G2167C:p.E723Q,INVS    | Missense_Mutation |             |
| VSCC12 | chr9:125920679-125920679 | G | A | <i>STRBP</i>    | NM_001171137:exon10:c.C823T:p.R275X,STRBP | Nonsense_Mutation |             |
| VSCC12 | chr9:134334661-134334661 | C | T | <i>PRRC2B</i>   | NM_013318:exon10:c.C1322T:p.A441V         | Missense_Mutation |             |
| VSCC12 | chr9:134526226-134526226 | C | T | <i>RAPGEF1</i>  | NM_001304275:exon2:c.G172A:p.V58I,RAPGEF1 | Missense_Mutation |             |
| VSCC12 | chr9:136083528-136083528 | T | A | <i>OBP2B</i>    | NM_001288987:exon3:c.A269T:p.Y90F,OBP2B   | Missense_Mutation |             |
| VSCC12 | chr10:375376-375376      | G | C | <i>DIP2C</i>    | NM_014974:exon30:c.C3750G:p.L1250L        | Silent            |             |
| VSCC12 | chr10:50534472-50534472  | G | A | <i>C10orf71</i> | NM_001135196:exon3:c.G3882A:p.V1294V      | Silent            |             |
| VSCC12 | chr10:61815765-61815765  | G | A | <i>ANK3</i>     | NM_001149:exon19:c.C2588T:p.S863L,ANK3    | Missense_Mutation |             |
| VSCC12 | chr10:69933900-69933900  | C | T | <i>MYPN</i>     | NM_032578:exon11:c.C2051T:p.S684F,MYPN    | Missense_Mutation |             |
| VSCC12 | chr10:71332374-71332374  | C | T | <i>NEUROG3</i>  | NM_020999:exon2:c.G426A:p.A142A           | Silent            |             |
| VSCC12 | chr10:75413087-75413087  | C | A | <i>SYNPO2L</i>  | NM_001114133:exon3:c.G582T:p.Q194H        | Missense_Mutation | COSM3435940 |

|        |                           |   |   |                |                                           |                   |             |
|--------|---------------------------|---|---|----------------|-------------------------------------------|-------------------|-------------|
| VSCC12 | chr10:104414482-104414482 | G | C | <i>TRIM8</i>   | NM_030912:exon2:c.G643C:p.E215Q           | Missense_Mutation |             |
| VSCC12 | chr10:115970348-115970348 | G | A | <i>TDRD1</i>   | NM_198795:exon12:c.G1393A:p.E465K         | Missense_Mutation |             |
| VSCC12 | chr10:124392756-124392756 | C | T | <i>DMBT1</i>   | NM_004406:exon36:c.C4176T:p.S1392S,DMBT1  | Silent            |             |
| VSCC12 | chr10:134942560-134942560 | G | A | <i>ADGRA1</i>  | NM_001291085:exon4:c.G937A:p.D313N,ADGRA1 | Missense_Mutation |             |
| VSCC12 | chr10:135024202-135024202 | C | G | <i>KNDC1</i>   | NM_152643:exon21:c.C3882G:p.L1294L        | Silent            |             |
| VSCC12 | chr11:4128753-4128753     | G | T | <i>RRM1</i>    | NM_001033:exon4:c.G375T:p.L125L           | Silent            | COSM5960918 |
| VSCC12 | chr11:11470398-11470398   | G | A | <i>GALNT18</i> | NM_198516:exon2:c.C321T:p.P107P           | Silent            |             |
| VSCC12 | chr11:24936083-24936083   | A | T | <i>LUZP2</i>   | NM_001009909:exon7:c.A521T:p.K174M,LUZP2  | Missense_Mutation |             |
| VSCC12 | chr11:35454425-35454425   | G | A | <i>PAMR1</i>   | NM_001282676:exon9:c.C1309T:p.L437L,PAMR1 | Silent            |             |
| VSCC12 | chr11:55798763-55798763   | A | G | <i>OR5A51</i>  | NM_001001921:exon1:c.A869G:p.Y290C        | Missense_Mutation | COSM260742  |
| VSCC12 | chr11:64000245-64000245   | G | T | <i>DNAJC4</i>  | NM_001307980:exon4:c.G438T:p.L146F,DNAJC4 | Missense_Mutation |             |
| VSCC12 | chr11:65479834-65479834   | C | T | <i>KAT5</i>    | NM_001206833:exon1:c.C96T:p.V32V,KAT5     | Silent            | COSM5532999 |
| VSCC12 | chr11:76893106-76893106   | C | T | <i>MYO7A</i>   | NM_000260:exon24:c.C3014T:p.A1005V,MYO7A  | Missense_Mutation |             |
| VSCC12 | chr11:126126690-126126690 | G | A | <i>FAM118B</i> | NM_024556:exon7:c.G925A:p.D309N           | Missense_Mutation |             |
| VSCC12 | chr11:134240278-134240278 | C | G | <i>GLB1L2</i>  | NM_138342:exon12:c.C1200G:p.L400L         | Silent            |             |
| VSCC12 | chr12:5021159-5021159     | C | T | <i>KCNA1</i>   | NM_000217:exon2:c.C615T:p.I205I           | Silent            |             |
| VSCC12 | chr12:25276205-25276205   | C | T | <i>CASC1</i>   | NM_001204101:exon7:c.G823A:p.E275K,CASC1  | Missense_Mutation |             |
| VSCC12 | chr12:32764104-32764104   | A | G | <i>FGD4</i>    | NM_001304480:exon10:c.A1561G:p.M521V,FGD4 | Missense_Mutation |             |

|        |                         |   |   |                |                                          |                   |              |
|--------|-------------------------|---|---|----------------|------------------------------------------|-------------------|--------------|
| VSCC12 | chr12:56743275-56743275 | C | A | <i>STAT2</i>   | NM_005419:exon15:c.G1276T:p.E426X,STAT2  | Nonsense_Mutation |              |
| VSCC12 | chr12:46245036-46245036 | C | T | <i>ARID2</i>   | NM_152641:exon15:c.C3130T:p.Q1044X       | Nonsense_Mutation | <i>ARID2</i> |
| VSCC12 | chr13:25671813-25671813 | G | T | <i>PABPC3</i>  | NM_030979:exon1:c.G1477T:p.A493S         | Missense_Mutation | COSM697145   |
| VSCC12 | chr13:99092981-99092981 | C | T | <i>FARP1</i>   | NM_005766:exon24:c.C2687T:p.S896L,FARP1  | Missense_Mutation |              |
| VSCC12 | chr14:21827753-21827753 | C | A | <i>SUPT16H</i> | NM_007192:exon19:c.G2191T:p.G731W        | Missense_Mutation |              |
| VSCC12 | chr14:25100385-25100385 | C | A | <i>GZMB</i>    | NM_004131:exon5:c.G636T:p.V212V          | Silent            |              |
| VSCC12 | chr14:65260585-65260585 | C | T | <i>SPTB</i>    | NM_000347:exon13:c.G1796A:p.G599E,SPTB   | Missense_Mutation |              |
| VSCC12 | chr15:48521410-48521410 | G | C | <i>SLC12A1</i> | NM_000338:exon6:c.G749C:p.R250T,SLC12A1  | Missense_Mutation |              |
| VSCC12 | chr15:65115996-65115996 | G | A | <i>PIF1</i>    | NM_001286496:exon2:c.C539T:p.A180V,PIF1  | Missense_Mutation |              |
| VSCC12 | chr15:72580727-72580727 | G | C | <i>CELF6</i>   | NM_001172685:exon9:c.C829G:p.Q277E,CELF6 | Missense_Mutation |              |
| VSCC12 | chr16:419104-419104     | G | A | <i>MRPL28</i>  | NM_006428:exon3:c.C405T:p.I135I          | Silent            |              |
| VSCC12 | chr16:2487230-2487230   | C | G | <i>CCNF</i>    | NM_001761:exon5:c.C447G:p.I149M          | Missense_Mutation |              |
| VSCC12 | chr16:28331643-28331643 | G | A | <i>SBK1</i>    | NM_001024401:exon4:c.G676A:p.D226N       | Missense_Mutation |              |
| VSCC12 | chr16:28508611-28508611 | C | A | <i>APOBR</i>   | NM_018690:exon2:c.C2249A:p.P750Q         | Missense_Mutation |              |
| VSCC12 | chr16:54318699-54318699 | G | A | <i>IRX3</i>    | NM_024336:exon2:c.C1094T:p.S365L         | Missense_Mutation |              |
| VSCC12 | chr16:84005769-84005769 | C | T | <i>NECAB2</i>  | NM_019065:exon2:c.C215T:p.A72V           | Missense_Mutation | COSM2694009  |
| VSCC12 | chr17:4846727-4846727   | C | G | <i>RNF167</i>  | NM_015528:exon8:c.C583G:p.R195G          | Missense_Mutation |              |
| VSCC12 | chr17:4848075-4848075   | C | A | <i>RNF167</i>  | NM_015528:exon10:c.C817A:p.Q273K         | Missense_Mutation |              |

|        |                         |   |   |               |                                            |                   |             |
|--------|-------------------------|---|---|---------------|--------------------------------------------|-------------------|-------------|
| VSCC12 | chr17:4850056-4850056   | C | T | <i>PFNI</i>   | NM_005022:exon2:c.G192A:p.L64L             | Silent            |             |
| VSCC12 | chr17:8110565-8110565   | G | A | <i>AURKB</i>  | NM_001256834:exon4:c.C204T:p.F68F,AURKB    | Silent            |             |
| VSCC12 | chr17:8248713-8248713   | C | T | <i>ODF4</i>   | NM_153007:exon2:c.C507T:p.F169F            | Silent            |             |
| VSCC12 | chr17:36491031-36491031 | C | A | <i>GPR179</i> | NM_001004334:exon7:c.G1530T:p.V510V        | Silent            |             |
| VSCC12 | chr17:55027619-55027619 | C | G | <i>COIL</i>   | NM_004645:exon2:c.G984C:p.L328F            | Missense_Mutation |             |
| VSCC12 | chr17:57057807-57057807 | C | T | <i>PPM1E</i>  | NM_014906:exon7:c.C1683T:p.I561I           | Silent            | COSM4822685 |
| VSCC12 | chr17:64800015-64800015 | G | C | <i>PRKCA</i>  | NM_002737:exon17:c.G1879C:p.D627H          | Missense_Mutation |             |
| VSCC12 | chr17:76399975-76399975 | C | T | <i>PGS1</i>   | NM_024419:exon7:c.C1207T:p.R403W           | Missense_Mutation |             |
| VSCC12 | chr18:18622658-18622658 | G | A | <i>ROCK1</i>  | NM_005406:exon7:c.C688T:p.R230X            | Nonsense_Mutation |             |
| VSCC12 | chr18:21357542-21357542 | C | T | <i>LAMA3</i>  | NM_001127717:exon11:c.C1427T:p.S476F,LAMA3 | Missense_Mutation |             |
| VSCC12 | chr19:12984281-12984281 | C | T | <i>MAST1</i>  | NM_014975:exon25:c.C3407T:p.S1136L         | Missense_Mutation |             |
| VSCC12 | chr19:14083774-14083774 | G | A | <i>RFX1</i>   | NM_002918:exon9:c.C1095T:p.V365V           | Silent            |             |
| VSCC12 | chr19:14083934-14083934 | G | A | <i>RFX1</i>   | NM_002918:exon9:c.C935T:p.S312F            | Missense_Mutation |             |
| VSCC12 | chr19:17397393-17397393 | G | C | <i>ANKLE1</i> | NM_001278444:exon8:c.G1825C:p.E609Q        | Missense_Mutation |             |
| VSCC12 | chr19:17566692-17566692 | G | T | <i>NXNLI</i>  | NM_138454:exon2:c.C403A:p.R135S            | Missense_Mutation |             |
| VSCC12 | chr19:17566762-17566762 | G | A | <i>NXNLI</i>  | NM_138454:exon2:c.C333T:p.L111L            | Silent            |             |
| VSCC12 | chr19:17756511-17756511 | G | A | <i>UNC13A</i> | NM_001080421:exon18:c.C2328T:p.S776S       | Silent            |             |
| VSCC12 | chr19:36212683-36212683 | C | T | <i>KMT2B</i>  | NM_014727:exon3:c.C2434T:p.Q812X           | Nonsense_Mutation | COSM5080757 |

|        |                          |   |   |                 |                                            |                   |              |
|--------|--------------------------|---|---|-----------------|--------------------------------------------|-------------------|--------------|
| VSCC12 | chr19:36221514-36221514  | A | G | <i>KMT2B</i>    | NM_014727:exon25:c.A5273G:p.Y1758C         | Missense_Mutation |              |
| VSCC12 | chr19:43967881-43967881  | C | A | <i>LYPD3</i>    | NM_014400:exon3:c.G252T:p.S84S             | Silent            |              |
| VSCC12 | chr19:48048314-48048314  | G | A | <i>ZNF541</i>   | NM_001277075:exon3:c.C1472T:p.S491L        | Missense_Mutation |              |
| VSCC12 | chr19:48954053-48954053  | G | A | <i>GRWD1</i>    | NM_031485:exon5:c.G813A:p.P271P            | Silent            |              |
| VSCC12 | chr19:56538774-56538774  | G | A | <i>NLRP5</i>    | NM_153447:exon7:c.G1175A:p.R392H           | Missense_Mutation |              |
| VSCC12 | chr20:20618075-20618075  | C | T | <i>RALGAPA2</i> | NM_020343:exon8:c.G737A:p.R246Q            | Missense_Mutation |              |
| VSCC12 | chr20:30386185-30386185  | C | G | <i>TPX2</i>     | NM_012112:exon17:c.C1963G:p.L655V          | Missense_Mutation |              |
| VSCC12 | chr20:31596467-31596467  | C | G | <i>BPIFB2</i>   | NM_025227:exon2:c.C87G:p.L29L              | Silent            | COSM1217476  |
| VSCC12 | chr20:62119675-62119675  | C | G | <i>EEF1A2</i>   | NM_001958:exon8:c.G1368C:p.Q456H           | Missense_Mutation | COSM4865737  |
| VSCC12 | chr22:22890932-22890932  | C | T | <i>PRAME</i>    | NM_001291719:exon4:c.G1039A:p.D347N,PRAME  | Missense_Mutation |              |
| VSCC12 | chr22:29879407-29879407  | C | T | <i>NEFH</i>     | NM_021076:exon2:c.C927T:p.D309D            | Silent            |              |
| VSCC12 | chrX:53613791-53613791   | G | A | <i>HUWE1</i>    | NM_031407:exon38:c.C4693T:p.Q1565X         | Nonsense_Mutation |              |
| VSCC12 | chrX:77270248-77270248   | C | G | <i>ATP7A</i>    | NM_001282224:exon10:c.C2262G:p.L754L,ATP7A | Silent            |              |
| VSCC12 | chrX:83411163-83411163   | G | A | <i>RPS6KA6</i>  | NM_014496:exon3:c.C178T:p.H60Y             | Missense_Mutation |              |
| VSCC12 | chrX:114468436-114468436 | C | T | <i>LRCH2</i>    | NM_001243963:exon1:c.G169A:p.G57S,LRCH2    | Missense_Mutation |              |
| VSCC12 | chrX:134426397-134426397 | G | A | <i>ZNF75D</i>   | NM_007131:exon4:c.C414T:p.V138V            | Silent            |              |
| VSCC12 | chrX:153537746-153537746 | G | A | <i>TKTL1</i>    | NM_001145934:exon2:c.G134A:p.G45E,TKTL1    | Missense_Mutation |              |
| VSCC12 | chr13:32906981-32906981  | G | C | <i>BRCA2</i>    | NM_000059:exon10:c.G1366C:p.E456Q          | Missense_Mutation | <i>BRCA2</i> |



|        |                           |                 |        |                   |                                                             |                    |               |             |
|--------|---------------------------|-----------------|--------|-------------------|-------------------------------------------------------------|--------------------|---------------|-------------|
| VSCC12 | chr13:32907084-32907084   | G               | A      | <i>BRCA2</i>      | NM_000059:exon10:c.G1469A:p.G490E                           | Missense_Mutation  | <i>BRCA2</i>  | COSM5476895 |
| VSCC12 | chr2:202149751-202149751  | C               | T      | <i>CASP8</i>      | NM_033356:exon7:c.C970T:p.Q324X,CASP8                       | Nonsense_Mutation  | <i>CASP8</i>  |             |
| VSCC12 | chr19:42383268-42383268   | G               | A      | <i>CD79A</i>      | NM_001783:exon2:c.G288A:p.V96V                              | Silent             | <i>CD79A</i>  |             |
| VSCC12 | chr19:42797319-42797319   | C               | A      | <i>CIC</i>        | NM_015125:exon15:c.C3681A:p.P1227P,CIC                      | Silent             | <i>CIC</i>    | COSM3390415 |
| VSCC12 | chr16:3777833-3777833     | C               | G      | <i>CREBBP</i>     | NM_001079846:exon30:c.G7101C:p.Q2367H,CREBBP                | Missense_Mutation  | <i>CREBBP</i> |             |
| VSCC12 | chr4:153247175-153247175  | T               | C      | <i>FBXW7</i>      | NM_001013415:exon9:c.A1273G:p.R425G,FBXW7                   | Missense_Mutation  | <i>FBXW7</i>  |             |
| VSCC12 | chr12:49434236-49434236   | G               | A      | <i>KMT2D</i>      | NM_003482:exon31:c.C7317T:p.P2439P                          | Silent             | <i>KMT2D</i>  |             |
| VSCC12 | chr9:139413049-139413049  | G               | A      | <i>NOTCH1</i>     | NM_017617:exon6:c.C1093T:p.R365C                            | Missense_Mutation  | <i>NOTCH1</i> |             |
| VSCC12 | chr12:111856313-111856313 | G               | A      | <i>SH2B3</i>      | NM_005475:exon2:c.G364A:p.E122K                             | Missense_Mutation  | <i>SH2B3</i>  |             |
| VSCC12 | chr17:7577511-7577511     | A               | C      | <i>TP53</i>       | NM_001126115:exon3:c.T374G:p.L125R,TP53                     | Missense_Mutation  | <i>TP53</i>   |             |
| VSCC12 | chr11:95825375-95825383   | TGCTGCTGC       | -      | <i>MAML2</i>      | NM_032427:exon2:c.1812_1820del:p.604_607del                 | In_Frame_Deletion  | <i>MAML2</i>  |             |
| VSCC12 | chr2:88926730-88926732    | CAG             | -      | <i>EIF2AK3</i>    | NM_004836:exon1:c.61_63del:p.21_21del                       | In_Frame_Deletion  |               | COSM4958453 |
| VSCC12 | chr3:27763427-27763427    | -               | CGGCGC | <i>EOMES</i>      | NM_001278182:exon1:c.358_359insGCGCCG;p.A120delinsGAA,EOMES | In_Frame_Insertion |               |             |
| VSCC12 | chr4:140811081-140811081  | -               | TGT    | <i>MAML3</i>      | NM_018717:exon2:c.1508_1509insACA;p.Q503delinsQQ            | In_Frame_Insertion |               |             |
| VSCC12 | chr8:74153720-74153720    | -               | T      | <i>C8orf89</i>    | NM_001243237:exon4:c.457dupA;p.S153fs                       | Frame_Shift_Ins    |               |             |
| VSCC12 | chr9:100092968-100092968  | -               | GAGGAG | <i>CCDC180</i>    | NM_020893:exon18:c.2325_2326insGAGGAG;p.E775delinsEEE       | In_Frame_Insertion |               |             |
| VSCC12 | chr21:46057613-46057627   | CTGCTGTGTGCCTGT | -      | <i>KRTAP10-10</i> | NM_181688:exon1:c.279_293del;p.93_98del                     | In_Frame_Deletion  |               |             |
| VSCC12 | chr22:29885599-29885604   | AGGAAG          | -      | <i>NEFH</i>       | NM_021076:exon4:c.1970_1975del:p.657_659del                 | In_Frame_Deletion  |               | COSM5048034 |

|       |                          |   |   |                |                                             |                   |               |             |
|-------|--------------------------|---|---|----------------|---------------------------------------------|-------------------|---------------|-------------|
| VSCC4 | chr14:99642095-99642095  | C | A | <i>BCL11B</i>  | NM_001282238:exon3:c.G862T:p.A288S,BCL11B   | Missense_Mutation | <i>BCL11B</i> | COSM3773425 |
| VSCC4 | chr1:9795145-9795145     | C | G | <i>CLSTN1</i>  | NM_001302883:exon13:c.G1914C;p.L638L,CLSTN1 | Silent            |               | COSM3773426 |
| VSCC4 | chr1:9815291-9815291     | C | A | <i>CLSTN1</i>  | NM_014944:exon3:c.G291T:p.E97D,CLSTN1       | Missense_Mutation |               |             |
| VSCC4 | chr1:27219019-27219019   | C | T | <i>GPATCH3</i> | NM_022078:exon6:c.G1244A:p.R415Q            | Missense_Mutation |               | COSM5914625 |
| VSCC4 | chr1:44157238-44157238   | G | C | <i>KDM4A</i>   | NM_014663:exon15:c.G2314C:p.E772Q           | Missense_Mutation |               | COSM4727900 |
| VSCC4 | chr1:74507427-74507427   | T | C | <i>LRRIQ3</i>  | NM_001105659:exon7:c.A1188G:p.K396K         | Silent            |               |             |
| VSCC4 | chr1:114444395-114444395 | G | A | <i>AP4B1</i>   | NM_001253852:exon3:c.C451T:p.H151Y,AP4B1    | Missense_Mutation |               |             |
| VSCC4 | chr1:114483091-114483091 | C | G | <i>HIPK1</i>   | NM_152696:exon2:c.C86G:p.S29C,HIPK1         | Missense_Mutation |               |             |
| VSCC4 | chr1:146743861-146743861 | G | A | <i>CHD1L</i>   | NM_001256338:exon6:c.G577A:p.V193M,CHD1L    | Missense_Mutation |               |             |
| VSCC4 | chr1:150199042-150199042 | C | A | <i>ANP32E</i>  | NM_001136478:exon4:c.G456T:p.E152D,ANP32E   | Missense_Mutation |               |             |
| VSCC4 | chr1:150199045-150199045 | T | C | <i>ANP32E</i>  | NM_001280560:exon4:c.A410G:p.K137R          | Missense_Mutation |               |             |
| VSCC4 | chr1:158549602-158549602 | G | C | <i>OR10X1</i>  | NM_001004477:exon1:c.C88G:p.L30V            | Missense_Mutation |               |             |
| VSCC4 | chr1:169512109-169512109 | C | T | <i>F5</i>      | NM_000130:exon13:c.G2219A:p.R740Q           | Missense_Mutation |               | COSM3798502 |
| VSCC4 | chr1:173486813-173486813 | C | A | <i>SLC9C2</i>  | NM_178527:exon23:c.G2770T:p.E924X           | Nonsense_Mutation |               |             |
| VSCC4 | chr1:179461992-179461992 | G | A | <i>AXDND1</i>  | NM_144696:exon20:c.G2294A:p.C765Y           | Missense_Mutation |               |             |
| VSCC4 | chr1:197128599-197128599 | G | A | <i>ZBTB41</i>  | NM_194314:exon10:c.C2620T:p.R874X           | Nonsense_Mutation |               |             |
| VSCC4 | chr1:216262423-216262423 | T | C | <i>USH2A</i>   | NM_206933:exon23:c.A4817G:p.K1606R          | Missense_Mutation |               |             |
| VSCC4 | chr1:222717463-222717463 | C | T | <i>HHIPL2</i>  | NM_024746:exon2:c.G390A:p.P130P             | Silent            |               |             |

|       |                          |   |   |                |                                                 |                       |             |
|-------|--------------------------|---|---|----------------|-------------------------------------------------|-----------------------|-------------|
| VSCC4 | chr2:3523255-3523255     | C | T | <i>ADII</i>    | NM_018269:exon1:c.G4A:p.V2<br>M                 | Missense_M<br>utation | COSM3574689 |
| VSCC4 | chr2:5833299-5833299     | G | T | <i>SOX11</i>   | NM_003108:exon1:c.G446T:p.S1<br>49I             | Missense_M<br>utation |             |
| VSCC4 | chr2:24090720-24090720   | C | T | <i>ATAD2B</i>  | NM_001242338:exon10:c.G1173<br>A:p.M391I,ATAD2B | Missense_M<br>utation |             |
| VSCC4 | chr2:26684977-26684977   | C | T | <i>OTOF</i>    | NM_194322:exon24:c.G3195A:p.<br>E1065E,OTOF     | Silent                |             |
| VSCC4 | chr2:39515356-39515356   | C | T | <i>MAP4K3</i>  | NM_001270425:exon19:c.G1317<br>A:p.K439K,MAP4K3 | Silent                |             |
| VSCC4 | chr2:73677471-73677471   | G | A | <i>ALMS1</i>   | NM_015120:exon8:c.G3814A:p.<br>D1272N           | Missense_M<br>utation |             |
| VSCC4 | chr2:128380859-128380859 | C | A | <i>MYO7B</i>   | NM_001080527:exon28:c.C3650<br>A:p.S1217Y       | Missense_M<br>utation |             |
| VSCC4 | chr2:135988267-135988267 | C | T | <i>ZRANB3</i>  | NM_001286568:exon13:c.G1770<br>A:p.S590S,ZRANB3 | Silent                |             |
| VSCC4 | chr2:180308074-180308074 | G | A | <i>ZNF385B</i> | NM_001113397:exon8:c.C1091T<br>:p.S364L,ZNF385B | Missense_M<br>utation |             |
| VSCC4 | chr2:201469460-201469460 | C | T | <i>AOX1</i>    | NM_001159:exon9:c.C711T:p.G<br>237G             | Silent                |             |
| VSCC4 | chr2:204193297-204193297 | C | T | <i>ABI2</i>    | NM_001282925:exon1:c.C60T:p.<br>F20F,ABI2       | Silent                |             |
| VSCC4 | chr2:206166376-206166376 | G | A | <i>PARD3B</i>  | NM_057177:exon17:c.G2374A:p.<br>E792K,PARD3B    | Missense_M<br>utation |             |
| VSCC4 | chr2:220405117-220405117 | G | A | <i>CHPF</i>    | NM_001195731:exon4:c.C830T:<br>p.P277L,CHPF     | Missense_M<br>utation |             |
| VSCC4 | chr2:224828474-224828474 | A | G | <i>MRPL44</i>  | NM_022915:exon3:c.A650G:p.D<br>217G             | Missense_M<br>utation |             |
| VSCC4 | chr2:241514540-241514540 | G | A | <i>RNPEPL1</i> | NM_018226:exon7:c.G1382A:p.<br>R461H            | Missense_M<br>utation |             |
| VSCC4 | chr3:11060381-11060381   | C | A | <i>SLC6A1</i>  | NM_003042:exon5:c.C468A:p.T<br>156T             | Silent                |             |
| VSCC4 | chr3:50334777-50334777   | C | T | <i>NAT6</i>    | NM_001200016:exon2:c.G118A:<br>p.E40K,NAT6      | Missense_M<br>utation |             |
| VSCC4 | chr3:53381523-53381523   | C | A | <i>DCPIA</i>   | NM_001290204:exon1:c.G22T:p.<br>G8W,DCPIA       | Missense_M<br>utation |             |

|       |                          |   |   |                |                                             |                   |             |
|-------|--------------------------|---|---|----------------|---------------------------------------------|-------------------|-------------|
| VSCC4 | chr3:107799099-107799099 | C | A | <i>CD47</i>    | NM_001777:exon2:c.G139T:p.E47X,CD47         | Nonsense_Mutation | COSM1420639 |
| VSCC4 | chr3:110837518-110837518 | G | T | <i>PVRL3</i>   | NM_001243286:exon3:c.G518T:p.S173I,PVRL3    | Missense_Mutation |             |
| VSCC4 | chr3:111658418-111658418 | T | G | <i>PHLDB2</i>  | NM_145753:exon6:c.T2098G:p.L700V,PHLDB2     | Missense_Mutation | COSM209548  |
| VSCC4 | chr3:113252031-113252031 | G | A | <i>SIDT1</i>   | NM_001308350:exon1:c.G163A:p.V55M,SIDT1     | Missense_Mutation | COSM1658914 |
| VSCC4 | chr3:122419696-122419696 | C | A | <i>PARP14</i>  | NM_017554:exon6:c.C2295A:p.I765I            | Silent            |             |
| VSCC4 | chr3:134079134-134079134 | A | G | <i>AMOTL2</i>  | NM_001278683:exon7:c.T1871C:p.M624T,AMOTL2  | Missense_Mutation |             |
| VSCC4 | chr3:142753766-142753766 | C | T | <i>U2SURP</i>  | NM_001080415:exon19:c.C1890T:p.L630L        | Silent            |             |
| VSCC4 | chr3:159997068-159997068 | G | A | <i>IFT80</i>   | NM_001190242:exon15:c.C1338T:p.I446I,IFT80  | Silent            |             |
| VSCC4 | chr3:172165640-172165640 | G | A | <i>GHSR</i>    | NM_004122:exon1:c.C564T:p.N188N,GHSR        | Silent            | COSM5648785 |
| VSCC4 | chr3:172835147-172835147 | C | T | <i>SPATA16</i> | NM_031955:exon2:c.G375A:p.M125I             | Missense_Mutation | COSM734753  |
| VSCC4 | chr3:183209837-183209837 | C | T | <i>KLHL6</i>   | NM_130446:exon7:c.G1744A:p.E582K            | Missense_Mutation |             |
| VSCC4 | chr3:197518405-197518405 | C | A | <i>LRCH3</i>   | NM_032773:exon1:c.C256A:p.R86R              | Silent            |             |
| VSCC4 | chr4:1399797-1399797     | C | T | <i>NKX1-1</i>  | NM_001290079:exon1:c.G434A:p.G145E          | Missense_Mutation |             |
| VSCC4 | chr4:10447128-10447128   | G | C | <i>ZNF518B</i> | NM_053042:exon3:c.C825G:p.I275M             | Missense_Mutation |             |
| VSCC4 | chr4:26741532-26741532   | G | T | <i>TBC1D19</i> | NM_001292054:exon14:c.G969T:p.Q323H,TBC1D19 | Missense_Mutation |             |
| VSCC4 | chr4:72413432-72413432   | T | G | <i>SLC4A4</i>  | NM_003759:exon17:c.T2557G:p.L853V,SLC4A4    | Missense_Mutation |             |
| VSCC4 | chr4:73154571-73154571   | G | A | <i>ADAMTS3</i> | NM_014243:exon21:c.C2946T:p.C982C           | Silent            |             |
| VSCC4 | chr4:77662185-77662185   | G | A | <i>SHROOM3</i> | NM_020859:exon5:c.G2859A:p.A953A            | Silent            |             |

|       |                          |   |   |                               |                                            |                   |             |
|-------|--------------------------|---|---|-------------------------------|--------------------------------------------|-------------------|-------------|
| VSCC4 | chr4:77676140-77676140   | G | A | <i>SHROOM3</i>                | NM_020859:exon7:c.G4504A:p.E1502K          | Missense_Mutation |             |
| VSCC4 | chr4:138450923-138450923 | G | A | <i>PCDH18</i>                 | NM_001300828:exon1:c.C2320T;p.H774Y,PCDH18 | Missense_Mutation |             |
| VSCC4 | chr4:154625632-154625632 | C | T | <i>TLR2</i>                   | NM_003264:exon3:c.C1573T;p.L525L           | Silent            |             |
| VSCC4 | chr4:159076927-159076927 | T | C | <i>FAM198B</i>                | NM_001128424:exon3:c.A961G;p.S321G,FAM198B | Missense_Mutation |             |
| VSCC4 | chr4:183720994-183720994 | C | T | <i>TENM3</i>                  | NM_001080477:exon28:c.C7590T;p.N2530N      | Silent            |             |
| VSCC4 | chr4:185684335-185684335 | C | T | <i>ACSL1</i>                  | NM_001286711:exon15:c.G1405A;p.E469K,ACSL1 | Missense_Mutation |             |
| VSCC4 | chr4:186381296-186381296 | C | G | <i>CCDC110</i>                | NM_001145411:exon5:c.G334C;p.D112H,CCDC110 | Missense_Mutation |             |
| VSCC4 | chr5:19473391-19473391   | C | T | <i>CDH18</i>                  | NM_004934:exon13:c.G2317A:p.E773K,CDH18    | Missense_Mutation |             |
| VSCC4 | chr5:34937653-34937653   | C | T | <i>DNAJC21</i>                | NM_001012339:exon5:c.C661T;p.R221X,DNAJC21 | Nonsense_Mutation | COSM3850748 |
| VSCC4 | chr5:41927207-41927207   | A | T | <i>FBXO4</i>                  | NM_001297437:exon2:c.A282T;p.R94S,FBXO4    | Missense_Mutation | COSM1594968 |
| VSCC4 | chr5:45695947-45695947   | G | A | <i>HCN1</i>                   | NM_021072:exon1:c.C249T;p.D83D             | Silent            |             |
| VSCC4 | chr5:79032748-79032748   | T | C | <i>CMYA5</i>                  | NM_153610:exon2:c.T8160C;p.T2720T          | Silent            |             |
| VSCC4 | chr5:89924570-89924570   | C | A | <i>ADGRV1</i>                 | NM_032119:exon8:c.C1430A;p.P477Q           | Missense_Mutation |             |
| VSCC4 | chr5:127638773-127638773 | C | T | <i>FBN2</i>                   | NM_001999:exon46:c.G5809A;p.E1937K         | Missense_Mutation | COSM1252962 |
| VSCC4 | chr5:139838870-139838870 | C | A | <i>ANKHD1,ANKHD1-EIF4EBP3</i> | NM_001197030:exon9:c.C1602A;p.G534G,ANKHD1 | Silent            |             |
| VSCC4 | chr5:140167635-140167635 | C | T | <i>PCDHA1</i>                 | NM_018900:exon1:c.C1760T;p.A587V,PCDHA1    | Missense_Mutation |             |
| VSCC4 | chr5:140739726-140739726 | C | T | <i>PCDHGB2</i>                | NM_018923:exon1:c.C24T;p.C8C,PCDHGB2       | Silent            |             |
| VSCC4 | chr5:150924288-150924288 | G | A | <i>FAT2</i>                   | NM_001447:exon9:c.C6400T;p.Q2134X          | Nonsense_Mutation | COSM5529089 |

|       |                          |   |   |                |                                          |                   |             |
|-------|--------------------------|---|---|----------------|------------------------------------------|-------------------|-------------|
| VSCC4 | chr5:150925730-150925730 | G | A | <i>FAT2</i>    | NM_001447:exon9:c.C4958T:p.S1653L        | Missense_Mutation |             |
| VSCC4 | chr5:156916185-156916185 | G | A | <i>ADAM19</i>  | NM_033274:exon20:c.C2250T:p.F750F        | Silent            |             |
| VSCC4 | chr5:161113276-161113276 | T | G | <i>GABRA6</i>  | NM_000811:exon2:c.T79G:p.F27V            | Missense_Mutation |             |
| VSCC4 | chr5:178770786-178770786 | G | A | <i>ADAMTS2</i> | NM_014244:exon2:c.C516T:p.L172L,ADAMTS2  | Silent            |             |
| VSCC4 | chr6:56475230-56475230   | C | T | <i>DST</i>     | NM_015548:exon25:c.G3667A:p.E1223K,DST   | Missense_Mutation |             |
| VSCC4 | chr6:70964222-70964222   | C | T | <i>COL9A1</i>  | NM_078485:exon19:c.G947A:p.G316E,COL9A1  | Missense_Mutation | COSM1698601 |
| VSCC4 | chr6:70964223-70964223   | C | T | <i>COL9A1</i>  | NM_078485:exon19:c.G946A:p.G316R,COL9A1  | Missense_Mutation |             |
| VSCC4 | chr6:101095286-101095286 | C | T | <i>ASCC3</i>   | NM_006828:exon21:c.G3294A:p.L1098L       | Silent            |             |
| VSCC4 | chr6:116381157-116381157 | A | C | <i>FRK</i>     | NM_002031:exon1:c.T318G:p.A106A          | Silent            | COSM1092642 |
| VSCC4 | chr6:150710624-150710624 | C | T | <i>IYD</i>     | NM_001164694:exon2:c.C315T:p.F105F,IYD   | Silent            |             |
| VSCC4 | chr6:152734607-152734607 | C | T | <i>SYNE1</i>   | NM_033071:exon42:c.G6131A:p.W2044X,SYNE1 | Nonsense_Mutation |             |
| VSCC4 | chr7:938885-938885       | C | T | <i>ADAP1</i>   | NM_001284311:exon8:c.G596A:p.R199Q,ADAP1 | Missense_Mutation |             |
| VSCC4 | chr7:41729682-41729682   | C | T | <i>INHBA</i>   | NM_002192:exon3:c.G847A:p.E283K          | Missense_Mutation | COSM3878867 |
| VSCC4 | chr7:48335382-48335382   | A | G | <i>ABCA13</i>  | NM_152701:exon21:c.A9041G:p.K3014R       | Missense_Mutation |             |
| VSCC4 | chr7:72849141-72849141   | C | T | <i>FZD9</i>    | NM_003508:exon1:c.C804T:p.I268I          | Silent            | COSM3718877 |
| VSCC4 | chr7:87214992-87214992   | C | T | <i>ABCB1</i>   | NM_000927:exon5:c.G122A:p.R41H           | Missense_Mutation |             |
| VSCC4 | chr7:99956672-99956672   | A | T | <i>PILRB</i>   | NM_178238:exon2:c.A424T:p.I142F          | Missense_Mutation |             |
| VSCC4 | chr7:112579712-112579712 | C | G | <i>C7orf60</i> | NM_152556:exon1:c.G94C:p.E32Q            | Missense_Mutation | COSM3315991 |

|       |                          |   |   |                |                                              |                   |             |
|-------|--------------------------|---|---|----------------|----------------------------------------------|-------------------|-------------|
| VSCC4 | chr7:133682246-133682246 | G | A | <i>EXOC4</i>   | NM_021807:exon15:c.G2208A:p.M736I            | Missense_Mutation |             |
| VSCC4 | chr7:142561853-142561853 | G | A | <i>EPHB6</i>   | NM_004445:exon4:c.G295A:p.G99R               | Missense_Mutation |             |
| VSCC4 | chr7:149422484-149422484 | C | T | <i>KRBA1</i>   | UNKNOWN                                      | unknown           |             |
| VSCC4 | chr8:38110553-38110553   | C | T | <i>DDHD2</i>   | NM_001164232:exon15:c.C1799T:p.S600F,DDHD2   | Missense_Mutation |             |
| VSCC4 | chr8:106814672-106814672 | T | C | <i>ZFPM2</i>   | NM_012082:exon8:c.T2362C:p.C788R             | Missense_Mutation |             |
| VSCC4 | chr8:124714888-124714888 | G | A | <i>ANXA13</i>  | NM_004306:exon3:c.C180T:p.Y60Y,ANXA13        | Silent            |             |
| VSCC4 | chr8:134025859-134025859 | G | T | <i>TG</i>      | NM_003235:exon37:c.G6412T:p.E2138X           | Nonsense_Mutation |             |
| VSCC4 | chr9:2054668-2054668     | G | A | <i>SMARCA2</i> | NM_001289396:exon6:c.G1118A:p.R373K,SMARCA2  | Missense_Mutation |             |
| VSCC4 | chr9:27950124-27950124   | G | T | <i>LINGO2</i>  | NM_001258282:exon7:c.C546A:p.L182L,LINGO2    | Silent            |             |
| VSCC4 | chr9:79898372-79898372   | G | A | <i>VPS13A</i>  | NM_001018038:exon30:c.G3220A:p.E1074K,VPS13A | Missense_Mutation | COSM5415387 |
| VSCC4 | chr9:86571232-86571232   | C | T | <i>C9orf64</i> | NM_032307:exon1:c.G184A:p.E62K               | Missense_Mutation |             |
| VSCC4 | chr9:100407480-100407480 | G | A | <i>NCBPI</i>   | NM_002486:exon5:c.G463A:p.V155I              | Missense_Mutation |             |
| VSCC4 | chr9:103348704-103348704 | C | G | <i>MURC</i>    | NM_001018116:exon2:c.C1066G:p.L356V          | Missense_Mutation |             |
| VSCC4 | chr9:139837144-139837144 | G | A | <i>FBXW5</i>   | NM_018998:exon5:c.C530T:p.S177F              | Missense_Mutation |             |
| VSCC4 | chr9:140918181-140918181 | A | G | <i>CACNA1B</i> | NM_000718:exon19:c.A2986G:p.T996A,CACNA1B    | Missense_Mutation |             |
| VSCC4 | chr10:5694998-5694998    | C | A | <i>ASB13</i>   | NM_024701:exon2:c.G59T:p.R20L                | Missense_Mutation |             |
| VSCC4 | chr10:15170400-15170400  | C | G | <i>NMT2</i>    | NM_004808:exon8:c.G948C:p.L316F,NMT2         | Missense_Mutation |             |
| VSCC4 | chr10:17632368-17632368  | C | G | <i>HACD1</i>   | NM_014241:exon7:c.G862C:p.D288H              | Missense_Mutation |             |
| VSCC4 | chr10:50040747-50040747  | A | G | <i>WDFY4</i>   | NM_020945:exon39:c.A6656G:p.K2219R           | Missense_Mutation |             |

|       |                           |   |   |                 |                                                |                       |              |
|-------|---------------------------|---|---|-----------------|------------------------------------------------|-----------------------|--------------|
| VSCC4 | chr10:73565656-73565656   | G | C | <i>CDH23</i>    | NM_001171933:exon9:c.G1246C<br>:p.A416P,CDH23  | Missense_M<br>utation |              |
| VSCC4 | chr10:83635818-83635818   | C | T | <i>NRG3</i>     | NM_001010848:exon1:c.C722T:<br>p.S241F,NRG3    | Missense_M<br>utation |              |
| VSCC4 | chr10:101985699-101985699 | C | T | <i>CHUK</i>     | NM_001278:exon2:c.G181A:p.E<br>61K             | Missense_M<br>utation |              |
| VSCC4 | chr10:118396354-118396354 | A | C | <i>PNLIPRP2</i> | UNKNOWN                                        | unknown               |              |
| VSCC4 | chr10:124697240-124697240 | C | T | <i>C10orf88</i> | NM_024942:exon5:c.G1084A:p.<br>E362K           | Missense_M<br>utation |              |
| VSCC4 | chr10:134039060-134039060 | G | A | <i>STK32C</i>   | NM_173575:exon6:c.C743T:p.T2<br>48M            | Missense_M<br>utation |              |
| VSCC4 | chr11:400415-400415       | C | G | <i>PKP3</i>     | NM_007183:exon7:c.C1530G:p.I<br>510M,PKP3      | Missense_M<br>utation |              |
| VSCC4 | chr11:4673799-4673799     | T | G | <i>OR51E1</i>   | NM_152430:exon2:c.T43G:p.F15<br>V              | Missense_M<br>utation |              |
| VSCC4 | chr11:5020365-5020365     | T | C | <i>OR51L1</i>   | NM_001004755:exon1:c.T153C:<br>p.I51I          | Silent                |              |
| VSCC4 | chr11:7846715-7846715     | C | T | <i>OR5P3</i>    | NM_153445:exon1:c.G805A:p.D<br>269N            | Missense_M<br>utation |              |
| VSCC4 | chr11:35336715-35336715   | G | A | <i>SLC1A2</i>   | NM_004171:exon3:c.C165T:p.I5<br>5I,SLC1A2      | Silent                |              |
| VSCC4 | chr11:102819790-102819790 | C | G | <i>MMP13</i>    | NM_002427:exon7:c.G1015C:p.<br>E339Q           | Missense_M<br>utation |              |
| VSCC4 | chr17:37618494-37618494   | C | T | <i>CDK12</i>    | NM_015083:exon1:c.C170T:p.T5<br>7I,CDK12       | Missense_M<br>utation | <i>CDK12</i> |
| VSCC4 | chr12:6664694-6664694     | C | T | <i>IFFO1</i>    | NM_001039670:exon1:c.G502A:<br>p.A168T,IFFO1   | Missense_M<br>utation |              |
| VSCC4 | chr12:21453339-21453339   | C | T | <i>SLCO1A2</i>  | NM_021094:exon7:c.G853A:p.E<br>285K,SLCO1A2    | Missense_M<br>utation |              |
| VSCC4 | chr12:23687156-23687156   | G | C | <i>SOX5</i>     | NM_178010:exon7:c.C1131G:p.<br>N377K,SOX5      | Missense_M<br>utation |              |
| VSCC4 | chr12:41967433-41967433   | T | G | <i>PDZRN4</i>   | NM_013377:exon8:c.T2078G:p.<br>V693G,PDZRN4    | Missense_M<br>utation |              |
| VSCC4 | chr12:85267022-85267022   | A | G | <i>SLC6A15</i>  | NM_001146335:exon6:c.T632C:<br>p.I211T,SLC6A15 | Missense_M<br>utation |              |
| VSCC4 | chr12:120796816-120796816 | C | T | <i>MSH1</i>     | NM_002442:exon7:c.G443A:p.R<br>148Q            | Missense_M<br>utation | COSM432081   |



|       |                           |   |   |                 |                                                |                   |             |
|-------|---------------------------|---|---|-----------------|------------------------------------------------|-------------------|-------------|
| VSCC4 | chr12:123920822-123920822 | C | A | <i>RILPL2</i>   | NM_145058:exon1:c.G146T:p.G49V                 | Missense_Mutation |             |
| VSCC4 | chr13:29674958-29674958   | C | A | <i>MTUS2</i>    | NM_001033602:exon3:c.C2525A:p.P842Q            | Missense_Mutation |             |
| VSCC4 | chr13:45147491-45147491   | C | G | <i>TSC22D1</i>  | NM_183422:exon1:c.G2720C:p.G907A               | Missense_Mutation |             |
| VSCC4 | chr13:95830300-95830300   | G | A | <i>ABCC4</i>    | NM_001301830:exon11:c.C1366T:p.R456W,ABCC4     | Missense_Mutation |             |
| VSCC4 | chr13:103701763-103701763 | C | T | <i>SLC10A2</i>  | NM_000452:exon5:c.G795A:p.Q265Q                | Silent            |             |
| VSCC4 | chr13:109475619-109475619 | A | G | <i>MYO16</i>    | NM_001198950:exon9:c.A1090G:p.S364G,MYO16      | Missense_Mutation |             |
| VSCC4 | chr13:110830507-110830507 | C | T | <i>COL4A1</i>   | NM_001845:exon32:c.G2530A:p.D844N              | Missense_Mutation |             |
| VSCC4 | chr14:55468813-55468813   | G | A | <i>WDHD1</i>    | NM_001008396:exon7:c.C322T:p.Q108X,WDHD1       | Nonsense_Mutation |             |
| VSCC4 | chr14:70924551-70924551   | A | G | <i>ADAM21</i>   | NM_003813:exon2:c.A335G:p.H112R                | Missense_Mutation |             |
| VSCC4 | chr14:102028445-102028445 | C | T | <i>DIO3</i>     | UNKNOWN                                        | unknown           |             |
| VSCC4 | chr14:102499721-102499721 | G | A | <i>DYNC1H1</i>  | NM_001376:exon54:c.G10313A:p.R3438Q            | Missense_Mutation |             |
| VSCC4 | chr14:103371908-103371908 | G | A | <i>TRAF3</i>    | NM_001199427:exon8:c.G1245A:p.L415L,TRAF3      | Silent            |             |
| VSCC4 | chr14:105406145-105406145 | C | T | <i>AHNAK2</i>   | NM_138420:exon7:c.G15643A:p.V5215M             | Missense_Mutation |             |
| VSCC4 | chr14:105684115-105684115 | C | A | <i>BRF1</i>     | NM_001242789:exon10:c.G824T:p.R275L,BRF1       | Missense_Mutation | COSM3887635 |
| VSCC4 | chr15:24923500-24923500   | C | T | <i>NPAPI</i>    | NM_018958:exon1:c.C2486T:p.P829L               | Missense_Mutation |             |
| VSCC4 | chr15:45392035-45392035   | G | A | <i>DUOX2</i>    | NM_014080:exon25:c.C3240T:p.I1080I             | Silent            |             |
| VSCC4 | chr15:75189981-75189981   | C | T | <i>MPI</i>      | NM_001289156:exon7:c.C1032T:p.G344G,MPI        | Silent            |             |
| VSCC4 | chr15:84690343-84690343   | G | A | <i>ADAMTSL3</i> | NM_001301110:exon26:c.G4455A:p.A1485A,ADAMTSL3 | Silent            |             |
| VSCC4 | chr16:1396303-1396303     | G | T | <i>BAIAP3</i>   | NM_001199096:exon24:c.G2326T:p.A776S,BAIAP3    | Missense_Mutation |             |

|       |                         |   |   |                 |                                                 |                       |             |
|-------|-------------------------|---|---|-----------------|-------------------------------------------------|-----------------------|-------------|
| VSCC4 | chr16:1396304-1396304   | C | A | <i>BAIAP3</i>   | NM_001199096:exon24:c.C2327<br>A:p.A776D,BAIAP3 | Missense_M<br>utation |             |
| VSCC4 | chr16:11792107-11792107 | G | A | <i>TXNDC11</i>  | NM_015914:exon7:c.C981T:p.L3<br>27L,TXNDC11     | Silent                | COSM238570  |
| VSCC4 | chr16:20335482-20335482 | T | A | <i>GP2</i>      | NM_001007240:exon3:c.A191T:<br>p.Q64L,GP2       | Missense_M<br>utation |             |
| VSCC4 | chr16:56904076-56904076 | G | T | <i>SLC12A3</i>  | NM_000339:exon5:c.G670T:p.A<br>224S,SLC12A3     | Missense_M<br>utation |             |
| VSCC4 | chr16:68893864-68893864 | G | T | <i>TANGO6</i>   | NM_024562:exon2:c.G172T:p.E5<br>8X              | Nonsense_<br>Mutation |             |
| VSCC4 | chr17:3635727-3635727   | G | A | <i>ITGAE</i>    | NM_002208:exon22:c.C2689T:p.<br>Q897X           | Nonsense_<br>Mutation |             |
| VSCC4 | chr17:7801373-7801373   | G | A | <i>CHD3</i>     | NM_001005271:exon12:c.G2181<br>A:p.M727I,CHD3   | Missense_M<br>utation | COSM4066073 |
| VSCC4 | chr17:27371970-27371970 | G | A | <i>PIPOX</i>    | NM_016518:exon2:c.G208A:p.E<br>70K              | Missense_M<br>utation | COSM124813  |
| VSCC4 | chr17:27594532-27594532 | C | T | <i>NUFIP2</i>   | NM_020772:exon3:c.G2019A:p.<br>W673X            | Nonsense_<br>Mutation | COSM4067977 |
| VSCC4 | chr17:38176148-38176148 | G | A | <i>MED24</i>    | NM_001079518:exon24:c.C2704<br>T:p.R902C,MED24  | Missense_M<br>utation |             |
| VSCC4 | chr17:45669359-45669359 | T | G | <i>NPEPPS</i>   | NM_006310:exon11:c.T1298G:p.<br>F433C           | Missense_M<br>utation |             |
| VSCC4 | chr17:53798348-53798348 | T | G | <i>TMEM100</i>  | NM_018286:exon2:c.A84C:p.E2<br>8D,TMEM100       | Missense_M<br>utation |             |
| VSCC4 | chr17:66397558-66397558 | C | T | <i>ARSG</i>     | NM_001267727:exon11:c.C1270<br>T:p.R424C,ARSG   | Missense_M<br>utation |             |
| VSCC4 | chr17:73517963-73517963 | C | T | <i>TSEN54</i>   | NM_207346:exon8:c.C801T:p.S2<br>67S             | Silent                |             |
| VSCC4 | chr17:79139763-79139763 | G | A | <i>AATK</i>     | NM_001080395:exon1:c.C30T:p.<br>F10F            | Silent                |             |
| VSCC4 | chr17:79166369-79166369 | C | T | <i>CEP131</i>   | NM_001009811:exon19:c.G2346<br>A:p.L782L,CEP131 | Silent                |             |
| VSCC4 | chr18:31324450-31324450 | A | T | <i>ASXL3</i>    | NM_030632:exon12:c.A4638T:p.<br>K1546N          | Missense_M<br>utation |             |
| VSCC4 | chr18:33552865-33552865 | C | T | <i>C18orf21</i> | NM_001201476:exon2:c.C95T:p.<br>S32L,C18orf21   | Missense_M<br>utation |             |

|       |                         |   |   |               |                                           |                   |             |
|-------|-------------------------|---|---|---------------|-------------------------------------------|-------------------|-------------|
| VSCC4 | chr18:47107918-47107918 | G | C | <i>LIPG</i>   | NM_001308006:exon5:c.G705C:p.L235L,LIPG   | Silent            |             |
| VSCC4 | chr18:55217995-55217995 | G | C | <i>FECH</i>   | NM_000140:exon11:c.C1221G:p.V407V,FECH    | Silent            | COSM4979209 |
| VSCC4 | chr18:76755310-76755310 | C | T | <i>SALL3</i>  | NM_171999:exon2:c.C3319T:p.R1107C         | Missense_Mutation |             |
| VSCC4 | chr19:919509-919509     | G | A | <i>KISS1R</i> | NM_032551:exon3:c.G389A:p.C130Y           | Missense_Mutation |             |
| VSCC4 | chr19:2994034-2994034   | G | A | <i>TLE6</i>   | NM_024760:exon15:c.G1186A:p.V396I,TLE6    | Missense_Mutation |             |
| VSCC4 | chr19:6754880-6754880   | C | A | <i>SH2D3A</i> | NM_005490:exon5:c.G943T:p.G315W           | Missense_Mutation |             |
| VSCC4 | chr19:8464809-8464809   | G | A | <i>RAB11B</i> | NM_004218:exon2:c.G103A:p.E35K            | Missense_Mutation |             |
| VSCC4 | chr19:9056399-9056399   | A | T | <i>MUC16</i>  | NM_024690:exon3:c.T31047A:p.H10349Q       | Missense_Mutation | COSM3772502 |
| VSCC4 | chr19:9085626-9085626   | A | T | <i>MUC16</i>  | NM_024690:exon1:c.T6189A:p.T2063T         | Silent            | COSM3530413 |
| VSCC4 | chr19:10476501-10476501 | G | A | <i>TYK2</i>   | NM_003331:exon7:c.C703T:p.R235W           | Missense_Mutation |             |
| VSCC4 | chr19:11473212-11473212 | C | T | <i>PLPPR2</i> | NM_001170635:exon7:c.C612T:p.R204R,PLPPR2 | Silent            |             |
| VSCC4 | chr19:17720841-17720841 | G | A | <i>UNC13A</i> | NM_001080421:exon41:c.C4719T:p.I1573I     | Silent            |             |
| VSCC4 | chr19:22271472-22271472 | A | C | <i>ZNF257</i> | NM_001316998:exon2:c.A692C:p.K231T,ZNF257 | Missense_Mutation |             |
| VSCC4 | chr19:45322933-45322933 | G | A | <i>BCAM</i>   | NM_001013257:exon13:c.G1713A:p.V571V,BCAM | Silent            |             |
| VSCC4 | chr19:45917282-45917282 | C | T | <i>ERCC1</i>  | NM_202001:exon7:c.G713A:p.C238Y,ERCC1     | Missense_Mutation | COSM1395277 |
| VSCC4 | chr19:47111760-47111760 | C | A | <i>CALM3</i>  | NM_005184:exon4:c.C200A:p.P67Q            | Missense_Mutation |             |
| VSCC4 | chr19:49132243-49132243 | G | A | <i>SPHK2</i>  | NM_001204160:exon6:c.G1070A:p.S357N,SPHK2 | Missense_Mutation | COSM1002538 |
| VSCC4 | chr19:50100890-50100890 | G | A | <i>PRR12</i>  | NM_020719:exon4:c.G3298A:p.E1100K         | Missense_Mutation |             |

|       |                          |   |   |                |                                                |                    |             |
|-------|--------------------------|---|---|----------------|------------------------------------------------|--------------------|-------------|
| VSCC4 | chr19:58384891-58384891  | G | A | <i>ZNF814</i>  | NM_001144989:exon3:c.C1867T<br>:p.Q623X        | Nonsense_ Mutation |             |
| VSCC4 | chr19:58438212-58438212  | C | T | <i>ZNF418</i>  | NM_001317030:exon2:c.G1082A<br>:p.R361Q,ZNF418 | Missense_Mutation  |             |
| VSCC4 | chr19:58908365-58908365  | G | A | <i>RNF225</i>  | NM_001195135:exon1:c.G909A:<br>p.S303S         | Silent             | COSM4827777 |
| VSCC4 | chr20:9351933-9351933    | C | A | <i>PLCB4</i>   | NM_000933:exon7:c.C576A:p.P1<br>92P,PLCB4      | Silent             |             |
| VSCC4 | chr20:11904213-11904213  | C | T | <i>BTBD3</i>   | NM_001282552:exon4:c.C1015T<br>:p.Q339X,BTBD3  | Nonsense_ Mutation |             |
| VSCC4 | chr20:25656944-25656944  | C | T | <i>ZNF337</i>  | NM_001290261:exon4:c.G980A:<br>p.R327Q,ZNF337  | Missense_Mutation  |             |
| VSCC4 | chr21:30330856-30330856  | G | A | <i>LTN1</i>    | NM_015565:exon14:c.C2737T:p.<br>L913F          | Missense_Mutation  |             |
| VSCC4 | chr21:33044551-33044551  | G | A | <i>SCAF4</i>   | NM_001145444:exon19:c.C2560<br>T:p.H854Y,SCAF4 | Missense_Mutation  |             |
| VSCC4 | chr21:42551257-42551257  | G | A | <i>PLAC4</i>   | NM_182832:exon1:c.C299T:p.S1<br>00L            | Missense_Mutation  |             |
| VSCC4 | chr22:29141945-29141945  | G | A | <i>HSCB</i>    | NM_172002:exon4:c.G517A:p.A<br>173T            | Missense_Mutation  |             |
| VSCC4 | chr22:38882306-38882306  | G | A | <i>DDX17</i>   | NM_001098504:exon13:c.C1830<br>T:p.T610T,DDX17 | Silent             |             |
| VSCC4 | chrX:27765614-27765614   | G | A | <i>DCAF8L2</i> | NM_001136533:exon1:c.G602A:<br>p.R201H         | Missense_Mutation  |             |
| VSCC4 | chrX:30255049-30255049   | C | T | <i>MAGEB3</i>  | NM_002365:exon5:c.C1008T:p.S<br>336S           | Silent             |             |
| VSCC4 | chrX:30872989-30872989   | G | T | <i>TAB3</i>    | NM_152787:exon6:c.C793A:p.P2<br>65T            | Missense_Mutation  | COSM1126149 |
| VSCC4 | chrX:37545386-37545386   | G | A | <i>XK</i>      | NM_021083:exon1:c.G172A:p.V<br>58I             | Missense_Mutation  |             |
| VSCC4 | chrX:85166298-85166298   | T | C | <i>CHM</i>     | NM_000390:exon9:c.A1212G:p.<br>V404V           | Silent             |             |
| VSCC4 | chrX:106844747-106844747 | G | T | <i>FRMPD3</i>  | NM_032428:exon16:c.G3577T:p.<br>G1193C         | Missense_Mutation  |             |
| VSCC4 | chrX:117033290-117033290 | G | C | <i>KLHL13</i>  | NM_001168300:exon7:c.C1531G<br>:p.Q511E,KLHL13 | Missense_Mutation  |             |

|        |                           |   |   |                |                                            |                   |               |
|--------|---------------------------|---|---|----------------|--------------------------------------------|-------------------|---------------|
| VSCC4  | chrX:135618241-135618241  | C | T | <i>VGLLI1</i>  | NM_016267:exon2:c.C62T:p.T21 M             | Missense_Mutation |               |
| VSCC4  | chrX:147090167-147090167  | C | T | <i>FMR1NB</i>  | NM_152578:exon4:c.C568T:p.L190F            | Missense_Mutation |               |
| VSCC4  | chrX:153762287-153762287  | C | T | <i>G6PD</i>    | NM_000402:exon7:c.G823A:p.G275S,G6PD       | Missense_Mutation |               |
| VSCC4  | chr11:108593812-108593812 | G | A | <i>DDX10</i>   | NM_004398:exon13:c.G1588A:p.D530N          | Missense_Mutation | <i>DDX10</i>  |
| VSCC4  | chr22:41574264-41574264   | G | A | <i>EP300</i>   | NM_001429:exon31:c.G6549A:p.L2183L         | Silent            | <i>EP300</i>  |
| VSCC4  | chr1:51946949-51946949    | C | G | <i>EPS15</i>   | NM_001981:exon2:c.G71C:p.R24T              | Missense_Mutation | <i>EPS15</i>  |
| VSCC4  | chr2:24914466-24914466    | C | T | <i>NCOA1</i>   | NM_003743:exon7:c.C649T:p.R217C,NCOA1      | Missense_Mutation | <i>NCOA1</i>  |
| VSCC4  | chr8:32621592-32621592    | A | G | <i>NRG1</i>    | NM_013957:exon12:c.A1586G:p.E529G,NRG1     | Missense_Mutation | <i>NRG1</i>   |
| VSCC4  | chr3:178936091-178936091  | G | A | <i>PIK3CA</i>  | NM_006218:exon10:c.G1633A:p.E545K          | Missense_Mutation | <i>PIK3CA</i> |
| VSCC4  | chr17:38510737-38510737   | G | A | <i>RARA</i>    | NM_001145302:exon5:c.G700A:p.A234T,RARA    | Missense_Mutation | <i>RARA</i>   |
| VSCC4  | chr16:72993621-72993621   | A | T | <i>ZFH3</i>    | NM_006885:exon2:c.T424A:p.Y142N            | Missense_Mutation | <i>ZFH3</i>   |
| VSCC13 | chr1:985925-985925        | C | T | <i>AGRN</i>    | NM_198576:exon29:c.C5095T:p.R1699C         | Missense_Mutation |               |
| VSCC13 | chr1:78163072-78163072    | G | A | <i>USP33</i>   | NM_201624:exon24:c.C2666T:p.P889L,USP33    | Missense_Mutation | COSM4672021   |
| VSCC13 | chr1:86952403-86952403    | G | A | <i>CLCA1</i>   | NM_001285:exon7:c.G1149A:p.T383T           | Silent            |               |
| VSCC13 | chr1:103343642-103343642  | A | G | <i>COL11A1</i> | NM_080630:exon65:c.T5006C:p.I1669T,COL11A1 | Missense_Mutation |               |
| VSCC13 | chr1:153177269-153177269  | C | T | <i>LELP1</i>   | NM_001010857:exon2:c.C86T:p.S29F           | Missense_Mutation | COSM3300085   |
| VSCC13 | chr1:156641484-156641484  | C | T | <i>NES</i>     | NM_006617:exon4:c.G2496A:p.A832A           | Silent            |               |
| VSCC13 | chr1:161161901-161161901  | C | T | <i>ADAMTS4</i> | NM_005099:exon8:c.G2041A:p.D681N           | Missense_Mutation | COSM3933513   |

|        |                          |   |   |                |                                             |                   |             |
|--------|--------------------------|---|---|----------------|---------------------------------------------|-------------------|-------------|
| VSCC13 | chr1:247587439-247587439 | A | G | <i>NLRP3</i>   | NM_001127462:exon3:c.A694G:p.K232E,NLRP3    | Missense_Mutation |             |
| VSCC13 | chr2:20101534-20101534   | C | T | <i>TTC32</i>   | NM_001008237:exon1:c.G82A:p.E28K            | Missense_Mutation |             |
| VSCC13 | chr2:54858362-54858362   | G | A | <i>SPTBN1</i>  | NM_178313:exon15:c.G3139A:p.E1047K,SPTBN1   | Missense_Mutation |             |
| VSCC13 | chr2:98928376-98928376   | A | C | <i>VWA3B</i>   | NM_144992:exon27:c.A3616C:p.R1206R          | Silent            |             |
| VSCC13 | chr2:149806840-149806840 | C | A | <i>KIF5C</i>   | NM_004522:exon10:c.C832A:p.P278T            | Missense_Mutation |             |
| VSCC13 | chr2:159170315-159170315 | G | T | <i>CCDC148</i> | NM_001301684:exon6:c.C418A:p.L140M,CCDC148  | Missense_Mutation | COSM5554852 |
| VSCC13 | chr2:160027037-160027037 | C | T | <i>TANC1</i>   | NM_001145909:exon10:c.C1048T;p.R350X,TANC1  | Nonsense_Mutation |             |
| VSCC13 | chr2:164466968-164466968 | G | A | <i>FIGN</i>    | NM_018086:exon3:c.C1374T:p.D458D            | Silent            |             |
| VSCC13 | chr2:206610584-206610584 | C | T | <i>NRP2</i>    | NM_003872:exon10:c.C1756T:p.R586W,NRP2      | Missense_Mutation | COSM5742968 |
| VSCC13 | chr2:207834016-207834016 | G | A | <i>CPO</i>     | NM_173077:exon9:c.G981A:p.Q327Q             | Silent            |             |
| VSCC13 | chr3:98771111-98771111   | G | A | <i>TTLL3</i>   | NM_001025930:exon13:c.G2686A:p.V896I        | Missense_Mutation |             |
| VSCC13 | chr3:12977981-12977981   | C | T | <i>IQSEC1</i>  | NM_001134382:exon3:c.G535A:p.E179K,IQSEC1   | Missense_Mutation |             |
| VSCC13 | chr3:27436202-27436202   | G | A | <i>SLC4A7</i>  | NM_001258379:exon19:c.C2540T;p.S847F,SLC4A7 | Missense_Mutation |             |
| VSCC13 | chr3:39544326-39544326   | C | T | <i>MOBP</i>    | NM_001278323:exon2:c.C507T:p.G169G,MOBP     | Silent            |             |
| VSCC13 | chr3:48205916-48205916   | G | A | <i>CDC25A</i>  | NM_201567:exon12:c.C1083T:p.N361N,CDC25A    | Silent            |             |
| VSCC13 | chr3:49756553-49756553   | G | C | <i>AMIGO3</i>  | NM_198722:exon1:c.C346G:p.L116V             | Missense_Mutation |             |
| VSCC13 | chr3:56628021-56628021   | C | T | <i>CCDC66</i>  | NM_001012506:exon10:c.C1267T;p.R423X,CCDC66 | Nonsense_Mutation |             |
| VSCC13 | chr3:77657088-77657088   | G | A | <i>ROBO2</i>   | NM_002942:exon21:c.G3276A:p.V1092V,ROBO2    | Silent            | COSM5011333 |

|        |                          |   |   |                 |                                            |                   |             |
|--------|--------------------------|---|---|-----------------|--------------------------------------------|-------------------|-------------|
| VSCC13 | chr3:130463629-130463629 | C | A | <i>PIK3R4</i>   | NM_014602:exon2:c.G434T:p.R145L            | Missense_Mutation |             |
| VSCC13 | chr3:165547955-165547955 | G | C | <i>BCHE</i>     | NM_000055:exon2:c.C867G:p.I289M            | Missense_Mutation |             |
| VSCC13 | chr4:2933873-2933873     | G | C | <i>MFSD10</i>   | NM_001120:exon6:c.C701G:p.S234C,MFSD10     | Missense_Mutation |             |
| VSCC13 | chr4:6711348-6711348     | G | A | <i>MRFAP1L1</i> | NM_203462:exon1:c.C9T:p.P3P                | Silent            | COSM1721723 |
| VSCC13 | chr4:24839005-24839005   | G | C | <i>CCDC149</i>  | NM_001130726:exon6:c.C507G:p.H169Q,CCDC149 | Missense_Mutation |             |
| VSCC13 | chr4:114290839-114290839 | G | A | <i>ANK2</i>     | NM_020977:exon42:c.G5233A:p.E1745K,ANK2    | Missense_Mutation |             |
| VSCC13 | chr4:122261628-122261628 | G | A | <i>QRFPR</i>    | NM_198179:exon2:c.C478T:p.R160X            | Nonsense_Mutation |             |
| VSCC13 | chr4:134071786-134071786 | A | T | <i>PCDH10</i>   | NM_020815:exon1:c.A491T:p.N164I,PCDH10     | Missense_Mutation |             |
| VSCC13 | chr4:155411059-155411059 | G | A | <i>DCHS2</i>    | NM_001142552:exon1:c.C1449T:p.G483G        | Silent            |             |
| VSCC13 | chr5:9063080-9063080     | T | G | <i>SEMA5A</i>   | NM_003966:exon18:c.A2437C:p.N813H          | Missense_Mutation | COSM5019352 |
| VSCC13 | chr5:39119663-39119663   | C | T | <i>FYB</i>      | NM_199335:exon14:c.G2074A:p.E692K,FYB      | Missense_Mutation |             |
| VSCC13 | chr5:140772972-140772972 | C | T | <i>PCDHGA8</i>  | NM_014004:exon1:c.C592T:p.R198C,PCDHGA8    | Missense_Mutation |             |
| VSCC13 | chr5:172661909-172661909 | C | G | <i>NKX2-5</i>   | NM_001166175:exon1:c.G178C:p.E60Q,NKX2-5   | Missense_Mutation | COSM5650008 |
| VSCC13 | chr5:179302955-179302955 | C | T | <i>TBC1D9B</i>  | NM_015043:exon11:c.G1865A:p.R622H,TBC1D9B  | Missense_Mutation |             |
| VSCC13 | chr6:31324711-31324711   | A | G | <i>HLA-B</i>    | NM_005514:exon2:c.T97C:p.Y33H              | Missense_Mutation |             |
| VSCC13 | chr6:135358645-135358645 | A | T | <i>HBS1L</i>    | NM_001145207:exon5:c.T950A:p.L317X         | Nonsense_Mutation |             |
| VSCC13 | chr7:6084211-6084211     | G | A | <i>EIF2AK1</i>  | NM_001134335:exon7:c.C712T:p.H238Y,EIF2AK1 | Missense_Mutation | COSM4983513 |
| VSCC13 | chr7:80427458-80427458   | G | A | <i>SEMA3C</i>   | NM_006379:exon11:c.C1081T:p.H361Y          | Missense_Mutation |             |
| VSCC13 | chr7:150707360-150707360 | G | T | <i>NOS3</i>     | NM_000603:exon21:c.G2670T:p.L890L          | Silent            |             |

|        |                           |   |   |        |                                              |                   |             |
|--------|---------------------------|---|---|--------|----------------------------------------------|-------------------|-------------|
| VSCC13 | chr8:39564402-39564402    | G | A | ADAM18 | NM_014237:exon18:c.G1996A:p.D666N            | Missense_Mutation |             |
| VSCC13 | chr8:97156914-97156914    | G | T | GDF6   | NM_001001557:exon2:c.C1245A:p.T415T          | Silent            |             |
| VSCC13 | chr8:98155314-98155314    | C | G | CPQ    | NM_016134:exon8:c.C1322G:p.T441S             | Missense_Mutation |             |
| VSCC13 | chr16:3823797-3823797     | C | T | CREBBP | NM_001079846:exon12:c.G2304A:p.M768I,CREBBP  | Missense_Mutation | CREBBP      |
| VSCC13 | chr9:139617901-139617901  | C | T | FAM69B | NM_152421:exon5:c.C971T:p.T324I              | Missense_Mutation | COSM3382790 |
| VSCC13 | chr10:16979759-16979759   | C | T | CUBN   | NM_001081:exon39:c.G5758A:p.A1920T           | Missense_Mutation |             |
| VSCC13 | chr10:105166424-105166424 | C | T | PDCD11 | NM_014976:exon7:c.C747T:p.N249N              | Silent            |             |
| VSCC13 | chr10:112764462-112764462 | C | G | SHOC2  | NM_001269039:exon3:c.C933G:p.I311M,SHOC2     | Missense_Mutation |             |
| VSCC13 | chr11:60543131-60543131   | G | C | MS4A15 | NM_001278242:exon6:c.G543C:p.P181P,MS4A15    | Silent            |             |
| VSCC13 | chr11:62296271-62296271   | G | A | AHNAK  | NM_001620:exon5:c.C5618T:p.A1873V            | Missense_Mutation |             |
| VSCC13 | chr11:118521157-118521157 | G | A | PHLDB1 | NM_001144759:exon19:c.G3638A:p.R1213H,PHLDB1 | Missense_Mutation |             |
| VSCC13 | chr12:7356036-7356036     | C | T | PEX5   | NM_001131024:exon9:c.C744T:p.V248V,PEX5      | Silent            |             |
| VSCC13 | chr12:117348932-117348932 | G | T | FBXW8  | NM_012174:exon1:c.G90T:p.E30D,FBXW8          | Missense_Mutation |             |
| VSCC13 | chr12:122097098-122097098 | G | A | MORN3  | NM_173855:exon2:c.C302T:p.S101L              | Missense_Mutation |             |
| VSCC13 | chr13:23914029-23914029   | G | A | SACS   | NM_001278055:exon8:c.C3545T:p.S1182L,SACS    | Missense_Mutation |             |
| VSCC13 | chr14:24658773-24658773   | G | A | TM9SF1 | NM_001289006:exon6:c.C1408T:p.R470C,TM9SF1   | Missense_Mutation |             |
| VSCC13 | chr14:33004784-33004784   | C | T | AKAP6  | NM_004274:exon3:c.C349T:p.H117Y              | Missense_Mutation |             |
| VSCC13 | chr14:33014758-33014758   | C | G | AKAP6  | NM_004274:exon4:c.C899G:p.S300X              | Nonsense_Mutation |             |



|        |                         |   |   |                 |                                            |                   |             |
|--------|-------------------------|---|---|-----------------|--------------------------------------------|-------------------|-------------|
| VSCC13 | chr14:53020081-53020081 | C | A | <i>GPR137C</i>  | NM_001099652:exon1:c.C216A:p.L72L          | Silent            |             |
| VSCC13 | chr14:55655776-55655776 | C | T | <i>DLGAP5</i>   | NM_001146015:exon2:c.G122A:p.R41Q,DLGAP5   | Missense_Mutation |             |
| VSCC13 | chr14:70517820-70517820 | G | A | <i>SLC8A3</i>   | NM_182936:exon3:c.C107T:p.T36M,SLC8A3      | Missense_Mutation | COSM3496446 |
| VSCC13 | chr16:11375062-11375062 | G | A | <i>PRM1</i>     | NM_002761:exon1:c.C34T:p.R12W              | Missense_Mutation |             |
| VSCC13 | chr16:68331199-68331199 | G | A | <i>SLC7A6</i>   | NM_003983:exon11:c.G1516A:p.E506K,SLC7A6   | Missense_Mutation |             |
| VSCC13 | chr16:68596898-68596898 | A | G | <i>ZFP90</i>    | NM_001305206:exon5:c.A263G:p.Y88C,ZFP90    | Missense_Mutation |             |
| VSCC13 | chr17:7604781-7604781   | G | A | <i>WRAP53</i>   | NM_018081:exon5:c.G736A:p.A246T,WRAP53     | Missense_Mutation |             |
| VSCC13 | chr17:39240560-39240560 | T | C | <i>KRTAP4-7</i> | NM_033061:exon1:c.T102C:p.C34C             | Silent            |             |
| VSCC13 | chr17:40042457-40042457 | G | A | <i>ACLY</i>     | NM_001303275:exon17:c.C2112T:p.V704V,ACLY  | Silent            |             |
| VSCC13 | chr17:40966006-40966006 | C | T | <i>BECN1</i>    | NM_001314000:exon8:c.G773A:p.G258E,BECN1   | Missense_Mutation |             |
| VSCC13 | chr17:61498313-61498313 | G | A | <i>TANC2</i>    | NM_025185:exon25:c.G4970A:p.R1657Q         | Missense_Mutation | COSM979038  |
| VSCC13 | chr17:62041069-62041069 | G | A | <i>SCN4A</i>    | NM_000334:exon10:c.C1569T:p.S523S          | Silent            |             |
| VSCC13 | chr17:72480264-72480264 | A | G | <i>CD300A</i>   | NM_001256841:exon6:c.A560G:p.X187W,CD300A  | Nonsense_Mutation |             |
| VSCC13 | chr18:76753977-76753977 | G | A | <i>SALL3</i>    | NM_171999:exon2:c.G1986A:p.S662S           | Silent            |             |
| VSCC13 | chr19:1257006-1257006   | G | A | <i>MIDN</i>     | NM_177401:exon8:c.G1142A:p.R381Q           | Missense_Mutation |             |
| VSCC13 | chr19:10571734-10571734 | G | A | <i>PDE4A</i>    | NM_006202:exon6:c.G703A:p.D235N,PDE4A      | Missense_Mutation |             |
| VSCC13 | chr19:18649222-18649222 | G | A | <i>FKBP8</i>    | NM_001308373:exon5:c.C573T:p.H191H,FKBP8   | Silent            | COSM5034615 |
| VSCC13 | chr19:21240516-21240516 | C | T | <i>ZNF430</i>   | NM_001172671:exon5:c.C1399T:p.R467W,ZNF430 | Missense_Mutation | COSM1215079 |

|        |                          |   |   |                 |                                             |                   |              |
|--------|--------------------------|---|---|-----------------|---------------------------------------------|-------------------|--------------|
| VSCC13 | chr19:41700560-41700560  | G | C | <i>CYP2S1</i>   | NM_030622:exon2:c.G289C:p.E97Q              | Missense_Mutation | COSM2812452  |
| VSCC13 | chr19:49469553-49469553  | G | C | <i>FTL</i>      | NM_000146:exon3:c.G265C:p.E89Q              | Missense_Mutation |              |
| VSCC13 | chr21:32638875-32638875  | G | A | <i>TIAMI</i>    | NM_003253:exon5:c.C414T:p.D138D             | Silent            | COSM4076139  |
| VSCC13 | chr21:33368178-33368178  | C | G | <i>HUNK</i>     | NM_014586:exon10:c.C1403G:p.S468X           | Nonsense_Mutation |              |
| VSCC13 | chr21:35201962-35201962  | C | T | <i>ITSN1</i>    | NM_001001132:exon27:c.C3264T:p.T1088T,ITSN1 | Silent            |              |
| VSCC13 | chr22:19371199-19371199  | C | G | <i>HIRA</i>     | NM_003325:exon13:c.G1359C:p.R453R           | Silent            |              |
| VSCC13 | chr22:38622845-38622845  | G | T | <i>TMEM184B</i> | NM_001195071:exon6:c.C558A:p.L186L,TMEM184B | Silent            |              |
| VSCC13 | chr22:50307406-50307406  | C | T | <i>ALG12</i>    | NM_024105:exon2:c.G8A:p.G3E                 | Missense_Mutation |              |
| VSCC13 | chrX:68725645-68725645   | C | T | <i>FAM155B</i>  | NM_015686:exon1:c.C520T:p.R174C             | Missense_Mutation |              |
| VSCC13 | chrX:135494493-135494493 | G | T | <i>ADGRG4</i>   | NM_153834:exon24:c.G9005T:p.C3002F          | Missense_Mutation |              |
| VSCC13 | chr4:187532590-187532590 | G | T | <i>FAT1</i>     | NM_005245:exon14:c.C9803A:p.S3268X          | Nonsense_Mutation | <i>FAT1</i>  |
| VSCC13 | chr4:187549878-187549878 | G | A | <i>FAT1</i>     | NM_005245:exon8:c.C4363T:p.Q1455X           | Nonsense_Mutation | <i>FAT1</i>  |
| VSCC13 | chr7:75203182-75203182   | C | T | <i>HIP1</i>     | NM_001243198:exon8:c.G629A:p.R210H,HIP1     | Missense_Mutation | <i>HIP1</i>  |
| VSCC13 | chr11:534289-534289      | C | T | <i>HRAS</i>     | NM_001130442:exon2:c.G34A:p.G12S,HRAS       | Missense_Mutation | <i>HRAS</i>  |
| VSCC13 | chr7:151970951-151970951 | C | T | <i>KMT2C</i>    | NM_170606:exon7:c.G851A:p.R284Q             | Missense_Mutation | <i>KMT2C</i> |
| VSCC13 | chr2:141473652-141473652 | A | T | <i>LRP1B</i>    | NM_018557:exon37:c.T5913A:p.D1971E          | Missense_Mutation | <i>LRP1B</i> |
| VSCC13 | chr3:158320697-158320697 | G | C | <i>MLF1</i>     | NM_001130156:exon6:c.G595C:p.E199Q,MLF1     | Missense_Mutation | <i>MLF1</i>  |
| VSCC13 | chr16:15917266-15917266  | C | T | <i>MYH11</i>    | NM_001040113:exon3:c.G348A:p.T116T,MYH11    | Silent            | <i>MYH11</i> |

|        |                           |                                         |   |                  |                                                     |                   |               |             |
|--------|---------------------------|-----------------------------------------|---|------------------|-----------------------------------------------------|-------------------|---------------|-------------|
| VSCC13 | chr22:30069309-30069309   | G                                       | A | <i>NF2</i>       | NM_181830:exon10:c.G925A:p.E309K,NF2                | Missense_Mutation | <i>NF2</i>    |             |
| VSCC13 | chr9:139414012-139414012  | T                                       | G | <i>NOTCH1</i>    | NM_017617:exon5:c.A748C:p.T250P                     | Missense_Mutation | <i>NOTCH1</i> |             |
| VSCC13 | chr9:139414013-139414013  | G                                       | T | <i>NOTCH1</i>    | NM_017617:exon5:c.C747A:p.F249L                     | Missense_Mutation | <i>NOTCH1</i> |             |
| VSCC13 | chr9:139414014-139414014  | A                                       | C | <i>NOTCH1</i>    | NM_017617:exon5:c.T746G:p.F249C                     | Missense_Mutation | <i>NOTCH1</i> |             |
| VSCC13 | chr3:12653559-12653559    | G                                       | C | <i>RAF1</i>      | NM_002880:exon3:c.C210G:p.V70V                      | Silent            | <i>RAF1</i>   | COSM5787409 |
| VSCC13 | chr10:102891414-102891414 | G                                       | A | <i>TLX1</i>      | NM_001195517:exon1:c.G116A:p.R39H,TLX1              | Missense_Mutation | <i>TLX1</i>   |             |
| VSCC13 | chr19:54080532-54080532   | G                                       | A | <i>ZNF331</i>    | NM_001253801:exon5:c.G718A:p.E240K,ZNF331           | Missense_Mutation | <i>ZNF331</i> |             |
| VSCC13 | chr2:202149961-202149962  | TG                                      | - | <i>CASP8</i>     | NM_033356:exon7:c.1180_1181del:p.C394fs,CASP8       | Frame_Shift_Del   | <i>CASP8</i>  |             |
| VSCC13 | chr11:95825375-95825383   | TGCTGCTGC                               | - | <i>MAML2</i>     | NM_032427:exon2:c.1812_1820del:p.604_607del         | In_Frame_Del      | <i>MAML2</i>  |             |
| VSCC13 | chr9:139412604-139412606  | CCA                                     | - | <i>NOTCH1</i>    | NM_017617:exon7:c.1238_1240del:p.413_414del         | In_Frame_Del      | <i>NOTCH1</i> |             |
| VSCC13 | chr1:111957502-111957525  | TCACAGACT<br>GATGACTC<br>ACAGGGG        | - | <i>OVGP1</i>     | NM_002557:exon11:c.1598_1621del:p.533_541del        | In_Frame_Del      |               |             |
| VSCC13 | chr4:88537298-88537306    | AGCAGCGA<br>T                           | - | <i>DSPP</i>      | NM_014208:exon5:c.3484_3492del:p.1162_1164del       | In_Frame_Del      |               | COSM3677731 |
| VSCC13 | chr8:103573011-103573037  | TGCAACCCC<br>TGCAACCCC<br>TGCAACCC<br>G | - | <i>ODF1</i>      | NM_024410:exon2:c.652_678del:p.218_226del           | In_Frame_Del      |               |             |
| VSCC13 | chr12:7045892-7045915     | CAGCAGCA<br>GCAGCAGC<br>AGCAGCAG        | - | <i>ATN1</i>      | NM_001007026:exon5:c.1462_1485del:p.488_495del,ATN1 | In_Frame_Del      |               |             |
| VSCC13 | chrX:24382508-24382525    | CTGCTCCTG<br>CTCCTGCCG                  | - | <i>SUPT20HLI</i> | NM_001136234:exon1:c.1631_1648del:p.544_550del      | In_Frame_Del      |               |             |
| VSCC14 | chr5:112179733-112179733  | G                                       | C | <i>APC</i>       | NM_001127511:exon14:c.G8388C:p.K2796N,APC           | Missense_Mutation | <i>APC</i>    |             |

|        |                         |   |   |                |                                              |                   |               |
|--------|-------------------------|---|---|----------------|----------------------------------------------|-------------------|---------------|
| VSCC14 | chr9:21971108-21971108  | C | A | <i>CDKN2A</i>  | NM_000077:exon2:c.G250T:p.D84Y,CDKN2A        | Missense_Mutation | <i>CDKN2A</i> |
| VSCC14 | chr4:54876281-54876281  | G | A | <i>CHIC2</i>   | NM_012110:exon6:c.C479T:p.P160L              | Missense_Mutation | <i>CHIC2</i>  |
| VSCC14 | chr17:48270014-48270014 | G | A | <i>COL1A1</i>  | NM_000088:exon28:c.C1916T:p.S639F            | Missense_Mutation | <i>COL1A1</i> |
| VSCC14 | chr16:3781372-3781372   | C | T | <i>CREBBP</i>  | NM_001079846:exon29:c.G4879A:p.D1627N,CREBBP | Missense_Mutation | <i>CREBBP</i> |
| VSCC14 | chr1:6662020-6662020    | C | G | <i>KLHL21</i>  | NM_014851:exon1:c.G858C:p.E286D              | Missense_Mutation |               |
| VSCC14 | chr1:16270190-16270190  | G | A | <i>ZBTB17</i>  | NM_001242884:exon10:c.C1234T:p.R412W,ZBTB17  | Missense_Mutation |               |
| VSCC14 | chr1:19215911-19215911  | G | A | <i>ALDH4A1</i> | NM_001161504:exon3:c.C14T:p.P5L,ALDH4A1      | Missense_Mutation |               |
| VSCC14 | chr1:21226277-21226277  | C | G | <i>EIF4G3</i>  | NM_003760:exon11:c.G1744C:p.E582Q,EIF4G3     | Missense_Mutation |               |
| VSCC14 | chr1:21551857-21551857  | G | A | <i>ECE1</i>    | NM_001113347:exon15:c.C1890T:p.T630T,ECE1    | Silent            |               |
| VSCC14 | chr1:31346211-31346211  | G | A | <i>SDC3</i>    | NM_014654:exon5:c.C1176T:p.G392G             | Silent            |               |
| VSCC14 | chr1:32673006-32673006  | G | A | <i>IQCC</i>    | NM_001160042:exon5:c.G964A:p.E322K,IQCC      | Missense_Mutation | COSM896560    |
| VSCC14 | chr1:32790085-32790085  | G | T | <i>HDAC1</i>   | NM_004964:exon4:c.G286T:p.V96F               | Missense_Mutation |               |
| VSCC14 | chr1:34006146-34006146  | C | T | <i>CSMD2</i>   | NM_052896:exon59:c.G9178A:p.G3060R,CSMD2     | Missense_Mutation | COSM5641210   |
| VSCC14 | chr1:35227466-35227466  | A | C | <i>GJB4</i>    | NM_153212:exon2:c.A611C:p.E204A              | Missense_Mutation |               |
| VSCC14 | chr1:35321458-35321458  | G | A | <i>SMIM12</i>  | NM_001164825:exon2:c.C121T:p.Q41X,SMIM12     | Nonsense_Mutation |               |
| VSCC14 | chr1:36904478-36904478  | C | T | <i>OSCP1</i>   | NM_145047:exon2:c.G146A:p.R49K,OSCP1         | Missense_Mutation |               |
| VSCC14 | chr1:40349014-40349014  | C | T | <i>TRIT1</i>   | NM_001312691:exon1:c.G150A:p.E50E,TRIT1      | Silent            |               |
| VSCC14 | chr1:42905687-42905687  | C | T | <i>ZMYND12</i> | NM_001146192:exon3:c.G104A:p.R35Q,ZMYND12    | Missense_Mutation | COSM4944510   |

|        |                          |   |   |                |                                                 |                       |             |
|--------|--------------------------|---|---|----------------|-------------------------------------------------|-----------------------|-------------|
| VSCC14 | chr1:48771547-48771547   | C | G | <i>SPATA6</i>  | NM_001286239:exon11:c.G1156<br>C:p.E386Q,SPATA6 | Missense_M<br>utation |             |
| VSCC14 | chr1:54606803-54606803   | C | G | <i>CDCP2</i>   | NM_201546:exon3:c.G731C:p.G<br>244A             | Missense_M<br>utation | COSM4419764 |
| VSCC14 | chr1:55253437-55253437   | C | T | <i>TTC22</i>   | NM_001114108:exon3:c.G686A:<br>p.R229H,TTC22    | Missense_M<br>utation |             |
| VSCC14 | chr1:62739198-62739198   | G | A | <i>KANK4</i>   | NM_181712:exon3:c.C1578T:p.S<br>526S            | Silent                |             |
| VSCC14 | chr1:62910554-62910554   | G | C | <i>USP1</i>    | NM_001017415:exon6:c.G703C:<br>p.E235Q,USP1     | Missense_M<br>utation | COSM1748246 |
| VSCC14 | chr1:71532546-71532546   | G | T | <i>ZRANB2</i>  | NM_005455:exon9:c.C842A:p.P2<br>81H,ZRANB2      | Missense_M<br>utation |             |
| VSCC14 | chr1:75172036-75172036   | G | A | <i>CRYZ</i>    | NM_001134759:exon7:c.C523T:<br>p.H175Y,CRYZ     | Missense_M<br>utation |             |
| VSCC14 | chr1:92178081-92178081   | C | T | <i>TGFBR3</i>  | NM_001195683:exon13:c.G1882<br>A:p.E628K,TGFBR3 | Missense_M<br>utation |             |
| VSCC14 | chr1:92712654-92712654   | C | T | <i>GLMN</i>    | NM_053274:exon18:c.G1633A:p.<br>E545K           | Missense_M<br>utation |             |
| VSCC14 | chr1:98058848-98058848   | G | C | <i>DPYD</i>    | NM_000110:exon10:c.C1054G:p.<br>L352V           | Missense_M<br>utation |             |
| VSCC14 | chr1:100347115-100347115 | G | A | <i>AGL</i>     | NM_000645:exon15:c.G2125A:p.<br>D709N,AGL       | Missense_M<br>utation |             |
| VSCC14 | chr1:108303476-108303476 | C | T | <i>VAV3</i>    | NM_006113:exon10:c.G947A:p.<br>G316E            | Missense_M<br>utation | COSM21689   |
| VSCC14 | chr1:109242064-109242064 | G | C | <i>PRPF38B</i> | NM_018061:exon6:c.G1063C:p.<br>E355Q            | Missense_M<br>utation |             |
| VSCC14 | chr1:111495169-111495169 | C | T | <i>LRIF1</i>   | NM_018372:exon2:c.G337A:p.D<br>113N             | Missense_M<br>utation |             |
| VSCC14 | chr1:150921644-150921644 | G | C | <i>SETDB1</i>  | NM_001145415:exon11:c.G1314<br>C:p.L438L,SETDB1 | Silent                |             |
| VSCC14 | chr1:152084411-152084411 | C | G | <i>TCHH</i>    | NM_007113:exon3:c.G1282C:p.<br>E428Q            | Missense_M<br>utation | COSM4418941 |
| VSCC14 | chr1:152084813-152084813 | C | A | <i>TCHH</i>    | NM_007113:exon3:c.G880T:p.E2<br>94X             | Nonsense_<br>Mutation | COSM443203  |
| VSCC14 | chr1:154245948-154245948 | G | A | <i>HAX1</i>    | NM_006118:exon2:c.G190A:p.G<br>64S              | Missense_M<br>utation | COSM4001751 |

|        |                          |   |   |                 |                                              |                   |             |
|--------|--------------------------|---|---|-----------------|----------------------------------------------|-------------------|-------------|
| VSCC14 | chr1:155292200-155292200 | C | G | <i>RUSC1</i>    | NM_001105203:exon2:c.C636G:p.L212L,RUSC1     | Silent            |             |
| VSCC14 | chr1:156235988-156235988 | G | A | <i>SMG5</i>     | NM_015327:exon12:c.C1439T:p.S480L            | Missense_Mutation |             |
| VSCC14 | chr1:158449754-158449754 | C | T | <i>OR10R2</i>   | NM_001004472:exon1:c.C87T:p.V29V             | Silent            |             |
| VSCC14 | chr1:180885996-180885996 | G | A | <i>KIAA1614</i> | NM_020950:exon2:c.G757A:p.D253N              | Missense_Mutation |             |
| VSCC14 | chr1:200817810-200817810 | C | G | <i>CAMSAP2</i>  | NM_001297708:exon11:c.C1865G:p.S622C,CAMSAP2 | Missense_Mutation |             |
| VSCC14 | chr1:201028330-201028330 | G | A | <i>CACNAIS</i>  | NM_000069:exon27:c.C3512T:p.A1171V           | Missense_Mutation |             |
| VSCC14 | chr1:205277781-205277781 | C | T | <i>NUAK2</i>    | NM_030952:exon3:c.G564A:p.R188R              | Silent            |             |
| VSCC14 | chr1:208391203-208391203 | G | C | <i>PLXNA2</i>   | NM_025179:exon2:c.C65G:p.S22X                | Nonsense_Mutation | COSM3757646 |
| VSCC14 | chr1:216373416-216373416 | A | C | <i>USH2A</i>    | NM_007123:exon17:c.T3364G:p.S1122A,USH2A     | Missense_Mutation |             |
| VSCC14 | chr1:222824213-222824213 | G | C | <i>MIA3</i>     | NM_001300867:exon6:c.G511C:p.E171Q,MIA3      | Missense_Mutation |             |
| VSCC14 | chr1:223285962-223285962 | C | G | <i>TLR5</i>     | NM_003268:exon6:c.G412C:p.D138H              | Missense_Mutation |             |
| VSCC14 | chr1:236925844-236925844 | G | A | <i>ACTN2</i>    | NM_001103:exon21:c.G2610A:p.S870S,ACTN2      | Silent            |             |
| VSCC14 | chr1:243828148-243828148 | G | A | <i>AKT3</i>     | NM_005465:exon3:c.C210T:p.N70N,AKT3          | Silent            |             |
| VSCC14 | chr2:27248898-27248898   | G | C | <i>MAPRE3</i>   | NM_001303050:exon6:c.G775C:p.E259Q,MAPRE3    | Missense_Mutation |             |
| VSCC14 | chr2:27729414-27729414   | G | T | <i>GCKR</i>     | NM_001486:exon11:c.G936T:p.K312N             | Missense_Mutation |             |
| VSCC14 | chr2:32772948-32772948   | C | G | <i>BIRC6</i>    | NM_016252:exon64:c.C12842G:p.S4281X          | Nonsense_Mutation |             |
| VSCC14 | chr2:37284541-37284541   | G | C | <i>HEATR5B</i>  | NM_019024:exon15:c.C2142G:p.L714L            | Silent            | COSM3716566 |
| VSCC14 | chr2:37455511-37455511   | C | G | <i>CEBPZ</i>    | NM_005760:exon2:c.G825C:p.K275N              | Missense_Mutation | COSM51603   |

|        |                          |   |   |                 |                                            |                   |             |
|--------|--------------------------|---|---|-----------------|--------------------------------------------|-------------------|-------------|
| VSCC14 | chr2:47748380-47748380   | C | G | <i>KCNK12</i>   | NM_022055:exon2:c.G959C:p.R320P            | Missense_Mutation |             |
| VSCC14 | chr2:54883083-54883083   | G | C | <i>SPTBN1</i>   | NM_178313:exon28:c.G5955C:p.K1985N,SPTBN1  | Missense_Mutation |             |
| VSCC14 | chr2:69002450-69002450   | G | A | <i>ARHGAP25</i> | NM_001166276:exon1:c.G138A:p.L46L,ARHGAP25 | Silent            |             |
| VSCC14 | chr2:69581631-69581631   | G | A | <i>GFPT1</i>    | NM_001244710:exon8:c.C675T:p.L225L,GFPT1   | Silent            |             |
| VSCC14 | chr2:74154071-74154071   | C | T | <i>DGUOK</i>    | NM_080916:exon1:c.C34T:p.R12X,DGUOK        | Nonsense_Mutation | COSM4113260 |
| VSCC14 | chr2:74761539-74761539   | T | A | <i>LOXL3</i>    | NM_001289165:exon7:c.A760T:p.I254F,LOXL3   | Missense_Mutation |             |
| VSCC14 | chr2:95843299-95843299   | G | A | <i>ZNF2</i>     | NM_001282398:exon3:c.G105A:p.Q35Q,ZNF2     | Silent            |             |
| VSCC14 | chr2:99636898-99636898   | C | T | <i>TSGA10</i>   | NM_182911:exon17:c.G1662A:p.R554R,TSGA10   | Silent            |             |
| VSCC14 | chr2:101652619-101652619 | C | G | <i>TBC1D8</i>   | NM_001102426:exon9:c.G1419C:p.Q473H        | Missense_Mutation |             |
| VSCC14 | chr2:106002932-106002932 | G | C | <i>FHL2</i>     | NM_001450:exon2:c.C42G:p.L14L,FHL2         | Silent            |             |
| VSCC14 | chr2:42522380-42522380   | G | T | <i>EML4</i>     | NM_001145076:exon11:c.G1160T:p.R387I,EML4  | Missense_Mutation | <i>EML4</i> |
| VSCC14 | chr2:112786140-112786140 | A | G | <i>MERTK</i>    | NM_006343:exon19:c.A2699G:p.D900G          | Missense_Mutation |             |
| VSCC14 | chr2:118753842-118753842 | C | G | <i>CCDC93</i>   | NM_019044:exon5:c.G460C:p.E154Q            | Missense_Mutation |             |
| VSCC14 | chr2:136594158-136594158 | G | A | <i>LCT</i>      | NM_002299:exon1:c.C582T:p.T194T            | Silent            |             |
| VSCC14 | chr2:152589661-152589661 | C | T | <i>NEB</i>      | NM_001164507:exon3:c.G10A:p.D4N,NEB        | Missense_Mutation |             |
| VSCC14 | chr2:166514485-166514485 | G | C | <i>CSRNP3</i>   | NM_024969:exon3:c.G363C:p.L121F,CSRNP3     | Missense_Mutation |             |
| VSCC14 | chr2:171641278-171641278 | G | A | <i>ERICH2</i>   | NM_001289947:exon2:c.G151A:p.E51K,ERICH2   | Missense_Mutation |             |
| VSCC14 | chr2:179474025-179474025 | C | G | <i>TTN</i>      | NM_003319:exon101:c.G24817C:p.D8273H,TTN   | Missense_Mutation | COSM3846048 |

|        |                          |   |   |               |                                              |                   |             |
|--------|--------------------------|---|---|---------------|----------------------------------------------|-------------------|-------------|
| VSCC14 | chr2:197002221-197002221 | C | T | <i>STK17B</i> | NM_004226:exon8:c.G1069A:p.D357N             | Missense_Mutation |             |
| VSCC14 | chr2:200188528-200188528 | G | C | <i>SATB2</i>  | NM_001172509:exon9:c.C1540G:p.Q514E,SATB2    | Missense_Mutation | COSM3759772 |
| VSCC14 | chr2:207345997-207345997 | C | T | <i>ADAM23</i> | NM_003812:exon3:c.C474T:p.F158F              | Silent            |             |
| VSCC14 | chr2:214239793-214239793 | G | A | <i>SPAG16</i> | NM_024532:exon9:c.G892A:p.E298K              | Missense_Mutation |             |
| VSCC14 | chr2:218954748-218954748 | G | A | <i>RUFY4</i>  | NM_198483:exon13:c.G1687A:p.A563T            | Missense_Mutation | COSM149542  |
| VSCC14 | chr2:230127480-230127480 | C | T | <i>PID1</i>   | NM_017933:exon2:c.G42A:p.S14S                | Silent            | COSM1693965 |
| VSCC14 | chr2:231327179-231327179 | A | T | <i>SP100</i>  | NM_001206703:exon9:c.A928T:p.T310S,SP100     | Missense_Mutation |             |
| VSCC14 | chr2:233715099-233715099 | G | A | <i>GIGYF2</i> | NM_001103148:exon27:c.G3794A:p.R1265Q,GIGYF2 | Missense_Mutation | COSM1429197 |
| VSCC14 | chr2:234465632-234465632 | G | C | <i>USP40</i>  | NM_018218:exon4:c.C451G:p.R151G              | Missense_Mutation |             |
| VSCC14 | chr2:242608076-242608076 | G | A | <i>ATG4B</i>  | NM_013325:exon10:c.G933A:p.A311A,ATG4B       | Silent            |             |
| VSCC14 | chr3:12856666-12856666   | G | A | <i>CAND2</i>  | NM_012298:exon6:c.G754A:p.D252N,CAND2        | Missense_Mutation | COSM1054876 |
| VSCC14 | chr3:19975045-19975045   | C | G | <i>EFHB</i>   | NM_144715:exon1:c.G466C:p.E156Q              | Missense_Mutation |             |
| VSCC14 | chr3:32737219-32737219   | C | G | <i>CNOT10</i> | NM_001256742:exon1:c.C102G:p.V34V            | Silent            |             |
| VSCC14 | chr3:44685299-44685299   | C | G | <i>ZNF197</i> | NM_006991:exon6:c.C2677G:p.Q893E             | Missense_Mutation |             |
| VSCC14 | chr3:45048961-45048961   | C | T | <i>EXOSC7</i> | NM_015004:exon7:c.C665T:p.S222L              | Missense_Mutation | COSM3760611 |
| VSCC14 | chr3:48622199-48622199   | C | T | <i>COL7A1</i> | NM_000094:exon34:c.G4015A:p.E1339K           | Missense_Mutation |             |
| VSCC14 | chr3:49061980-49061980   | C | G | <i>IMPDH2</i> | NM_000884:exon13:c.G1471C:p.E491Q            | Missense_Mutation |             |
| VSCC14 | chr3:49062005-49062005   | C | T | <i>IMPDH2</i> | NM_000884:exon13:c.G1446A:p.M482I            | Missense_Mutation |             |



|        |                          |   |   |                 |                                                  |                       |             |
|--------|--------------------------|---|---|-----------------|--------------------------------------------------|-----------------------|-------------|
| VSCC14 | chr3:50417182-50417182   | C | G | <i>CACNA2D2</i> | NM_001005505:exon10:c.G967C<br>:p.D323H,CACNA2D2 | Missense_M<br>utation |             |
| VSCC14 | chr3:52833770-52833770   | C | A | <i>ITIH3</i>    | NM_002217:exon9:c.C908A:p.T<br>303K              | Missense_M<br>utation |             |
| VSCC14 | chr3:62464012-62464012   | C | T | <i>CADPS</i>    | NM_183393:exon20:c.G3016A:p.<br>E1006K,CADPS     | Missense_M<br>utation |             |
| VSCC14 | chr3:62556574-62556574   | C | A | <i>CADPS</i>    | NM_003716:exon9:c.G1617T:p.<br>W539C,CADPS       | Missense_M<br>utation | COSM149707  |
| VSCC14 | chr3:64085435-64085435   | G | C | <i>PRICKLE2</i> | NM_198859:exon8:c.C1827G:p.<br>L609L             | Silent                |             |
| VSCC14 | chr3:123674921-123674921 | C | G | <i>CCDC14</i>   | NM_022757:exon4:c.G345C:p.L<br>115L              | Silent                |             |
| VSCC14 | chr3:124174141-124174141 | G | A | <i>KALRN</i>    | NM_001024660:exon22:c.G3664<br>A:p.D1222N,KALRN  | Missense_M<br>utation |             |
| VSCC14 | chr3:133524717-133524717 | G | C | <i>SRPRB</i>    | NM_021203:exon2:c.G25C:p.V9<br>L                 | Missense_M<br>utation |             |
| VSCC14 | chr3:134077492-134077492 | C | T | <i>AMOTL2</i>   | NM_001278683:exon9:c.G2345A<br>:p.R782K,AMOTL2   | Missense_M<br>utation |             |
| VSCC14 | chr3:134322931-134322931 | G | A | <i>KY</i>       | NM_178554:exon11:c.C1476T:p.<br>V492V            | Silent                |             |
| VSCC14 | chr3:186953808-186953808 | C | T | <i>MASP1</i>    | NM_139125:exon11:c.G1851A:p.<br>L617L            | Silent                |             |
| VSCC14 | chr3:190338196-190338196 | C | T | <i>ILIRAP</i>   | NM_001167929:exon5:c.C670T:<br>p.H224Y,ILIRAP    | Missense_M<br>utation | COSM1309912 |
| VSCC14 | chr3:190366230-190366230 | C | G | <i>ILIRAP</i>   | NM_001167929:exon11:c.C1449<br>G:p.L483L,ILIRAP  | Silent                |             |
| VSCC14 | chr4:2339215-2339215     | G | A | <i>ZFYVE28</i>  | NM_001172658:exon4:c.C389T:<br>p.S130L,ZFYVE28   | Missense_M<br>utation |             |
| VSCC14 | chr4:2339217-2339217     | G | C | <i>ZFYVE28</i>  | NM_001172658:exon4:c.C387G:<br>p.V129V,ZFYVE28   | Silent                |             |
| VSCC14 | chr4:2701666-2701666     | C | T | <i>FAM193A</i>  | NM_001256666:exon17:c.C2894<br>T:p.S965F,FAM193A | Missense_M<br>utation |             |
| VSCC14 | chr4:3156069-3156069     | G | A | <i>HTT</i>      | NM_002111:exon27:c.G3548A:p.<br>R1183Q           | Missense_M<br>utation |             |
| VSCC14 | chr4:5576462-5576462     | C | T | <i>EVC2</i>     | NM_001166136:exon19:c.G3070<br>A:p.D1024N,EVC2   | Missense_M<br>utation |             |

|        |                          |   |   |                 |                                               |                   |             |
|--------|--------------------------|---|---|-----------------|-----------------------------------------------|-------------------|-------------|
| VSCC14 | chr4:10446179-10446179   | G | A | <i>ZNF518B</i>  | NM_053042:exon3:c.C1774T:p.Q592X              | Nonsense_Mutation | COSM1165332 |
| VSCC14 | chr4:15688640-15688640   | G | A | <i>FAM200B</i>  | NM_001145191:exon2:c.G40A:p.V14M              | Missense_Mutation |             |
| VSCC14 | chr4:38829832-38829832   | T | C | <i>TLR6</i>     | NM_006068:exon2:c.A1263G:p.K421K              | Silent            |             |
| VSCC14 | chr4:42062236-42062236   | C | G | <i>SLC30A9</i>  | NM_006345:exon10:c.C869G:p.S290C              | Missense_Mutation |             |
| VSCC14 | chr4:47514709-47514709   | G | A | <i>ATP10D</i>   | NM_020453:exon2:c.G152A:p.R51Q                | Missense_Mutation |             |
| VSCC14 | chr4:48559625-48559625   | G | C | <i>FRYL</i>     | NM_015030:exon34:c.C3970G:p.L1324V            | Missense_Mutation | COSM3761554 |
| VSCC14 | chr4:48582887-48582887   | C | T | <i>FRYL</i>     | NM_015030:exon22:c.G2254A:p.D752N             | Missense_Mutation |             |
| VSCC14 | chr4:66356179-66356179   | C | T | <i>EPHA5</i>    | NM_001281765:exon5:c.G1318A:p.E440K,EPHA5     | Missense_Mutation |             |
| VSCC14 | chr4:88116518-88116518   | A | G | <i>KLHL8</i>    | NM_001292003:exon2:c.T174C:p.L58L,KLHL8       | Silent            |             |
| VSCC14 | chr4:96123981-96123981   | C | T | <i>UNC5C</i>    | NM_003728:exon12:c.G2037A:p.A679A             | Silent            |             |
| VSCC14 | chr4:106759025-106759025 | C | T | <i>GSTCD</i>    | NM_001031720:exon10:c.C1674T:p.F558F,GSTCD    | Silent            |             |
| VSCC14 | chr4:123175376-123175376 | G | C | <i>KIAA1109</i> | NM_015312:exon36:c.G5949C:p.L1983F            | Missense_Mutation | COSM3760921 |
| VSCC14 | chr4:146071956-146071956 | G | A | <i>OTUD4</i>    | NM_001102653:exon12:c.C875T:p.S292F           | Missense_Mutation |             |
| VSCC14 | chr4:154508912-154508912 | G | A | <i>KIAA0922</i> | NM_001131007:exon15:c.G1501A:p.E501K,KIAA0922 | Missense_Mutation |             |
| VSCC14 | chr4:177608517-177608517 | G | C | <i>VEGFC</i>    | NM_005429:exon6:c.C969G:p.L323L               | Silent            |             |
| VSCC14 | chr5:5146253-5146253     | G | A | <i>ADAMTS16</i> | NM_139056:exon3:c.G186A:p.L62L                | Silent            |             |
| VSCC14 | chr5:5464690-5464690     | C | G | <i>ICE1</i>     | NM_015325:exon13:c.C5243G:p.S1748C            | Missense_Mutation |             |
| VSCC14 | chr5:14492748-14492748   | G | A | <i>TRIO</i>     | NM_007118:exon49:c.G7705A:p.E2569K            | Missense_Mutation | COSM4682091 |

|        |                          |   |   |                  |                                             |                   |             |
|--------|--------------------------|---|---|------------------|---------------------------------------------|-------------------|-------------|
| VSCC14 | chr5:34880345-34880345   | G | A | <i>TTC23L</i>    | NM_144725:exon9:c.G1009A:p.E337K            | Missense_Mutation |             |
| VSCC14 | chr5:78326749-78326749   | C | T | <i>DMGDH</i>     | NM_013391:exon10:c.G1590A:p.A530A           | Silent            |             |
| VSCC14 | chr5:79734582-79734582   | C | T | <i>ZFYVE16</i>   | NM_001284237:exon3:c.C2078T;p.S693F,ZFYVE16 | Missense_Mutation |             |
| VSCC14 | chr5:93732110-93732110   | C | G | <i>KIAA0825</i>  | NM_001145678:exon17:c.G2992C;p.E998Q        | Missense_Mutation | COSM165960  |
| VSCC14 | chr5:98236738-98236738   | C | G | <i>CHD1</i>      | NM_001270:exon6:c.G636C:p.Q212H             | Missense_Mutation |             |
| VSCC14 | chr5:111601999-111601999 | C | T | <i>EPB41L4A</i>  | NM_022140:exon5:c.G364A:p.D122N             | Missense_Mutation |             |
| VSCC14 | chr5:126754887-126754887 | G | A | <i>MEGF10</i>    | NM_001256545:exon11:c.G1381A;p.D461N,MEGF10 | Missense_Mutation |             |
| VSCC14 | chr5:131546086-131546086 | C | T | <i>P4HA2</i>     | NM_001017973:exon6:c.G600A:p.E200E,P4HA2    | Silent            |             |
| VSCC14 | chr5:132098248-132098248 | G | A | <i>SEPT8</i>     | NM_001098811:exon5:c.C624T;p.V208V,SEPT8    | Silent            |             |
| VSCC14 | chr5:132200053-132200053 | C | G | <i>GDF9</i>      | NM_005260:exon1:c.G173C:p.R58T              | Missense_Mutation |             |
| VSCC14 | chr5:134010425-134010425 | C | G | <i>SEC24A</i>    | NM_001252231:exon5:c.C938G;p.S313C,SEC24A   | Missense_Mutation |             |
| VSCC14 | chr5:134782450-134782450 | T | A | <i>DCANP1</i>    | NM_130848:exon1:c.A349T:p.R117X             | Nonsense_Mutation |             |
| VSCC14 | chr5:135489666-135489666 | G | C | <i>SMAD5</i>     | UNKNOWN                                     | unknown           | COSM450416  |
| VSCC14 | chr5:137481501-137481501 | G | C | <i>BRD8</i>      | NM_139199:exon24:c.C3345G;p.V1115V          | Silent            |             |
| VSCC14 | chr5:139851896-139851896 | G | A | <i>ANKHD1</i>    | NM_017978:exon11:c.G1822A:p.D608N,ANKHD1    | Missense_Mutation |             |
| VSCC14 | chr5:140712626-140712626 | C | G | <i>PCDHGA1</i>   | NM_018912:exon1:c.C2375G;p.S792X,PCDHGA1    | Nonsense_Mutation | COSM4160266 |
| VSCC14 | chr5:150946368-150946368 | G | C | <i>FAT2</i>      | NM_001447:exon1:c.C2125G;p.H709D            | Missense_Mutation | COSM4160267 |
| VSCC14 | chr5:180166450-180166450 | G | A | <i>OR2Y1</i>     | NM_001001657:exon1:c.C609T;p.V203V          | Silent            |             |
| VSCC14 | chr6:27115273-27115273   | G | C | <i>HIST1H2AH</i> | NM_080596:exon1:c.G366C:p.E122D             | Missense_Mutation |             |

|        |                          |   |   |                  |                                             |                   |             |
|--------|--------------------------|---|---|------------------|---------------------------------------------|-------------------|-------------|
| VSCC14 | chr6:27860839-27860839   | C | T | <i>HIST1H2AM</i> | NM_003514:exon1:c.G89A:p.R30Q               | Missense_Mutation | COSM3723560 |
| VSCC14 | chr6:28359319-28359319   | C | T | <i>ZSCAN12</i>   | NM_001163391:exon4:c.G748A:p.E250K          | Missense_Mutation | COSM5425882 |
| VSCC14 | chr6:47763173-47763173   | C | G | <i>OPN5</i>      | NM_181744:exon4:c.C630G:p.L210L             | Silent            |             |
| VSCC14 | chr6:49696488-49696488   | C | T | <i>CRISP3</i>    | NM_001190986:exon8:c.G762A:p.R254R,CRISP3   | Silent            |             |
| VSCC14 | chr6:56481272-56481272   | G | A | <i>DST</i>       | NM_001723:exon24:c.C6993T:p.L2331L          | Silent            |             |
| VSCC14 | chr6:79752606-79752606   | G | C | <i>PHIP</i>      | NM_017934:exon7:c.C554G:p.S185C             | Missense_Mutation | COSM5710643 |
| VSCC14 | chr6:82923961-82923961   | G | A | <i>IBTK</i>      | NM_001300906:exon12:c.C2187T;p.F729F,IBTK   | Silent            | COSM4684337 |
| VSCC14 | chr6:89790806-89790806   | G | A | <i>PNRC1</i>     | NM_006813:exon1:c.G193A:p.G65S              | Missense_Mutation |             |
| VSCC14 | chr6:90428739-90428739   | G | C | <i>MDN1</i>      | NM_014611:exon42:c.C6068G:p.S2023X          | Nonsense_Mutation |             |
| VSCC14 | chr6:110107570-110107570 | G | A | <i>FIG4</i>      | NM_014845:exon18:c.G2014A:p.D672N           | Missense_Mutation |             |
| VSCC14 | chr6:121481215-121481215 | G | A | <i>TBC1D32</i>   | NM_152730:exon24:c.C2714T:p.S905L           | Missense_Mutation |             |
| VSCC14 | chr6:135359116-135359116 | G | C | <i>HBS1L</i>     | NM_001145207:exon5:c.C479G:p.S160C          | Missense_Mutation |             |
| VSCC14 | chr6:146242495-146242495 | C | T | <i>SHPRH</i>     | NM_001042683:exon21:c.G3816A:p.M1272I,SHPRH | Missense_Mutation |             |
| VSCC14 | chr6:146755140-146755140 | G | A | <i>GRM1</i>      | NM_001278064:exon8:c.G2793A:p.K931K         | Silent            |             |
| VSCC14 | chr6:146755324-146755324 | T | C | <i>GRM1</i>      | NM_001278064:exon8:c.T2977C:p.S993P         | Missense_Mutation |             |
| VSCC14 | chr6:150710606-150710606 | G | C | <i>IYD</i>       | NM_001164694:exon2:c.G297C:p.K99N,IYD       | Missense_Mutation |             |
| VSCC14 | chr6:152551717-152551717 | G | A | <i>SYNE1</i>     | NM_033071:exon114:c.C20947T:p.Q6983X,SYNE1  | Nonsense_Mutation |             |
| VSCC14 | chr6:160543123-160543123 | T | C | <i>SLC22A1</i>   | NM_003057:exon1:c.T156C:p.S52S,SLC22A1      | Silent            | COSM4592488 |

|        |                          |   |   |                |                                             |                   |             |
|--------|--------------------------|---|---|----------------|---------------------------------------------|-------------------|-------------|
| VSCC14 | chr6:167343199-167343199 | C | T | <i>RNASET2</i> | NM_003730:exon9:c.G648A:p.P216P             | Silent            | COSM4524222 |
| VSCC14 | chr6:170059591-170059591 | G | C | <i>WDR27</i>   | NM_001202550:exon8:c.C772G:p.L258V,WDR27    | Missense_Mutation | COSM5762278 |
| VSCC14 | chr7:4839263-4839263     | C | T | <i>RADIL</i>   | NM_018059:exon14:c.G3120A:p.L1040L          | Silent            |             |
| VSCC14 | chr7:5540644-5540644     | G | C | <i>FBXL18</i>  | NM_024963:exon3:c.C1256G:p.S419C            | Missense_Mutation |             |
| VSCC14 | chr7:6548692-6548692     | C | T | <i>GRID2IP</i> | NM_001145118:exon12:c.G2024A:p.R675Q        | Missense_Mutation |             |
| VSCC14 | chr7:19184846-19184846   | C | T | <i>FERD3L</i>  | NM_152898:exon1:c.G140A:p.R47Q              | Missense_Mutation | COSM4161765 |
| VSCC14 | chr7:29438081-29438081   | G | C | <i>CHN2</i>    | NM_001293071:exon4:c.G164C:p.G55A,CHN2      | Missense_Mutation |             |
| VSCC14 | chr7:31378745-31378745   | C | G | <i>NEUROD6</i> | NM_022728:exon2:c.G138C:p.K46N              | Missense_Mutation |             |
| VSCC14 | chr7:31617997-31617997   | G | A | <i>CCDC129</i> | NM_194300:exon7:c.G1119A:p.K373K,CCDC129    | Silent            |             |
| VSCC14 | chr7:44839407-44839407   | C | G | <i>PPIA</i>    | NM_021130:exon4:c.C296G:p.S99C,PPIA         | Missense_Mutation |             |
| VSCC14 | chr7:47408974-47408974   | T | A | <i>TNS3</i>    | NM_022748:exon17:c.A1269T:p.A423A           | Silent            | COSM5658540 |
| VSCC14 | chr7:73097559-73097559   | G | C | <i>DNAJC30</i> | NM_032317:exon1:c.C195G:p.I65M              | Missense_Mutation |             |
| VSCC14 | chr7:83592637-83592637   | C | T | <i>SEMA3A</i>  | NM_006080:exon16:c.G1744A:p.E582K           | Missense_Mutation |             |
| VSCC14 | chr7:100001352-100001352 | C | A | <i>ZCWPW1</i>  | NM_001258008:exon15:c.G1378T:p.E460X,ZCWPW1 | Nonsense_Mutation |             |
| VSCC14 | chr7:100001841-100001841 | C | A | <i>ZCWPW1</i>  | NM_001258008:exon14:c.G1281T:p.W427C,ZCWPW1 | Missense_Mutation |             |
| VSCC14 | chr7:100238749-100238749 | C | T | <i>TFR2</i>    | NM_003227:exon2:c.G136A:p.E46K              | Missense_Mutation |             |
| VSCC14 | chr7:100681359-100681359 | C | G | <i>MUC17</i>   | NM_001040105:exon3:c.C6662G:p.P2221R        | Missense_Mutation |             |
| VSCC14 | chr7:100799996-100799996 | G | A | <i>AP1S1</i>   | NM_001283:exon2:c.G125A:p.R42Q              | Missense_Mutation |             |

|        |                          |   |   |                |                                            |                   |             |
|--------|--------------------------|---|---|----------------|--------------------------------------------|-------------------|-------------|
| VSCC14 | chr7:107704311-107704311 | G | C | <i>LAMB4</i>   | NM_007356:exon22:c.C2956G:p.R986G          | Missense_Mutation |             |
| VSCC14 | chr7:114329936-114329936 | C | T | <i>FOXP2</i>   | NM_001172766:exon17:c.C2100T:p.D700D,FOXP2 | Silent            |             |
| VSCC14 | chr7:121753739-121753739 | C | A | <i>AASS</i>    | NM_005763:exon10:c.G1079T:p.G360V          | Missense_Mutation | COSM1100010 |
| VSCC14 | chr7:124404947-124404947 | G | A | <i>GPR37</i>   | NM_005302:exon1:c.C84T:p.L28L              | Silent            |             |
| VSCC14 | chr7:127979347-127979347 | C | T | <i>RBM28</i>   | NM_018077:exon3:c.G306A:p.P102P            | Silent            |             |
| VSCC14 | chr7:134800331-134800331 | C | G | <i>AGBL3</i>   | NM_178563:exon16:c.C2310G:p.F770L          | Missense_Mutation |             |
| VSCC14 | chr7:134849600-134849600 | C | G | <i>TMEM140</i> | NM_018295:exon2:c.C407G:p.S136C            | Missense_Mutation |             |
| VSCC14 | chr7:140373942-140373942 | C | G | <i>ADCK2</i>   | NM_052853:exon1:c.C812G:p.S271W            | Missense_Mutation |             |
| VSCC14 | chr7:154760222-154760222 | C | T | <i>PAXIP1</i>  | NM_007349:exon7:c.G1689A:p.A563A           | Silent            | COSM4163050 |
| VSCC14 | chr7:154760458-154760458 | G | A | <i>PAXIP1</i>  | NM_007349:exon7:c.C1453T:p.Q485X           | Nonsense_Mutation |             |
| VSCC14 | chr8:9592441-9592441     | G | C | <i>TNKS</i>    | NM_003747:exon16:c.G2380C:p.D794H          | Missense_Mutation |             |
| VSCC14 | chr8:9592486-9592486     | G | C | <i>TNKS</i>    | NM_003747:exon16:c.G2425C:p.D809H          | Missense_Mutation |             |
| VSCC14 | chr8:12589290-12589290   | G | A | <i>LONRF1</i>  | NM_152271:exon8:c.C1643T:p.S548F           | Missense_Mutation |             |
| VSCC14 | chr8:17611477-17611477   | C | G | <i>MTUS1</i>   | NM_001001924:exon2:c.G1840C:p.D614H,MTUS1  | Missense_Mutation |             |
| VSCC14 | chr8:22037224-22037224   | C | G | <i>BMP1</i>    | NM_001199:exon7:c.C843G:p.I281M,BMP1       | Missense_Mutation |             |
| VSCC14 | chr8:25237862-25237862   | G | A | <i>DOCK5</i>   | NM_024940:exon39:c.G3978A:p.E1326E         | Silent            |             |
| VSCC14 | chr8:28019531-28019531   | G | T | <i>ELP3</i>    | NM_001284224:exon12:c.G1146T:p.L382L,ELP3  | Silent            |             |
| VSCC14 | chr8:29202979-29202979   | C | T | <i>DUSP4</i>   | NM_057158:exon2:c.G68A:p.G23E              | Missense_Mutation |             |

|        |                          |   |   |                  |                                                   |                       |              |             |
|--------|--------------------------|---|---|------------------|---------------------------------------------------|-----------------------|--------------|-------------|
| VSCC14 | chr8:37732298-37732298   | C | G | <i>RAB11FIP1</i> | NM_001002814:exon3:c.G1357C<br>:p.E453Q,RAB11FIP1 | Missense_M<br>utation |              | COSM4162822 |
| VSCC14 | chr8:42206558-42206558   | G | A | <i>POLB</i>      | NM_002690:exon4:c.G211A:p.E<br>71K                | Missense_M<br>utation |              |             |
| VSCC14 | chr8:42206567-42206567   | G | C | <i>POLB</i>      | NM_002690:exon4:c.G220C:p.D<br>74H                | Missense_M<br>utation |              |             |
| VSCC14 | chr8:42591689-42591689   | G | A | <i>CHRNA3</i>    | NM_000749:exon6:c.G1305A:p.<br>L435L              | Silent                |              |             |
| VSCC14 | chr16:89871737-89871737  | C | T | <i>FANCA</i>     | NM_000135:exon7:c.G660A:p.Q<br>220Q,FANCA         | Silent                | <i>FANCA</i> |             |
| VSCC14 | chr8:59059278-59059278   | G | C | <i>FAM110B</i>   | NM_147189:exon5:c.G489C:p.L<br>163L               | Silent                |              | COSM1756140 |
| VSCC14 | chr8:67592072-67592072   | G | A | <i>C8orf44</i>   | NM_019607:exon3:c.G363A:p.K<br>121K               | Silent                |              |             |
| VSCC14 | chr8:70980738-70980738   | T | C | <i>PRDM14</i>    | NM_024504:exon3:c.A730G:p.K<br>244E               | Missense_M<br>utation |              |             |
| VSCC14 | chr8:88365996-88365996   | G | A | <i>CNBD1</i>     | NM_173538:exon10:c.G1285A:p.<br>E429K             | Missense_M<br>utation |              |             |
| VSCC14 | chr8:119391761-119391761 | C | G | <i>SAMD12</i>    | NM_207506:exon4:c.G501C:p.E<br>167D               | Missense_M<br>utation |              |             |
| VSCC14 | chr8:125499200-125499200 | C | G | <i>RNF139</i>    | NM_007218:exon2:c.C1310G:p.S<br>437C              | Missense_M<br>utation |              |             |
| VSCC14 | chr8:131812695-131812695 | C | G | <i>ADCY8</i>     | NM_001115:exon15:c.G3037C:p.<br>E1013Q            | Missense_M<br>utation |              |             |
| VSCC14 | chr8:136619207-136619207 | G | C | <i>KHDRBS3</i>   | NM_006558:exon7:c.G817C:p.D<br>273H               | Missense_M<br>utation |              |             |
| VSCC14 | chr8:143353009-143353009 | C | T | <i>TSNARE1</i>   | NM_001291931:exon11:c.G833A<br>:p.X278X           | Silent                |              |             |
| VSCC14 | chr8:144623574-144623574 | T | C | <i>ZC3H3</i>     | NM_015117:exon1:c.A18G:p.I6<br>M                  | Missense_M<br>utation |              |             |
| VSCC14 | chr8:144659478-144659478 | C | T | <i>NAPRT</i>     | NM_001286829:exon4:c.G529A:<br>p.D177N,NAPRT      | Missense_M<br>utation |              |             |
| VSCC14 | chr8:144992753-144992753 | C | T | <i>PLEC</i>      | NM_201378:exon32:c.G11194A:<br>p.E3732K,PLEC      | Missense_M<br>utation |              |             |
| VSCC14 | chr8:145058986-145058986 | A | G | <i>PARP10</i>    | NM_032789:exon5:c.T1184C:p.L<br>395P              | Missense_M<br>utation |              |             |

|        |                          |   |   |                |                                             |                   |             |
|--------|--------------------------|---|---|----------------|---------------------------------------------|-------------------|-------------|
| VSCC14 | chr8:145666438-145666438 | G | A | <i>TONSL</i>   | NM_013432:exon8:c.C922T:p.Q308X             | Nonsense_Mutation | COSM4165479 |
| VSCC14 | chr9:14842497-14842497   | C | T | <i>FREMI</i>   | NM_144966:exon10:c.G1555A:p.D519N           | Missense_Mutation |             |
| VSCC14 | chr9:19116314-19116314   | G | T | <i>PLIN2</i>   | NM_001122:exon8:c.C1246A:p.Q416K            | Missense_Mutation | COSM3440467 |
| VSCC14 | chr9:33941837-33941837   | G | C | <i>UBAP2</i>   | NM_001282529:exon12:c.C938G:p.S313X,UBAP2   | Nonsense_Mutation | COSM427906  |
| VSCC14 | chr9:35713040-35713040   | C | A | <i>TLN1</i>    | NM_006289:exon27:c.G3353T:p.G1118V          | Missense_Mutation |             |
| VSCC14 | chr9:72131922-72131922   | C | T | <i>APBA1</i>   | NM_001163:exon2:c.G205A:p.E69K              | Missense_Mutation |             |
| VSCC14 | chr9:104314819-104314819 | C | G | <i>RNF20</i>   | NM_019592:exon13:c.C1685G:p.S562C           | Missense_Mutation |             |
| VSCC14 | chr9:123622433-123622433 | A | T | <i>PHF19</i>   | NM_001286842:exon9:c.T708A:p.D236E,PHF19    | Missense_Mutation |             |
| VSCC14 | chr9:127176263-127176263 | C | G | <i>PSMB7</i>   | NM_002799:exon3:c.G178C:p.D60H              | Missense_Mutation |             |
| VSCC14 | chr9:131767668-131767668 | A | C | <i>NUP188</i>  | NM_015354:exon40:c.A4596C:p.S1532S          | Silent            |             |
| VSCC14 | chr9:139371329-139371329 | C | T | <i>SEC16A</i>  | NM_001276418:exon2:c.G739A:p.V247I,SEC16A   | Missense_Mutation | COSM4844035 |
| VSCC14 | chr9:139981464-139981464 | G | A | <i>MAN1B1</i>  | NM_016219:exon1:c.G13A:p.E5K                | Missense_Mutation |             |
| VSCC14 | chr10:5791803-5791803    | G | A | <i>FAM208B</i> | NM_017782:exon15:c.G6419A:p.G2140E          | Missense_Mutation |             |
| VSCC14 | chr10:34400142-34400142  | C | T | <i>PARD3</i>   | NM_001184791:exon21:c.G3690A:p.L1230L,PARD3 | Silent            |             |
| VSCC14 | chr10:38344990-38344990  | C | T | <i>ZNF33A</i>  | NM_001278170:exon4:c.C1956T:p.F652F,ZNF33A  | Silent            |             |
| VSCC14 | chr10:43089448-43089448  | G | C | <i>ZNF33B</i>  | NM_001305033:exon4:c.C971G:p.S324X,ZNF33B   | Nonsense_Mutation |             |
| VSCC14 | chr10:61829859-61829859  | G | A | <i>ANK3</i>    | NM_020987:exon37:c.C10780T:p.P3594S         | Missense_Mutation | COSM4993862 |
| VSCC14 | chr10:75407027-75407027  | G | A | <i>SYNPO2L</i> | NM_024875:exon2:c.C1711T:p.L571L,SYNPO2L    | Silent            | COSM1492561 |



|        |                           |   |   |                 |                                            |                   |             |
|--------|---------------------------|---|---|-----------------|--------------------------------------------|-------------------|-------------|
| VSCC14 | chr10:75532727-75532727   | C | G | <i>FUT11</i>    | NM_001284194:exon1:c.C636G:p.L212L,FUT11   | Silent            |             |
| VSCC14 | chr10:82277702-82277702   | C | T | <i>TSPAN14</i>  | NM_001128309:exon6:c.C414T:p.I138I,TSPAN14 | Silent            |             |
| VSCC14 | chr10:99079221-99079221   | G | A | <i>FRAT1</i>    | NM_005479:exon1:c.G11A:p.R4Q               | Missense_Mutation |             |
| VSCC14 | chr10:102676364-102676364 | C | G | <i>SLF2</i>     | NM_001136123:exon3:c.C222G:p.I74M,SLF2     | Missense_Mutation |             |
| VSCC14 | chr10:103900042-103900042 | G | C | <i>PPRC1</i>    | NM_001288727:exon5:c.G1777C:p.D593H,PPRC1  | Missense_Mutation |             |
| VSCC14 | chr11:488295-488295       | G | A | <i>PTDSS2</i>   | NM_030783:exon7:c.G718A:p.E240K            | Missense_Mutation |             |
| VSCC14 | chr11:1218128-1218128     | G | A | <i>MUC5AC</i>   | UNKNOWN                                    | unknown           | COSM1356602 |
| VSCC14 | chr11:5566286-5566286     | G | A | <i>OR52H1</i>   | NM_001005289:exon1:c.C468T:p.I156I         | Silent            |             |
| VSCC14 | chr11:6644503-6644503     | G | C | <i>DCHS1</i>    | NM_003737:exon21:c.C8404G:p.L2802V         | Missense_Mutation |             |
| VSCC14 | chr11:9005669-9005669     | C | T | <i>NRIP3</i>    | NM_020645:exon5:c.G565A:p.D189N            | Missense_Mutation |             |
| VSCC14 | chr11:18956110-18956110   | G | C | <i>MGRPRX1</i>  | NM_147199:exon1:c.C222G:p.L74L             | Silent            | COSM4592080 |
| VSCC14 | chr11:30255155-30255155   | G | C | <i>FSHB</i>     | NM_000510:exon3:c.G198C:p.Q66H,FSHB        | Missense_Mutation |             |
| VSCC14 | chr11:48285856-48285856   | C | T | <i>OR4X1</i>    | NM_001004726:exon1:c.C444T:p.G148G         | Silent            |             |
| VSCC14 | chr11:48328497-48328497   | C | T | <i>OR4S1</i>    | NM_001004725:exon1:c.C723T:p.H241H         | Silent            |             |
| VSCC14 | chr11:59812162-59812162   | C | G | <i>OOSP2</i>    | NM_173801:exon3:c.C262G:p.L88V             | Missense_Mutation |             |
| VSCC14 | chr11:61543593-61543593   | C | T | <i>MYRF</i>     | NM_001127392:exon9:c.C1377T:p.F459F,MYRF   | Silent            |             |
| VSCC14 | chr11:63064898-63064898   | C | A | <i>SLC22A10</i> | NM_001039752:exon3:c.C630A:p.S210S         | Silent            |             |
| VSCC14 | chr11:64536777-64536777   | G | A | <i>SF1</i>      | NM_001178030:exon7:c.C1072T:p.P358S,SF1    | Missense_Mutation |             |
| VSCC14 | chr11:66359995-66359995   | G | C | <i>CCDC87</i>   | NM_018219:exon1:c.C492G:p.L164L            | Silent            |             |

|        |                           |   |   |                 |                                            |                   |             |
|--------|---------------------------|---|---|-----------------|--------------------------------------------|-------------------|-------------|
| VSCC14 | chr11:67838318-67838318   | G | A | <i>CHKA</i>     | NM_212469:exon4:c.C583T:p.R195X,CHKA       | Nonsense_Mutation |             |
| VSCC14 | chr11:69063136-69063136   | C | T | <i>MYEOV</i>    | NM_001293294:exon2:c.C45T:p.A15A,MYEOV     | Silent            |             |
| VSCC14 | chr11:69063510-69063510   | G | A | <i>MYEOV</i>    | NM_001293294:exon2:c.G419A:p.R140Q,MYEOV   | Missense_Mutation |             |
| VSCC14 | chr11:84028075-84028075   | C | T | <i>DLG2</i>     | NM_001206769:exon1:c.G114A:p.Q38Q          | Silent            |             |
| VSCC14 | chr11:92569786-92569786   | G | A | <i>FAT3</i>     | NM_001008781:exon15:c.G10141A:p.V3381M     | Missense_Mutation |             |
| VSCC14 | chr11:96124429-96124429   | G | A | <i>JRKL</i>     | NM_003772:exon1:c.G616A:p.E206K,JRKL       | Missense_Mutation |             |
| VSCC14 | chr11:99690461-99690461   | A | G | <i>CNTN5</i>    | NM_001243270:exon3:c.A242G:p.N81S,CNTN5    | Missense_Mutation |             |
| VSCC14 | chr11:105795284-105795284 | G | A | <i>GRIA4</i>    | NM_000829:exon12:c.G1636A:p.E546K,GRIA4    | Missense_Mutation |             |
| VSCC14 | chr11:112071496-112071496 | G | C | <i>BCO2</i>     | NM_001256398:exon5:c.G807C:p.Q269H,BCO2    | Missense_Mutation | COSM3462002 |
| VSCC14 | chr11:114167425-114167425 | C | G | <i>NNMT</i>     | NM_006169:exon1:c.C147G:p.F49L             | Missense_Mutation | COSM5051729 |
| VSCC14 | chr11:123597236-123597236 | C | T | <i>ZNF202</i>   | NM_001301819:exon6:c.G744A:p.E248E,ZNF202  | Silent            |             |
| VSCC14 | chr11:128842632-128842632 | C | T | <i>ARHGAP32</i> | NM_014715:exon12:c.G2680A:p.D894N,ARHGAP32 | Missense_Mutation |             |
| VSCC14 | chr11:134051000-134051000 | C | G | <i>NCAPD3</i>   | NM_015261:exon20:c.G2531C:p.G844A          | Missense_Mutation |             |
| VSCC14 | chr12:1036070-1036070     | G | C | <i>RAD52</i>    | NM_001297420:exon6:c.C510G:p.L170L         | Silent            |             |
| VSCC14 | chr12:1036422-1036422     | G | C | <i>RAD52</i>    | NM_001297421:exon4:c.C125G:p.S42X,RAD52    | Nonsense_Mutation |             |
| VSCC14 | chr12:8667857-8667857     | G | T | <i>CLEC4D</i>   | NM_080387:exon2:c.G54T:p.L18L              | Silent            |             |
| VSCC14 | chr12:10131582-10131582   | C | T | <i>CLEC12A</i>  | NM_001300730:exon2:c.C109T:p.H37Y,CLEC12A  | Missense_Mutation |             |
| VSCC14 | chr12:14659173-14659173   | C | T | <i>PLBD1</i>    | NM_024829:exon10:c.G1402A:p.D468N          | Missense_Mutation |             |

|        |                           |   |   |                 |                                             |                   |             |
|--------|---------------------------|---|---|-----------------|---------------------------------------------|-------------------|-------------|
| VSCC14 | chr12:18800927-18800927   | G | C | <i>PIK3C2G</i>  | NM_004570:exon32:c.G4303C:p.E1435Q,PIK3C2G  | Missense_Mutation | COSM1359176 |
| VSCC14 | chr12:21788572-21788572   | G | A | <i>LDHB</i>     | NM_001174097:exon8:c.C909T:p.S303S,LDHB     | Silent            |             |
| VSCC14 | chr12:40702388-40702388   | C | T | <i>LRRK2</i>    | NM_198578:exon29:c.C4079T:p.S1360L          | Missense_Mutation | COSM4146722 |
| VSCC14 | chr12:50232522-50232522   | G | A | <i>BCDIN3D</i>  | NM_181708:exon2:c.C511T:p.H171Y             | Missense_Mutation |             |
| VSCC14 | chr12:50358837-50358837   | C | T | <i>AQP5</i>     | NM_001651:exon4:c.C675T:p.L225L             | Silent            | COSM3999043 |
| VSCC14 | chr12:51883546-51883546   | C | T | <i>SLC4A8</i>   | NM_001039960:exon19:c.C2511T:p.I837I,SLC4A8 | Silent            |             |
| VSCC14 | chr12:54576133-54576133   | C | T | <i>SMUG1</i>    | NM_001243788:exon3:c.G560A:p.R187Q,SMUG1    | Missense_Mutation |             |
| VSCC14 | chr12:58111675-58111675   | C | G | <i>OS9</i>      | NM_001261421:exon9:c.C972G:p.V324V,OS9      | Silent            | COSM5842648 |
| VSCC14 | chr12:69968262-69968262   | C | G | <i>FRS2</i>     | NM_001278357:exon7:c.C1054G:p.L352V,FRS2    | Missense_Mutation | COSM4147544 |
| VSCC14 | chr12:78515983-78515983   | C | G | <i>NAV3</i>     | NM_001024383:exon16:c.C4013G:p.S1338C,NAV3  | Missense_Mutation |             |
| VSCC14 | chr12:85450632-85450632   | G | C | <i>LRRRIQ1</i>  | NM_001079910:exon8:c.G2061C:p.L687F         | Missense_Mutation |             |
| VSCC14 | chr12:96359478-96359478   | G | A | <i>AMDHD1</i>   | NM_152435:exon7:c.G953A:p.R318Q             | Missense_Mutation | COSM5445681 |
| VSCC14 | chr12:102224356-102224356 | G | A | <i>GNPTAB</i>   | NM_024312:exon1:c.C98T:p.S33F               | Missense_Mutation |             |
| VSCC14 | chr12:102224445-102224445 | G | A | <i>GNPTAB</i>   | NM_024312:exon1:c.C9T:p.F3F                 | Silent            |             |
| VSCC14 | chr12:109182547-109182547 | C | G | <i>SSH1</i>     | NM_018984:exon15:c.G2367C:p.L789L           | Silent            |             |
| VSCC14 | chr12:118520170-118520170 | G | A | <i>VSIG10</i>   | NM_019086:exon3:c.C426T:p.Y142Y             | Silent            | COSM3496652 |
| VSCC14 | chr12:121177221-121177221 | C | T | <i>ACADS</i>    | NM_000017:exon10:c.C1209T:p.A403A,ACADS     | Silent            |             |
| VSCC14 | chr12:121471337-121471337 | G | A | <i>OASL</i>     | NM_001261825:exon2:c.C408T:p.L136L,OASL     | Silent            |             |
| VSCC14 | chr13:20240619-20240619   | G | A | <i>MPHOSPH8</i> | NM_017520:exon10:c.G2074A:p.D692N           | Missense_Mutation |             |

|        |                           |   |   |                 |                                                 |                       |             |
|--------|---------------------------|---|---|-----------------|-------------------------------------------------|-----------------------|-------------|
| VSCC14 | chr13:23908034-23908034   | A | G | <i>SACS</i>     | NM_001278055:exon8:c.T9540C<br>:p.A3180A,SACS   | Silent                |             |
| VSCC14 | chr13:45148882-45148882   | C | T | <i>TSC22D1</i>  | NM_001243799:exon1:c.G1329A<br>:p.L443L,TSC22D1 | Silent                |             |
| VSCC14 | chr13:47269090-47269090   | G | A | <i>LRCH1</i>    | NM_001164211:exon9:c.G1183A<br>:p.E395K,LRCH1   | Missense_M<br>utation |             |
| VSCC14 | chr13:53049104-53049104   | G | A | <i>CKAP2</i>    | NM_001098525:exon9:c.G1880A<br>:p.R627H,CKAP2   | Missense_M<br>utation |             |
| VSCC14 | chr13:101720300-101720300 | T | G | <i>NALCN</i>    | NM_052867:exon39:c.A4416C:p.<br>I1472I          | Silent                |             |
| VSCC14 | chr13:114152803-114152803 | G | A | <i>TMCO3</i>    | NM_017905:exon3:c.G591A:p.E<br>197E             | Silent                | COSM5445461 |
| VSCC14 | chr14:22133416-22133416   | A | G | <i>OR4E2</i>    | NM_001001912:exon1:c.A120G:<br>p.S40S           | Silent                |             |
| VSCC14 | chr14:22133997-22133997   | A | G | <i>OR4E2</i>    | NM_001001912:exon1:c.A701G:<br>p.Q234R          | Missense_M<br>utation |             |
| VSCC14 | chr14:23946490-23946490   | G | C | <i>NGDN</i>     | NM_001042635:exon9:c.G795C:<br>p.M265I,NGDN     | Missense_M<br>utation |             |
| VSCC14 | chr14:36169440-36169440   | G | T | <i>RALGAP1</i>  | NM_001283044:exon17:c.C2335<br>A:p.P779T        | Missense_M<br>utation |             |
| VSCC14 | chr14:38679155-38679155   | C | T | <i>SSTR1</i>    | NM_001049:exon3:c.C561T:p.L1<br>87L             | Silent                |             |
| VSCC14 | chr14:60903654-60903654   | G | A | <i>C14orf39</i> | NM_174978:exon18:c.C1673T:p.<br>S558L           | Missense_M<br>utation | COSM4740542 |
| VSCC14 | chr14:68045935-68045935   | G | A | <i>PLEKHH1</i>  | NM_020715:exon21:c.G2934A:p.<br>S978S           | Silent                |             |
| VSCC14 | chr14:74759482-74759482   | C | A | <i>ABCD4</i>    | NM_005050:exon9:c.G905T:p.S3<br>02I             | Missense_M<br>utation |             |
| VSCC14 | chr14:75142985-75142985   | C | G | <i>AREL1</i>    | NM_001039479:exon7:c.G691C:<br>p.E231Q          | Missense_M<br>utation | COSM3273238 |
| VSCC14 | chr14:75515138-75515138   | C | T | <i>MLH3</i>     | NM_001040108:exon2:c.G1221A<br>:p.Q407Q,MLH3    | Silent                |             |
| VSCC14 | chr14:75555294-75555294   | G | C | <i>NEK9</i>     | NM_033116:exon20:c.C2493G:p.<br>L831L           | Silent                |             |
| VSCC14 | chr14:77942001-77942001   | G | T | <i>ISM2</i>     | NM_199296:exon7:c.C1653A:p.<br>A551A            | Silent                |             |

|        |                          |   |   |                              |                                                    |                   |             |
|--------|--------------------------|---|---|------------------------------|----------------------------------------------------|-------------------|-------------|
| VSCC14 | chr14:77942002-77942002  | G | T | <i>ISM2</i>                  | NM_199296:exon7:c.C1652A:p.A551D                   | Missense_Mutation |             |
| VSCC14 | chr14:94039087-94039087  | G | C | <i>UNC79</i>                 | NM_020818:exon16:c.G1464C:p.E488D                  | Missense_Mutation |             |
| VSCC14 | chr14:95910933-95910933  | T | C | <i>SYNE3</i>                 | NM_152592:exon9:c.A1665G:p.A555A                   | Silent            | COSM287779  |
| VSCC14 | chr15:23006262-23006262  | C | G | <i>NIPA2</i>                 | NM_001008894:exon5:c.G985C:p.E329Q,NIPA2           | Missense_Mutation |             |
| VSCC14 | chr15:42139642-42139642  | C | T | <i>JMJD7-PLA2G4B,PLA2G4B</i> | NM_001114633:exon19:c.C2055T;p.S685S,JMJD7-PLA2G4B | Silent            | COSM5007705 |
| VSCC14 | chr15:42702014-42702014  | G | A | <i>CAPN3</i>                 | NM_173089:exon3:c.G27A:p.K9K,CAPN3                 | Silent            | COSM3754959 |
| VSCC14 | chr15:48784721-48784721  | C | T | <i>FBN1</i>                  | NM_000138:exon24:c.G2791A:p.G931R                  | Missense_Mutation |             |
| VSCC14 | chr15:68582417-68582417  | C | T | <i>FEM1B</i>                 | NM_015322:exon2:c.C721T:p.H241Y                    | Missense_Mutation |             |
| VSCC14 | chr15:91549894-91549894  | G | A | <i>VPS33B</i>                | NM_001289148:exon9:c.C685T:p.R229C,VPS33B          | Missense_Mutation |             |
| VSCC14 | chr15:92459648-92459648  | C | T | <i>SLCO3A1</i>               | NM_001145044:exon2:c.C606T:p.I202I,SLCO3A1         | Silent            |             |
| VSCC14 | chr15:99511724-99511724  | G | C | <i>PGPEP1L</i>               | NM_001102612:exon5:c.C574G:p.P192A,PGPEP1L         | Missense_Mutation |             |
| VSCC14 | chr16:705658-705658      | C | T | <i>WDR90</i>                 | NM_145294:exon16:c.C1804T:p.R602W                  | Missense_Mutation |             |
| VSCC14 | chr16:1416310-1416310    | G | T | <i>UNKL</i>                  | NM_001193389:exon6:c.C480A:p.I160I,UNKL            | Silent            | COSM1381146 |
| VSCC14 | chr16:1470551-1470551    | G | T | <i>C16orf91</i>              | NM_001272051:exon2:c.C95A:p.S32Y                   | Missense_Mutation |             |
| VSCC14 | chr16:2338163-2338163    | C | T | <i>ABCA3</i>                 | NM_001089:exon21:c.G2868A:p.L956L                  | Silent            |             |
| VSCC14 | chr16:2814161-2814161    | G | C | <i>SRRM2</i>                 | NM_016333:exon11:c.G3632C:p.R1211T                 | Missense_Mutation |             |
| VSCC14 | chr4:187535391-187535391 | C | T | <i>FAT1</i>                  | NM_005245:exon12:c.G9183A:p.T3061T                 | Silent            | <i>FAT1</i> |
| VSCC14 | chr16:27709664-27709664  | G | T | <i>KIAA0556</i>              | NM_015202:exon9:c.G956T:p.R319L                    | Missense_Mutation |             |

|        |                          |   |   |                  |                                             |                   |             |
|--------|--------------------------|---|---|------------------|---------------------------------------------|-------------------|-------------|
| VSCC14 | chr16:53503934-53503934  | G | A | <i>RBL2</i>      | NM_005611:exon15:c.G2082A:p.T694T           | Silent            |             |
| VSCC14 | chr16:58314433-58314433  | T | C | <i>PRSS54</i>    | NM_001305174:exon6:c.A586G:p.T196A,PRSS54   | Missense_Mutation |             |
| VSCC14 | chr16:67719439-67719439  | G | C | <i>GFOD2</i>     | NM_001243650:exon2:c.C180G:p.I60M,GFOD2     | Missense_Mutation |             |
| VSCC14 | chr16:70578423-70578423  | G | A | <i>SF3B3</i>     | NM_012426:exon10:c.G1316A:p.R439K           | Missense_Mutation | COSM3755579 |
| VSCC14 | chr16:77323210-77323210  | C | T | <i>ADAMTS18</i>  | NM_199355:exon22:c.G3501A:p.P1167P          | Silent            | COSM4816475 |
| VSCC14 | chr4:187541689-187541689 | G | C | <i>FAT1</i>      | NM_005245:exon10:c.C6051G:p.L2017L          | Silent            | <i>FAT1</i> |
| VSCC14 | chr17:1630111-1630111    | G | C | <i>WDR81</i>     | NM_001163809:exon1:c.G1858C:p.E620Q         | Missense_Mutation | COSM3755957 |
| VSCC14 | chr17:1640709-1640709    | C | T | <i>WDR81</i>     | NM_001163673:exon10:c.C1947T:p.T649T,WDR81  | Silent            | COSM3388283 |
| VSCC14 | chr17:1673276-1673276    | C | T | <i>SERPINF1</i>  | NM_002615:exon3:c.C215T:p.T72M              | Missense_Mutation |             |
| VSCC14 | chr17:4803571-4803571    | G | C | <i>C17orf107</i> | NM_001145536:exon3:c.G316C:p.D106H          | Missense_Mutation |             |
| VSCC14 | chr17:4881800-4881800    | G | A | <i>CAMTA2</i>    | NM_001171166:exon9:c.C1770T:p.P590P,CAMTA2  | Silent            |             |
| VSCC14 | chr17:36484529-36484529  | C | A | <i>GPR179</i>    | NM_001004334:exon11:c.G4923T:p.Q1641H       | Missense_Mutation |             |
| VSCC14 | chr17:36623305-36623305  | G | A | <i>ARHGAP23</i>  | NM_001199417:exon7:c.G1381A:p.E461K         | Missense_Mutation | COSM4991160 |
| VSCC14 | chr17:39034540-39034540  | C | G | <i>KRT20</i>     | NM_019010:exon6:c.G996C:p.L332F             | Missense_Mutation |             |
| VSCC14 | chr17:40823026-40823026  | G | T | <i>PLEKHH3</i>   | NM_024927:exon9:c.C1407A:p.L469L            | Silent            | COSM1559502 |
| VSCC14 | chr17:42429130-42429130  | G | A | <i>GRN</i>       | NM_002087:exon10:c.G1146A:p.T382T           | Silent            |             |
| VSCC14 | chr17:42476409-42476409  | G | A | <i>GPATCH8</i>   | NM_001304943:exon5:c.C2802T:p.H934H,GPATCH8 | Silent            |             |
| VSCC14 | chr17:48156607-48156607  | C | G | <i>ITGA3</i>     | NM_002204:exon20:c.C2568G:p.L856L           | Silent            |             |

|        |                          |   |   |                 |                                             |                   |             |
|--------|--------------------------|---|---|-----------------|---------------------------------------------|-------------------|-------------|
| VSCC14 | chr17:77042718-77042718  | C | T | <i>C1QTNF1</i>  | NM_030968:exon3:c.C237T:p.P79P,C1QTNF1      | Silent            |             |
| VSCC14 | chr17:78971075-78971075  | C | T | <i>CHMP6</i>    | NM_024591:exon6:c.C429T:p.L143L             | Silent            |             |
| VSCC14 | chr18:6093493-6093493    | T | C | <i>L3MBTL4</i>  | NM_173464:exon15:c.A1234G:p.K412E           | Missense_Mutation |             |
| VSCC14 | chr18:11824986-11824986  | G | A | <i>GNAL</i>     | NM_182978:exon5:c.G694A:p.E232K,GNAL        | Missense_Mutation |             |
| VSCC14 | chr18:14105547-14105547  | C | T | <i>ZNF519</i>   | NM_145287:exon3:c.G992A:p.R331K             | Missense_Mutation | COSM3756721 |
| VSCC14 | chr4:126239348-126239348 | G | A | <i>FAT4</i>     | NM_001291285:exon1:c.G1782A:p.E594E,FAT4    | Silent            | <i>FAT4</i> |
| VSCC14 | chr18:25593754-25593754  | C | T | <i>CDH2</i>     | NM_001308176:exon2:c.G199A:p.E67K,CDH2      | Missense_Mutation | COSM1711621 |
| VSCC14 | chr18:44140396-44140396  | C | T | <i>LOXHD1</i>   | NM_144612:exon19:c.G2711A:p.R904Q           | Missense_Mutation |             |
| VSCC14 | chr18:55104016-55104016  | T | C | <i>ONECUT2</i>  | NM_004852:exon1:c.T1068C:p.F356F            | Silent            |             |
| VSCC14 | chr18:56819783-56819783  | G | A | <i>SEC11C</i>   | NM_001307941:exon3:c.G213A:p.P71P,SEC11C    | Silent            |             |
| VSCC14 | chr18:72021490-72021490  | C | A | <i>C18orf63</i> | NM_001174123:exon12:c.C1988A:p.S663Y        | Missense_Mutation |             |
| VSCC14 | chr18:72114181-72114181  | C | T | <i>FAM69C</i>   | NM_001044369:exon2:c.G536A:p.R179H          | Missense_Mutation |             |
| VSCC14 | chr18:77918344-77918344  | G | A | <i>PARD6G</i>   | NM_032510:exon3:c.C441T:p.I147I             | Silent            |             |
| VSCC14 | chr19:1011404-1011404    | G | A | <i>TMEM259</i>  | NM_001033026:exon9:c.C1179T:p.I393I,TMEM259 | Silent            |             |
| VSCC14 | chr19:1806677-1806677    | C | T | <i>ATP8B3</i>   | NM_001178002:exon7:c.G468A:p.K156K,ATP8B3   | Silent            | COSM123131  |
| VSCC14 | chr19:2042657-2042657    | G | A | <i>MKNK2</i>    | NM_017572:exon9:c.C603T:p.I201I,MKNK2       | Silent            |             |
| VSCC14 | chr19:3831525-3831525    | C | A | <i>ZFR2</i>     | NM_015174:exon5:c.G628T:p.V210L             | Missense_Mutation |             |
| VSCC14 | chr19:3964318-3964318    | G | A | <i>DAPK3</i>    | NM_001348:exon4:c.C477T:p.L159L             | Silent            |             |

|        |                         |   |   |                |                                            |                   |             |
|--------|-------------------------|---|---|----------------|--------------------------------------------|-------------------|-------------|
| VSCC14 | chr19:4283170-4283170   | G | A | <i>SHD</i>     | NM_020209:exon3:c.G523A:p.E175K            | Missense_Mutation | COSM447499  |
| VSCC14 | chr19:4327313-4327313   | C | T | <i>STAP2</i>   | NM_001013841:exon7:c.G660A:p.P220P,STAP2   | Silent            |             |
| VSCC14 | chr19:6741089-6741089   | C | G | <i>TRIP10</i>  | NM_001288962:exon2:c.C93G:p.F31L,TRIP10    | Missense_Mutation |             |
| VSCC14 | chr19:7704643-7704643   | G | A | <i>STXBP2</i>  | NM_001127396:exon4:c.G196A:p.E66K,STXBP2   | Missense_Mutation | COSM3756502 |
| VSCC14 | chr19:9225976-9225976   | T | A | <i>OR7G1</i>   | NM_001005192:exon1:c.A464T:p.D155V         | Missense_Mutation |             |
| VSCC14 | chr19:10270708-10270708 | C | G | <i>DNMT1</i>   | NM_001379:exon14:c.G1027C:p.V343L,DNMT1    | Missense_Mutation | COSM1750802 |
| VSCC14 | chr19:10570165-10570165 | G | A | <i>PDE4A</i>   | NM_006202:exon4:c.G474A:p.M158I,PDE4A      | Missense_Mutation |             |
| VSCC14 | chr19:10577764-10577764 | G | C | <i>PDE4A</i>   | NM_006202:exon10:c.G1411C:p.E471Q,PDE4A    | Missense_Mutation |             |
| VSCC14 | chr19:10670161-10670161 | C | T | <i>KRII</i>    | NM_023008:exon12:c.G1086A:p.L362L          | Silent            |             |
| VSCC14 | chr19:10679248-10679248 | G | A | <i>CDKN2D</i>  | NM_001800:exon1:c.C82T:p.L28L,CDKN2D       | Silent            | COSM3756747 |
| VSCC14 | chr19:10690430-10690430 | C | T | <i>AP1M2</i>   | NM_001300887:exon7:c.G784A:p.G262S,AP1M2   | Missense_Mutation |             |
| VSCC14 | chr19:17295715-17295715 | G | C | <i>MYO9B</i>   | NM_001130065:exon17:c.G2415C:p.M805I,MYO9B | Missense_Mutation |             |
| VSCC14 | chr19:17664203-17664203 | C | T | <i>FAM129C</i> | NM_173544:exon16:c.C1925T:p.S642F          | Missense_Mutation | COSM5445694 |
| VSCC14 | chr19:18499422-18499422 | C | G | <i>GDF15</i>   | NM_004864:exon2:c.C604G:p.H202D            | Missense_Mutation |             |
| VSCC14 | chr19:30935443-30935443 | C | T | <i>ZNF536</i>  | NM_014717:exon2:c.C974T:p.T325M            | Missense_Mutation | COSM3107258 |
| VSCC14 | chr19:33183291-33183291 | G | A | <i>NUDT19</i>  | NM_001105570:exon1:c.G425A:p.R142Q         | Missense_Mutation |             |
| VSCC14 | chr19:35524755-35524755 | G | A | <i>SCN1B</i>   | NM_199037:exon3:c.G560A:p.R187H            | Missense_Mutation |             |
| VSCC14 | chr19:36244048-36244048 | C | T | <i>LIN37</i>   | NM_019104:exon6:c.C338T:p.T113M            | Missense_Mutation |             |



|        |                         |   |   |                 |                                            |                   |            |
|--------|-------------------------|---|---|-----------------|--------------------------------------------|-------------------|------------|
| VSCC14 | chr19:36370307-36370307 | G | A | <i>APLP1</i>    | NM_001024807:exon17:c.G1920A:p.E640E,APLP1 | Silent            |            |
| VSCC14 | chr19:38861333-38861333 | G | A | <i>CATSPERG</i> | NM_021185:exon29:c.G3381A:p.P1127P         | Silent            |            |
| VSCC14 | chr19:41711874-41711874 | C | T | <i>CYP2S1</i>   | NM_030622:exon8:c.C1176T:p.V392V           | Silent            |            |
| VSCC14 | chr19:45162101-45162101 | C | T | <i>PVR</i>      | NM_001135770:exon6:c.C1083T:p.I361I,PVR    | Silent            | COSM723162 |
| VSCC14 | chr19:47865911-47865911 | A | G | <i>DHX34</i>    | NM_014681:exon6:c.A1554G:p.P518P           | Silent            |            |
| VSCC14 | chr19:47876943-47876943 | C | T | <i>DHX34</i>    | NM_014681:exon9:c.C2050T:p.R684W           | Missense_Mutation |            |
| VSCC14 | chr19:48869139-48869139 | G | A | <i>SYNGR4</i>   | NM_012451:exon2:c.G40A:p.E14K              | Missense_Mutation |            |
| VSCC14 | chr19:50093166-50093166 | C | T | <i>PRRG2</i>    | NM_000951:exon6:c.C447T:p.L149L,PRRG2      | Silent            |            |
| VSCC14 | chr19:56052541-56052541 | C | T | <i>SBK3</i>     | NM_001199824:exon4:c.G751A:p.E251K         | Missense_Mutation |            |
| VSCC14 | chr19:56443383-56443383 | C | T | <i>NLRP13</i>   | NM_176810:exon1:c.G295A:p.E99K             | Missense_Mutation |            |
| VSCC14 | chr19:58574934-58574934 | G | A | <i>ZNF135</i>   | NM_001164527:exon3:c.G317A:p.R106K         | Missense_Mutation |            |
| VSCC14 | chr20:5963736-5963736   | G | A | <i>MCM8</i>     | NM_001281522:exon13:c.G1517A:p.R506K,MCM8  | Missense_Mutation |            |
| VSCC14 | chr20:23028960-23028960 | G | A | <i>THBD</i>     | NM_000361:exon1:c.C1182T:p.F394F           | Silent            |            |
| VSCC14 | chr20:30610466-30610466 | G | A | <i>CCM2L</i>    | NM_080625:exon6:c.G937A:p.A313T            | Missense_Mutation |            |
| VSCC14 | chr20:31829242-31829242 | G | C | <i>BPIFA1</i>   | NM_001243193:exon6:c.G633C:p.L211F,BPIFA1  | Missense_Mutation |            |
| VSCC14 | chr20:33337807-33337807 | G | A | <i>NCOA6</i>    | NM_001242539:exon9:c.C2191T:p.Q731X,NCOA6  | Nonsense_Mutation |            |
| VSCC14 | chr20:34061288-34061288 | G | C | <i>CEP250</i>   | NM_007186:exon13:c.G1299C:p.L433F          | Missense_Mutation |            |
| VSCC14 | chr20:44044866-44044866 | G | A | <i>PIGT</i>     | NM_001184728:exon1:c.G70A:p.E24K,PIGT      | Missense_Mutation |            |

|        |                         |   |   |                 |                                             |                   |                            |
|--------|-------------------------|---|---|-----------------|---------------------------------------------|-------------------|----------------------------|
| VSCC14 | chr20:44697266-44697266 | G | A | <i>NCOA5</i>    | NM_020967:exon4:c.C377T:p.S126F             | Missense_Mutation | COSM3759249                |
| VSCC14 | chr20:45918980-45918980 | G | A | <i>ZMYND8</i>   | NM_001281771:exon7:c.C624T:p.F208F,ZMYND8   | Silent            | COSM3842878                |
| VSCC14 | chr20:55048427-55048427 | C | T | <i>RTFDC1</i>   | NM_001283036:exon2:c.C140T:p.P47L,RTFDC1    | Missense_Mutation | COSM5426207                |
| VSCC14 | chr20:57415659-57415659 | C | G | <i>GNAS</i>     | NM_016592:exon1:c.C498G:p.L166L             | Silent            | <i>GNAS</i><br>COSM3759486 |
| VSCC14 | chr20:60511860-60511860 | C | T | <i>CDH4</i>     | NM_001252338:exon15:c.C2499T:p.Y833Y,CDH4   | Silent            |                            |
| VSCC14 | chr20:61512223-61512223 | G | A | <i>DIDO1</i>    | NM_001193369:exon16:c.C5085T:p.L1695L,DIDO1 | Silent            |                            |
| VSCC14 | chr20:62340238-62340238 | G | A | <i>ZGPAT</i>    | NM_001083113:exon2:c.G306A:p.E102E,ZGPAT    | Silent            |                            |
| VSCC14 | chr20:62729661-62729661 | C | T | <i>OPRL1</i>    | NM_000913:exon4:c.C622T:p.Q208X,OPRL1       | Nonsense_Mutation |                            |
| VSCC14 | chr21:34956969-34956969 | C | G | <i>DONSON</i>   | NM_017613:exon4:c.G712C:p.D238H             | Missense_Mutation |                            |
| VSCC14 | chr22:21407700-21407700 | C | T | <i>LRRC74B</i>  | NM_001291006:exon6:c.C784T:p.P262S          | Missense_Mutation |                            |
| VSCC14 | chr22:44681612-44681612 | A | G | <i>KIAA1644</i> | NM_001099294:exon4:c.T295C:p.L99L           | Silent            |                            |
| VSCC14 | chr22:46859789-46859789 | G | C | <i>CELSR1</i>   | NM_014246:exon2:c.C3998G:p.S1333C           | Missense_Mutation | COSM756478                 |
| VSCC14 | chrX:3241050-3241050    | G | A | <i>MXRA5</i>    | NM_015419:exon5:c.C2676T:p.S892S            | Silent            |                            |
| VSCC14 | chrX:3241791-3241791    | G | A | <i>MXRA5</i>    | NM_015419:exon5:c.C1935T:p.D645D            | Silent            |                            |
| VSCC14 | chrX:9622307-9622307    | G | A | <i>TBL1X</i>    | NM_001139467:exon4:c.G3A:p.M11,TBL1X        | Missense_Mutation |                            |
| VSCC14 | chrX:10535195-10535195  | C | T | <i>MID1</i>     | NM_001193278:exon1:c.G393A:p.V131V,MID1     | Silent            |                            |
| VSCC14 | chrX:12725742-12725742  | G | A | <i>FRMPD4</i>   | NM_014728:exon13:c.G1442A:p.R481Q           | Missense_Mutation |                            |
| VSCC14 | chrX:17743566-17743566  | C | T | <i>NHS</i>      | NM_001291868:exon6:c.C746T:p.S249F,NHS      | Missense_Mutation | COSM4855604                |

|        |                          |   |   |                |                                                |                       |             |
|--------|--------------------------|---|---|----------------|------------------------------------------------|-----------------------|-------------|
| VSCC14 | chrX:19983442-19983442   | C | G | <i>CXorf23</i> | NM_198279:exon3:c.G994C:p.E<br>332Q            | Missense_M<br>utation |             |
| VSCC14 | chrX:20148666-20148666   | C | T | <i>EIF1AX</i>  | NM_001412:exon6:c.G397A:p.D<br>133N            | Missense_M<br>utation | COSM3759331 |
| VSCC14 | chrX:23411776-23411776   | C | T | <i>PTCHD1</i>  | NM_173495:exon3:c.C2141T:p.S<br>714L           | Missense_M<br>utation |             |
| VSCC14 | chrX:24197618-24197618   | C | A | <i>ZFX</i>     | NM_001178084:exon3:c.C377A:<br>p.S126X,ZFX     | Nonsense_<br>Mutation | COSM3681570 |
| VSCC14 | chrX:37518870-37518870   | G | A | <i>LANCL3</i>  | NM_001170331:exon3:c.G853A:<br>p.E285K,LANCL3  | Missense_M<br>utation |             |
| VSCC14 | chrX:41029431-41029431   | G | A | <i>USP9X</i>   | NM_001039590:exon19:c.G2820<br>A:p.L940L,USP9X | Silent                |             |
| VSCC14 | chrX:49098528-49098528   | C | T | <i>CCDC22</i>  | NM_014008:exon3:c.C275T:p.P9<br>2L             | Missense_M<br>utation |             |
| VSCC14 | chrX:54987270-54987270   | G | A | <i>PFKFB1</i>  | NM_001271805:exon2:c.C109T:<br>p.L37L,PFKFB1   | Silent                |             |
| VSCC14 | chrX:69283116-69283116   | G | C | <i>OTUD6A</i>  | NM_207320:exon1:c.G742C:p.E<br>248Q            | Missense_M<br>utation |             |
| VSCC14 | chrX:100541591-100541591 | C | T | <i>TAF7L</i>   | NM_001168474:exon3:c.G117A:<br>p.M39I,TAF7L    | Missense_M<br>utation |             |
| VSCC14 | chrX:100880156-100880156 | G | A | <i>ARMCX3</i>  | NM_016607:exon5:c.G187A:p.D<br>63N,ARMCX3      | Missense_M<br>utation | COSM1579432 |
| VSCC14 | chrX:114424148-114424148 | G | A | <i>RBMXL3</i>  | NM_001145346:exon1:c.G144A:<br>p.S48S          | Silent                | COSM3396095 |
| VSCC14 | chrX:128692624-128692624 | G | C | <i>OCRL</i>    | NM_000276:exon7:c.G454C:p.E<br>152Q,OCRL       | Missense_M<br>utation |             |
| VSCC14 | chrX:132161755-132161755 | A | G | <i>USP26</i>   | NM_031907:exon1:c.T494C:p.L1<br>65S            | Missense_M<br>utation |             |
| VSCC14 | chrX:138697188-138697188 | G | C | <i>MCF2</i>    | NM_001171877:exon9:c.C1098G<br>:p.L366L,MCF2   | Silent                |             |
| VSCC14 | chrX:152159412-152159412 | G | C | <i>PNMA5</i>   | NM_001103150:exon2:c.C731G:<br>p.S244C,PNMA5   | Missense_M<br>utation |             |
| VSCC14 | chrX:153236195-153236195 | G | A | <i>HCFC1</i>   | NM_005334:exon1:c.C97T:p.R33<br>C              | Missense_M<br>utation |             |
| VSCC14 | chrX:154261820-154261820 | C | T | <i>FUNDC2</i>  | NM_023934:exon2:c.C276T:p.V<br>92V             | Silent                | COSM5503033 |

|        |                          |                     |   |                |                                                      |                   |               |            |
|--------|--------------------------|---------------------|---|----------------|------------------------------------------------------|-------------------|---------------|------------|
| VSCC14 | chr16:9916274-9916274    | C                   | G | <i>GRIN2A</i>  | NM_001134407:exon10:c.G2015C:p.R672T,GRIN2A          | Missense_Mutation | <i>GRIN2A</i> |            |
| VSCC14 | chr8:42865534-42865534   | G                   | C | <i>HOOK3</i>   | NM_032410:exon19:c.G1825C:p.E609Q                    | Missense_Mutation | <i>HOOK3</i>  |            |
| VSCC14 | chr19:10602885-10602885  | G                   | A | <i>KEAP1</i>   | NM_012289:exon3:c.C693T:p.L231L,KEAP1                | Silent            | <i>KEAP1</i>  |            |
| VSCC14 | chr5:176721198-176721198 | T                   | C | <i>NSD1</i>    | NM_022455:exon23:c.T6829C:p.L2277L,NSD1              | Silent            | <i>NSD1</i>   |            |
| VSCC14 | chr19:14211675-14211675  | C                   | G | <i>PRKACA</i>  | NM_001304349:exon5:c.G610C:p.E204Q,PRKACA            | Missense_Mutation | <i>PRKACA</i> |            |
| VSCC14 | chr2:109382170-109382170 | A                   | G | <i>RANBP2</i>  | NM_006267:exon20:c.A5175G:p.E1725E                   | Silent            | <i>RANBP2</i> | COSM127542 |
| VSCC14 | chr17:78325539-78325539  | C                   | T | <i>RNF213</i>  | NM_001256071:exon32:c.C10239T:p.F3413F               | Silent            | <i>RNF213</i> |            |
| VSCC14 | chr17:30325985-30325985  | C                   | G | <i>SUZ12</i>   | NM_015355:exon16:c.C2183G:p.S728X                    | Nonsense_Mutation | <i>SUZ12</i>  |            |
| VSCC14 | chr4:106157728-106157728 | G                   | C | <i>TET2</i>    | NM_001127208:exon3:c.G2629C:p.D877H,TET2             | Missense_Mutation | <i>TET2</i>   |            |
| VSCC14 | chr9:135781372-135781372 | C                   | T | <i>TSC1</i>    | NM_001162427:exon14:c.G1440A:p.V480V,TSC1            | Silent            | <i>TSC1</i>   |            |
| VSCC14 | chr18:22806915-22806915  | C                   | G | <i>ZNF521</i>  | NM_001308225:exon3:c.G307C:p.E103Q,ZNF521            | Missense_Mutation | <i>ZNF521</i> |            |
| VSCC14 | chr5:156479558-156479572 | TTGGAACA<br>GTCGTCA | - | <i>HAVCR1</i>  | NM_012206:exon3:c.473_487del:p.158_163del,HAVCR1     | In_Frame_Deletion |               |            |
| VSCC14 | chr11:6411936-6411941    | GCTGGC              | - | <i>SMPD1</i>   | NM_000543:exon1:c.108_113del:p.36_38del,SMPD1        | In_Frame_Deletion |               |            |
| VSCC14 | chr19:41173893-41173898  | TGCTGT              | - | <i>NUMBL</i>   | NM_001289979:exon9:c.1182_1187del:p.394_396del,NUMBL | In_Frame_Deletion |               |            |
| VSCC15 | chr3:46501149-46501149   | A                   | C | <i>LTF</i>     | NM_001199149:exon2:c.T72G:p.I24M,LTF                 | Missense_Mutation |               |            |
| VSCC15 | chr5:169310459-169310459 | A                   | C | <i>FAM196B</i> | NM_001129891:exon2:c.T444G:p.L148L                   | Silent            |               |            |
| VSCC15 | chr19:38797565-38797565  | A                   | C | <i>YIF1B</i>   | NM_001145463:exon8:c.T846G:p.G282G                   | Silent            |               |            |
| VSCC15 | chr3:131261423-131261423 | A                   | G | <i>CPNE4</i>   | NM_001289112:exon15:c.T1571C:p.V524A,CPNE4           | Missense_Mutation |               |            |

|        |                          |   |   |                 |                                              |                   |             |
|--------|--------------------------|---|---|-----------------|----------------------------------------------|-------------------|-------------|
| VSCC15 | chr8:103573033-103573033 | A | G | <i>ODF1</i>     | NM_024410:exon2:c.A674G:p.N225S              | Missense_Mutation |             |
| VSCC15 | chr12:7917942-7917942    | A | G | <i>NANOGNB</i>  | NM_001145465:exon1:c.A61G:p.R21G             | Missense_Mutation |             |
| VSCC15 | chr19:50461940-50461940  | A | G | <i>SIGLEC11</i> | NM_001135163:exon7:c.T1323C:p.P441P,SIGLEC11 | Silent            |             |
| VSCC15 | chr19:36221450-36221450  | A | T | <i>KMT2B</i>    | NM_014727:exon25:c.A5209T:p.I1737F           | Missense_Mutation |             |
| VSCC15 | chr3:195486080-195486080 | C | A | <i>MUC4</i>     | NM_138297:exon15:c.G2040T:p.G680G,MUC4       | Silent            |             |
| VSCC15 | chr5:54965698-54965698   | C | A | <i>SLC38A9</i>  | NM_001258286:exon3:c.G67T:p.D23Y,SLC38A9     | Missense_Mutation |             |
| VSCC15 | chr5:140223297-140223297 | C | A | <i>PCDHA8</i>   | NM_018911:exon1:c.C2391A:p.L797L,PCDHA8      | Silent            |             |
| VSCC15 | chr5:148408072-148408072 | C | A | <i>SH3TC2</i>   | NM_024577:exon11:c.G1223T:p.W408L            | Missense_Mutation |             |
| VSCC15 | chr9:19516295-19516295   | C | A | <i>SLC24A2</i>  | NM_001193288:exon9:c.G1791T:p.L597L,SLC24A2  | Silent            |             |
| VSCC15 | chrX:153660741-153660741 | C | A | <i>ATP6AP1</i>  | NM_001183:exon4:c.C493A:p.R165R              | Silent            |             |
| VSCC15 | chr1:115144766-115144766 | C | G | <i>DENND2C</i>  | NM_198459:exon9:c.G1546C:p.G516R,DENND2C     | Missense_Mutation |             |
| VSCC15 | chr1:161132430-161132430 | C | G | <i>USP21</i>    | NM_012475:exon5:c.C807G:p.L269L,USP21        | Silent            |             |
| VSCC15 | chr1:230933954-230933954 | C | G | <i>CAPN9</i>    | NM_016452:exon18:c.C1956G:p.L652L,CAPN9      | Silent            |             |
| VSCC15 | chr4:40440226-40440226   | C | G | <i>RBM47</i>    | NM_019027:exon3:c.G685C:p.D229H,RBM47        | Missense_Mutation |             |
| VSCC15 | chr9:34290330-34290330   | C | G | <i>KIF24</i>    | NM_194313:exon5:c.G969C:p.M323I              | Missense_Mutation |             |
| VSCC15 | chr9:71840248-71840248   | C | G | <i>TJP2</i>     | NM_001170415:exon6:c.C993G:p.I331M,TJP2      | Missense_Mutation |             |
| VSCC15 | chr11:6662229-6662229    | C | G | <i>DCHS1</i>    | NM_003737:exon2:c.G616C:p.E206Q              | Missense_Mutation | COSM4966878 |
| VSCC15 | chr15:43102856-43102856  | C | G | <i>TTBK2</i>    | NM_173500:exon9:c.G778C:p.D260H              | Missense_Mutation |             |

|        |                          |   |   |                |                                            |                   |               |
|--------|--------------------------|---|---|----------------|--------------------------------------------|-------------------|---------------|
| VSCC15 | chr15:52548913-52548913  | C | G | <i>MYO5C</i>   | NM_018728:exon11:c.G1318C:p.E440Q          | Missense_Mutation |               |
| VSCC15 | chr15:63935220-63935220  | C | G | <i>HERC1</i>   | NM_003922:exon59:c.G11369C:p.G3790A        | Missense_Mutation |               |
| VSCC15 | chr19:7677147-7677147    | C | G | <i>CAMSAP3</i> | NM_020902:exon11:c.C1768G:p.P590A,CAMSAP3  | Missense_Mutation | COSM415348    |
| VSCC15 | chr19:17113098-17113098  | C | G | <i>CPAMD8</i>  | NM_015692:exon9:c.G877C:p.E293Q            | Missense_Mutation |               |
| VSCC15 | chr19:17394462-17394462  | C | G | <i>ANKLE1</i>  | NM_001278443:exon5:c.C1018G:p.L340V,ANKLE1 | Missense_Mutation | COSM1128432   |
| VSCC15 | chr19:42510889-42510889  | C | G | <i>GRIK5</i>   | NM_001301030:exon15:c.G1945C:p.E649Q,GRIK5 | Missense_Mutation |               |
| VSCC15 | chr2:178096619-178096619 | C | G | <i>NFE2L2</i>  | NM_001313902:exon4:c.G622C:p.E208Q,NFE2L2  | Missense_Mutation | <i>NFE2L2</i> |
| VSCC15 | chr19:14626848-14626848  | C | T | <i>DNAJB1</i>  | NM_001300914:exon3:c.G627A:p.E209E,DNAJB1  | Silent            | <i>DNAJB1</i> |
| VSCC15 | chr4:187518169-187518169 | C | T | <i>FAT1</i>    | NM_005245:exon25:c.G12525A:p.W4175X        | Nonsense_Mutation | <i>FAT1</i>   |
| VSCC15 | chr1:205814465-205814465 | C | T | <i>PM20D1</i>  | NM_152491:exon3:c.G477A:p.K159K            | Silent            |               |
| VSCC15 | chr2:87013070-87013070   | C | T | <i>CD8A</i>    | NM_171827:exon5:c.G570A:p.K190K,CD8A       | Silent            |               |
| VSCC15 | chr3:49063786-49063786   | C | T | <i>IMPDH2</i>  | NM_000884:exon9:c.G977A:p.G326E            | Missense_Mutation |               |
| VSCC15 | chr3:51387761-51387761   | C | T | <i>DOCK3</i>   | NM_004947:exon40:c.C4045T:p.R1349C         | Missense_Mutation |               |
| VSCC15 | chr3:81548316-81548316   | C | T | <i>GBE1</i>    | NM_000158:exon15:c.G1997A:p.S666N          | Missense_Mutation |               |
| VSCC15 | chr3:169524687-169524687 | C | T | <i>LRRC34</i>  | NM_001172779:exon5:c.G477A:p.M159I,LRRC34  | Missense_Mutation | COSM4541938   |
| VSCC15 | chr4:107258141-107258141 | C | T | <i>AIMP1</i>   | NM_001142415:exon6:c.C719T:p.A240V,AIMP1   | Missense_Mutation | COSM5484551   |
| VSCC15 | chr5:108281916-108281916 | C | T | <i>FER</i>     | NM_001308031:exon2:c.C215T:p.S72F,FER      | Missense_Mutation |               |
| VSCC15 | chr8:72184069-72184069   | C | T | <i>EYA1</i>    | NM_172060:exon8:c.G791A:p.R264Q,EYA1       | Missense_Mutation |               |

|        |                           |   |   |                 |                                           |                   |                |
|--------|---------------------------|---|---|-----------------|-------------------------------------------|-------------------|----------------|
| VSCC15 | chr8:133187745-133187745  | C | T | <i>KCNQ3</i>    | NM_001204824:exon5:c.G528A:p.M176I,KCNQ3  | Missense_Mutation |                |
| VSCC15 | chr9:84267172-84267172    | C | T | <i>TLE1</i>     | NM_001303103:exon6:c.G329A:p.R110H,TLE1   | Missense_Mutation |                |
| VSCC15 | chr10:50819656-50819656   | C | T | <i>SLC18A3</i>  | NM_003055:exon1:c.C870T:p.Y290Y           | Silent            |                |
| VSCC15 | chr11:18387412-18387412   | C | T | <i>GTF2H1</i>   | NM_005316:exon15:c.C1643T:p.T548M,GTF2H1  | Missense_Mutation |                |
| VSCC15 | chr11:57798927-57798927   | C | T | <i>OR6Q1</i>    | NM_001005186:exon1:c.C503T:p.S168F        | Missense_Mutation |                |
| VSCC15 | chr11:109294575-109294575 | C | T | <i>C11orf87</i> | NM_207645:exon2:c.C216T:p.F72F            | Silent            | COSM1254337    |
| VSCC15 | chr12:64377792-64377792   | C | T | <i>SRGAP1</i>   | NM_020762:exon2:c.C133T:p.L45F            | Missense_Mutation | COSM4388281    |
| VSCC15 | chr13:102250584-102250584 | C | T | <i>ITGBL1</i>   | NM_001271754:exon6:c.C527T:p.T176M,ITGBL1 | Missense_Mutation |                |
| VSCC15 | chr14:59789628-59789628   | C | T | <i>DAAMI</i>    | NM_014992:exon5:c.C459T:p.I153I,DAAM1     | Silent            |                |
| VSCC15 | chr16:20422825-20422825   | C | T | <i>ACSM5</i>    | NM_017888:exon2:c.C19T:p.H7Y              | Missense_Mutation |                |
| VSCC15 | chr17:29187544-29187544   | C | T | <i>ATAD5</i>    | NM_024857:exon10:c.C3050T:p.S1017L        | Missense_Mutation | COSM4957837    |
| VSCC15 | chr18:54291550-54291550   | C | T | <i>TXNL1</i>    | NM_004786:exon3:c.G338A:p.S113N           | Missense_Mutation |                |
| VSCC15 | chr18:78005224-78005224   | C | T | <i>PARD6G</i>   | NM_032510:exon1:c.G8A:p.R3Q               | Missense_Mutation |                |
| VSCC15 | chr20:48808256-48808256   | C | T | <i>CEBPB</i>    | NM_001285878:exon1:c.C617T:p.S206L,CEBPB  | Missense_Mutation |                |
| VSCC15 | chrX:71521765-71521765    | C | T | <i>CITED1</i>   | NM_001144886:exon3:c.G390A:p.A130A,CITED1 | Silent            |                |
| VSCC15 | chrX:154129688-154129688  | C | T | <i>F8</i>       | NM_000132:exon20:c.G6145A:p.G2049R        | Missense_Mutation |                |
| VSCC15 | chr11:46332704-46332704   | G | A | <i>CREB3L1</i>  | NM_052854:exon5:c.G717A:p.T239T           | Silent            | <i>CREB3L1</i> |
| VSCC15 | chr1:151508275-151508275  | G | A | <i>CGN</i>      | NM_020770:exon18:c.G3098A:p.R1033Q        | Missense_Mutation |                |

|        |                           |   |   |                 |                                               |                   |             |
|--------|---------------------------|---|---|-----------------|-----------------------------------------------|-------------------|-------------|
| VSCC15 | chr2:47797260-47797260    | G | A | <i>KCNK12</i>   | NM_022055:exon1:c.C211T:p.R71C                | Missense_Mutation |             |
| VSCC15 | chr2:74642035-74642035    | G | A | <i>C2orf81</i>  | NM_001316766:exon2:c.C984T:p.L328L,C2orf81    | Silent            | COSM3815639 |
| VSCC15 | chr2:210694093-210694093  | G | A | <i>UNC80</i>    | NM_032504:exon15:c.G2616A:p.P872P,UNC80       | Silent            |             |
| VSCC15 | chr2:217340008-217340008  | G | A | <i>SMARCAL1</i> | NM_001127207:exon15:c.G2261A:p.R754H,SMARCAL1 | Missense_Mutation |             |
| VSCC15 | chr3:189038543-189038543  | G | A | <i>TPRG1</i>    | NM_198485:exon6:c.G762A:p.L254L               | Silent            | COSM5499309 |
| VSCC15 | chr4:6304108-6304108      | G | A | <i>WFS1</i>     | NM_001145853:exon8:c.G2586A:p.K862K,WFS1      | Silent            |             |
| VSCC15 | chr4:68442940-68442940    | G | A | <i>STAP1</i>    | NM_012108:exon4:c.G326A:p.G109E               | Missense_Mutation |             |
| VSCC15 | chr4:83839109-83839109    | G | A | <i>THAP9</i>    | NM_024672:exon5:c.G1744A:p.E582K              | Missense_Mutation | COSM404119  |
| VSCC15 | chr5:24535262-24535262    | G | A | <i>CDH10</i>    | NM_001317224:exon4:c.C773T:p.T258M,CDH10      | Missense_Mutation | COSM161187  |
| VSCC15 | chr5:147863871-147863871  | G | A | <i>HTR4</i>     | NM_001040173:exon6:c.C1148T:p.S383L           | Missense_Mutation |             |
| VSCC15 | chr7:94034044-94034044    | G | A | <i>COL1A2</i>   | NM_000089:exon8:c.G364A:p.E122K               | Missense_Mutation | COSM480     |
| VSCC15 | chr9:96847646-96847646    | G | A | <i>PTPDC1</i>   | NM_001253829:exon2:c.G358A:p.E120K,PTPDC1     | Missense_Mutation | COSM120006  |
| VSCC15 | chr9:138645822-138645822  | G | A | <i>KCNT1</i>    | NM_001272003:exon4:c.G330A:p.S110S,KCNT1      | Silent            |             |
| VSCC15 | chr10:13629098-13629098   | G | A | <i>PRPF18</i>   | NM_003675:exon1:c.G12A:p.L4L                  | Silent            |             |
| VSCC15 | chr10:125805631-125805631 | G | A | <i>CHST15</i>   | NM_001270764:exon2:c.C98T:p.A33V,CHST15       | Missense_Mutation |             |
| VSCC15 | chr11:1092999-1092999     | G | A | <i>MUC2</i>     | NM_002457:exon30:c.G4818A:p.T1606T            | Silent            |             |
| VSCC15 | chr11:6643897-6643897     | G | A | <i>DCHS1</i>    | NM_003737:exon21:c.C9010T:p.H3004Y            | Missense_Mutation |             |
| VSCC15 | chr11:36248978-36248978   | G | A | <i>LDLRAD3</i>  | NM_001304263:exon4:c.G651A:p.Q217Q,LDLRAD3    | Silent            |             |



|        |                          |   |   |                 |                                              |                   |              |
|--------|--------------------------|---|---|-----------------|----------------------------------------------|-------------------|--------------|
| VSCC15 | chr11:59807960-59807960  | G | A | <i>OOSP2</i>    | NM_173801:exon1:c.G28A:p.A10T                | Missense_Mutation |              |
| VSCC15 | chr11:65988142-65988142  | G | A | <i>PACSI</i>    | NM_018026:exon9:c.G1079A:p.R360Q             | Missense_Mutation |              |
| VSCC15 | chr14:68157084-68157084  | G | A | <i>RDH11</i>    | NM_016026:exon5:c.C509T:p.S170L              | Missense_Mutation |              |
| VSCC15 | chr14:99959023-99959023  | G | A | <i>CCNK</i>     | NM_001099402:exon2:c.G9A:p.E3E               | Silent            | COSM3762959  |
| VSCC15 | chr16:30779754-30779754  | G | A | <i>RNF40</i>    | NM_001207034:exon11:c.G1582A:p.A528T,RNF40   | Missense_Mutation |              |
| VSCC15 | chr17:47925365-47925365  | G | A | <i>TAC4</i>     | NM_001077503:exon1:c.C15T:p.L5L,TAC4         | Silent            |              |
| VSCC15 | chr17:48668797-48668797  | G | A | <i>CACNA1G</i>  | NM_001256324:exon11:c.G2455A:p.V819M,CACNA1G | Missense_Mutation |              |
| VSCC15 | chr17:79219452-79219452  | G | A | <i>SLC38A10</i> | NM_001037984:exon16:c.C3264T:p.A1088A        | Silent            |              |
| VSCC15 | chr18:9221985-9221985    | G | A | <i>ANKRD12</i>  | NM_001083625:exon7:c.G862A:p.E288K,ANKRD12   | Missense_Mutation |              |
| VSCC15 | chrX:37028209-37028209   | G | A | <i>FAM47C</i>   | NM_001013736:exon1:c.G1726A:p.D576N          | Missense_Mutation |              |
| VSCC15 | chrX:153928296-153928296 | G | A | <i>GAB3</i>     | NM_001081573:exon5:c.C1108T:p.R370W,GAB3     | Missense_Mutation |              |
| VSCC15 | chr7:151949693-151949693 | G | A | <i>KMT2C</i>    | NM_170606:exon10:c.C1407T:p.F469F            | Silent            | <i>KMT2C</i> |
| VSCC15 | chr17:7577539-7577539    | G | A | <i>TP53</i>     | NM_001126115:exon3:c.C346T:p.R116W,TP53      | Missense_Mutation | <i>TP53</i>  |
| VSCC15 | chr7:98548550-98548550   | G | A | <i>TRRAP</i>    | NM_003496:exon37:c.G5311A:p.E1771K,TRRAP     | Missense_Mutation | <i>TRRAP</i> |
| VSCC15 | chr8:103424438-103424438 | G | A | <i>UBR5</i>     | NM_001282873:exon1:c.C25T:p.H9Y,UBR5         | Missense_Mutation | <i>UBR5</i>  |
| VSCC15 | chr19:18864392-18864392  | G | C | <i>CRTC1</i>    | NM_015321:exon6:c.G621C:p.K207N,CRTC1        | Missense_Mutation | <i>CRTC1</i> |
| VSCC15 | chr2:131520831-131520831 | G | C | <i>AMER3</i>    | NM_001105193:exon2:c.G1186C:p.E396Q,AMER3    | Missense_Mutation |              |
| VSCC15 | chr2:234358641-234358641 | G | C | <i>DGKD</i>     | NM_003648:exon15:c.G1770C:p.Q590H,DGKD       | Missense_Mutation |              |

|        |                          |   |   |                |                                             |                   |             |
|--------|--------------------------|---|---|----------------|---------------------------------------------|-------------------|-------------|
| VSCC15 | chr4:90816739-90816739   | G | C | <i>MMRN1</i>   | NM_007351:exon1:c.G617C:p.R206T             | Missense_Mutation |             |
| VSCC15 | chr5:74017518-74017518   | G | C | <i>GFM2</i>    | NM_170691:exon20:c.C2161G:p.Q721E,GFM2      | Missense_Mutation |             |
| VSCC15 | chr8:37794853-37794853   | G | C | <i>GOT1L1</i>  | NM_152413:exon4:c.C461G:p.S154C             | Missense_Mutation |             |
| VSCC15 | chr8:103573037-103573037 | G | C | <i>ODF1</i>    | NM_024410:exon2:c.G678C:p.P226P             | Silent            |             |
| VSCC15 | chr8:124714948-124714948 | G | C | <i>ANXA13</i>  | NM_004306:exon3:c.C120G:p.I40M,ANXA13       | Missense_Mutation |             |
| VSCC15 | chr8:145058924-145058924 | G | C | <i>PARP10</i>  | NM_032789:exon5:c.C1246G:p.P416A            | Missense_Mutation |             |
| VSCC15 | chr9:4706017-4706017     | G | C | <i>CDC37L1</i> | NM_017913:exon7:c.G919C:p.D307H             | Missense_Mutation |             |
| VSCC15 | chr9:35560063-35560063   | G | C | <i>RUSC2</i>   | NM_001135999:exon10:c.G3426C;p.L1142L,RUSC2 | Silent            |             |
| VSCC15 | chr10:70863813-70863813  | G | C | <i>SRGN</i>    | NM_002727:exon3:c.G414C:p.R138S             | Missense_Mutation |             |
| VSCC15 | chr10:75535384-75535384  | G | C | <i>FUT11</i>   | NM_173540:exon3:c.G1420C:p.E474Q            | Missense_Mutation |             |
| VSCC15 | chr11:45245922-45245922  | G | C | <i>PRDM11</i>  | NM_001256695:exon7:c.G897C:p.K299N,PRDM11   | Missense_Mutation |             |
| VSCC15 | chr12:46320143-46320143  | G | C | <i>SCAF11</i>  | NM_004719:exon11:c.C3341G:p.S1114C          | Missense_Mutation |             |
| VSCC15 | chr14:92349337-92349337  | G | C | <i>FBLN5</i>   | NM_006329:exon8:c.C823G:p.P275A             | Missense_Mutation |             |
| VSCC15 | chr16:88499194-88499194  | G | C | <i>ZNF469</i>  | NM_001127464:exon2:c.G5232C;p.Q1744H        | Missense_Mutation | COSM1400913 |
| VSCC15 | chr21:44841623-44841623  | G | C | <i>SIK1</i>    | NM_173354:exon5:c.C394G:p.Q132E             | Missense_Mutation |             |
| VSCC15 | chr1:67155939-67155939   | G | T | <i>SGIP1</i>   | NM_001308203:exon14:c.G913T;p.E305X,SGIP1   | Nonsense_Mutation |             |
| VSCC15 | chr1:186055395-186055395 | G | T | <i>HMCN1</i>   | NM_031935:exon58:c.G8902T:p.G2968C          | Missense_Mutation |             |
| VSCC15 | chr12:16516738-16516738  | G | T | <i>MGST1</i>   | NM_001260511:exon4:c.G231T;p.L77L,MGST1     | Silent            |             |

|        |                           |            |     |                 |                                                  |                   |                 |             |
|--------|---------------------------|------------|-----|-----------------|--------------------------------------------------|-------------------|-----------------|-------------|
| VSCC15 | chr14:23502602-23502602   | G          | T   | <i>PSMB5</i>    | NM_001130725:exon2:c.C171A:p.I57I,PSMB5          | Silent            |                 | COSM2153606 |
| VSCC15 | chr14:24975734-24975734   | G          | T   | <i>CMA1</i>     | NM_001836:exon3:c.C286A:p.Q96K                   | Missense_Mutation |                 |             |
| VSCC15 | chr8:67590068-67590068    | T          | C   | <i>C8orf44</i>  | NM_019607:exon2:c.T125C:p.M42T                   | Missense_Mutation |                 |             |
| VSCC15 | chr11:55433324-55433324   | T          | C   | <i>OR4C6</i>    | NM_001004704:exon1:c.T682C:p.S228P               | Missense_Mutation |                 |             |
| VSCC15 | chr8:31497799-31497799    | -          | GGC | <i>NRG1</i>     | NM_013962:exon1:c.299_300insGGC:p.K100delinsKA   | In_Frame_Ins      | <i>NRG1</i>     |             |
| VSCC15 | chr6:1611802-1611802      | -          | GGC | <i>FOXC1</i>    | NM_001453:exon1:c.1122_1123insGGC:p.S374delinsSG | In_Frame_Ins      |                 |             |
| VSCC15 | chr19:14584399-14584408   | GAGGCCGGGG | -   | <i>PTGER1</i>   | NM_000955:exon2:c.725_734del:p.P242fs            | Frame_Shift_Del   |                 | COSM1294143 |
| VSCC5  | chr2:216203544-216203544  | C          | T   | <i>ATIC</i>     | NM_004044:exon12:c.C1141T:p.L381F                | Missense_Mutation | <i>ATIC</i>     |             |
| VSCC5  | chr4:153247366-153247366  | C          | T   | <i>FBXW7</i>    | NM_001013415:exon9:c.G1082A:p.R361Q,FBXW7        | Missense_Mutation | <i>FBXW7</i>    | COSM4002948 |
| VSCC5  | chr14:102550272-102550272 | G          | A   | <i>HSP90AA1</i> | NM_005348:exon7:c.C1196T:p.S399F,HSP90AA1        | Missense_Mutation | <i>HSP90AA1</i> |             |
| VSCC5  | chr1:976591-976591        | G          | A   | <i>AGRN</i>     | NM_198576:exon5:c.G766A:p.G256S                  | Missense_Mutation |                 |             |
| VSCC5  | chr1:2103518-2103518      | C          | T   | <i>PRKCZ</i>    | NM_001033581:exon9:c.C537T:p.I179I,PRKCZ         | Silent            |                 |             |
| VSCC5  | chr1:70833334-70833334    | A          | T   | <i>HHLA3</i>    | NM_001031693:exon3:c.A289T:p.K97X                | Nonsense_Mutation |                 |             |
| VSCC5  | chr1:153635209-153635209  | C          | T   | <i>ILF2</i>     | NM_001267809:exon13:c.G870A:p.K290K,ILF2         | Silent            |                 |             |
| VSCC5  | chr1:155264314-155264314  | G          | C   | <i>PKLR</i>     | NM_000298:exon6:c.C924G:p.I308M,PKLR             | Missense_Mutation |                 |             |
| VSCC5  | chr1:156879867-156879867  | C          | T   | <i>PEAR1</i>    | NM_001080471:exon13:c.C1645T:p.H549Y             | Missense_Mutation |                 |             |
| VSCC5  | chr1:159825853-159825853  | A          | G   | <i>VSIG8</i>    | NM_001013661:exon6:c.T791C:p.V264A               | Missense_Mutation |                 | COSM1070632 |
| VSCC5  | chr1:167666379-167666379  | G          | A   | <i>RCSD1</i>    | NM_052862:exon6:c.G518A:p.R173Q                  | Missense_Mutation |                 |             |

|       |                          |   |   |                 |                                            |                   |             |
|-------|--------------------------|---|---|-----------------|--------------------------------------------|-------------------|-------------|
| VSCC5 | chr1:221057810-221057810 | G | A | <i>HLX</i>      | NM_021958:exon4:c.G1231A:p.V411I           | Missense_Mutation | COSM225565  |
| VSCC5 | chr1:223717495-223717495 | A | G | <i>CAPN8</i>    | UNKNOWN                                    | unknown           |             |
| VSCC5 | chr1:231061312-231061312 | C | T | <i>TTC13</i>    | NM_001122835:exon11:c.G1380A:p.L460L,TTC13 | Silent            |             |
| VSCC5 | chr2:27436149-27436149   | G | C | <i>ATRAID</i>   | NM_001170795:exon2:c.G204C:p.Q68H,ATRAID   | Missense_Mutation |             |
| VSCC5 | chr2:37494624-37494624   | T | C | <i>PRKD3</i>    | NM_005813:exon13:c.A1833G:p.R611R          | Silent            | COSM3982162 |
| VSCC5 | chr2:47135043-47135043   | A | G | <i>MCFD2</i>    | NM_001171509:exon2:c.T59C:p.L20S,MCFD2     | Missense_Mutation | COSM5571621 |
| VSCC5 | chr2:72606985-72606985   | C | T | <i>EXOC6B</i>   | NM_015189:exon19:c.G1995A:p.Q665Q          | Silent            |             |
| VSCC5 | chr2:168067325-168067325 | G | A | <i>XIRP2</i>    | NM_001079810:exon4:c.G643A:p.E215K,XIRP2   | Missense_Mutation |             |
| VSCC5 | chr2:206305308-206305308 | G | C | <i>PARD3B</i>   | NM_057177:exon19:c.G2749C:p.G917R,PARD3B   | Missense_Mutation | COSM354585  |
| VSCC5 | chr2:211476857-211476857 | G | A | <i>CPS1</i>     | NM_001122634:exon10:c.G1055A:p.R352H,CPS1  | Missense_Mutation |             |
| VSCC5 | chr3:42727708-42727708   | C | T | <i>KLHL40</i>   | NM_152393:exon1:c.C598T:p.R200W            | Missense_Mutation |             |
| VSCC5 | chr3:108474644-108474644 | C | T | <i>RETNLB</i>   | NM_032579:exon3:c.G317A:p.R106H            | Missense_Mutation |             |
| VSCC5 | chr3:156645313-156645313 | A | T | <i>LEKRI</i>    | NM_001004316:exon5:c.A479T:p.Y160F         | Missense_Mutation |             |
| VSCC5 | chr3:164905756-164905756 | C | T | <i>SLITRK3</i>  | NM_014926:exon2:c.G2863A:p.E955K           | Missense_Mutation | COSM5546286 |
| VSCC5 | chr3:184020267-184020267 | C | T | <i>PSMD2</i>    | NM_001278708:exon4:c.C424T:p.L142F,PSMD2   | Missense_Mutation |             |
| VSCC5 | chr3:188933142-188933142 | A | G | <i>TPRG1</i>    | NM_198485:exon3:c.A272G:p.E91G             | Missense_Mutation |             |
| VSCC5 | chr3:196288193-196288193 | C | T | <i>WDR53</i>    | NM_182627:exon3:c.G154A:p.D52N             | Missense_Mutation | COSM1456180 |
| VSCC5 | chr4:436658-436658       | A | T | <i>ZNF721</i>   | NM_133474:exon3:c.T1598A:p.V533E           | Missense_Mutation |             |
| VSCC5 | chr4:123239378-123239378 | G | A | <i>KIAA1109</i> | NM_015312:exon61:c.G10747A:p.D3583N        | Missense_Mutation |             |

|       |                          |   |   |                |                                            |                   |             |
|-------|--------------------------|---|---|----------------|--------------------------------------------|-------------------|-------------|
| VSCC5 | chr4:140811084-140811084 | C | T | <i>MAML3</i>   | NM_018717:exon2:c.G1506A:p.Q502Q           | Silent            |             |
| VSCC5 | chr4:156135601-156135601 | C | T | <i>NPY2R</i>   | NM_000910:exon2:c.C510T:p.G170G            | Silent            |             |
| VSCC5 | chr4:186545218-186545218 | C | T | <i>SORBS2</i>  | NM_001145674:exon7:c.G1065A;p.K355K,SORBS2 | Silent            |             |
| VSCC5 | chr4:189060957-189060957 | G | T | <i>TRIML1</i>  | NM_178556:exon1:c.G245T:p.R82L             | Missense_Mutation |             |
| VSCC5 | chr5:14498248-14498248   | G | A | <i>TRIO</i>    | NM_007118:exon52:c.G8098A:p.E2700K         | Missense_Mutation |             |
| VSCC5 | chr5:42810837-42810837   | A | G | <i>SEPP1</i>   | UNKNOWN                                    | unknown           | COSM5050200 |
| VSCC5 | chr5:76259175-76259175   | C | T | <i>CRHBP</i>   | NM_001882:exon6:c.C701T:p.S234L            | Missense_Mutation |             |
| VSCC5 | chr5:79616145-79616145   | C | T | <i>SPZI</i>    | NM_032567:exon1:c.C111T:p.F37F             | Silent            |             |
| VSCC5 | chr5:140201459-140201459 | G | A | <i>PCDHA5</i>  | NM_018908:exon1:c.G99A:p.S33S,PCDHA5       | Silent            |             |
| VSCC5 | chr5:140221195-140221195 | G | C | <i>PCDHA8</i>  | NM_018911:exon1:c.G289C:p.G97R,PCDHA8      | Missense_Mutation | COSM4036374 |
| VSCC5 | chr5:140558419-140558419 | G | A | <i>PCDHB8</i>  | NM_019120:exon1:c.G804A:p.T268T            | Silent            |             |
| VSCC5 | chr5:140573542-140573542 | G | A | <i>PCDHB10</i> | NM_018930:exon1:c.G1417A:p.V473I           | Missense_Mutation |             |
| VSCC5 | chr5:172096848-172096848 | G | A | <i>NEURL1B</i> | NM_001142651:exon2:c.G92A:p.R31Q,NEURL1B   | Missense_Mutation |             |
| VSCC5 | chr6:35715133-35715133   | C | T | <i>ARMC12</i>  | NM_001286574:exon4:c.C540T:p.P180P,ARMC12  | Silent            |             |
| VSCC5 | chr6:106967964-106967964 | G | A | <i>AIM1</i>    | NM_001624:exon2:c.G1657A:p.V553M           | Missense_Mutation |             |
| VSCC5 | chr6:151917674-151917674 | G | A | <i>CCDC170</i> | NM_025059:exon9:c.G1672A:p.E558K           | Missense_Mutation |             |
| VSCC5 | chr6:168377071-168377071 | G | A | <i>HGC6.3</i>  | NM_001129895:exon1:c.C262T:p.P88S          | Missense_Mutation |             |
| VSCC5 | chr7:38431387-38431387   | C | T | <i>AMPH</i>    | NM_139316:exon18:c.G1714A:p.E572K,AMPH     | Missense_Mutation | COSM4966829 |
| VSCC5 | chr7:45113997-45113997   | C | T | <i>CCM2</i>    | NM_001167935:exon7:c.C771T:p.F257F,CCM2    | Silent            | COSM3998915 |

|       |                           |   |   |                 |                                               |                   |             |
|-------|---------------------------|---|---|-----------------|-----------------------------------------------|-------------------|-------------|
| VSCC5 | chr7:73950580-73950580    | G | A | <i>GTF2IRD1</i> | NM_001199207:exon11:c.G1480A:p.V494I,GTF2IRD1 | Missense_Mutation | COSM3458453 |
| VSCC5 | chr7:99693530-99693530    | C | T | <i>MCM7</i>     | NM_001278595:exon10:c.G934A;p.A312T,MCM7      | Missense_Mutation |             |
| VSCC5 | chr7:126173176-126173176  | C | T | <i>GRM8</i>     | NM_000845:exon8:c.G2260A:p.G754R,GRM8         | Missense_Mutation |             |
| VSCC5 | chr8:2855535-2855535      | C | T | <i>CSMD1</i>    | NM_033225:exon54:c.G8375A:p.R2792Q            | Missense_Mutation |             |
| VSCC5 | chr8:8560229-8560229      | C | T | <i>CLDN23</i>   | NM_194284:exon1:c.C321T:p.D107D               | Silent            |             |
| VSCC5 | chr8:22470561-22470561    | C | T | <i>CCAR2</i>    | NM_021174:exon8:c.C616T:p.R206W               | Missense_Mutation |             |
| VSCC5 | chr8:23560114-23560114    | G | A | <i>NKX2-6</i>   | NM_001136271:exon2:c.C756T:p.Y252Y            | Silent            |             |
| VSCC5 | chr8:39845402-39845402    | C | G | <i>IDO2</i>     | NM_194294:exon7:c.C501G:p.T167T               | Silent            |             |
| VSCC5 | chr8:53568857-53568857    | C | A | <i>RB1CC1</i>   | NM_001083617:exon15:c.G3532T:p.E1178X,RB1CC1  | Nonsense_Mutation | COSM1373148 |
| VSCC5 | chr8:53569082-53569082    | C | G | <i>RB1CC1</i>   | NM_001083617:exon15:c.G3307C:p.E1103Q,RB1CC1  | Missense_Mutation | COSM3887488 |
| VSCC5 | chr8:67062646-67062646    | C | T | <i>TRIM55</i>   | NM_033058:exon7:c.C930T:p.F310F,TRIM55        | Silent            | COSM3711780 |
| VSCC5 | chr8:67062658-67062658    | C | A | <i>TRIM55</i>   | NM_033058:exon7:c.C942A:p.L314L,TRIM55        | Silent            |             |
| VSCC5 | chr9:732542-732542        | G | T | <i>KANK1</i>    | NM_153186:exon5:c.G2696T:p.G899V,KANK1        | Missense_Mutation |             |
| VSCC5 | chr9:108118629-108118629  | G | C | <i>SLC44A1</i>  | NM_001286730:exon6:c.G637C:p.E213Q,SLC44A1    | Missense_Mutation |             |
| VSCC5 | chr10:5014878-5014878     | A | G | <i>AKR1C1</i>   | NM_001353:exon7:c.A783G:p.L261L               | Silent            | COSM1380467 |
| VSCC5 | chr10:50109900-50109900   | C | T | <i>WDFY4</i>    | NM_020945:exon47:c.C7578T:p.L2526L            | Silent            |             |
| VSCC5 | chr10:74992845-74992845   | C | T | <i>FAM149B1</i> | NM_173348:exon10:c.C1276T:p.L426F             | Missense_Mutation |             |
| VSCC5 | chr10:108924082-108924082 | G | A | <i>SORCS1</i>   | NM_001013031:exon1:c.C203T:p.T68M,SORCS1      | Missense_Mutation | COSM3890740 |

|       |                           |   |   |                 |                                              |                   |             |
|-------|---------------------------|---|---|-----------------|----------------------------------------------|-------------------|-------------|
| VSCC5 | chr11:7111053-7111053     | G | A | <i>RBMXL2</i>   | NM_014469:exon1:c.G702A:p.S234S              | Silent            |             |
| VSCC5 | chr11:67171761-67171761   | G | A | <i>TBC1D10C</i> | NM_001256508:exon2:c.G88A:p.G30R,TBC1D10C    | Missense_Mutation |             |
| VSCC5 | chr11:72290042-72290042   | G | A | <i>PDE2A</i>    | NM_001143839:exon27:c.C2347T:p.R783X,PDE2A   | Nonsense_Mutation |             |
| VSCC5 | chr11:76255678-76255678   | G | A | <i>EMSY</i>     | NM_001300943:exon19:c.G3088A:p.D1030N,EMSY   | Missense_Mutation |             |
| VSCC5 | chr11:89413787-89413787   | T | G | <i>FOLH1B</i>   | NM_153696:exon8:c.T459G:p.T153T              | Silent            |             |
| VSCC5 | chr11:105623888-105623888 | G | A | <i>GRIA4</i>    | NM_001112812:exon3:c.G429A:p.L143L,GRIA4     | Silent            |             |
| VSCC5 | chr11:108380822-108380822 | G | A | <i>EXPH5</i>    | NM_001144765:exon3:c.C4848T:p.G1616G,EXPH5   | Silent            |             |
| VSCC5 | chr11:113563943-113563943 | G | A | <i>TMPRSS5</i>  | NM_001288749:exon6:c.C475T:p.R159W,TMPRSS5   | Missense_Mutation |             |
| VSCC5 | chr12:2602398-2602398     | C | T | <i>CACNA1C</i>  | NM_000719:exon7:c.C959T:p.T320M,CACNA1C      | Missense_Mutation |             |
| VSCC5 | chr12:6647109-6647109     | T | C | <i>GAPDH</i>    | NM_001256799:exon7:c.T759C:p.F253F,GAPDH     | Silent            |             |
| VSCC5 | chr12:13715915-13715915   | C | T | <i>GRIN2B</i>   | NM_000834:exon13:c.G4257A:p.P1419P           | Silent            |             |
| VSCC5 | chr12:97137829-97137829   | G | A | <i>CFAP54</i>   | NM_001306084:exon55:c.G7589A:p.R2530H        | Missense_Mutation |             |
| VSCC5 | chr12:102406901-102406901 | A | C | <i>CCDC53</i>   | NM_001301107:exon7:c.T567G:p.S189S,CCDC53    | Silent            |             |
| VSCC5 | chr12:133697376-133697376 | C | A | <i>ZNF891</i>   | NM_001277291:exon2:c.G1129T:p.E377X          | Nonsense_Mutation | COSM1179107 |
| VSCC5 | chr13:113176710-113176710 | C | T | <i>TUBGCP3</i>  | NM_001286277:exon14:c.G1639A:p.D547N,TUBGCP3 | Missense_Mutation |             |
| VSCC5 | chr14:64498028-64498028   | G | T | <i>SYNE2</i>    | NM_015180:exon45:c.G7174T:p.E2392X,SYNE2     | Nonsense_Mutation |             |
| VSCC5 | chr15:33066548-33066548   | C | T | <i>FMN1</i>     | NM_001103184:exon17:c.G3554A:p.R1185K,FMN1   | Missense_Mutation |             |
| VSCC5 | chr15:45409786-45409786   | C | T | <i>DUOXA1</i>   | NM_001276265:exon7:c.G1244A:p.R415H,DUOXA1   | Missense_Mutation |             |

|       |                         |   |   |                 |                                               |                   |             |
|-------|-------------------------|---|---|-----------------|-----------------------------------------------|-------------------|-------------|
| VSCC5 | chr15:74630995-74630995 | G | A | <i>CYP11A1</i>  | NM_000781:exon8:c.C1351T:p.R451W,CYP11A1      | Missense_Mutation |             |
| VSCC5 | chr15:91425058-91425058 | G | A | <i>FURIN</i>    | NM_001289823:exon16:c.G2335A:p.E779K,FURIN    | Missense_Mutation |             |
| VSCC5 | chr16:1493880-1493880   | C | T | <i>CCDC154</i>  | NM_001143980:exon2:c.G141A:p.E47E             | Silent            |             |
| VSCC5 | chr16:28855370-28855370 | G | A | <i>TUFM</i>     | NM_003321:exon8:c.C975T:p.L325L               | Silent            |             |
| VSCC5 | chr16:57921969-57921969 | C | T | <i>CNGB1</i>    | NM_001286130:exon32:c.G3234A:p.L1078L,CNGB1   | Silent            |             |
| VSCC5 | chr16:88901652-88901652 | G | A | <i>GALNS</i>    | NM_000512:exon8:c.C867T:p.N289N               | Silent            | COSM1319897 |
| VSCC5 | chr17:7481193-7481193   | C | T | <i>EIF4A1</i>   | NM_001204510:exon9:c.C955T:p.R319C,EIF4A1     | Missense_Mutation |             |
| VSCC5 | chr17:8296433-8296433   | C | T | <i>RNF222</i>   | NM_001146684:exon3:c.G347A:p.W116X            | Nonsense_Mutation |             |
| VSCC5 | chr17:8656701-8656701   | G | A | <i>SPDYE4</i>   | NM_001128076:exon5:c.C592T:p.R198X            | Nonsense_Mutation | COSM4093596 |
| VSCC5 | chr17:38636030-38636030 | C | T | <i>TNS4</i>     | NM_032865:exon10:c.G1806A:p.Q602Q             | Silent            |             |
| VSCC5 | chr17:40646381-40646381 | C | T | <i>ATP6V0A1</i> | NM_001130020:exon12:c.C1225T:p.L409L,ATP6V0A1 | Silent            |             |
| VSCC5 | chr17:58987999-58987999 | G | A | <i>BCAS3</i>    | NM_001099432:exon12:c.G929A:p.R310Q,BCAS3     | Missense_Mutation |             |
| VSCC5 | chr18:61647081-61647081 | C | G | <i>SERPINB8</i> | NM_001031848:exon3:c.C215G:p.S72X,SERPINB8    | Nonsense_Mutation |             |
| VSCC5 | chr19:847936-847936     | G | A | <i>PRTN3</i>    | NM_002777:exon5:c.G738A:p.T246T               | Silent            | COSM1311076 |
| VSCC5 | chr19:2076938-2076938   | C | T | <i>MOB3A</i>    | NM_130807:exon4:c.G496A:p.V166I               | Missense_Mutation |             |
| VSCC5 | chr19:11472056-11472056 | C | T | <i>PLPPR2</i>   | NM_001170635:exon6:c.C480T:p.V160V,PLPPR2     | Silent            | COSM128161  |
| VSCC5 | chr19:17303635-17303635 | G | C | <i>MYO9B</i>    | NM_001130065:exon21:c.G2892C:p.Q964H,MYO9B    | Missense_Mutation |             |
| VSCC5 | chr19:17435976-17435976 | C | T | <i>ANO8</i>     | NM_020959:exon17:c.G2881A:p.E961K             | Missense_Mutation | COSM4162437 |



|       |                          |        |           |                 |                                                       |                   |                          |
|-------|--------------------------|--------|-----------|-----------------|-------------------------------------------------------|-------------------|--------------------------|
| VSCC5 | chr19:17628605-17628605  | A      | G         | <i>PGLS</i>     | NM_012088:exon4:c.A585G:p.A195A                       | Silent            |                          |
| VSCC5 | chr19:41312574-41312574  | G      | A         | <i>EGLN2</i>    | NM_053046:exon3:c.G958A:p.V320I,EGLN2                 | Missense_Mutation | COSM4424392              |
| VSCC5 | chr19:47646856-47646856  | C      | T         | <i>SAE1</i>     | NM_001145713:exon2:c.C204T:p.H68H,SAE1                | Silent            |                          |
| VSCC5 | chr19:52217032-52217032  | G      | A         | <i>HAS1</i>     | NM_001297436:exon5:c.C1382T:p.S461L,HAS1              | Missense_Mutation |                          |
| VSCC5 | chr21:47410331-47410331  | G      | A         | <i>COL6A1</i>   | NM_001848:exon13:c.G997A:p.V333M                      | Missense_Mutation | COSM1317264              |
| VSCC5 | chr22:22277620-22277620  | C      | T         | <i>PPM1F</i>    | NM_014634:exon8:c.G1210A:p.D404N                      | Missense_Mutation |                          |
| VSCC5 | chrX:70384073-70384073   | G      | T         | <i>NLGN3</i>    | NM_001166660:exon4:c.G688T:p.E230X,NLGN3              | Nonsense_Mutation |                          |
| VSCC5 | chrX:104478622-104478622 | G      | A         | <i>ILIRAPL2</i> | NM_017416:exon4:c.G477A:p.E159E                       | Silent            |                          |
| VSCC5 | chrX:134711219-134711219 | G      | T         | <i>DDX26B</i>   | NM_182540:exon14:c.G1875T:p.R625R                     | Silent            |                          |
| VSCC5 | chrX:149840006-149840006 | G      | C         | <i>MTM1</i>     | NM_000252:exon15:c.G1750C:p.D584H                     | Missense_Mutation |                          |
| VSCC5 | chrX:153696799-153696799 | C      | A         | <i>PLXNA3</i>   | NM_017514:exon23:c.C4117A:p.Q1373K                    | Missense_Mutation |                          |
| VSCC5 | chr20:39798798-39798798  | C      | T         | <i>PLCG1</i>    | NM_002660:exon24:c.C2697T:p.I899I,PLCG1               | Silent            | <i>PLCG1</i>             |
| VSCC5 | chr11:95825372-95825374  | TGT    | -         | <i>MAML2</i>    | NM_032427:exon2:c.1821_1823del:p.607_608del           | In_Frame_Del      | <i>MAML2</i> COSM1723032 |
| VSCC5 | chr13:48941638-48941641  | TCTT   | -         | <i>RB1</i>      | NM_000321:exon10:c.948_951del:p.N316fs                | Frame_Shift_Del   | <i>RB1</i>               |
| VSCC5 | chr13:48954332-48954335  | TCTT   | -         | <i>RB1</i>      | NM_000321:exon16:c.1453_1456del:p.S485fs              | Frame_Shift_Del   | <i>RB1</i>               |
| VSCC5 | chr2:217498290-217498290 | -      | GCCGCTGCT | <i>IGFBP2</i>   | NM_000597:exon1:c.44_45insGCCGCTGCT:p.P15delinsPPLL   | In_Frame_Ins      | COSM2153952              |
| VSCC5 | chr4:3076672-3076672     | -      | CCGCCGCCG | <i>HTT</i>      | NM_002111:exon1:c.120_121insCCGCCGCCG:p.P40delinsPPPP | In_Frame_Ins      | COSM5858118              |
| VSCC5 | chr8:494659-494664       | GGCGGC | -         | <i>TDRP</i>     | NM_001256113:exon1:c.94_99del:p.32_33del,TDRP         | In_Frame_Del      |                          |

|       |                          |   |   |                      |                                            |                   |              |
|-------|--------------------------|---|---|----------------------|--------------------------------------------|-------------------|--------------|
| VSCC6 | chr16:89816163-89816163  | G | A | <i>FANCA</i>         | NM_000135:exon32:c.C3214T:p.Q1072X,FANCA   | Nonsense_Mutation | <i>FANCA</i> |
| VSCC6 | chr1:16891365-16891365   | G | T | <i>NBPF1</i>         | UNKNOWN                                    | unknown           |              |
| VSCC6 | chr1:26507327-26507327   | T | C | <i>CNKSR1</i>        | NM_001297647:exon3:c.T332C:p.V111A,CNKSR1  | Missense_Mutation |              |
| VSCC6 | chr1:156513971-156513971 | C | T | <i>IQGAP3</i>        | NM_178229:exon21:c.G2433A:p.L811L          | Silent            |              |
| VSCC6 | chr1:214557442-214557442 | G | A | <i>PTPN14</i>        | NM_005401:exon13:c.C1756T:p.R586C          | Missense_Mutation |              |
| VSCC6 | chr2:15607470-15607470   | G | A | <i>NBAS</i>          | NM_015909:exon19:c.C2080T:p.R694X          | Nonsense_Mutation |              |
| VSCC6 | chr2:27688651-27688651   | G | A | <i>IFT172</i>        | NM_015662:exon17:c.C1791T:p.I597I          | Silent            |              |
| VSCC6 | chr2:98273959-98273959   | T | C | <i>ACTR1B</i>        | NM_005735:exon9:c.A939G:p.R313R            | Silent            |              |
| VSCC6 | chr4:57830670-57830670   | C | T | <i>NOA1</i>          | NM_032313:exon6:c.G1787A:p.R596Q           | Missense_Mutation |              |
| VSCC6 | chr4:75695334-75695334   | C | A | <i>BTC</i>           | NM_001316963:exon2:c.G97T:p.G33W,BTC       | Missense_Mutation |              |
| VSCC6 | chr5:23527083-23527083   | G | C | <i>PRDM9</i>         | NM_001310214:exon11:c.G1886C:p.R629T,PRDM9 | Missense_Mutation |              |
| VSCC6 | chr5:168138011-168138011 | C | G | <i>SLIT3</i>         | NM_001271946:exon25:c.G2608C:p.E870Q,SLIT3 | Missense_Mutation |              |
| VSCC6 | chr6:27834714-27834714   | C | T | <i>HIST1H1B</i>      | NM_005322:exon1:c.G594A:p.P198P            | Silent            |              |
| VSCC6 | chr6:136512925-136512925 | G | A | <i>PDE7B</i>         | NM_018945:exon13:c.G1300A:p.D434N          | Missense_Mutation |              |
| VSCC6 | chr7:75028240-75028240   | T | C | <i>TRIM73,TRIM74</i> | NM_198853:exon2:c.T23C:p.L8P,TRIM73        | Missense_Mutation |              |
| VSCC6 | chr7:100247678-100247678 | C | G | <i>ACTL6B</i>        | NM_016188:exon5:c.G450C:p.K150N            | Missense_Mutation |              |
| VSCC6 | chr7:111980949-111980949 | G | A | <i>ZNF277</i>        | NM_021994:exon11:c.G1032A:p.V344V          | Silent            | COSM5744525  |
| VSCC6 | chr8:77763739-77763739   | A | G | <i>ZFHX4</i>         | NM_024721:exon10:c.A4582G:p.N1528D         | Missense_Mutation |              |
| VSCC6 | chr9:120476624-120476624 | C | A | <i>TLR4</i>          | NM_138557:exon2:c.C1618A:p.H540N,TLR4      | Missense_Mutation |              |

|       |                           |   |   |                 |                                            |                   |             |
|-------|---------------------------|---|---|-----------------|--------------------------------------------|-------------------|-------------|
| VSCC6 | chr11:67432799-67432799   | G | A | <i>ALDH3B2</i>  | NM_000695:exon7:c.C663T:p.R221R,ALDH3B2    | Silent            |             |
| VSCC6 | chr12:120546236-120546236 | C | G | <i>RAB35</i>    | NM_001167606:exon2:c.G88C:p.D30H,RAB35     | Missense_Mutation |             |
| VSCC6 | chr13:114766376-114766376 | C | T | <i>RASA3</i>    | NM_007368:exon19:c.G1775A:p.R592H          | Missense_Mutation |             |
| VSCC6 | chr14:62541883-62541883   | C | T | <i>SYT16</i>    | NM_031914:exon3:c.C767T:p.S256F            | Missense_Mutation | COSM4878954 |
| VSCC6 | chr15:62208024-62208024   | G | A | <i>VPS13C</i>   | NM_017684:exon59:c.C8124T:p.V2708V,VPS13C  | Silent            |             |
| VSCC6 | chr16:19566892-19566892   | C | T | <i>C16orf62</i> | NM_001300743:exon1:c.C108T:p.C36C,C16orf62 | Silent            | COSM1692452 |
| VSCC6 | chr17:40986241-40986241   | G | T | <i>PSME3</i>    | NM_001267045:exon3:c.G43T:p.G15W           | Missense_Mutation |             |
| VSCC6 | chr17:76212078-76212078   | A | C | <i>BIRC5</i>    | NM_001012271:exon3:c.A253C:p.T85P          | Missense_Mutation |             |
| VSCC6 | chr17:76795096-76795096   | C | A | <i>USP36</i>    | NM_025090:exon19:c.G3134T:p.W1045L         | Missense_Mutation |             |
| VSCC6 | chr19:1299887-1299887     | C | A | <i>EFNA2</i>    | NM_001405:exon4:c.C585A:p.G195G            | Silent            |             |
| VSCC6 | chr19:15795890-15795890   | C | T | <i>CYP4F12</i>  | NM_023944:exon9:c.C998T:p.T333M            | Missense_Mutation | COSM1070354 |
| VSCC6 | chr20:50407142-50407142   | G | A | <i>SALL4</i>    | NM_020436:exon2:c.C1880T:p.S627L           | Missense_Mutation |             |
| VSCC6 | chr21:30959763-30959763   | G | T | <i>GRIK1</i>    | NM_175611:exon11:c.C1671A:p.N557K,GRIK1    | Missense_Mutation |             |
| VSCC6 | chrX:3019148-3019148      | G | A | <i>ARSF</i>     | NM_001201538:exon8:c.G988A:p.D330N,ARSF    | Missense_Mutation |             |
| VSCC6 | chrX:48687678-48687678    | G | C | <i>ERAS</i>     | NM_181532:exon2:c.G145C:p.A49P             | Missense_Mutation |             |
| VSCC6 | chrX:50129536-50129536    | C | T | <i>DGKK</i>     | UNKNOWN                                    | unknown           | COSM3613257 |
| VSCC6 | chrX:99661760-99661760    | G | A | <i>PCDH19</i>   | NM_001105243:exon1:c.C1836T:p.R612R,PCDH19 | Silent            |             |
| VSCC6 | chrX:114424147-114424147  | C | G | <i>RBMXL3</i>   | NM_001145346:exon1:c.C143G:p.S48W          | Missense_Mutation | COSM742214  |
| VSCC6 | chrX:153581770-153581770  | G | A | <i>FLNA</i>     | NM_001456:exon36:c.C5892T:p.P1964P,FLNA    | Silent            |             |

|       |                          |           |   |                 |                                                      |                   |              |
|-------|--------------------------|-----------|---|-----------------|------------------------------------------------------|-------------------|--------------|
| VSCC6 | chr3:189584556-189584556 | G         | A | <i>TP63</i>     | NM_001114980:exon4:c.G570A:p.Q190Q,TP63              | Silent            | <i>TP63</i>  |
| VSCC6 | chr11:95825375-95825383  | TGCTGCTGC | - | <i>MAML2</i>    | NM_032427:exon2:c.1812_1820del;p.604_607del          | In_Frame_Deletion | <i>MAML2</i> |
| VSCC6 | chr19:41173893-41173898  | TGCTGT    | - | <i>NUMBL</i>    | NM_001289979:exon9:c.1182_1187del;p.394_396del,NUMBL | In_Frame_Deletion |              |
| VSCC1 | chr1:33059265-33059265   | G         | A | <i>ZBTB8A</i>   | NM_001040441:exon3:c.G733A:p.E245K,ZBTB8A            | Missense_Mutation |              |
| VSCC1 | chr1:38164634-38164634   | C         | T | <i>CDCA8</i>    | NM_001256875:exon4:c.C322T:p.L108L,CDCA8             | Silent            |              |
| VSCC1 | chr1:85595759-85595759   | G         | T | <i>WDR63</i>    | NM_001288563:exon21:c.G2379T;p.K793N,WDR63           | Missense_Mutation |              |
| VSCC1 | chr1:111215851-111215851 | C         | T | <i>KCNA3</i>    | NM_002232:exon1:c.G1581A:p.S527S                     | Silent            |              |
| VSCC1 | chr1:154321499-154321499 | C         | A | <i>ATP8B2</i>   | NM_020452:exon28:c.C3577A:p.R1193S                   | Missense_Mutation |              |
| VSCC1 | chr1:180805823-180805823 | C         | T | <i>XPR1</i>     | NM_004736:exon11:c.C1472T:p.T491M                    | Missense_Mutation |              |
| VSCC1 | chr1:183077434-183077434 | C         | T | <i>LAMC1</i>    | NM_002293:exon3:c.C747T:p.I249I                      | Silent            |              |
| VSCC1 | chr1:203316681-203316681 | C         | G | <i>FMOD</i>     | NM_002023:exon2:c.G718C:p.D240H                      | Missense_Mutation |              |
| VSCC1 | chr1:214551358-214551358 | C         | G | <i>PTPN14</i>   | NM_005401:exon14:c.G2632C:p.V878L                    | Missense_Mutation |              |
| VSCC1 | chr1:247267460-247267460 | C         | G | <i>ZNF669</i>   | NM_024804:exon1:c.G42C:p.E14D                        | Missense_Mutation |              |
| VSCC1 | chr1:247587841-247587841 | C         | T | <i>NLRP3</i>    | NM_001127462:exon3:c.C1096T;p.R366W,NLRP3            | Missense_Mutation |              |
| VSCC1 | chr2:29240781-29240781   | C         | A | <i>FAM179A</i>  | NM_199280:exon10:c.C1319A:p.P440H                    | Missense_Mutation | COSM918142   |
| VSCC1 | chr2:119915758-119915758 | G         | A | <i>CIQL2</i>    | NM_182528:exon1:c.C88T:p.R30C                        | Missense_Mutation | COSM1736986  |
| VSCC1 | chr2:153001436-153001436 | C         | T | <i>STAM2</i>    | NM_005843:exon6:c.G483A:p.S161S                      | Silent            | COSM465649   |
| VSCC1 | chr2:172725276-172725276 | G         | A | <i>SLC25A12</i> | NM_003705:exon3:c.C124T:p.R42C                       | Missense_Mutation |              |

|       |                          |   |   |                 |                                             |                   |             |
|-------|--------------------------|---|---|-----------------|---------------------------------------------|-------------------|-------------|
| VSCC1 | chr2:182322937-182322937 | C | T | <i>ITGA4</i>    | NM_000885:exon2:c.C212T:p.A71V,ITGA4        | Missense_Mutation |             |
| VSCC1 | chr2:219494309-219494309 | G | A | <i>PLCD4</i>    | NM_032726:exon8:c.G1042A:p.V348I            | Missense_Mutation |             |
| VSCC1 | chr3:9881966-9881966     | C | T | <i>RPUSD3</i>   | NM_001142547:exon6:c.G581A:p.R194Q,RPUSD3   | Missense_Mutation |             |
| VSCC1 | chr3:19551880-19551880   | C | T | <i>KCNH8</i>    | NM_144633:exon12:c.C2066T:p.S689F           | Missense_Mutation | COSM4838168 |
| VSCC1 | chr3:19551889-19551889   | C | G | <i>KCNH8</i>    | NM_144633:exon12:c.C2075G:p.S692X           | Nonsense_Mutation |             |
| VSCC1 | chr3:50363558-50363558   | C | A | <i>TUSC2</i>    | NM_007275:exon3:c.G327T:p.E109D             | Missense_Mutation |             |
| VSCC1 | chr4:124323454-124323454 | C | T | <i>SPRY1</i>    | NM_001258039:exon2:c.C708T:p.D236D,SPRY1    | Silent            | COSM3869395 |
| VSCC1 | chr5:7757687-7757687     | C | T | <i>ADCY2</i>    | NM_020546:exon16:c.C2082T:p.A694A           | Silent            |             |
| VSCC1 | chr5:7875421-7875421     | G | C | <i>MTRR</i>     | NM_002454:exon4:c.G334C:p.D112H,MTRR        | Missense_Mutation |             |
| VSCC1 | chr5:9224863-9224863     | C | T | <i>SEMA5A</i>   | NM_003966:exon8:c.G569A:p.R190H             | Missense_Mutation | COSM2019380 |
| VSCC1 | chr5:10649531-10649531   | C | T | <i>ANKRD33B</i> | NM_001164440:exon4:c.C791T:p.P264L          | Missense_Mutation |             |
| VSCC1 | chr5:126746147-126746147 | C | T | <i>MEGF10</i>   | NM_001256545:exon9:c.C984T:p.N328N,MEGF10   | Silent            |             |
| VSCC1 | chr5:156899411-156899411 | G | A | <i>NIPAL4</i>   | NM_001172292:exon5:c.G787A:p.G263R,NIPAL4   | Missense_Mutation |             |
| VSCC1 | chr5:179529123-179529123 | C | T | <i>RASGEF1C</i> | NM_175062:exon13:c.G1324A:p.E442K           | Missense_Mutation | COSM3753362 |
| VSCC1 | chr6:35755727-35755727   | C | G | <i>CLPSL1</i>   | NM_001010886:exon3:c.C306G:p.I102M          | Missense_Mutation | COSM1365466 |
| VSCC1 | chr6:57012061-57012061   | C | T | <i>ZNF451</i>   | NM_001031623:exon10:c.C1178T:p.S393L,ZNF451 | Missense_Mutation |             |
| VSCC1 | chr6:57012358-57012358   | C | T | <i>ZNF451</i>   | NM_001031623:exon10:c.C1475T:p.S492L,ZNF451 | Missense_Mutation |             |
| VSCC1 | chr6:57012604-57012604   | C | T | <i>ZNF451</i>   | NM_001031623:exon10:c.C1721T:p.S574F,ZNF451 | Missense_Mutation |             |

|       |                           |   |   |                   |                                             |                   |             |
|-------|---------------------------|---|---|-------------------|---------------------------------------------|-------------------|-------------|
| VSCC1 | chr6:57013079-57013079    | C | T | <i>ZNF451</i>     | NM_001031623:exon10:c.C2196T:p.V732V,ZNF451 | Silent            |             |
| VSCC1 | chr7:1588278-1588278      | C | T | <i>TMEM184A</i>   | NM_001097620:exon7:c.G691A:p.V231I          | Missense_Mutation |             |
| VSCC1 | chr7:94539575-94539575    | C | T | <i>PPP1R9A</i>    | NM_001166161:exon1:c.C150T:p.G50G,PPP1R9A   | Silent            |             |
| VSCC1 | chr7:103137192-103137192  | C | G | <i>RELN</i>       | NM_005045:exon56:c.G8974C:p.E2992Q,RELN     | Missense_Mutation |             |
| VSCC1 | chr7:146997233-146997233  | G | T | <i>CNTNAP2</i>    | NM_014141:exon9:c.G1349T:p.G450V            | Missense_Mutation |             |
| VSCC1 | chr8:1624776-1624776      | T | A | <i>DLGAP2</i>     | NM_001277161:exon7:c.T1998A:p.D666E,DLGAP2  | Missense_Mutation |             |
| VSCC1 | chr8:3019690-3019690      | G | A | <i>CSMD1</i>      | NM_033225:exon38:c.C5835T:p.Y1945Y          | Silent            |             |
| VSCC1 | chr8:21851918-21851918    | C | T | <i>XPO7</i>       | NM_015024:exon20:c.C2193T:p.F731F           | Silent            |             |
| VSCC1 | chr8:27516511-27516511    | C | T | <i>SCARA3</i>     | NM_016240:exon5:c.C824T:p.A275V,SCARA3      | Missense_Mutation |             |
| VSCC1 | chr8:141461059-141461059  | G | A | <i>TRAPPC9</i>    | NM_001160372:exon2:c.C414T:p.Y138Y,TRAPPC9  | Silent            |             |
| VSCC1 | chr9:6602195-6602195      | C | A | <i>GLDC</i>       | NM_000170:exon8:c.G1069T:p.G357W            | Missense_Mutation |             |
| VSCC1 | chr10:35928339-35928339   | C | T | <i>FZD8</i>       | NM_031866:exon1:c.G2019A:p.L673L            | Silent            |             |
| VSCC1 | chr10:43659338-43659338   | C | T | <i>CSGALNACT2</i> | NM_018590:exon5:c.C1005T:p.T335T            | Silent            |             |
| VSCC1 | chr10:43659339-43659339   | T | G | <i>CSGALNACT2</i> | NM_018590:exon5:c.T1006G:p.L336V            | Missense_Mutation |             |
| VSCC1 | chr10:43659419-43659419   | G | T | <i>CSGALNACT2</i> | NM_018590:exon5:c.G1086T:p.L362F            | Missense_Mutation | COSM5516797 |
| VSCC1 | chr10:99198447-99198447   | G | A | <i>EXOSC1</i>     | NM_016046:exon5:c.C325T:p.R109X             | Nonsense_Mutation |             |
| VSCC1 | chr10:108923740-108923740 | C | A | <i>SORCS1</i>     | NM_001013031:exon1:c.G545T:p.G182V,SORCS1   | Missense_Mutation |             |
| VSCC1 | chr10:112838830-112838830 | C | T | <i>ADRA2A</i>     | NM_000681:exon1:c.C1076T:p.T359M            | Missense_Mutation |             |

|       |                           |   |   |                |                                            |                   |             |
|-------|---------------------------|---|---|----------------|--------------------------------------------|-------------------|-------------|
| VSCC1 | chr11:557005-557005       | G | A | <i>LMNTD2</i>  | NM_173573:exon8:c.C806T:p.S269F            | Missense_Mutation |             |
| VSCC1 | chr11:6261670-6261670     | C | T | <i>CNGA4</i>   | NM_001037329:exon4:c.C646T:p.R216C         | Missense_Mutation | COSM5004917 |
| VSCC1 | chr11:10515089-10515089   | C | T | <i>AMPD3</i>   | NM_001172431:exon6:c.C656T:p.A219V,AMPD3   | Missense_Mutation |             |
| VSCC1 | chr11:48267016-48267016   | C | G | <i>OR4X2</i>   | NM_001004727:exon1:c.C361G:p.P121A         | Missense_Mutation | COSM5622836 |
| VSCC1 | chr11:55541538-55541538   | G | A | <i>OR5D13</i>  | NM_001001967:exon1:c.G625A:p.E209K         | Missense_Mutation |             |
| VSCC1 | chr11:65387075-65387075   | C | G | <i>PCNXL3</i>  | NM_032223:exon7:c.C1773G:p.R591R           | Silent            |             |
| VSCC1 | chr11:67814997-67814997   | C | T | <i>TCIRG1</i>  | NM_006053:exon6:c.C615T:p.V205V,TCIRG1     | Silent            |             |
| VSCC1 | chr11:77921340-77921340   | C | T | <i>USP35</i>   | NM_020798:exon10:c.C2439T:p.F813F          | Silent            |             |
| VSCC1 | chr12:3747527-3747527     | G | T | <i>CRACR2A</i> | NM_001144958:exon14:c.C1365A:p.T455T       | Silent            |             |
| VSCC1 | chr12:47471286-47471286   | C | T | <i>AMIGO2</i>  | NM_181847:exon2:c.G1500A:p.T500T,AMIGO2    | Silent            |             |
| VSCC1 | chr12:48596732-48596732   | A | C | <i>OR10AD1</i> | NM_001004134:exon1:c.T344G:p.L115R         | Missense_Mutation |             |
| VSCC1 | chr12:53069243-53069243   | T | C | <i>KRT1</i>    | NM_006121:exon9:c.A1669G:p.S557G           | Missense_Mutation |             |
| VSCC1 | chr13:111290675-111290675 | G | A | <i>CARKD</i>   | NM_018210:exon10:c.G980A:p.R327Q           | Missense_Mutation |             |
| VSCC1 | chr15:40099275-40099275   | G | A | <i>GPR176</i>  | NM_001271855:exon2:c.C222T:p.V74V,GPR176   | Silent            |             |
| VSCC1 | chr15:41829178-41829178   | G | A | <i>RPAP1</i>   | NM_015540:exon2:c.C146T:p.P49L             | Missense_Mutation | COSM5877950 |
| VSCC1 | chr15:65677297-65677297   | T | C | <i>IGDCC4</i>  | NM_020962:exon19:c.A3337G:p.I1113V         | Missense_Mutation |             |
| VSCC1 | chr15:89848450-89848450   | G | A | <i>FANCI</i>   | NM_018193:exon28:c.G2983A:p.G995R,FANCI    | Missense_Mutation |             |
| VSCC1 | chr16:3433585-3433585     | C | G | <i>ZSCAN32</i> | NM_001284529:exon3:c.G494C:p.G165A,ZSCAN32 | Missense_Mutation |             |

|       |                         |   |   |                 |                                              |                   |             |
|-------|-------------------------|---|---|-----------------|----------------------------------------------|-------------------|-------------|
| VSCC1 | chr16:12618697-12618697 | G | A | <i>SNX29</i>    | NM_032167:exon20:c.G2317A:p.V773I            | Missense_Mutation |             |
| VSCC1 | chr16:22086889-22086889 | C | T | <i>Cl6orf52</i> | NM_001164579:exon2:c.C188T:p.P63L            | Missense_Mutation |             |
| VSCC1 | chr16:23360006-23360006 | A | G | <i>SCNN1B</i>   | NM_000336:exon2:c.A86G:p.Y29C                | Missense_Mutation |             |
| VSCC1 | chr16:88677776-88677776 | G | A | <i>ZC3H18</i>   | NM_144604:exon8:c.G1307A:p.R436Q,ZC3H18      | Missense_Mutation | COSM1251069 |
| VSCC1 | chr17:4448100-4448100   | G | A | <i>MYBBP1A</i>  | NM_001105538:exon18:c.C2427T;p.D809D,MYBBP1A | Silent            |             |
| VSCC1 | chr17:34945732-34945732 | G | C | <i>GGNBP2</i>   | NM_024835:exon14:c.G1985C:p.R662T            | Missense_Mutation |             |
| VSCC1 | chr17:48435725-48435725 | C | G | <i>XYLT2</i>    | NM_022167:exon10:c.C2099G:p.S700C            | Missense_Mutation |             |
| VSCC1 | chr17:48655674-48655674 | G | A | <i>CACNA1G</i>  | NM_001256324:exon9:c.G2050A:p.E684K,CACNA1G  | Missense_Mutation | COSM4679073 |
| VSCC1 | chr17:74068502-74068502 | C | T | <i>SRP68</i>    | NM_001260502:exon1:c.G71A:p.G24D,SRP68       | Missense_Mutation |             |
| VSCC1 | chr17:80789038-80789038 | G | T | <i>ZNF750</i>   | NM_024702:exon2:c.C1293A:p.Y431X             | Nonsense_Mutation | COSM3749073 |
| VSCC1 | chr18:40503543-40503543 | G | A | <i>RIT2</i>     | NM_001272077:exon4:c.C420T:p.F140F,RIT2      | Silent            | COSM4780267 |
| VSCC1 | chr18:77246562-77246562 | G | A | <i>NFATC1</i>   | NM_001278673:exon8:c.G991A:p.V331M,NFATC1    | Missense_Mutation |             |
| VSCC1 | chr19:1012480-1012480   | C | T | <i>TMEM259</i>  | NM_001033026:exon4:c.G700A:p.V234I,TMEM259   | Missense_Mutation |             |
| VSCC1 | chr19:7506600-7506600   | G | A | <i>ARHGEF18</i> | NM_001130955:exon2:c.G604A:p.D202N,ARHGEF18  | Missense_Mutation |             |
| VSCC1 | chr19:30165137-30165137 | C | T | <i>PLEKHF1</i>  | NM_024310:exon2:c.C391T;p.R131W              | Missense_Mutation |             |
| VSCC1 | chr19:36134185-36134185 | C | G | <i>ETV2</i>     | NM_014209:exon5:c.C245G:p.S82C               | Missense_Mutation |             |
| VSCC1 | chr19:36134257-36134257 | C | T | <i>ETV2</i>     | NM_001300974:exon4:c.C38T:p.S13L,ETV2        | Missense_Mutation | COSM3773425 |
| VSCC1 | chr19:45477752-45477752 | G | A | <i>CLPTM1</i>   | NM_001282175:exon4:c.G324A:p.S108S,CLPTM1    | Silent            | COSM3773426 |



|       |                          |   |   |                              |                                                |                   |               |
|-------|--------------------------|---|---|------------------------------|------------------------------------------------|-------------------|---------------|
| VSCC1 | chr19:48946118-48946118  | G | A | <i>GRIN2D</i>                | NM_000836:exon13:c.G2935A:p.E979K              | Missense_Mutation |               |
| VSCC1 | chr19:49377944-49377944  | G | A | <i>PPP1R15A</i>              | NM_014330:exon2:c.G1454A:p.R485Q               | Missense_Mutation | COSM5650943   |
| VSCC1 | chr19:52002463-52002463  | G | A | <i>SIGLEC12</i>              | NM_033329:exon3:c.C742T:p.Q248X,SIGLEC12       | Nonsense_Mutation |               |
| VSCC1 | chr20:62038187-62038187  | G | C | <i>KCNQ2</i>                 | NM_004518:exon15:c.C2345G:p.S782C,KCNQ2        | Missense_Mutation |               |
| VSCC1 | chr21:45194575-45194575  | C | T | <i>CSTB</i>                  | NM_000100:exon2:c.G132A:p.K44K                 | Silent            |               |
| VSCC1 | chr22:29140645-29140645  | G | A | <i>HSCB</i>                  | NM_172002:exon3:c.G376A:p.D126N                | Missense_Mutation |               |
| VSCC1 | chr22:43735224-43735224  | C | T | <i>SCUBE1</i>                | NM_173050:exon2:c.G106A:p.E36K                 | Missense_Mutation |               |
| VSCC1 | chrX:2761106-2761106     | A | G | <i>GYG2</i>                  | NM_001184703:exon3:c.A75G:p.S25S,GYG2          | Silent            |               |
| VSCC1 | chrX:26212273-26212273   | C | G | <i>MAGEB6</i>                | NM_173523:exon2:c.C310G:p.Q104E                | Missense_Mutation | COSM3580847   |
| VSCC1 | chrX:35959407-35959407   | C | A | <i>CFAP47</i>                | NM_001304548:exon3:c.C409A:p.P137T,CFAP47      | Missense_Mutation |               |
| VSCC1 | chrX:41495914-41495914   | C | G | <i>CASK</i>                  | NM_001126054:exon9:c.G832C:p.E278Q,CASK        | Missense_Mutation |               |
| VSCC1 | chrX:43603358-43603358   | C | G | <i>MAOA</i>                  | NM_000240:exon14:c.C1377G:p.V459V,MAOA         | Silent            | COSM4167951   |
| VSCC1 | chrX:48792014-48792014   | G | A | <i>OTUD5</i>                 | NM_001136157:exon4:c.C880T:p.R294C,OTUD5       | Missense_Mutation | COSM5959443   |
| VSCC1 | chrX:50345672-50345672   | T | G | <i>SHROOM4</i>               | NM_020717:exon7:c.A3903C:p.L1301L              | Silent            |               |
| VSCC1 | chrX:102192441-102192441 | G | A | <i>RAB40AL</i>               | NM_001031834:exon1:c.G195A:p.L65L              | Silent            |               |
| VSCC1 | chrX:106359972-106359972 | A | G | <i>RBM41</i>                 | NM_001171080:exon2:c.T33C:p.D11D,RBM41         | Silent            | COSM230483    |
| VSCC1 | chrX:151283665-151283665 | C | G | <i>MAGEA10-MAGEA5,MAGEA5</i> | NM_021049:exon3:c.G348C:p.L116F,MAGEA10-MAGEA5 | Missense_Mutation | COSM1215012   |
| VSCC1 | chr3:178936091-178936091 | G | A | <i>PIK3CA</i>                | NM_006218:exon10:c.G1633A:p.E545K              | Missense_Mutation | <i>PIK3CA</i> |

|       |                          |       |   |               |                                                |                   |               |
|-------|--------------------------|-------|---|---------------|------------------------------------------------|-------------------|---------------|
| VSCC1 | chr8:103850981-103850985 | GGGTG | - | <i>AZIN1</i>  | NM_001301668:exon5:c.436_440del:p.H146fs,AZIN1 | Frame_Shift_Del   |               |
| VSCC7 | chrX:129162622-129162622 | G     | A | <i>BCORL1</i> | NM_001184772:exon7:c.G4091A:p.R1364H,BCORL1    | Missense_Mutation | <i>BCORL1</i> |
| VSCC7 | chr2:202139642-202139642 | C     | T | <i>CASP8</i>  | NM_033356:exon5:c.C581T:p.S194L,CASP8          | Missense_Mutation | <i>CASP8</i>  |
| VSCC7 | chr12:6709750-6709750    | C     | T | <i>CHD4</i>   | NM_001297553:exon7:c.G992A:p.R331H,CHD4        | Missense_Mutation | <i>CHD4</i>   |
| VSCC7 | chr11:57428433-57428433  | G     | A | <i>CLP1</i>   | NM_001142597:exon3:c.G611A:p.R204Q,CLP1        | Missense_Mutation | <i>CLP1</i>   |
| VSCC7 | chr7:55233037-55233037   | C     | T | <i>EGFR</i>   | NM_005228:exon15:c.C1787T:p.P596L,EGFR         | Missense_Mutation | <i>EGFR</i>   |
| VSCC7 | chr12:1221410-1221410    | G     | A | <i>ERC1</i>   | NM_001301248:exon5:c.G1347A:p.S449S,ERC1       | Silent            | <i>ERC1</i>   |
| VSCC7 | chr10:76789215-76789215  | G     | A | <i>KAT6B</i>  | NM_001256468:exon18:c.G4084A:p.V1362I,KAT6B    | Missense_Mutation | <i>KAT6B</i>  |
| VSCC7 | chr1:10177614-10177614   | G     | A | <i>UBE4B</i>  | NM_006048:exon7:c.G907A:p.E303K,UBE4B          | Missense_Mutation |               |
| VSCC7 | chr1:15701095-15701095   | G     | A | <i>FHAD1</i>  | NM_052929:exon26:c.G3479A:p.R1160Q             | Missense_Mutation |               |
| VSCC7 | chr1:36384759-36384759   | G     | A | <i>AGO1</i>   | NM_001317123:exon18:c.G2144A:p.R715Q,AGO1      | Missense_Mutation |               |
| VSCC7 | chr1:36553134-36553134   | G     | A | <i>TEKT2</i>  | NM_014466:exon8:c.G950A:p.R317Q                | Missense_Mutation |               |
| VSCC7 | chr1:36824428-36824428   | G     | A | <i>STK40</i>  | NM_001282546:exon3:c.C123T:p.A41A              | Silent            |               |
| VSCC7 | chr1:40928562-40928562   | C     | T | <i>ZFP69B</i> | NM_023070:exon5:c.C906T:p.T302T                | Silent            | COSM5481724   |
| VSCC7 | chr1:62941819-62941819   | G     | A | <i>DOCK7</i>  | NM_001272001:exon43:c.C5517T:p.Y1839Y,DOCK7    | Silent            | COSM3070625   |
| VSCC7 | chr1:65157216-65157216   | C     | T | <i>CACHD1</i> | NM_001293274:exon26:c.C2909T:p.T970M,CACHD1    | Missense_Mutation |               |
| VSCC7 | chr1:87045902-87045902   | A     | T | <i>CLCA4</i>  | NM_012128:exon14:c.A2634T:p.T878T              | Silent            |               |
| VSCC7 | chr1:90401106-90401106   | G     | A | <i>LRRC8D</i> | NM_001134479:exon3:c.G2479A:p.G827R,LRRC8D     | Missense_Mutation |               |

|       |                          |   |   |                 |                                                |                       |             |
|-------|--------------------------|---|---|-----------------|------------------------------------------------|-----------------------|-------------|
| VSCC7 | chr1:93309080-93309080   | G | A | <i>FAM69A</i>   | NM_001252269:exon4:c.C1012T<br>:p.R338C,FAM69A | Missense_M<br>utation | COSM1037308 |
| VSCC7 | chr1:109479977-109479977 | C | T | <i>CLCC1</i>    | NM_001278203:exon5:c.G550A:<br>p.E184K,CLCC1   | Missense_M<br>utation |             |
| VSCC7 | chr1:114201723-114201723 | G | A | <i>MAGI3</i>    | NM_001142782:exon16:c.G2651<br>A:p.R884Q,MAGI3 | Missense_M<br>utation |             |
| VSCC7 | chr1:116226688-116226688 | G | A | <i>VANGL1</i>   | NM_001172411:exon6:c.G1064A<br>:p.R355Q,VANGL1 | Missense_M<br>utation |             |
| VSCC7 | chr1:145112467-145112467 | G | A | <i>SEC22B</i>   | UNKNOWN                                        | unknown               |             |
| VSCC7 | chr1:150199042-150199042 | C | A | <i>ANP32E</i>   | NM_001136478:exon4:c.G456T:<br>p.E152D,ANP32E  | Missense_M<br>utation | COSM3590381 |
| VSCC7 | chr1:150199045-150199045 | T | C | <i>ANP32E</i>   | NM_001280560:exon4:c.A410G:<br>p.K137R         | Missense_M<br>utation |             |
| VSCC7 | chr1:153909163-153909163 | C | T | <i>DENND4B</i>  | NM_014856:exon16:c.G2294A:p.<br>R765Q          | Missense_M<br>utation |             |
| VSCC7 | chr1:211533366-211533366 | G | A | <i>TRAF5</i>    | NM_001033910:exon5:c.G491A:<br>p.R164Q,TRAF5   | Missense_M<br>utation |             |
| VSCC7 | chr1:220276828-220276828 | C | T | <i>IARS2</i>    | NM_018060:exon8:c.C990T:p.Y<br>330Y            | Silent                |             |
| VSCC7 | chr1:228461152-228461152 | C | T | <i>OBSCN</i>    | NM_001271223:exon21:c.C6166<br>T:p.R2056W      | Missense_M<br>utation |             |
| VSCC7 | chr1:231132904-231132904 | C | T | <i>ARV1</i>     | NM_022786:exon5:c.C711T:p.A<br>237A            | Silent                | COSM118399  |
| VSCC7 | chr1:231337152-231337152 | G | A | <i>TRIM67</i>   | NM_001004342:exon5:c.G1423A<br>:p.V475I,TRIM67 | Missense_M<br>utation | COSM3602739 |
| VSCC7 | chr1:247587279-247587279 | G | A | <i>NLRP3</i>    | NM_001127462:exon3:c.G534A:<br>p.R178R,NLRP3   | Silent                |             |
| VSCC7 | chr2:3425688-3425688     | G | A | <i>TRAPPC12</i> | NM_016030:exon4:c.G1201A:p.<br>G401R           | Missense_M<br>utation | COSM4947918 |
| VSCC7 | chr2:28849349-28849349   | G | A | <i>PLB1</i>     | NM_001170585:exon50:c.G3601<br>A:p.D1201N,PLB1 | Missense_M<br>utation | COSM4884634 |
| VSCC7 | chr2:54080671-54080671   | C | T | <i>GPR75</i>    | NM_006794:exon2:c.G1223A:p.<br>R408Q           | Missense_M<br>utation |             |
| VSCC7 | chr2:54894781-54894781   | G | A | <i>SPTBN1</i>   | NM_003128:exon35:c.G6874A:p.<br>D2292N         | Missense_M<br>utation |             |
| VSCC7 | chr2:71576623-71576623   | G | A | <i>ZNF638</i>   | NM_001014972:exon2:c.G539A:<br>p.R180Q,ZNF638  | Missense_M<br>utation |             |

|       |                          |   |   |                  |                                             |                   |             |
|-------|--------------------------|---|---|------------------|---------------------------------------------|-------------------|-------------|
| VSCC7 | chr2:73315688-73315688   | C | T | <i>RAB11FIP5</i> | NM_015470:exon3:c.G1058A:p.R353Q            | Missense_Mutation | COSM403423  |
| VSCC7 | chr2:86325845-86325845   | G | A | <i>POLR1A</i>    | NM_015425:exon3:c.C321T:p.C107C             | Silent            |             |
| VSCC7 | chr2:88407930-88407930   | G | A | <i>SMYD1</i>     | NM_198274:exon9:c.G1186A:p.V396M            | Missense_Mutation | COSM1060902 |
| VSCC7 | chr2:103299826-103299826 | G | A | <i>SLC9A2</i>    | NM_003048:exon4:c.G1111A:p.E371K            | Missense_Mutation |             |
| VSCC7 | chr2:103335600-103335600 | C | T | <i>MFSD9</i>     | NM_032718:exon6:c.G704A:p.R235Q             | Missense_Mutation |             |
| VSCC7 | chr2:111881387-111881387 | C | T | <i>BCL2L11</i>   | NM_001204106:exon2:c.C65T:p.A22V,BCL2L11    | Missense_Mutation |             |
| VSCC7 | chr2:128610570-128610570 | G | A | <i>POLR2D</i>    | NM_004805:exon2:c.C183T:p.F61F              | Silent            |             |
| VSCC7 | chr2:148731078-148731078 | G | A | <i>ORC4</i>      | NM_002552:exon3:c.C73T:p.R25C,ORC4          | Missense_Mutation |             |
| VSCC7 | chr2:210704110-210704110 | G | A | <i>UNC80</i>     | NM_032504:exon19:c.G3206A:p.R1069Q,UNC80    | Missense_Mutation |             |
| VSCC7 | chr2:215855516-215855516 | G | A | <i>ABCA12</i>    | NM_015657:exon16:c.C2580T:p.I860I,ABCA12    | Silent            |             |
| VSCC7 | chr2:219508238-219508238 | G | A | <i>ZNF142</i>    | NM_001105537:exon8:c.C3001T;p.L1001F        | Missense_Mutation |             |
| VSCC7 | chr2:219508240-219508240 | T | C | <i>ZNF142</i>    | NM_001105537:exon8:c.A2999G;p.H1000R        | Missense_Mutation | COSM4887185 |
| VSCC7 | chr2:220092494-220092494 | G | A | <i>ATG9A</i>     | NM_024085:exon3:c.C145T:p.R49X,ATG9A        | Nonsense_Mutation |             |
| VSCC7 | chr2:220421374-220421374 | G | A | <i>OBSL1</i>     | NM_001173431:exon13:c.C4138T;p.R1380W,OBSL1 | Missense_Mutation |             |
| VSCC7 | chr2:232323098-232323098 | G | A | <i>NCL</i>       | NM_005381:exon8:c.C1168T;p.R390X            | Nonsense_Mutation |             |
| VSCC7 | chr2:234235821-234235821 | G | A | <i>SAG</i>       | NM_000541:exon7:c.G490A:p.E164K             | Missense_Mutation |             |
| VSCC7 | chr2:235951493-235951493 | C | T | <i>SH3BP4</i>    | NM_014521:exon4:c.C2080T;p.R694W            | Missense_Mutation |             |
| VSCC7 | chr2:237103619-237103619 | G | A | <i>ASB18</i>     | NM_212556:exon6:c.C1297T;p.R433C            | Missense_Mutation |             |

|       |                          |   |   |                 |                                              |                   |             |
|-------|--------------------------|---|---|-----------------|----------------------------------------------|-------------------|-------------|
| VSCC7 | chr3:48619157-48619157   | G | A | <i>COL7A1</i>   | NM_000094:exon48:c.C4704T:p.T1568T           | Silent            |             |
| VSCC7 | chr3:49146513-49146513   | G | A | <i>USP19</i>    | NM_006677:exon26:c.C3835T:p.R1279C,USP19     | Missense_Mutation | COSM5869553 |
| VSCC7 | chr3:53920914-53920914   | C | T | <i>SELK</i>     | UNKNOWN                                      | unknown           | COSM3881711 |
| VSCC7 | chr3:88205520-88205520   | G | A | <i>C3orf38</i>  | NM_173824:exon3:c.G725A:p.R242Q              | Missense_Mutation |             |
| VSCC7 | chr3:123010043-123010043 | C | T | <i>ADCY5</i>    | NM_001199642:exon18:c.G2194A:p.E732K,ADCY5   | Missense_Mutation |             |
| VSCC7 | chr3:129177477-129177477 | G | A | <i>IFT122</i>   | NM_001280541:exon4:c.G229A:p.V77I,IFT122     | Missense_Mutation |             |
| VSCC7 | chr3:129694768-129694768 | G | A | <i>TRH</i>      | NM_007117:exon2:c.G109A:p.A37T               | Missense_Mutation |             |
| VSCC7 | chr3:130150634-130150634 | G | A | <i>COL6A5</i>   | NM_001278298:exon33:c.G5574A:p.T1858T,COL6A5 | Silent            |             |
| VSCC7 | chr3:141535699-141535699 | C | A | <i>GRK7</i>     | NM_139209:exon4:c.C1469A:p.S490Y             | Missense_Mutation |             |
| VSCC7 | chr3:175165038-175165038 | G | A | <i>NAALADL2</i> | NM_207015:exon6:c.G1112A:p.R371Q             | Missense_Mutation | COSM3632311 |
| VSCC7 | chr3:184700421-184700421 | A | T | <i>VPS8</i>     | NM_001009921:exon40:c.A3488T:p.H1163L,VPS8   | Missense_Mutation | COSM5673802 |
| VSCC7 | chr4:6611594-6611594     | C | T | <i>MAN2B2</i>   | NM_001292038:exon13:c.C1923T:p.D641D,MAN2B2  | Silent            | COSM2766930 |
| VSCC7 | chr4:77662348-77662348   | C | T | <i>SHROOM3</i>  | NM_020859:exon5:c.C3022T:p.R1008C            | Missense_Mutation |             |
| VSCC7 | chr4:100479268-100479268 | C | A | <i>TRMT10A</i>  | NM_001134665:exon3:c.G286T:p.V96F,TRMT10A    | Missense_Mutation |             |
| VSCC7 | chr4:160252850-160252850 | G | A | <i>RAPGEF2</i>  | NM_014247:exon9:c.G1161A:p.T387T             | Silent            |             |
| VSCC7 | chr4:164394719-164394719 | C | T | <i>TKTL2</i>    | NM_032136:exon1:c.G168A:p.T56T               | Silent            |             |
| VSCC7 | chr4:188924867-188924867 | G | A | <i>ZFP42</i>    | NM_001304358:exon3:c.G906A:p.T302T,ZFP42     | Silent            |             |
| VSCC7 | chr5:32090669-32090669   | G | A | <i>PDZD2</i>    | NM_178140:exon19:c.G7115A:p.R2372Q           | Missense_Mutation |             |
| VSCC7 | chr5:38950099-38950099   | G | A | <i>RICTOR</i>   | NM_001285439:exon31:c.C3851T:p.S1284L,RICTOR | Missense_Mutation |             |

|       |                          |   |   |                |                                             |                   |             |
|-------|--------------------------|---|---|----------------|---------------------------------------------|-------------------|-------------|
| VSCC7 | chr5:66461424-66461424   | G | A | <i>MAST4</i>   | NM_001290227:exon26:c.G5634A:p.T1878T,MAST4 | Silent            |             |
| VSCC7 | chr5:86676347-86676347   | G | T | <i>RASA1</i>   | NM_002890:exon20:c.G2625T:p.G875G,RASA1     | Silent            |             |
| VSCC7 | chr5:98234465-98234465   | C | T | <i>CHD1</i>    | NM_001270:exon8:c.G1089A:p.L363L            | Silent            |             |
| VSCC7 | chr5:102260735-102260735 | G | A | <i>PAM</i>     | NM_000919:exon5:c.G431A:p.R144Q,PAM         | Missense_Mutation | COSM4163799 |
| VSCC7 | chr5:115238635-115238635 | T | C | <i>AP3S1</i>   | NM_001284:exon5:c.T399C:p.N133N             | Silent            |             |
| VSCC7 | chr5:129243981-129243981 | G | A | <i>CHSY3</i>   | NM_175856:exon2:c.G1014A:p.T338T            | Silent            |             |
| VSCC7 | chr5:133942678-133942678 | C | T | <i>SAR1B</i>   | NM_016103:exon7:c.G559A:p.G187R,SAR1B       | Missense_Mutation |             |
| VSCC7 | chr5:141335273-141335273 | G | A | <i>PCDH12</i>  | NM_016580:exon1:c.C2144T:p.S715L            | Missense_Mutation |             |
| VSCC7 | chr5:145895078-145895078 | G | A | <i>GPR151</i>  | NM_194251:exon1:c.C599T:p.S200L             | Missense_Mutation | COSM5352128 |
| VSCC7 | chr5:156589492-156589492 | G | A | <i>FAM71B</i>  | NM_130899:exon2:c.C1784T:p.T595M            | Missense_Mutation |             |
| VSCC7 | chr5:172590826-172590826 | C | T | <i>BNIP1</i>   | NM_013978:exon5:c.C487T:p.R163W,BNIP1       | Missense_Mutation |             |
| VSCC7 | chr5:176813546-176813546 | G | A | <i>SLC34A1</i> | NM_001167579:exon5:c.G511A:p.V171I,SLC34A1  | Missense_Mutation |             |
| VSCC7 | chr6:36995846-36995846   | G | A | <i>FGD2</i>    | NM_173558:exon16:c.G1875A:p.T625T           | Silent            |             |
| VSCC7 | chr6:41127562-41127562   | G | A | <i>TREM2</i>   | NM_001271821:exon3:c.C450T:p.F150F,TREM2    | Silent            | COSM3321574 |
| VSCC7 | chr6:43152268-43152268   | G | A | <i>CUL9</i>    | NM_015089:exon2:c.G220A:p.A74T              | Missense_Mutation |             |
| VSCC7 | chr6:43230716-43230716   | C | T | <i>TTBK1</i>   | NM_032538:exon13:c.C1614T:p.F538F           | Silent            |             |
| VSCC7 | chr6:43515346-43515346   | C | T | <i>XPO5</i>    | NM_020750:exon19:c.G2159A:p.R720Q           | Missense_Mutation | COSM1247036 |
| VSCC7 | chr6:46657580-46657580   | G | A | <i>TDRD6</i>   | NM_001010870:exon1:c.G1715A:p.R572Q,TDRD6   | Missense_Mutation |             |

|       |                          |   |   |                |                                              |                   |             |
|-------|--------------------------|---|---|----------------|----------------------------------------------|-------------------|-------------|
| VSCC7 | chr6:89974320-89974320   | C | T | <i>GABRR2</i>  | NM_002043:exon8:c.G897A:p.T299T              | Silent            |             |
| VSCC7 | chr6:90442491-90442491   | G | C | <i>MDN1</i>    | NM_014611:exon34:c.C4727G:p.S1576C           | Missense_Mutation | COSM3441038 |
| VSCC7 | chr6:135811853-135811853 | G | A | <i>AHI1</i>    | NM_001134830:exon3:c.C43T:p.R15C,AHI1        | Missense_Mutation |             |
| VSCC7 | chr6:137528165-137528165 | G | A | <i>IFNGR1</i>  | NM_000416:exon2:c.C135T:p.I45I               | Silent            | COSM5566959 |
| VSCC7 | chr6:151277158-151277158 | G | A | <i>MTHFD1L</i> | NM_001242767:exon17:c.G1757A:p.R586Q,MTHFD1L | Missense_Mutation | COSM4816593 |
| VSCC7 | chr6:152621904-152621904 | G | A | <i>SYNE1</i>   | NM_033071:exon92:c.C17341T:p.R5781C,SYNE1    | Missense_Mutation |             |
| VSCC7 | chr7:5270512-5270512     | C | T | <i>WIPI2</i>   | NM_001033520:exon10:c.C1089T:p.D363D,WIPI2   | Silent            | COSM5578931 |
| VSCC7 | chr7:5567455-5567455     | G | C | <i>ACTB</i>    | NM_001101:exon6:c.C1052G:p.T351S             | Missense_Mutation |             |
| VSCC7 | chr7:32909908-32909908   | C | A | <i>KBTBD2</i>  | NM_015483:exon4:c.G921T:p.K307N              | Missense_Mutation |             |
| VSCC7 | chr7:45120832-45120832   | G | A | <i>NACAD</i>   | NM_001146334:exon5:c.C4288T:p.Q1430X         | Nonsense_Mutation |             |
| VSCC7 | chr7:100479772-100479772 | C | T | <i>SRRT</i>    | NM_001128852:exon5:c.C497T:p.T166M,SRRT      | Missense_Mutation |             |
| VSCC7 | chr7:100638908-100638908 | C | T | <i>MUC12</i>   | NM_001164462:exon2:c.C5064T:p.T1688T         | Silent            |             |
| VSCC7 | chr7:117232697-117232697 | G | A | <i>CFTR</i>    | NM_000492:exon14:c.G2476A:p.E826K            | Missense_Mutation | COSM2114866 |
| VSCC7 | chr7:120906851-120906851 | A | C | <i>CPED1</i>   | NM_024913:exon20:c.A2622C:p.K874N            | Missense_Mutation |             |
| VSCC7 | chr7:121773596-121773596 | G | A | <i>AASS</i>    | NM_005763:exon2:c.C185T:p.S62L               | Missense_Mutation |             |
| VSCC7 | chr8:25364355-25364355   | G | C | <i>CDCA2</i>   | NM_152562:exon15:c.G2173C:p.D725H            | Missense_Mutation | COSM933635  |
| VSCC7 | chr8:42563966-42563966   | C | T | <i>CHRN3</i>   | NM_000749:exon2:c.C159T:p.T53T               | Silent            | COSM4740273 |
| VSCC7 | chr8:42711484-42711484   | G | A | <i>RNF170</i>  | NM_001160223:exon7:c.C595T:p.R199C,RNF170    | Missense_Mutation | COSM1317264 |

|       |                          |   |   |                 |                                             |                   |              |             |
|-------|--------------------------|---|---|-----------------|---------------------------------------------|-------------------|--------------|-------------|
| VSCC7 | chr8:55540659-55540659   | A | G | <i>RP1</i>      | NM_006269:exon4:c.A4217G:p.K1406R           | Missense_Mutation |              | COSM2017199 |
| VSCC7 | chr8:73480241-73480241   | G | T | <i>KCNB2</i>    | NM_004770:exon2:c.G272T:p.R91L              | Missense_Mutation |              |             |
| VSCC7 | chr8:74005207-74005207   | C | T | <i>SBS PON</i>  | NM_153225:exon1:c.G96A:p.R32R               | Silent            |              |             |
| VSCC7 | chr8:77766267-77766267   | G | A | <i>ZFH X4</i>   | NM_024721:exon10:c.G7110A:p.T2370T          | Silent            |              |             |
| VSCC7 | chr8:92090827-92090827   | A | G | <i>OTUD6B</i>   | NM_016023:exon4:c.A649G:p.M217V,OTUD6B      | Missense_Mutation |              |             |
| VSCC7 | chr8:95683865-95683865   | G | A | <i>ESRP1</i>    | NM_001034915:exon11:c.G1418A:p.R473H,ESRP1  | Missense_Mutation |              | COSM467609  |
| VSCC7 | chr2:141665596-141665596 | C | G | <i>LRP1B</i>    | NM_018557:exon22:c.G3370C:p.D1124H          | Missense_Mutation | <i>LRP1B</i> | COSM4169244 |
| VSCC7 | chr9:33799163-33799163   | C | A | <i>PRSS3</i>    | NM_001197098:exon5:c.C708A:p.I236I,PRSS3    | Silent            |              |             |
| VSCC7 | chr9:35612975-35612975   | G | A | <i>CD72</i>     | NM_001782:exon6:c.C704T:p.S235L             | Missense_Mutation |              |             |
| VSCC7 | chr9:72338499-72338499   | G | A | <i>PTAR1</i>    | NM_001099666:exon6:c.C690T:p.H230H          | Silent            |              |             |
| VSCC7 | chr9:91690062-91690062   | T | C | <i>SHC3</i>     | NM_016848:exon4:c.A691G:p.T231A             | Missense_Mutation |              | COSM1178149 |
| VSCC7 | chr9:91940517-91940517   | C | T | <i>SECISBP2</i> | NM_001282688:exon3:c.C358T:p.R120X,SECISBP2 | Nonsense_Mutation |              | COSM4041682 |
| VSCC7 | chr9:96429416-96429416   | G | A | <i>PHF2</i>     | NM_005392:exon17:c.G2242A:p.G748S           | Missense_Mutation |              |             |
| VSCC7 | chr9:104302573-104302573 | G | A | <i>RNF20</i>    | NM_019592:exon3:c.G218A:p.R73H              | Missense_Mutation |              |             |
| VSCC7 | chr9:107560804-107560804 | G | A | <i>ABCA1</i>    | NM_005502:exon37:c.C5019T:p.V1673V          | Silent            |              |             |
| VSCC7 | chr9:113169034-113169034 | C | A | <i>SVEP1</i>    | NM_153366:exon38:c.G8846T:p.C2949F          | Missense_Mutation |              |             |
| VSCC7 | chr9:115567073-115567073 | C | T | <i>SNX30</i>    | NM_001012994:exon2:c.C174T:p.N58N           | Silent            |              |             |
| VSCC7 | chr9:118950133-118950133 | C | T | <i>PAPPA</i>    | NM_002581:exon2:c.C1116T:p.R372R            | Silent            |              | COSM3728330 |



|       |                           |   |   |                 |                                             |                   |             |
|-------|---------------------------|---|---|-----------------|---------------------------------------------|-------------------|-------------|
| VSCC7 | chr9:130928634-130928634  | G | A | <i>CIZ1</i>     | NM_001257976:exon16:c.C2236T:p.R746W,CIZ1   | Missense_Mutation | COSM4039088 |
| VSCC7 | chr9:131589413-131589413  | G | A | <i>C9orf114</i> | NM_016390:exon4:c.C266T:p.S89L              | Missense_Mutation |             |
| VSCC7 | chr9:135759368-135759368  | G | A | <i>C9orf9</i>   | NM_001316897:exon2:c.G34A:p.E12K,C9orf9     | Missense_Mutation |             |
| VSCC7 | chr10:5979184-5979184     | C | T | <i>FBXO18</i>   | NM_178150:exon21:c.C3073T:p.R1025C,FBXO18   | Missense_Mutation |             |
| VSCC7 | chr10:84733607-84733607   | G | A | <i>NRG3</i>     | NM_001010848:exon7:c.G1348A:p.G450S,NRG3    | Missense_Mutation |             |
| VSCC7 | chr10:93952265-93952265   | G | A | <i>CPEB3</i>    | NM_014912:exon3:c.C1134T:p.F378F            | Silent            |             |
| VSCC7 | chr10:105765771-105765771 | G | A | <i>SLK</i>      | NM_001304743:exon11:c.G2582A:p.R861Q,SLK    | Missense_Mutation |             |
| VSCC7 | chr10:111884032-111884032 | G | A | <i>ADD3</i>     | NM_0011121:exon10:c.G1401A:p.T467T,ADD3     | Silent            |             |
| VSCC7 | chr10:114192253-114192253 | A | G | <i>ZDHHC6</i>   | NM_001303134:exon9:c.T960C:p.Y320Y,ZDHHC6   | Silent            |             |
| VSCC7 | chr10:115609064-115609064 | C | T | <i>DCLRE1A</i>  | NM_014881:exon2:c.G1800A:p.K600K,DCLRE1A    | Silent            |             |
| VSCC7 | chr10:115981217-115981217 | C | T | <i>TDRD1</i>    | NM_198795:exon20:c.C2872T:p.L958L           | Silent            |             |
| VSCC7 | chr10:116603677-116603677 | G | A | <i>FAM160B1</i> | NM_001135051:exon7:c.G994A:p.V332M,FAM160B1 | Missense_Mutation |             |
| VSCC7 | chr11:5068663-5068663     | G | A | <i>OR52J3</i>   | NM_001001916:exon1:c.G908A:p.R303Q          | Missense_Mutation | COSM959850  |
| VSCC7 | chr11:6964423-6964423     | G | A | <i>ZNF215</i>   | NM_013250:exon5:c.G593A:p.R198K             | Missense_Mutation |             |
| VSCC7 | chr11:33076192-33076192   | G | A | <i>TCP11L1</i>  | NM_001145541:exon3:c.G217A:p.V73I,TCP11L1   | Missense_Mutation |             |
| VSCC7 | chr11:46564615-46564615   | G | A | <i>AMBRA1</i>   | NM_001300731:exon7:c.C952T:p.R318X          | Nonsense_Mutation | COSM2219890 |
| VSCC7 | chr11:46880702-46880702   | G | A | <i>LRP4</i>     | NM_002334:exon38:c.C5550T:p.I1850I          | Silent            | COSM963580  |
| VSCC7 | chr11:64003398-64003398   | G | A | <i>VEGFB</i>    | NM_001243733:exon3:c.G217A:p.V73M,VEGFB     | Missense_Mutation |             |

|       |                           |   |   |                 |                                             |                   |             |
|-------|---------------------------|---|---|-----------------|---------------------------------------------|-------------------|-------------|
| VSCC7 | chr11:67432799-67432799   | G | A | <i>ALDH3B2</i>  | NM_000695:exon7:c.C663T:p.R221R,ALDH3B2     | Silent            |             |
| VSCC7 | chr11:73687990-73687990   | G | A | <i>UCP2</i>     | NM_003355:exon5:c.C410T:p.T137M             | Missense_Mutation |             |
| VSCC7 | chr11:101775633-101775633 | G | A | <i>ANGPTL5</i>  | NM_178127:exon5:c.C351T:p.N117N             | Silent            | COSM971036  |
| VSCC7 | chr11:107312265-107312265 | C | T | <i>CWF19L2</i>  | NM_152434:exon5:c.G534A:p.R178R             | Silent            |             |
| VSCC7 | chr11:128354844-128354844 | C | T | <i>ETS1</i>     | NM_005238:exon5:c.G604A:p.E202K,ETS1        | Missense_Mutation |             |
| VSCC7 | chr11:128839937-128839937 | C | T | <i>ARHGAP32</i> | NM_014715:exon13:c.G4082A:p.R1361H,ARHGAP32 | Missense_Mutation | COSM1210599 |
| VSCC7 | chr12:11506932-11506932   | A | C | <i>PRB1</i>     | NM_199353:exon3:c.T105G:p.N35K,PRB1         | Missense_Mutation |             |
| VSCC7 | chr12:13717347-13717347   | G | A | <i>GRIN2B</i>   | NM_000834:exon13:c.C2825T:p.T942M           | Missense_Mutation |             |
| VSCC7 | chr12:25148821-25148821   | C | T | <i>C12orf77</i> | NM_001101339:exon3:c.G327A:p.T109T          | Silent            |             |
| VSCC7 | chr12:31944956-31944956   | G | A | <i>H3F3C</i>    | NM_001013699:exon1:c.C145T:p.R49X           | Nonsense_Mutation |             |
| VSCC7 | chr12:41327522-41327522   | G | A | <i>CNTN1</i>    | NM_175038:exon7:c.G794A:p.R265Q,CNTN1       | Missense_Mutation |             |
| VSCC7 | chr12:53040720-53040720   | C | T | <i>KRT2</i>     | NM_000423:exon7:c.G1273A:p.A425T            | Missense_Mutation | COSM4169244 |
| VSCC7 | chr12:56345838-56345838   | G | A | <i>DGKA</i>     | NM_001345:exon19:c.G1607A:p.R536Q,DGKA      | Missense_Mutation | COSM435868  |
| VSCC7 | chr12:57578934-57578934   | G | A | <i>LRP1</i>     | NM_002332:exon40:c.G6409A:p.G2137S          | Missense_Mutation |             |
| VSCC7 | chr12:57579581-57579581   | G | A | <i>LRP1</i>     | NM_002332:exon41:c.G6731A:p.R2244Q          | Missense_Mutation | COSM4854871 |
| VSCC7 | chr12:106633455-106633455 | C | T | <i>CKAP4</i>    | NM_006825:exon2:c.G1156A:p.G386R            | Missense_Mutation |             |
| VSCC7 | chr12:109186523-109186523 | C | T | <i>SSH1</i>     | NM_001161331:exon13:c.G1465A:p.D489N,SSH1   | Missense_Mutation | COSM5439527 |
| VSCC7 | chr12:116425055-116425055 | G | A | <i>MED13L</i>   | NM_015335:exon18:c.C3973T:p.R1325C          | Missense_Mutation |             |

|       |                           |   |   |                |                                                 |                       |             |
|-------|---------------------------|---|---|----------------|-------------------------------------------------|-----------------------|-------------|
| VSCC7 | chr12:118469012-118469012 | G | A | <i>RFC5</i>    | NM_001206801:exon11:c.G943A<br>:p.E315K,RFC5    | Missense_M<br>utation | COSM1476005 |
| VSCC7 | chr13:33635511-33635511   | C | T | <i>KL</i>      | NM_004795:exon4:c.C2295T:p.F<br>765F            | Silent                |             |
| VSCC7 | chr13:52513259-52513259   | C | T | <i>ATP7B</i>   | NM_001005918:exon13:c.G3006<br>A:p.L1002L,ATP7B | Silent                |             |
| VSCC7 | chr13:88328512-88328512   | C | T | <i>SLITRK5</i> | NM_015567:exon2:c.C869T:p.S2<br>90F             | Missense_M<br>utation |             |
| VSCC7 | chr13:99449423-99449423   | C | T | <i>DOCK9</i>   | UNKNOWN                                         | unknown               | COSM4169244 |
| VSCC7 | chr13:113464952-113464952 | G | A | <i>ATP11A</i>  | NM_015205:exon5:c.G353A:p.R<br>118Q,ATP11A      | Missense_M<br>utation |             |
| VSCC7 | chr14:35465963-35465963   | G | A | <i>SRP54</i>   | NM_003136:exon2:c.G48A:p.S1<br>6S               | Silent                |             |
| VSCC7 | chr14:79175799-79175799   | T | A | <i>NRXN3</i>   | NM_004796:exon4:c.T342A:p.T1<br>14T             | Silent                | COSM1610421 |
| VSCC7 | chr14:91884018-91884018   | G | C | <i>CCDC88C</i> | NM_001080414:exon1:c.C17G:p.<br>S6W             | Missense_M<br>utation | COSM3193457 |
| VSCC7 | chr14:105176474-105176474 | G | A | <i>INF2</i>    | NM_001031714:exon13:c.G2188<br>A:p.V730M,INF2   | Missense_M<br>utation | COSM3196517 |
| VSCC7 | chr14:105920632-105920632 | G | A | <i>MTA1</i>    | NM_001203258:exon7:c.G535A:<br>p.D179N,MTA1     | Missense_M<br>utation | COSM4068673 |
| VSCC7 | chr15:23002903-23002903   | C | T | <i>CYFIP1</i>  | NM_001033028:exon16:c.C2332<br>T:p.R778C,CYFIP1 | Missense_M<br>utation |             |
| VSCC7 | chr15:43658847-43658847   | C | T | <i>ZSCAN29</i> | NM_152455:exon3:c.G683A:p.R<br>228K             | Missense_M<br>utation | COSM4069051 |
| VSCC7 | chr15:45389889-45389889   | C | T | <i>DUOX2</i>   | NM_014080:exon28:c.G3616A:p.<br>A1206T          | Missense_M<br>utation |             |
| VSCC7 | chr15:59974609-59974609   | C | T | <i>BNIP2</i>   | NM_004330:exon2:c.G411A:p.P<br>137P             | Silent                |             |
| VSCC7 | chr15:62208031-62208031   | G | A | <i>VPS13C</i>  | NM_017684:exon59:c.C8117T:p.<br>T2706M,VPS13C   | Missense_M<br>utation | COSM5798496 |
| VSCC7 | chr15:68504054-68504054   | G | A | <i>CLN6</i>    | NM_017882:exon4:c.C445T:p.R1<br>49C             | Missense_M<br>utation |             |
| VSCC7 | chr15:75694296-75694296   | G | A | <i>SIN3A</i>   | NM_001145357:exon10:c.C1423<br>T:p.R475W,SIN3A  | Missense_M<br>utation |             |
| VSCC7 | chr16:1444185-1444185     | C | T | <i>UNKL</i>    | NM_001193388:exon7:c.G884A:<br>p.R295H          | Missense_M<br>utation | COSM3524225 |

|       |                         |   |   |                  |                                              |                   |             |
|-------|-------------------------|---|---|------------------|----------------------------------------------|-------------------|-------------|
| VSCC7 | chr16:4848631-4848631   | C | T | <i>ROGDI</i>     | NM_024589:exon7:c.G470A:p.R157Q              | Missense_Mutation |             |
| VSCC7 | chr16:14742420-14742420 | G | A | <i>BFAR</i>      | NM_016561:exon3:c.G439A:p.G147S              | Missense_Mutation |             |
| VSCC7 | chr16:19127388-19127388 | G | A | <i>ITPRIPL2</i>  | NM_001034841:exon1:c.G1605A:p.P535P          | Silent            | COSM1582374 |
| VSCC7 | chr16:27356198-27356198 | C | T | <i>ILAR</i>      | NM_001257406:exon4:c.C218T:p.T73M,IL4R       | Missense_Mutation | COSM1476005 |
| VSCC7 | chr16:27497406-27497406 | C | T | <i>GTF3C1</i>    | NM_001286242:exon24:c.G3770A:p.R1257Q,GTF3C1 | Missense_Mutation |             |
| VSCC7 | chr16:27692753-27692753 | G | A | <i>KIAA0556</i>  | NM_015202:exon8:c.G842A:p.R281Q              | Missense_Mutation | COSM5037862 |
| VSCC7 | chr16:67916943-67916943 | G | A | <i>EDC4</i>      | NM_014329:exon27:c.G3712A:p.V1238I           | Missense_Mutation | COSM4679190 |
| VSCC7 | chr16:68108048-68108048 | C | T | <i>DUS2</i>      | NM_001271763:exon11:c.C817T:p.R273W,DUS2     | Missense_Mutation | COSM3227302 |
| VSCC7 | chr16:70305775-70305775 | G | A | <i>AARS</i>      | NM_001605:exon5:c.C580T:p.R194W              | Missense_Mutation |             |
| VSCC7 | chr16:84229436-84229436 | G | A | <i>ADAD2</i>     | NM_001145400:exon7:c.G1068A:p.S356S,ADAD2    | Silent            |             |
| VSCC7 | chr16:85697029-85697029 | G | A | <i>GSE1</i>      | NM_001134473:exon10:c.G2141A:p.R714Q,GSE1    | Missense_Mutation |             |
| VSCC7 | chr16:88666329-88666329 | G | A | <i>ZC3H18</i>    | NM_144604:exon6:c.G1061A:p.R354Q,ZC3H18      | Missense_Mutation |             |
| VSCC7 | chr17:293095-293095     | C | T | <i>FAM101B</i>   | UNKNOWN                                      | unknown           | COSM4169244 |
| VSCC7 | chr17:6928502-6928502   | G | A | <i>BCL6B</i>     | NM_181844:exon5:c.G872A:p.R291Q              | Missense_Mutation |             |
| VSCC7 | chr17:7129587-7129587   | C | T | <i>DVL2</i>      | NM_004422:exon15:c.G1808A:p.R603H            | Missense_Mutation |             |
| VSCC7 | chr17:17179426-17179426 | C | T | <i>COPS3</i>     | NM_001199125:exon2:c.G48A:p.A16A,COPS3       | Silent            |             |
| VSCC7 | chr17:17699466-17699466 | G | A | <i>RAI1</i>      | NM_030665:exon3:c.G3204A:p.T1068T            | Silent            |             |
| VSCC7 | chr17:33984730-33984730 | G | A | <i>AP2B1</i>     | NM_001030006:exon14:c.G1909A:p.G637S,AP2B1   | Missense_Mutation |             |
| VSCC7 | chr17:41858521-41858521 | G | A | <i>C17orf105</i> | NM_001136483:exon2:c.G159A:p.A53A            | Silent            |             |

|       |                         |   |   |                   |                                            |                   |             |
|-------|-------------------------|---|---|-------------------|--------------------------------------------|-------------------|-------------|
| VSCC7 | chr17:42964077-42964077 | G | A | <i>EFTUD2</i>     | NM_001142605:exon2:c.C42T:p.D14D,EFTUD2    | Silent            |             |
| VSCC7 | chr17:46629792-46629792 | G | A | <i>HOXB3</i>      | NM_002146:exon3:c.C45T:p.F15F              | Silent            |             |
| VSCC7 | chr17:49825064-49825064 | G | A | <i>CA10</i>       | NM_020178:exon4:c.C394T:p.R132X,CA10       | Nonsense_Mutation | COSM146130  |
| VSCC7 | chr17:57963580-57963580 | G | A | <i>TUBD1</i>      | NM_001193609:exon3:c.C184T:p.R62W,TUBD1    | Missense_Mutation | COSM3746499 |
| VSCC7 | chr17:62019209-62019209 | G | A | <i>SCN4A</i>      | NM_000334:exon24:c.C4433T:p.S1478L         | Missense_Mutation |             |
| VSCC7 | chr17:62582218-62582218 | G | A | <i>SMURF2</i>     | NM_022739:exon6:c.C471T:p.N157N            | Silent            |             |
| VSCC7 | chr17:67110969-67110969 | G | A | <i>ABCA6</i>      | NM_080284:exon13:c.C1716T:p.T572T          | Silent            |             |
| VSCC7 | chr17:74639634-74639634 | G | A | <i>ST6GALNAC1</i> | NM_018414:exon1:c.C87T:p.F29F              | Silent            |             |
| VSCC7 | chr17:76047223-76047223 | G | A | <i>TNRC6C</i>     | NM_001142640:exon4:c.G2080A:p.G694R,TNRC6C | Missense_Mutation |             |
| VSCC7 | chr17:79662978-79662978 | G | A | <i>HGS</i>        | NM_004712:exon15:c.G1342A:p.G448S          | Missense_Mutation |             |
| VSCC7 | chr17:80615898-80615898 | C | T | <i>RAB40B</i>     | NM_006822:exon6:c.G678A:p.S226S            | Silent            | COSM475262  |
| VSCC7 | chr18:9950395-9950395   | G | C | <i>VAPA</i>       | NM_194434:exon5:c.G421C:p.D141H,VAPA       | Missense_Mutation |             |
| VSCC7 | chr18:12009942-12009942 | G | A | <i>IMPA2</i>      | NM_014214:exon3:c.G291A:p.T97T             | Silent            |             |
| VSCC7 | chr18:32459629-32459629 | G | A | <i>DTNA</i>       | NM_001198943:exon10:c.G1097A:p.R366Q,DTNA  | Missense_Mutation |             |
| VSCC7 | chr18:33267135-33267135 | G | A | <i>GALNT1</i>     | NM_020474:exon5:c.G845A:p.R282Q            | Missense_Mutation |             |
| VSCC7 | chr18:50734143-50734143 | C | T | <i>DCC</i>        | NM_005215:exon11:c.C1817T:p.P606L          | Missense_Mutation | COSM3799738 |
| VSCC7 | chr19:1466533-1466533   | C | T | <i>APC2</i>       | NM_005883:exon15:c.C3233T:p.S1078L         | Missense_Mutation |             |
| VSCC7 | chr19:1584615-1584615   | G | A | <i>MBD3</i>       | NM_001281453:exon3:c.C332T:p.P111L,MBD3    | Missense_Mutation |             |

|       |                         |   |   |                 |                                                 |                       |             |
|-------|-------------------------|---|---|-----------------|-------------------------------------------------|-----------------------|-------------|
| VSCC7 | chr19:2191212-2191212   | G | A | <i>DOTIL</i>    | NM_032482:exon5:c.G466A:p.D<br>156N             | Missense_M<br>utation |             |
| VSCC7 | chr19:4216634-4216634   | C | T | <i>ANKRD24</i>  | NM_133475:exon18:c.C1477T:p.<br>R493W           | Missense_M<br>utation |             |
| VSCC7 | chr19:5832261-5832261   | G | A | <i>FUT6</i>     | NM_001040701:exon2:c.C318T:<br>p.I106I,FUT6     | Silent                | COSM4740954 |
| VSCC7 | chr19:6760956-6760956   | G | A | <i>SH2D3A</i>   | NM_005490:exon3:c.C112T:p.R3<br>8C              | Missense_M<br>utation | COSM1726743 |
| VSCC7 | chr19:10568646-10568646 | G | A | <i>PDE4A</i>    | NM_006202:exon3:c.G252A:p.P<br>84P,PDE4A        | Silent                | COSM2822456 |
| VSCC7 | chr19:10738617-10738617 | G | A | <i>SLC44A2</i>  | NM_001145056:exon4:c.G176A:<br>p.R59Q,SLC44A2   | Missense_M<br>utation |             |
| VSCC7 | chr19:11558331-11558331 | G | A | <i>PRKCSH</i>   | NM_001289102:exon10:c.G927A<br>:p.S309S,PRKCSH  | Silent                |             |
| VSCC7 | chr19:16910878-16910878 | G | A | <i>NWD1</i>     | NM_001007525:exon17:c.G3641<br>A:p.R1214H,NWD1  | Missense_M<br>utation |             |
| VSCC7 | chr19:30165485-30165485 | G | A | <i>PLEKHF1</i>  | NM_024310:exon2:c.G739A:p.D<br>247N             | Missense_M<br>utation |             |
| VSCC7 | chr19:36145502-36145502 | G | A | <i>COX6B1</i>   | NM_001863:exon3:c.G136A:p.A<br>46T              | Missense_M<br>utation |             |
| VSCC7 | chr19:36430556-36430556 | C | T | <i>LRFN3</i>    | NM_024509:exon2:c.C229T:p.R7<br>7C              | Missense_M<br>utation |             |
| VSCC7 | chr19:40486260-40486260 | G | A | <i>PSMC4</i>    | NM_006503:exon9:c.G986A:p.R<br>329H,PSMC4       | Missense_M<br>utation | COSM1331935 |
| VSCC7 | chr19:40832378-40832378 | C | T | <i>C19orf47</i> | NM_001256440:exon7:c.G566A:<br>p.R189Q,C19orf47 | Missense_M<br>utation |             |
| VSCC7 | chr19:44223252-44223252 | G | A | <i>IRGC</i>     | NM_019612:exon2:c.G542A:p.R<br>181Q             | Missense_M<br>utation |             |
| VSCC7 | chr19:44892225-44892225 | T | G | <i>ZNF285</i>   | NM_001291489:exon4:c.A182C:<br>p.K61T,ZNF285    | Missense_M<br>utation | COSM3406419 |
| VSCC7 | chr19:44892228-44892228 | G | C | <i>ZNF285</i>   | NM_001291489:exon4:c.C179G:<br>p.A60G,ZNF285    | Missense_M<br>utation |             |
| VSCC7 | chr19:47280269-47280269 | C | T | <i>SLC1A5</i>   | NM_001145145:exon6:c.G745A:<br>p.D249N,SLC1A5   | Missense_M<br>utation |             |
| VSCC7 | chr19:47844488-47844488 | G | A | <i>C5AR2</i>    | NM_001271749:exon2:c.G432A:<br>p.T144T,C5AR2    | Silent                |             |

|       |                         |   |   |                 |                                          |                   |             |
|-------|-------------------------|---|---|-----------------|------------------------------------------|-------------------|-------------|
| VSCC7 | chr19:50339170-50339170 | C | T | <i>MED25</i>    | NM_030973:exon16:c.C1933T:p.Q645X        | Nonsense_Mutation |             |
| VSCC7 | chr19:51329935-51329935 | C | T | <i>KLK15</i>    | NM_001277081:exon4:c.G557A:p.R186H,KLK15 | Missense_Mutation | COSM1112287 |
| VSCC7 | chr19:52001390-52001390 | C | T | <i>SIGLEC12</i> | NM_033329:exon4:c.G933A:p.G311G,SIGLEC12 | Silent            |             |
| VSCC7 | chr19:54963342-54963342 | G | A | <i>LENG8</i>    | NM_052925:exon3:c.G111A:p.P37P           | Silent            |             |
| VSCC7 | chr19:55106239-55106239 | G | A | <i>LILRA1</i>   | NM_001278319:exon3:c.G180A:p.L60L,LILRA1 | Silent            |             |
| VSCC7 | chr20:18143305-18143305 | G | A | <i>CSRP2BP</i>  | NM_020536:exon6:c.G1387A:p.V463M         | Missense_Mutation |             |
| VSCC7 | chr20:18286970-18286970 | C | A | <i>ZNF133</i>   | NM_001283006:exon2:c.C171A:p.I57I,ZNF133 | Silent            |             |
| VSCC7 | chr20:18370438-18370438 | C | T | <i>DZANK1</i>   | NM_001099407:exon19:c.G1925A:p.R642Q     | Missense_Mutation | COSM676883  |
| VSCC7 | chr20:47649659-47649659 | C | T | <i>ARFGEF2</i>  | NM_006420:exon39:c.C5281T:p.R1761W       | Missense_Mutation |             |
| VSCC7 | chr20:60908513-60908513 | C | T | <i>LAMA5</i>    | NM_005560:exon25:c.G3046A:p.A1016T       | Missense_Mutation |             |
| VSCC7 | chr20:60921795-60921795 | G | A | <i>LAMA5</i>    | NM_005560:exon8:c.C1134T:p.R378R         | Silent            |             |
| VSCC7 | chr20:62642824-62642824 | G | A | <i>PRPF6</i>    | NM_012469:exon11:c.G1492A:p.G498S        | Missense_Mutation | COSM5589598 |
| VSCC7 | chr21:33076217-33076217 | G | A | <i>SCAF4</i>    | NM_001145444:exon3:c.C137T:p.P46L,SCAF4  | Missense_Mutation |             |
| VSCC7 | chr21:43693475-43693475 | G | A | <i>ABCG1</i>    | NM_004915:exon4:c.G467A:p.R156Q,ABCG1    | Missense_Mutation |             |
| VSCC7 | chr21:44293795-44293795 | G | A | <i>WDR4</i>     | NM_001260474:exon3:c.C162T:p.D54D,WDR4   | Silent            |             |
| VSCC7 | chr21:47404310-47404310 | G | A | <i>COL6A1</i>   | NM_001848:exon3:c.G355A:p.A119T          | Missense_Mutation | COSM911775  |
| VSCC7 | chr21:47546124-47546124 | G | A | <i>COL6A2</i>   | NM_001849:exon26:c.G2395A:p.D799N,COL6A2 | Missense_Mutation |             |
| VSCC7 | chr21:47711368-47711368 | G | A | <i>YBEY</i>     | NM_001006114:exon3:c.G331A:p.V111I,YBEY  | Missense_Mutation | COSM3749073 |

|       |                          |   |   |                 |                                               |                   |                |
|-------|--------------------------|---|---|-----------------|-----------------------------------------------|-------------------|----------------|
| VSCC7 | chr22:29725703-29725703  | C | G | <i>AP1B1</i>    | NM_001127:exon22:c.G2773C:p.E925Q             | Missense_Mutation | COSM2184791    |
| VSCC7 | chr22:32097652-32097652  | G | A | <i>PRR14L</i>   | NM_173566:exon7:c.C6097T:p.R2033X             | Nonsense_Mutation |                |
| VSCC7 | chr22:38121301-38121301  | C | A | <i>TRIOBP</i>   | NM_001039141:exon7:c.C2738A:p.P913Q           | Missense_Mutation |                |
| VSCC7 | chr22:44692612-44692612  | G | A | <i>KIAA1644</i> | NM_001099294:exon3:c.C221T:p.T74M             | Missense_Mutation | COSM5491258    |
| VSCC7 | chrX:18192184-18192184   | G | C | <i>BEND2</i>    | NM_001184767:exon10:c.C1674G:p.S558S,BEND2    | Silent            |                |
| VSCC7 | chrX:22291956-22291956   | C | T | <i>ZNF645</i>   | NM_152577:exon1:c.C848T:p.A283V               | Missense_Mutation |                |
| VSCC7 | chrX:35984695-35984695   | C | T | <i>CFAP47</i>   | NM_001304548:exon9:c.C1424T:p.S475L,CFAP47    | Missense_Mutation | COSM5047911    |
| VSCC7 | chrX:37028205-37028205   | T | C | <i>FAM47C</i>   | NM_001013736:exon1:c.T1722C:p.P574P           | Silent            |                |
| VSCC7 | chrX:48564987-48564987   | C | T | <i>SUV39H1</i>  | NM_001282166:exon5:c.C1107T:p.G369G,SUV39H1   | Silent            |                |
| VSCC7 | chrX:49110498-49110498   | C | T | <i>FOXP3</i>    | NM_001114377:exon8:c.G742A:p.V248I,FOXP3      | Missense_Mutation |                |
| VSCC7 | chrX:53573752-53573752   | C | A | <i>HUWE1</i>    | NM_031407:exon69:c.G10671T:p.A3557A           | Silent            |                |
| VSCC7 | chrX:70368701-70368701   | C | T | <i>NLGN3</i>    | NM_181303:exon3:c.C463T:p.R155W               | Missense_Mutation | COSM5756107    |
| VSCC7 | chrX:101912053-101912053 | C | T | <i>GPRASP1</i>  | NM_001099411:exon3:c.C3212T:p.P1071L,GPRASP1  | Missense_Mutation |                |
| VSCC7 | chrX:102931423-102931423 | G | A | <i>MORF4L2</i>  | NM_001142420:exon3:c.C533T:p.A178V,MORF4L2    | Missense_Mutation |                |
| VSCC7 | chrX:106229334-106229334 | G | A | <i>MORC4</i>    | NM_001085354:exon4:c.C405T:p.D135D,MORC4      | Silent            |                |
| VSCC7 | chrX:110395675-110395675 | G | A | <i>PAK3</i>     | NM_001128167:exon5:c.G468A:p.S156S,PAK3       | Silent            |                |
| VSCC7 | chr17:36865522-36865522  | G | A | <i>MLLT6</i>    | NM_005937:exon5:c.G451A:p.V151I               | Missense_Mutation | <i>MLLT6</i>   |
| VSCC7 | chr19:11144179-11144179  | G | A | <i>SMARCA4</i>  | NM_001128845:exon25:c.G3760A:p.E1254K,SMARCA4 | Missense_Mutation | <i>SMARCA4</i> |



|       |                           |                                         |   |                 |                                                         |                   |               |             |
|-------|---------------------------|-----------------------------------------|---|-----------------|---------------------------------------------------------|-------------------|---------------|-------------|
| VSCC7 | chr19:1223113-1223113     | C                                       | T | <i>STK11</i>    | NM_000455:exon8:c.C1050T:p.D350D                        | Silent            | <i>STK11</i>  |             |
| VSCC7 | chr10:114925711-114925711 | G                                       | A | <i>TCF7L2</i>   | NM_001146285:exon13:c.G1720A:p.V574I,TCF7L2             | Missense_Mutation | <i>TCF7L2</i> |             |
| VSCC7 | chr17:7577559-7577559     | G                                       | T | <i>TP53</i>     | NM_001126115:exon3:c.C326A:p.S109Y,TP53                 | Missense_Mutation | <i>TP53</i>   |             |
| VSCC7 | chr16:72830616-72830616   | C                                       | T | <i>ZFHX3</i>    | NM_001164766:exon8:c.G3223A:p.G1075S,ZFHX3              | Missense_Mutation | <i>ZFHX3</i>  | COSM1616816 |
| VSCC7 | chr11:95825372-95825374   | TGT                                     | - | <i>MAML2</i>    | NM_032427:exon2:c.1821_1823del:p.607_608del             | In_Frame_Deletion | <i>MAML2</i>  | COSM5915171 |
| VSCC7 | chr1:209605637-209605648  | AGCAGCAGCAGC                            | - | <i>MIR205HG</i> | NM_001104548:exon4:c.252_263del:p.84_88del              | In_Frame_Deletion |               | COSM3767318 |
| VSCC7 | chr8:103573011-103573037  | TGCAACCCC<br>TGCAACCCC<br>TGCAACCC<br>G | - | <i>ODF1</i>     | NM_024410:exon2:c.652_678del:p.218_226del               | In_Frame_Deletion |               |             |
| VSCC7 | chr9:79318376-79318390    | GTGACAGC<br>CTGCAAC                     | - | <i>PRUNE2</i>   | NM_001308047:exon9:c.8139_8153del:p.2713_2718del,PRUNE2 | In_Frame_Deletion |               |             |
| VSCC7 | chr17:76798549-76798554   | TTTTTC                                  | - | <i>USP36</i>    | NM_025090:exon17:c.2874_2879del:p.958_960del            | In_Frame_Deletion |               |             |
| VSCC8 | chr5:112179816-112179816  | C                                       | G | <i>APC</i>      | NM_001127511:exon14:c.C8471G:p.S2824C,APC               | Missense_Mutation | <i>APC</i>    |             |
| VSCC8 | chr8:42865517-42865517    | G                                       | A | <i>HOOK3</i>    | NM_032410:exon19:c.G1808A:p.R603Q                       | Missense_Mutation | <i>HOOK3</i>  |             |
| VSCC8 | chr7:151860394-151860394  | C                                       | G | <i>KMT2C</i>    | NM_170606:exon43:c.G10268C:p.R3423T                     | Missense_Mutation | <i>KMT2C</i>  |             |
| VSCC8 | chr7:151877851-151877851  | G                                       | A | <i>KMT2C</i>    | NM_170606:exon36:c.C7094T:p.T2365I                      | Missense_Mutation | <i>KMT2C</i>  | COSM3605771 |
| VSCC8 | chr18:56414994-56414994   | A                                       | T | <i>MALT1</i>    | NM_173844:exon16:c.A2362T:p.S788C,MALT1                 | Missense_Mutation | <i>MALT1</i>  |             |
| VSCC8 | chr11:95825644-95825644   | G                                       | A | <i>MAML2</i>    | NM_032427:exon2:c.C1551T:p.A517A                        | Silent            | <i>MAML2</i>  |             |
| VSCC8 | chr1:11561190-11561190    | G                                       | A | <i>PTCHD2</i>   | NM_020780:exon2:c.G141A:p.R47R                          | Silent            |               |             |
| VSCC8 | chr1:14105798-14105798    | G                                       | A | <i>PRDM2</i>    | NM_001007257:exon3:c.G905A:p.R302H,PRDM2                | Missense_Mutation |               |             |

|       |                          |   |   |                 |                                             |                   |             |
|-------|--------------------------|---|---|-----------------|---------------------------------------------|-------------------|-------------|
| VSCC8 | chr1:17668535-17668535   | C | T | <i>PADI4</i>    | NM_012387:exon7:c.C750T:p.Y250Y             | Silent            | COSM4168696 |
| VSCC8 | chr1:21890624-21890624   | C | A | <i>ALPL</i>     | NM_001177520:exon4:c.C332A:p.S111X,ALPL     | Nonsense_Mutation |             |
| VSCC8 | chr1:21890625-21890625   | A | G | <i>ALPL</i>     | NM_001177520:exon4:c.A333G:p.S111S,ALPL     | Silent            |             |
| VSCC8 | chr1:23234493-23234493   | G | T | <i>EPHB2</i>    | NM_001309192:exon10:c.G2010T:p.R670R,EPHB2  | Silent            |             |
| VSCC8 | chr1:26665790-26665790   | G | A | <i>AIM1L</i>    | NM_001039775:exon6:c.C3335T;p.S1112F        | Missense_Mutation |             |
| VSCC8 | chr1:45475672-45475672   | C | T | <i>HECTD3</i>   | NM_024602:exon4:c.G745A:p.V249I             | Missense_Mutation | COSM1382731 |
| VSCC8 | chr1:64120102-64120102   | G | A | <i>PGM1</i>     | NM_001172818:exon10:c.G1618A:p.E540K,PGM1   | Missense_Mutation |             |
| VSCC8 | chr1:66102326-66102326   | G | A | <i>LEPR</i>     | NM_002303:exon20:c.G3126A:p.Q1042Q          | Silent            | COSM3610248 |
| VSCC8 | chr1:67301445-67301445   | A | G | <i>WDR78</i>    | NM_024763:exon11:c.T1597C:p.Y533H           | Missense_Mutation |             |
| VSCC8 | chr1:74648272-74648272   | T | C | <i>LRR1Q3</i>   | NM_001105659:exon3:c.A523G:p.K175E          | Missense_Mutation |             |
| VSCC8 | chr1:87045902-87045902   | A | T | <i>CLCA4</i>    | NM_012128:exon14:c.A2634T:p.T878T           | Silent            |             |
| VSCC8 | chr1:152191580-152191580 | C | T | <i>HRNR</i>     | NM_001009931:exon3:c.G2525A;p.G842E         | Missense_Mutation | COSM3619928 |
| VSCC8 | chr1:174418135-174418135 | C | T | <i>GPR52</i>    | NM_005684:exon1:c.C886T:p.P296S             | Missense_Mutation |             |
| VSCC8 | chr1:196227495-196227495 | T | G | <i>KCNT2</i>    | NM_001287819:exon25:c.A2968C:p.S990R,KCNT2  | Missense_Mutation |             |
| VSCC8 | chr1:203024616-203024616 | G | A | <i>PPFIA4</i>   | NM_001304331:exon16:c.G1886A:p.R629H,PPFIA4 | Missense_Mutation |             |
| VSCC8 | chr1:205035618-205035618 | C | T | <i>CNTN2</i>    | NM_005076:exon15:c.C1866T:p.T622T           | Silent            |             |
| VSCC8 | chr1:228463612-228463612 | C | T | <i>OBSCN</i>    | NM_001098623:exon21:c.C6105T:p.I2035I,OBSCN | Silent            |             |
| VSCC8 | chr1:233489599-233489599 | C | T | <i>KIAA1804</i> | NM_032435:exon3:c.C1033T:p.R345W            | Missense_Mutation | COSM3860492 |

|       |                          |   |   |                |                                            |                   |             |
|-------|--------------------------|---|---|----------------|--------------------------------------------|-------------------|-------------|
| VSCC8 | chr1:241519041-241519041 | G | T | <i>RGS7</i>    | NM_001282773:exon2:c.C36A:p. N12K,RGS7     | Missense_Mutation |             |
| VSCC8 | chr2:233223-233223       | C | T | <i>SH3YL1</i>  | NM_001159597:exon6:c.G411A:p.L137L,SH3YL1  | Silent            |             |
| VSCC8 | chr2:31573034-31573034   | C | T | <i>XDH</i>     | NM_000379:exon25:c.G2687A:p. R896Q         | Missense_Mutation |             |
| VSCC8 | chr2:37215892-37215892   | T | G | <i>HEATR5B</i> | NM_019024:exon35:c.A5808C:p. K1936N        | Missense_Mutation |             |
| VSCC8 | chr2:74757524-74757524   | G | A | <i>HTRA2</i>   | NM_013247:exon1:c.G391A:p.V 131I,HTRA2     | Missense_Mutation | COSM4675987 |
| VSCC8 | chr2:118696670-118696670 | C | T | <i>CCDC93</i>  | NM_019044:exon20:c.G1540A:p. E514K         | Missense_Mutation |             |
| VSCC8 | chr2:138320871-138320871 | C | A | <i>THSD7B</i>  | NM_001316349:exon16:c.C3219 A:p.N1073K     | Missense_Mutation |             |
| VSCC8 | chr2:143742703-143742703 | C | G | <i>KYNU</i>    | NM_001032998:exon9:c.C780G:p.L260L,KYNU    | Silent            | COSM4703954 |
| VSCC8 | chr2:186667948-186667948 | G | C | <i>FSIP2</i>   | NM_173651:exon17:c.G14182C:p. V4728L       | Missense_Mutation |             |
| VSCC8 | chr2:197183532-197183532 | G | A | <i>HECW2</i>   | NM_001304840:exon7:c.C1014T :p.A338A,HECW2 | Silent            | COSM1488208 |
| VSCC8 | chr2:231050727-231050727 | C | T | <i>SP110</i>   | NM_004509:exon11:c.G1262A:p. R421Q,SP110   | Missense_Mutation |             |
| VSCC8 | chr2:242681962-242681962 | C | T | <i>D2HGDH</i>  | NM_001287249:exon3:c.C61T:p. R21W,D2HGDH   | Missense_Mutation |             |
| VSCC8 | chr3:402091-402091       | C | T | <i>CHL1</i>    | NM_001253388:exon10:c.C1290 T:p.A430A,CHL1 | Silent            |             |
| VSCC8 | chr3:112999884-112999884 | A | G | <i>BOC</i>     | NM_001301861:exon15:c.A2318 G:p.K773R,BOC  | Missense_Mutation |             |
| VSCC8 | chr3:123383038-123383038 | G | A | <i>MYLK</i>    | NM_053026:exon22:c.C3692T:p. A1231V,MYLK   | Missense_Mutation |             |
| VSCC8 | chr3:124352795-124352795 | G | A | <i>KALRN</i>   | NM_007064:exon3:c.G469A:p.E 157K,KALRN     | Missense_Mutation | COSM262200  |
| VSCC8 | chr3:180630486-180630486 | A | G | <i>FXR1</i>    | NM_001013438:exon1:c.A13G:p. T5A,FXR1      | Missense_Mutation |             |
| VSCC8 | chr3:184075627-184075627 | G | A | <i>CLCN2</i>   | NM_001171088:exon5:c.C501T:p.I167I,CLCN2   | Silent            |             |

|       |                          |   |   |                 |                                            |                   |             |
|-------|--------------------------|---|---|-----------------|--------------------------------------------|-------------------|-------------|
| VSCC8 | chr3:189705389-189705389 | A | G | <i>P3H2</i>     | NM_001134418:exon5:c.T482C:p.V161A,P3H2    | Missense_Mutation |             |
| VSCC8 | chr4:3446064-3446064     | G | C | <i>HGFAC</i>    | NM_001297439:exon6:c.G625C:p.E209Q,HGFAC   | Missense_Mutation |             |
| VSCC8 | chr4:6288864-6288864     | G | A | <i>WFS1</i>     | NM_001145853:exon3:c.G277A:p.E93K,WFS1     | Missense_Mutation |             |
| VSCC8 | chr4:8376724-8376724     | G | A | <i>ACOX3</i>    | NM_001101667:exon15:c.C1809T:p.H603H,ACOX3 | Silent            |             |
| VSCC8 | chr4:48490889-48490889   | A | G | <i>SLC10A4</i>  | NM_152679:exon3:c.A1247G:p.D416G           | Missense_Mutation |             |
| VSCC8 | chr4:74903826-74903826   | C | T | <i>CXCL3</i>    | NM_002090:exon3:c.G292A:p.E98K             | Missense_Mutation | COSM2868963 |
| VSCC8 | chr4:138450837-138450837 | G | C | <i>PCDH18</i>   | NM_001300828:exon1:c.C2406G:p.L802L,PCDH18 | Silent            |             |
| VSCC8 | chr4:156825192-156825192 | G | A | <i>TDO2</i>     | NM_005651:exon2:c.G58A:p.V20I              | Missense_Mutation |             |
| VSCC8 | chr4:166261451-166261451 | G | A | <i>MSMO1</i>    | NM_001017369:exon4:c.G217A:p.V73M,MSMO1    | Missense_Mutation |             |
| VSCC8 | chr5:7868091-7868091     | C | G | <i>FASTKD3</i>  | NM_024091:exon2:c.G106C:p.V36L             | Missense_Mutation |             |
| VSCC8 | chr5:32090266-32090266   | C | T | <i>PDZD2</i>    | NM_178140:exon19:c.C6712T:p.H2238Y         | Missense_Mutation |             |
| VSCC8 | chr5:36170474-36170474   | C | T | <i>SKP2</i>     | NM_001243120:exon4:c.C58T:p.R20X,SKP2      | Nonsense_Mutation |             |
| VSCC8 | chr5:41154034-41154034   | C | G | <i>C6</i>       | NM_000065:exon15:c.G2168C:p.R723T,C6       | Missense_Mutation | COSM5955422 |
| VSCC8 | chr5:42810811-42810811   | T | C | <i>SEPP1</i>    | UNKNOWN                                    | unknown           |             |
| VSCC8 | chr5:74675279-74675279   | T | G | <i>COL4A3BP</i> | NM_031361:exon16:c.A1689C:p.A563A,COL4A3BP | Silent            |             |
| VSCC8 | chr5:140262340-140262340 | G | T | <i>PCDHA13</i>  | NM_018904:exon1:c.G487T:p.G163X,PCDHA13    | Nonsense_Mutation |             |
| VSCC8 | chr5:140263676-140263676 | C | T | <i>PCDHA13</i>  | NM_018904:exon1:c.C1823T:p.S608L,PCDHA13   | Missense_Mutation |             |
| VSCC8 | chr5:140735621-140735621 | G | C | <i>PCDHGA4</i>  | NM_018917:exon1:c.G947C:p.R316T,PCDHGA4    | Missense_Mutation |             |
| VSCC8 | chr5:147781557-147781557 | C | T | <i>FBXO38</i>   | NM_001271723:exon4:c.C275T:p.A92V,FBXO38   | Missense_Mutation |             |

|       |                          |   |   |                |                                           |                   |             |
|-------|--------------------------|---|---|----------------|-------------------------------------------|-------------------|-------------|
| VSCC8 | chr5:177031365-177031365 | C | T | <i>B4GALT7</i> | NM_007255:exon2:c.C236T:p.P79L            | Missense_Mutation |             |
| VSCC8 | chr6:11778902-11778902   | C | T | <i>ADTRP</i>   | NM_001143948:exon1:c.G91A:p.E31K,ADTRP    | Missense_Mutation |             |
| VSCC8 | chr6:49485148-49485148   | G | C | <i>GLYATL3</i> | NM_001010904:exon4:c.G192C:p.E64D         | Missense_Mutation |             |
| VSCC8 | chr6:85473811-85473811   | T | C | <i>TBX18</i>   | NM_001080508:exon1:c.A89G:p.K30R          | Missense_Mutation |             |
| VSCC8 | chr6:116265559-116265559 | G | C | <i>FRK</i>     | NM_002031:exon6:c.C988G:p.Q330E           | Missense_Mutation | COSM3927658 |
| VSCC8 | chr6:144898276-144898276 | C | T | <i>UTRN</i>    | NM_007124:exon50:c.C7331T:p.T2444M        | Missense_Mutation |             |
| VSCC8 | chr6:152779934-152779934 | C | G | <i>SYNE1</i>   | NM_033071:exon22:c.G2547C:p.E849D,SYNE1   | Missense_Mutation |             |
| VSCC8 | chr6:169051410-169051410 | G | A | <i>SMOC2</i>   | NM_001166412:exon10:c.G957A:p.A319A,SMOC2 | Silent            |             |
| VSCC8 | chr7:32209494-32209494   | G | A | <i>PDE1C</i>   | NM_001191058:exon3:c.C211T:p.P71S         | Missense_Mutation |             |
| VSCC8 | chr7:73122965-73122965   | C | T | <i>STX1A</i>   | NM_001165903:exon3:c.G162A:p.V54V,STX1A   | Silent            |             |
| VSCC8 | chr7:82579971-82579971   | C | T | <i>PCLO</i>    | NM_014510:exon6:c.G9933A:p.K3311K,PCLO    | Silent            |             |
| VSCC8 | chr7:88963152-88963152   | A | C | <i>ZNF804B</i> | NM_181646:exon4:c.A856C:p.S286R           | Missense_Mutation |             |
| VSCC8 | chr7:99260461-99260461   | C | T | <i>CYP3A5</i>  | NM_000777:exon9:c.G843A:p.S281S,CYP3A5    | Silent            |             |
| VSCC8 | chr7:100017341-100017341 | T | C | <i>ZCWPW1</i>  | NM_001258008:exon4:c.A194G:p.E65G,ZCWPW1  | Missense_Mutation |             |
| VSCC8 | chr7:100275250-100275250 | G | A | <i>GNB2</i>    | NM_005273:exon6:c.G397A:p.V133I           | Missense_Mutation |             |
| VSCC8 | chr7:100684780-100684780 | C | A | <i>MUC17</i>   | NM_001040105:exon3:c.C10083A:p.S3361S     | Silent            |             |
| VSCC8 | chr7:107415289-107415289 | C | T | <i>SLC26A3</i> | NM_000111:exon16:c.G1706A:p.R569H         | Missense_Mutation |             |
| VSCC8 | chr7:127670274-127670274 | G | A | <i>LRRC4</i>   | NM_022143:exon2:c.C420T:p.S140S           | Silent            |             |

|       |                          |   |   |                |                                             |                   |             |
|-------|--------------------------|---|---|----------------|---------------------------------------------|-------------------|-------------|
| VSCC8 | chr7:150325151-150325151 | C | T | <i>GIMAP6</i>  | NM_001244072:exon3:c.G745A:p.E249K,GIMAP6   | Missense_Mutation |             |
| VSCC8 | chr7:154755390-154755390 | C | T | <i>PAXIP1</i>  | NM_007349:exon9:c.G1980A:p.A660A            | Silent            |             |
| VSCC8 | chr7:156754893-156754893 | C | T | <i>NOM1</i>    | NM_138400:exon5:c.C1681T:p.R561C            | Missense_Mutation | COSM4724231 |
| VSCC8 | chr8:2796232-2796232     | C | A | <i>CSMD1</i>   | NM_033225:exon70:c.G10570T:p.G3524W         | Missense_Mutation |             |
| VSCC8 | chr8:77776647-77776647   | C | T | <i>ZFHX4</i>   | NM_024721:exon11:c.C10697T:p.T3566I         | Missense_Mutation | COSM468330  |
| VSCC8 | chr8:87655980-87655980   | C | T | <i>CNGB3</i>   | NM_019098:exon10:c.G1177A:p.E393K           | Missense_Mutation |             |
| VSCC8 | chr8:99440651-99440651   | C | T | <i>KCNS2</i>   | NM_020697:exon2:c.C444T:p.F148F             | Silent            |             |
| VSCC8 | chr8:103846475-103846475 | G | A | <i>AZIN1</i>   | NM_001301668:exon8:c.C683T:p.T228M,AZIN1    | Missense_Mutation |             |
| VSCC8 | chr8:113299352-113299352 | G | A | <i>CSMD3</i>   | NM_052900:exon56:c.C8765T:p.S2922L,CSMD3    | Missense_Mutation |             |
| VSCC8 | chr8:139151301-139151301 | G | A | <i>FAM135B</i> | NM_015912:exon18:c.C3829T:p.L1277L          | Silent            |             |
| VSCC8 | chr8:144940380-144940380 | C | T | <i>EPPK1</i>   | NM_031308:exon2:c.G7042A:p.V2348I           | Missense_Mutation |             |
| VSCC8 | chr8:144992486-144992486 | C | T | <i>PLEC</i>    | NM_201378:exon32:c.G11461A:p.D3821N,PLEC    | Missense_Mutation | COSM3811214 |
| VSCC8 | chr8:145583720-145583720 | C | T | <i>SLC52A2</i> | NM_001253815:exon3:c.C568T:p.R190C,SLC52A2  | Missense_Mutation |             |
| VSCC8 | chr8:145689863-145689863 | G | A | <i>CYHR1</i>   | NM_138496:exon2:c.C226T:p.L76L,CYHR1        | Silent            |             |
| VSCC8 | chr9:428459-428459       | C | T | <i>DOCK8</i>   | NM_001190458:exon33:c.C4136T:p.T1379I,DOCK8 | Missense_Mutation |             |
| VSCC8 | chr9:2161727-2161727     | A | G | <i>SMARCA2</i> | NM_001289398:exon2:c.A51G:p.V17V,SMARCA2    | Silent            | COSM3954346 |
| VSCC8 | chr9:33464143-33464143   | C | G | <i>NOL6</i>    | NM_022917:exon22:c.G2796C:p.E932D           | Missense_Mutation |             |
| VSCC8 | chr9:82339997-82339997   | G | A | <i>TLE4</i>    | NM_001282753:exon18:c.G2053A:p.D685N,TLE4   | Missense_Mutation |             |

|       |                           |   |   |                 |                                              |                   |             |
|-------|---------------------------|---|---|-----------------|----------------------------------------------|-------------------|-------------|
| VSCC8 | chr9:115030357-115030357  | A | C | <i>PTBP3</i>    | NM_001244896:exon3:c.T122G:p.L41R,PTBP3      | Missense_Mutation |             |
| VSCC8 | chr9:124528883-124528883  | G | A | <i>DAB2IP</i>   | NM_138709:exon7:c.G1199A:p.R400H,DAB2IP      | Missense_Mutation |             |
| VSCC8 | chr9:130580435-130580435  | C | T | <i>ENG</i>      | NM_000118:exon12:c.G1650A:p.T550T,ENG        | Silent            |             |
| VSCC8 | chr9:131741541-131741541  | G | T | <i>NUP188</i>   | NM_015354:exon13:c.G1204T:p.D402Y            | Missense_Mutation |             |
| VSCC8 | chr9:137593035-137593035  | C | T | <i>COL5A1</i>   | NM_000093:exon4:c.C510T:p.L170L,COL5A1       | Silent            | COSM5847740 |
| VSCC8 | chr10:13698855-13698855   | C | T | <i>FRMD4A</i>   | NM_018027:exon22:c.G2734A:p.E912K            | Missense_Mutation |             |
| VSCC8 | chr10:69954179-69954179   | G | A | <i>MYPN</i>     | NM_032578:exon14:c.G2985A:p.R995R,MYPN       | Silent            | COSM4713593 |
| VSCC8 | chr10:76868869-76868869   | G | A | <i>DUSP13</i>   | NM_001007271:exon1:c.C47T:p.T16M,DUSP13      | Missense_Mutation |             |
| VSCC8 | chr10:93256110-93256110   | A | C | <i>HECTD2</i>   | NM_182765:exon15:c.A1661C:p.D554A,HECTD2     | Missense_Mutation |             |
| VSCC8 | chr10:135373619-135373619 | C | T | <i>SYCE1</i>    | NM_001143763:exon2:c.G112A:p.E38K,SYCE1      | Missense_Mutation |             |
| VSCC8 | chr11:1017277-1017277     | A | G | <i>MUC6</i>     | NM_005961:exon31:c.T5524C:p.S1842P           | Missense_Mutation |             |
| VSCC8 | chr11:6239138-6239138     | G | A | <i>FAM160A2</i> | NM_001098794:exon9:c.C1678T:p.R560C,FAM160A2 | Missense_Mutation |             |
| VSCC8 | chr11:7059968-7059968     | A | C | <i>NLRP14</i>   | NM_176822:exon2:c.A151C:p.K51Q               | Missense_Mutation |             |
| VSCC8 | chr11:60696355-60696355   | G | T | <i>TMEM132A</i> | NM_017870:exon4:c.G789T:p.M263I,TMEM132A     | Missense_Mutation |             |
| VSCC8 | chr11:60777109-60777109   | C | T | <i>CD6</i>      | NM_001254750:exon5:c.C847T:p.R283X,CD6       | Nonsense_Mutation |             |
| VSCC8 | chr11:63486986-63486986   | G | A | <i>RTN3</i>     | NM_001265590:exon2:c.G676A:p.E226K,RTN3      | Missense_Mutation |             |
| VSCC8 | chr11:65826400-65826400   | C | T | <i>SF3B2</i>    | NM_006842:exon10:c.C1066T:p.R356W            | Missense_Mutation |             |
| VSCC8 | chr11:67267242-67267242   | C | G | <i>PITPNM1</i>  | NM_001130848:exon8:c.G1123C:p.D375H,PITPNM1  | Missense_Mutation |             |

|       |                           |   |   |                |                                                 |                   |            |
|-------|---------------------------|---|---|----------------|-------------------------------------------------|-------------------|------------|
| VSCC8 | chr11:67267253-67267253   | C | T | <i>PITPNM1</i> | NM_001130848:exon8:c.G1112A<br>:p.W371X,PITPNM1 | Nonsense_Mutation |            |
| VSCC8 | chr11:76255798-76255798   | G | A | <i>EMSY</i>    | NM_001300943:exon19:c.G3208<br>A:p.V1070M,EMSY  | Missense_Mutation |            |
| VSCC8 | chr11:102567416-102567416 | T | C | <i>MMP27</i>   | NM_022122:exon5:c.A770G:p.Q<br>257R             | Missense_Mutation | COSM163876 |
| VSCC8 | chr11:108382015-108382015 | C | T | <i>EXPH5</i>   | NM_001144765:exon3:c.G3655A<br>:p.E1219K,EXPH5  | Missense_Mutation |            |
| VSCC8 | chr11:117257978-117257978 | T | C | <i>CEP164</i>  | NM_001271933:exon14:c.T1793<br>C:p.M598T,CEP164 | Missense_Mutation |            |
| VSCC8 | chr11:121008492-121008492 | G | A | <i>TECTA</i>   | NM_005422:exon10:c.G3304A:p.<br>V1102I          | Missense_Mutation |            |
| VSCC8 | chr11:125891230-125891230 | T | C | <i>CDON</i>    | NM_001243597:exon3:c.A262G:<br>p.N88D,CDON      | Missense_Mutation | COSM356041 |
| VSCC8 | chr12:6483632-6483632     | G | A | <i>SCNN1A</i>  | NM_001159576:exon1:c.C495T:<br>p.F165F,SCNN1A   | Silent            |            |
| VSCC8 | chr12:31135514-31135514   | G | A | <i>TSPAN11</i> | NM_001080509:exon6:c.G504A:<br>p.T168T          | Silent            |            |
| VSCC8 | chr12:41422971-41422971   | G | A | <i>CNTN1</i>   | NM_175038:exon21:c.G2897A:p.<br>R966H,CNTN1     | Missense_Mutation | COSM982244 |
| VSCC8 | chr12:56030727-56030727   | T | G | <i>OR10P1</i>  | NM_206899:exon1:c.T52G:p.S18<br>A               | Missense_Mutation |            |
| VSCC8 | chr12:71286472-71286472   | T | A | <i>PTPRR</i>   | NM_002849:exon2:c.A344T:p.N<br>115I             | Missense_Mutation |            |
| VSCC8 | chr12:71966655-71966655   | G | A | <i>LGR5</i>    | NM_001277226:exon12:c.G1090<br>A:p.E364K,LGR5   | Missense_Mutation |            |
| VSCC8 | chr12:102045108-102045108 | A | C | <i>MYBPC1</i>  | NM_001254722:exon12:c.A1310<br>C:p.K437T,MYBPC1 | Missense_Mutation |            |
| VSCC8 | chr12:102313901-102313901 | C | T | <i>DRAM1</i>   | NM_018370:exon6:c.C594T:p.H<br>198H             | Silent            |            |
| VSCC8 | chr12:120541697-120541697 | C | T | <i>RAB35</i>   | NM_001167606:exon3:c.G160A:<br>p.G54R,RAB35     | Missense_Mutation |            |
| VSCC8 | chr12:120611892-120611892 | G | A | <i>GCN1</i>    | NM_006836:exon13:c.C1175T:p.<br>P392L           | Missense_Mutation |            |
| VSCC8 | chr12:121881816-121881816 | C | T | <i>KDM2B</i>   | NM_001005366:exon16:c.G2357<br>A:p.R786Q,KDM2B  | Missense_Mutation |            |



|       |                           |   |   |                |                                             |                   |              |             |
|-------|---------------------------|---|---|----------------|---------------------------------------------|-------------------|--------------|-------------|
| VSCC8 | chr12:123213973-123213973 | G | C | <i>HCARI</i>   | NM_032554:exon1:c.C914G:p.S305X             | Nonsense_Mutation |              |             |
| VSCC8 | chr12:123214329-123214329 | A | G | <i>HCARI</i>   | NM_032554:exon1:c.T558C:p.F186F             | Silent            |              |             |
| VSCC8 | chr12:124819735-124819735 | G | A | <i>NCOR2</i>   | NM_001077261:exon41:c.C6327T;p.T2109T,NCOR2 | Silent            | <i>NCOR2</i> | COSM998772  |
| VSCC8 | chr12:133350895-133350895 | C | T | <i>GOLGA3</i>  | NM_005895:exon23:c.G4155A:p.P1385P          | Silent            |              | COSM1001515 |
| VSCC8 | chr12:133780489-133780489 | C | G | <i>ZNF268</i>  | NM_001165881:exon6:c.C2217G;p.L739L,ZNF268  | Silent            |              |             |
| VSCC8 | chr12:133780573-133780573 | C | G | <i>ZNF268</i>  | NM_001165881:exon6:c.C2301G;p.L767L,ZNF268  | Silent            |              |             |
| VSCC8 | chr13:28014361-28014361   | A | G | <i>MTIF3</i>   | NM_001166261:exon3:c.T225C:p.F75F,MTIF3     | Silent            |              |             |
| VSCC8 | chr13:67801374-67801374   | A | G | <i>PCDH9</i>   | NM_020403:exon2:c.T1199C:p.I400T,PCDH9      | Missense_Mutation |              | COSM5642760 |
| VSCC8 | chr13:101910924-101910924 | T | A | <i>NALCN</i>   | NM_052867:exon11:c.A1136T:p.K379I           | Missense_Mutation |              |             |
| VSCC8 | chr14:20612317-20612317   | C | A | <i>OR4N5</i>   | NM_001004724:exon1:c.C423A:p.C141X          | Nonsense_Mutation |              |             |
| VSCC8 | chr14:24435536-24435536   | G | C | <i>DHRS4</i>   | NM_001282988:exon5:c.G474C:p.L158L,DHRS4    | Silent            |              |             |
| VSCC8 | chr14:56746483-56746483   | G | A | <i>PELI2</i>   | NM_021255:exon3:c.G297A:p.T99T              | Silent            |              |             |
| VSCC8 | chr14:90420302-90420302   | C | T | <i>EFCAB11</i> | NM_001284266:exon2:c.G119A:p.R40K,EFCAB11   | Missense_Mutation |              |             |
| VSCC8 | chr15:29398931-29398931   | C | T | <i>APBA2</i>   | NM_001130414:exon10:c.C1790T;p.S597L,APBA2  | Missense_Mutation |              |             |
| VSCC8 | chr15:33446653-33446653   | C | T | <i>FMN1</i>    | NM_001277313:exon4:c.G463A:p.G155R,FMN1     | Missense_Mutation |              |             |
| VSCC8 | chr15:66845582-66845582   | C | G | <i>LCTL</i>    | NM_001278562:exon8:c.G418C:p.E140Q,LCTL     | Missense_Mutation |              |             |
| VSCC8 | chr15:75684669-75684669   | C | T | <i>SIN3A</i>   | NM_001145357:exon15:c.G2765A;p.R922Q,SIN3A  | Missense_Mutation |              |             |
| VSCC8 | chr15:96877431-96877431   | C | G | <i>NR2F2</i>   | NM_001145155:exon2:c.C170G:p.P57R,NR2F2     | Missense_Mutation |              |             |

|       |                         |   |   |                 |                                          |                   |             |
|-------|-------------------------|---|---|-----------------|------------------------------------------|-------------------|-------------|
| VSCC8 | chr16:767154-767154     | C | T | <i>METRN</i>    | NM_024042:exon4:c.C649T:p.R217C          | Missense_Mutation |             |
| VSCC8 | chr16:2338174-2338174   | C | T | <i>ABCA3</i>    | NM_001089:exon21:c.G2857A:p.D953N        | Missense_Mutation |             |
| VSCC8 | chr16:3639369-3639369   | C | T | <i>SLX4</i>     | NM_032444:exon12:c.G4270A:p.D1424N       | Missense_Mutation | COSM4100101 |
| VSCC8 | chr16:19726124-19726124 | G | A | <i>KNOP1</i>    | NM_001012991:exon2:c.C234T:p.C78C        | Silent            |             |
| VSCC8 | chr16:20975951-20975951 | G | A | <i>DNAH3</i>    | NM_017539:exon53:c.C9255T:p.H3085H       | Silent            |             |
| VSCC8 | chr16:23080069-23080069 | C | T | <i>USP31</i>    | NM_020718:exon16:c.G3357A:p.S1119S       | Silent            |             |
| VSCC8 | chr16:28962540-28962540 | G | T | <i>NFATC2IP</i> | NM_032815:exon1:c.G208T:p.E70X           | Nonsense_Mutation |             |
| VSCC8 | chr16:29706228-29706228 | G | A | <i>QPRT</i>     | NM_014298:exon2:c.G257A:p.R86K           | Missense_Mutation |             |
| VSCC8 | chr16:30123710-30123710 | G | A | <i>GDPD3</i>    | NM_024307:exon5:c.C400T:p.R134C          | Missense_Mutation | COSM5485134 |
| VSCC8 | chr17:4701403-4701403   | C | T | <i>PSMB6</i>    | NM_001270481:exon5:c.C532T:p.R178W,PSMB6 | Missense_Mutation | COSM3997111 |
| VSCC8 | chr17:8445467-8445467   | G | A | <i>MYH10</i>    | NM_005964:exon13:c.C1533T:p.F511F,MYH10  | Silent            |             |
| VSCC8 | chr17:27834957-27834957 | G | C | <i>TAOK1</i>    | NM_020791:exon14:c.G1382C:p.R461T,TAOK1  | Missense_Mutation | COSM99651   |
| VSCC8 | chr17:29527462-29527462 | G | A | <i>NF1</i>      | NM_000267:exon9:c.G911A:p.R304Q,NF1      | Missense_Mutation | <i>NF1</i>  |
| VSCC8 | chr17:59485435-59485435 | C | T | <i>TBX2</i>     | NM_005994:exon7:c.C1707T:p.F569F         | Silent            | COSM1344640 |
| VSCC8 | chr17:64299059-64299059 | C | T | <i>PRKCA</i>    | NM_002737:exon1:c.C90T:p.N30N            | Silent            |             |
| VSCC8 | chr17:65163906-65163906 | G | A | <i>HELZ</i>     | NM_014877:exon14:c.C1437T:p.N479N        | Silent            |             |
| VSCC8 | chr17:67170869-67170869 | T | C | <i>ABCA10</i>   | NM_080282:exon25:c.A2927G:p.Y976C        | Missense_Mutation |             |
| VSCC8 | chr17:73910301-73910301 | C | A | <i>FBF1</i>     | NM_001080542:exon25:c.G2848T:p.E950X     | Nonsense_Mutation | COSM4664231 |

|       |                         |   |   |                 |                                              |                   |             |
|-------|-------------------------|---|---|-----------------|----------------------------------------------|-------------------|-------------|
| VSCC8 | chr18:12325109-12325109 | G | A | <i>TUBB6</i>    | NM_001303526:exon3:c.G210A:p.T70T,TUBB6      | Silent            |             |
| VSCC8 | chr18:21761212-21761212 | A | T | <i>OSBPL1A</i>  | NM_018030:exon5:c.T170A:p.F57Y,OSBPL1A       | Missense_Mutation | COSM3746686 |
| VSCC8 | chr19:2717754-2717754   | G | A | <i>DIRAS1</i>   | NM_145173:exon2:c.C51T:p.G17G                | Silent            |             |
| VSCC8 | chr19:4501270-4501270   | C | T | <i>HDGFRP2</i>  | NM_001001520:exon16:c.C1857T:p.H619H,HDGFRP2 | Silent            |             |
| VSCC8 | chr19:4817174-4817174   | C | T | <i>TICAM1</i>   | NM_182919:exon2:c.G1216A:p.E406K             | Missense_Mutation |             |
| VSCC8 | chr19:5598855-5598855   | C | T | <i>SAFB2</i>    | NM_014649:exon13:c.G1731A:p.S577S            | Silent            |             |
| VSCC8 | chr19:5784655-5784655   | G | A | <i>PRR22</i>    | NM_001134316:exon1:c.C17T:p.P6L              | Missense_Mutation |             |
| VSCC8 | chr19:5790117-5790117   | G | T | <i>DUS3L</i>    | NM_020175:exon2:c.C328A:p.R110R              | Silent            | COSM5427700 |
| VSCC8 | chr19:6750590-6750590   | G | A | <i>TRIP10</i>   | NM_001288963:exon13:c.G1435A:p.E479K,TRIP10  | Missense_Mutation |             |
| VSCC8 | chr19:7692140-7692140   | G | A | <i>XAB2</i>     | NM_020196:exon4:c.C511T:p.R171C              | Missense_Mutation | COSM3751212 |
| VSCC8 | chr19:9800970-9800970   | G | A | <i>ZNF812</i>   | NM_001199814:exon6:c.C1209T:p.P403P          | Silent            | COSM3751223 |
| VSCC8 | chr19:40433177-40433177 | C | A | <i>FCGBP</i>    | NM_003890:exon2:c.G1092T:p.T364T             | Silent            |             |
| VSCC8 | chr19:41248552-41248552 | G | A | <i>C19orf54</i> | NM_198476:exon6:c.C842T:p.S281F              | Missense_Mutation | COSM4144054 |
| VSCC8 | chr19:46198929-46198929 | G | C | <i>QPCTL</i>    | NM_017659:exon3:c.G586C:p.E196Q              | Missense_Mutation | COSM3790181 |
| VSCC8 | chr19:47503751-47503751 | T | G | <i>ARHGAP35</i> | NM_004491:exon6:c.T4306G:p.F1436V            | Missense_Mutation | COSM146554  |
| VSCC8 | chr19:48205291-48205291 | C | T | <i>GLTSCR1</i>  | NM_015711:exon15:c.C4302T:p.A1434A           | Silent            |             |
| VSCC8 | chr19:49699879-49699879 | C | T | <i>TRPM4</i>    | NM_017636:exon17:c.C2393T:p.S798L            | Missense_Mutation |             |
| VSCC8 | chr19:54783449-54783449 | C | A | <i>LILRB2</i>   | NM_001278404:exon4:c.G61T:p.G21X,LILRB2      | Nonsense_Mutation | COSM3747120 |

|       |                          |           |   |                 |                                                     |                   |                               |
|-------|--------------------------|-----------|---|-----------------|-----------------------------------------------------|-------------------|-------------------------------|
| VSCC8 | chr19:58117590-58117590  | G         | C | <i>ZNF530</i>   | NM_020880:exon3:c.G697C:p.D233H                     | Missense_Mutation |                               |
| VSCC8 | chr20:2464034-2464034    | C         | T | <i>ZNF343</i>   | NM_001282498:exon4:c.G1303A:p.E435K,ZNF343          | Missense_Mutation |                               |
| VSCC8 | chr20:47990005-47990005  | G         | A | <i>KCNB1</i>    | NM_004975:exon2:c.C2092T:p.R698W                    | Missense_Mutation |                               |
| VSCC8 | chr20:55208470-55208470  | C         | T | <i>TFAP2C</i>   | NM_003222:exon4:c.C648T:p.A216A                     | Silent            | COSM146639                    |
| VSCC8 | chr20:60899589-60899589  | G         | A | <i>LAMA5</i>    | NM_005560:exon42:c.C5551T:p.R1851W                  | Missense_Mutation | COSM146661                    |
| VSCC8 | chr22:18567948-18567948  | C         | T | <i>PEX26</i>    | NM_001127649:exon4:c.C738T:p.H246H,PEX26            | Silent            |                               |
| VSCC8 | chr22:25566853-25566853  | G         | A | <i>KIAA1671</i> | NM_001145206:exon5:c.G4597A:p.E1533K                | Missense_Mutation | COSM4418748                   |
| VSCC8 | chrX:18797261-18797261   | G         | A | <i>PPEF1</i>    | NM_006240:exon10:c.G692A:p.R231K,PPEF1              | Missense_Mutation | COSM1748046                   |
| VSCC8 | chrX:70465851-70465851   | G         | A | <i>ZMYM3</i>    | NM_001171162:exon16:c.C2634T:p.F878F,ZMYM3          | Silent            | COSM4764278                   |
| VSCC8 | chrX:99663420-99663420   | G         | A | <i>PCDH19</i>   | NM_001105243:exon1:c.C176T:p.S59L,PCDH19            | Missense_Mutation | COSM3750764                   |
| VSCC8 | chrX:139866459-139866459 | C         | T | <i>CDR1</i>     | NM_004065:exon1:c.G73A:p.V25I                       | Missense_Mutation | COSM3750772                   |
| VSCC8 | chr8:92998424-92998424   | T         | A | <i>RUNX1T1</i>  | NM_175636:exon7:c.A1096T:p.K366X,RUNX1T1            | Nonsense_Mutation | <i>RUNX1T1</i><br>COSM3750804 |
| VSCC8 | chr18:45368211-45368211  | G         | C | <i>SMAD2</i>    | NM_001135937:exon10:c.C1301G:p.S434X,SMAD2          | Nonsense_Mutation | <i>SMAD2</i>                  |
| VSCC8 | chr17:5042847-5042847    | C         | T | <i>USP6</i>     | NM_004505:exon14:c.C1376T:p.T459M,USP6              | Missense_Mutation | <i>USP6</i>                   |
| VSCC8 | chr3:52441233-52441237   | CCGGC     | - | <i>BAP1</i>     | NM_004656:exon7:c.533_537del:p.G178fs               | Frame_Shift_Del   | <i>BAP1</i><br>COSM3750987    |
| VSCC8 | chr11:95825375-95825383  | TGCTGCTGC | - | <i>MAML2</i>    | NM_032427:exon2:c.1812_1820del:p.604_607del         | In_Frame_Del      | <i>MAML2</i>                  |
| VSCC8 | chr17:7577594-7577595    | AC        | - | <i>TP53</i>     | NM_001126115:exon3:c.290_291del:p.C97fs,TP53        | Frame_Shift_Del   | <i>TP53</i><br>COSM3751007    |
| VSCC8 | chr2:131129929-131129934 | GACGGG    | - | <i>PTPN18</i>   | NM_001142370:exon9:c.792_797del:p.264_266del,PTPN18 | In_Frame_Del      |                               |

|       |                          |                                         |   |                   |                                                        |                   |              |             |
|-------|--------------------------|-----------------------------------------|---|-------------------|--------------------------------------------------------|-------------------|--------------|-------------|
| VSCC8 | chr8:11666219-11666224   | TCCCAC                                  | - | <i>FDFT1</i>      | NM_001287750:exon1:c.193_198del:p.65_66del             | In_Frame_Del      |              | COSM3751024 |
| VSCC8 | chr8:86129663-86129663   | -                                       | T | <i>C8orf59</i>    | NM_001099673:exon2:c.65dupA;p.N22fs,C8orf59            | Frame_Shift_Ins   |              |             |
| VSCC8 | chr8:103573011-103573037 | TGCAACCCC<br>TGCAGCCCC<br>TGCAACCC<br>G | - | <i>ODF1</i>       | NM_024410:exon2:c.652_678del;p.218_226del              | In_Frame_Del      |              | COSM3751113 |
| VSCC8 | chr9:79318376-79318390   | GTGACAGC<br>CTGCAAC                     | - | <i>PRUNE2</i>     | NM_001308047:exon9:c.8139_153del:p.2713_2718del,PRUNE2 | In_Frame_Del      |              | COSM3751114 |
| VSCC8 | chr9:140918171-140918185 | GGAGAAGG<br>AGACCAC                     | - | <i>CACNA1B</i>    | NM_000718:exon19:c.2976_30del:p.992_997del,CACNA1B     | In_Frame_Del      |              |             |
| VSCC8 | chr10:5789967-5789975    | CTGCCTCAG                               | - | <i>FAM208B</i>    | NM_017782:exon15:c.4583_451del:p.1528_1531del          | In_Frame_Del      |              | COSM3682534 |
| VSCC8 | chr14:20528449-20528467  | CATAGATTT<br>GCTCACTGA<br>C             | - | <i>OR4L1</i>      | NM_001004717:exon1:c.246_264del:p.I82fs                | Frame_Shift_Del   |              | COSM4001620 |
| VSCC8 | chr19:17397498-17397501  | TGTT                                    | - | <i>ANKLE1</i>     | NM_001278444:exon8:c.1930_1933del:p.C644fs             | Frame_Shift_Del   |              |             |
| VSCC8 | chr21:46057613-46057627  | CTGCTGTGT<br>GCCTGT                     | - | <i>KRTAP10-10</i> | NM_181688:exon1:c.279_293del;p.93_98del                | In_Frame_Del      |              | COSM148844  |
| VSCC8 | chr21:46924426-46924434  | GGCCCCC<br>A                            | - | <i>COL18A1</i>    | NM_030582:exon33:c.3364_3364del:p.G1122fs,COL18A1      | Frame_Shift_Del   |              | COSM3426483 |
| VSCC9 | chr20:31023500-31023500  | C                                       | T | <i>ASXL1</i>      | NM_015338:exon12:c.C2985T;p.H995H                      | Silent            | <i>ASXL1</i> | COSM1021658 |
| VSCC9 | chr12:6709097-6709097    | C                                       | T | <i>CHD4</i>       | NM_001297553:exon9:c.G1303A;p.E435K,CHD4               | Missense_Mutation | <i>CHD4</i>  |             |
| VSCC9 | chr19:18886551-18886551  | C                                       | T | <i>CRTC1</i>      | NM_015321:exon13:c.C1613T;p.T538M,CRTC1                | Missense_Mutation | <i>CRTC1</i> |             |
| VSCC9 | chr6:152129077-152129077 | T                                       | C | <i>ESR1</i>       | NM_000125:exon1:c.T30C;p.S10S,ESR1                     | Silent            | <i>ESR1</i>  |             |
| VSCC9 | chr4:187524435-187524435 | C                                       | T | <i>FAT1</i>       | NM_005245:exon19:c.G11245A;p.D3749N                    | Missense_Mutation | <i>FAT1</i>  | COSM4001751 |
| VSCC9 | chr11:95825374-95825374  | T                                       | C | <i>MAML2</i>      | NM_032427:exon2:c.A1821G;p.Q607Q                       | Silent            | <i>MAML2</i> |             |
| VSCC9 | chr1:1849530-1849530     | T                                       | C | <i>TMEM52</i>     | NM_178545:exon5:c.A421G;p.M141V                        | Missense_Mutation |              | COSM3746549 |

|       |                        |   |   |                |                                              |                   |             |
|-------|------------------------|---|---|----------------|----------------------------------------------|-------------------|-------------|
| VSCC9 | chr1:1849744-1849744   | G | A | <i>TMEM52</i>  | NM_178545:exon4:c.C297T:p.D99D               | Silent            |             |
| VSCC9 | chr1:3553598-3553598   | G | A | <i>WRAP73</i>  | NM_017818:exon5:c.C477T:p.Y159Y              | Silent            |             |
| VSCC9 | chr1:8716141-8716141   | C | T | <i>RERE</i>    | NM_001042681:exon2:c.G216A:p.T72T,RERE       | Silent            |             |
| VSCC9 | chr1:8716301-8716301   | C | T | <i>RERE</i>    | NM_001042681:exon2:c.G56A:p.R19Q,RERE        | Missense_Mutation |             |
| VSCC9 | chr1:17314722-17314722 | G | A | <i>ATP13A2</i> | NM_001141974:exon24:c.C2638T:p.R880C,ATP13A2 | Missense_Mutation |             |
| VSCC9 | chr1:17331257-17331257 | G | A | <i>ATP13A2</i> | NM_001141973:exon5:c.C407T:p.A136V,ATP13A2   | Missense_Mutation |             |
| VSCC9 | chr1:18149510-18149510 | G | T | <i>ACTL8</i>   | NM_030812:exon2:c.G7T:p.A3S                  | Missense_Mutation |             |
| VSCC9 | chr1:26885356-26885356 | C | T | <i>RPS6KA1</i> | NM_001006665:exon13:c.C1170T:p.F390F,RPS6KA1 | Silent            |             |
| VSCC9 | chr1:27627916-27627916 | G | A | <i>WDTC1</i>   | NM_001276252:exon13:c.G1432A:p.D478N,WDTC1   | Missense_Mutation |             |
| VSCC9 | chr1:27660758-27660758 | C | T | <i>TMEM222</i> | NM_032125:exon5:c.C525T:p.Y175Y              | Silent            | COSM1404680 |
| VSCC9 | chr1:27720665-27720665 | C | T | <i>GPR3</i>    | NM_005281:exon2:c.C363T:p.T121T              | Silent            | COSM4001500 |
| VSCC9 | chr1:36556867-36556867 | C | T | <i>ADPRHL2</i> | NM_017825:exon2:c.C234T:p.D78D               | Silent            | COSM5829416 |
| VSCC9 | chr1:39340607-39340607 | A | G | <i>GJA9</i>    | NM_030772:exon2:c.T1164C:p.R388R             | Silent            | COSM149070  |
| VSCC9 | chr1:43649508-43649508 | A | G | <i>CFAP57</i>  | NM_001167965:exon4:c.A721G:p.N241D,CFAP57    | Missense_Mutation | COSM3933538 |
| VSCC9 | chr1:44035352-44035352 | C | T | <i>PTPRF</i>   | NM_002840:exon6:c.C471T:p.A157A,PTPRF        | Silent            | COSM4001507 |
| VSCC9 | chr1:47138722-47138722 | G | A | <i>TEX38</i>   | NM_001145474:exon2:c.G215A:p.R72Q,TEX38      | Missense_Mutation |             |
| VSCC9 | chr1:47614434-47614434 | C | T | <i>CYP4A22</i> | NM_001010969:exon12:c.C1525T:p.L509F         | Missense_Mutation |             |
| VSCC9 | chr1:62263049-62263049 | C | T | <i>INADL</i>   | NM_176877:exon11:c.C1351T:p.R451X            | Nonsense_Mutation | COSM4419545 |

|       |                          |   |   |                |                                            |                   |             |
|-------|--------------------------|---|---|----------------|--------------------------------------------|-------------------|-------------|
| VSCC9 | chr1:89426902-89426902   | G | A | <i>CCBL2</i>   | NM_001008662:exon7:c.C633T:p.S211S,CCBL2   | Silent            |             |
| VSCC9 | chr1:94512635-94512635   | G | A | <i>ABCA4</i>   | NM_000350:exon19:c.C2758T:p.R920C          | Missense_Mutation | COSM1423524 |
| VSCC9 | chr1:94965138-94965138   | G | A | <i>ABCD3</i>   | NM_002858:exon20:c.G1708A:p.V570I          | Missense_Mutation |             |
| VSCC9 | chr1:97272456-97272456   | A | G | <i>PTBP2</i>   | NM_001300990:exon10:c.A957G:p.L319L,PTBP2  | Silent            | COSM4002824 |
| VSCC9 | chr1:110737359-110737359 | C | T | <i>SLC6A17</i> | NM_001010898:exon9:c.C1458T:p.I486I        | Silent            | COSM2950580 |
| VSCC9 | chr1:117663725-117663725 | C | T | <i>TRIM45</i>  | NM_001145635:exon1:c.G99A:p.L33L,TRIM45    | Silent            | COSM4005262 |
| VSCC9 | chr1:145601791-145601791 | C | T | <i>POLR3C</i>  | NM_001303456:exon6:c.G779A:p.R260H,POLR3C  | Missense_Mutation | COSM4115802 |
| VSCC9 | chr1:156347834-156347834 | T | A | <i>RHBG</i>    | NM_020407:exon3:c.T428A:p.V143D,RHBG       | Missense_Mutation | COSM3760030 |
| VSCC9 | chr1:159505297-159505297 | C | T | <i>OR10J5</i>  | NM_001004469:exon1:c.G501A:p.P167P         | Silent            |             |
| VSCC9 | chr1:172558305-172558305 | G | A | <i>SUCO</i>    | NM_001282751:exon16:c.G375A:p.T125T,SUCO   | Silent            |             |
| VSCC9 | chr1:183072590-183072590 | T | C | <i>LAMC1</i>   | NM_002293:exon2:c.T546C:p.C182C            | Silent            |             |
| VSCC9 | chr1:197059424-197059424 | C | T | <i>ASPM</i>    | NM_001206846:exon23:c.G4976A:p.R1659Q,ASPM | Missense_Mutation | COSM1471622 |
| VSCC9 | chr1:197169213-197169213 | C | T | <i>ZBTB41</i>  | NM_194314:exon1:c.G391A:p.V131I            | Missense_Mutation | COSM4002460 |
| VSCC9 | chr1:201973565-201973565 | G | A | <i>RNPEP</i>   | NM_020216:exon10:c.G1735A:p.V579I          | Missense_Mutation |             |
| VSCC9 | chr1:202304868-202304868 | T | C | <i>UBE2T</i>   | NM_014176:exon2:c.A15G:p.S5S               | Silent            | COSM128534  |
| VSCC9 | chr1:205240251-205240251 | C | T | <i>TMCC2</i>   | NM_001297611:exon3:c.C1011T:p.Y337Y,TMCC2  | Silent            | COSM3002274 |
| VSCC9 | chr1:212273729-212273729 | C | T | <i>DTL</i>     | NM_001286229:exon12:c.C584T:p.T195M,DTL    | Missense_Mutation | COSM3003506 |
| VSCC9 | chr1:225607437-225607437 | C | T | <i>LBR</i>     | NM_002296:exon4:c.G430A:p.A144T,LBR        | Missense_Mutation | COSM149515  |

|       |                          |   |   |                |                                           |                   |             |
|-------|--------------------------|---|---|----------------|-------------------------------------------|-------------------|-------------|
| VSCC9 | chr1:230914729-230914729 | A | C | <i>CAPN9</i>   | NM_016452:exon8:c.A886C:p.K296Q,CAPN9     | Missense_Mutation | COSM3759906 |
| VSCC9 | chr1:233190140-233190140 | G | A | <i>PCNXL2</i>  | NM_014801:exon25:c.C4225T:p.R1409C        | Missense_Mutation |             |
| VSCC9 | chr1:234546245-234546245 | C | T | <i>TARBP1</i>  | NM_005646:exon23:c.G3738A:p.T1246T        | Silent            |             |
| VSCC9 | chr1:236187412-236187412 | C | T | <i>NID1</i>    | NM_002508:exon9:c.G2086A:p.E696K          | Missense_Mutation |             |
| VSCC9 | chr1:236746443-236746443 | C | T | <i>HEATR1</i>  | NM_018072:exon18:c.G2295A:p.V765V         | Silent            |             |
| VSCC9 | chr1:237947649-237947649 | G | A | <i>RYR2</i>    | NM_001035:exon90:c.G12637A:p.E4213K       | Missense_Mutation | COSM4597192 |
| VSCC9 | chr1:248551560-248551560 | C | T | <i>OR2T6</i>   | NM_001005471:exon1:c.C651T:p.S217S        | Silent            |             |
| VSCC9 | chr1:248551636-248551636 | T | G | <i>OR2T6</i>   | NM_001005471:exon1:c.T727G:p.S243A        | Missense_Mutation | COSM4416001 |
| VSCC9 | chr2:7154687-7154687     | G | A | <i>RNF144A</i> | NM_014746:exon4:c.G238A:p.E80K            | Missense_Mutation |             |
| VSCC9 | chr2:21252534-21252534   | G | A | <i>APOB</i>    | NM_000384:exon12:c.C1594T:p.R532W         | Missense_Mutation |             |
| VSCC9 | chr2:25359422-25359422   | G | A | <i>EFR3B</i>   | NM_014971:exon14:c.G1515A:p.L505L         | Silent            |             |
| VSCC9 | chr2:27016141-27016141   | C | T | <i>CENPA</i>   | NM_001042426:exon3:c.C339T:p.L113L,CENPA  | Silent            | COSM5774397 |
| VSCC9 | chr2:37579971-37579971   | C | T | <i>QPCT</i>    | NM_012413:exon2:c.C160T:p.R54W            | Missense_Mutation | COSM1431106 |
| VSCC9 | chr2:47135055-47135055   | G | A | <i>MCFD2</i>   | NM_001171509:exon2:c.C47T:p.S16L,MCFD2    | Missense_Mutation |             |
| VSCC9 | chr2:54853220-54853220   | G | A | <i>SPTBN1</i>  | NM_178313:exon11:c.G1454A:p.R485H,SPTBN1  | Missense_Mutation |             |
| VSCC9 | chr2:63058283-63058283   | T | A | <i>EHBP1</i>   | NM_001142614:exon6:c.T624A:p.A208A,EHBP1  | Silent            | COSM4002866 |
| VSCC9 | chr2:65540937-65540937   | C | T | <i>SPRED2</i>  | NM_001128210:exon6:c.G946A:p.E316K,SPRED2 | Missense_Mutation | COSM4002912 |
| VSCC9 | chr2:69093312-69093312   | A | G | <i>BMP10</i>   | NM_014482:exon2:c.T726C:p.D242D           | Silent            | COSM3760359 |



|       |                          |   |   |                |                                            |                   |             |
|-------|--------------------------|---|---|----------------|--------------------------------------------|-------------------|-------------|
| VSCC9 | chr2:74761539-74761539   | T | A | <i>LOXL3</i>   | NM_001289165:exon7:c.A760T:p.I254F,LOXL3   | Missense_Mutation |             |
| VSCC9 | chr2:74779551-74779551   | C | T | <i>LOXL3</i>   | NM_001289164:exon2:c.G211A:p.D71N,LOXL3    | Missense_Mutation | COSM3760449 |
| VSCC9 | chr2:85570849-85570849   | C | T | <i>RETSAT</i>  | NM_017750:exon10:c.G1606A:p.G536R          | Missense_Mutation |             |
| VSCC9 | chr2:113067593-113067593 | T | C | <i>ZC3H6</i>   | NM_198581:exon4:c.T468C:p.F156F            | Silent            |             |
| VSCC9 | chr2:120194848-120194848 | C | T | <i>TMEM37</i>  | NM_183240:exon2:c.C405T:p.F135F            | Silent            | COSM3760494 |
| VSCC9 | chr2:155555484-155555484 | G | A | <i>KCNJ3</i>   | NM_001260508:exon1:c.G197A:p.R66H,KCNJ3    | Missense_Mutation |             |
| VSCC9 | chr2:171655354-171655354 | G | A | <i>ERICH2</i>  | NM_001289947:exon5:c.G421A:p.D141N,ERICH2  | Missense_Mutation | COSM4445006 |
| VSCC9 | chr2:179395559-179395559 | C | T | <i>TTN</i>     | NM_003319:exon186:c.G78588A:p.P26196P,TTN  | Silent            |             |
| VSCC9 | chr2:179400895-179400895 | C | T | <i>TTN</i>     | NM_003319:exon185:c.G73384A:p.V24462I,TTN  | Missense_Mutation | COSM5000715 |
| VSCC9 | chr2:180311444-180311444 | T | C | <i>ZNF385B</i> | NM_001113397:exon5:c.A496G:p.S166G,ZNF385B | Missense_Mutation | COSM231752  |
| VSCC9 | chr2:204325990-204325990 | C | T | <i>RAPH1</i>   | NM_213589:exon6:c.G952A:p.V318I,RAPH1      | Missense_Mutation |             |
| VSCC9 | chr2:218713282-218713282 | G | A | <i>TNS1</i>    | NM_001308022:exon16:c.C1583T:p.T528I,TNS1  | Missense_Mutation | COSM1067322 |
| VSCC9 | chr2:219555262-219555262 | G | A | <i>STK36</i>   | NM_001243313:exon14:c.G1748A:p.R583Q,STK36 | Missense_Mutation |             |
| VSCC9 | chr2:219903723-219903723 | C | T | <i>CFAP65</i>  | NM_194302:exon3:c.G48A:p.V16V              | Silent            | COSM1069532 |
| VSCC9 | chr2:220037666-220037666 | A | G | <i>CNPPD1</i>  | NM_015680:exon8:c.T875C:p.L292P            | Missense_Mutation | COSM150019  |
| VSCC9 | chr2:220037756-220037756 | A | G | <i>CNPPD1</i>  | NM_015680:exon8:c.T785C:p.I262T            | Missense_Mutation |             |
| VSCC9 | chr2:220193917-220193917 | C | T | <i>RESP18</i>  | NM_001007089:exon5:c.G523A:p.A175T         | Missense_Mutation | COSM149857  |
| VSCC9 | chr2:239355106-239355106 | C | T | <i>ASB1</i>    | NM_001040445:exon5:c.C962T:p.S321L         | Missense_Mutation |             |

|       |                          |   |   |                |                                             |                   |             |
|-------|--------------------------|---|---|----------------|---------------------------------------------|-------------------|-------------|
| VSCC9 | chr2:241713646-241713646 | A | G | <i>KIF1A</i>   | NM_004321:exon11:c.T991C:p.L331L,KIF1A      | Silent            | COSM3760863 |
| VSCC9 | chr2:242437746-242437746 | G | A | <i>STK25</i>   | NM_001271978:exon8:c.C936T:p.D312D,STK25    | Silent            | COSM3760893 |
| VSCC9 | chr3:4735184-4735184     | C | T | <i>ITPR1</i>   | NM_001168272:exon32:c.C3995T:p.S1332L,ITPR1 | Missense_Mutation |             |
| VSCC9 | chr3:7620789-7620789     | T | C | <i>GRM7</i>    | NM_000844:exon8:c.T2196C:p.Y732Y,GRM7       | Silent            |             |
| VSCC9 | chr3:7620828-7620828     | G | A | <i>GRM7</i>    | NM_000844:exon8:c.G2235A:p.G745G,GRM7       | Silent            | COSM3760920 |
| VSCC9 | chr3:9831497-9831497     | G | A | <i>TADA3</i>   | NM_001278270:exon3:c.C358T:p.R120W,TADA3    | Missense_Mutation | COSM3760921 |
| VSCC9 | chr3:13395475-13395475   | G | C | <i>NUP210</i>  | NM_024923:exon17:c.C2461G:p.P821A           | Missense_Mutation |             |
| VSCC9 | chr3:18427971-18427971   | C | T | <i>SATB1</i>   | NM_001131010:exon8:c.G1339A:p.E447K,SATB1   | Missense_Mutation |             |
| VSCC9 | chr3:19975215-19975215   | C | A | <i>EFHB</i>    | NM_144715:exon1:c.G296T:p.G99V              | Missense_Mutation | COSM150002  |
| VSCC9 | chr3:21462739-21462739   | G | A | <i>ZNF385D</i> | NM_024697:exon8:c.C1155T:p.T385T            | Silent            |             |
| VSCC9 | chr3:51929156-51929156   | C | T | <i>IQCF1</i>   | NM_152397:exon4:c.G368A:p.R123Q             | Missense_Mutation | COSM150064  |
| VSCC9 | chr3:78796045-78796045   | G | A | <i>ROBO1</i>   | NM_001145845:exon3:c.C388T:p.R130W,ROBO1    | Missense_Mutation |             |
| VSCC9 | chr3:87027942-87027942   | G | A | <i>VGLL3</i>   | NM_016206:exon2:c.C137T:p.A46V              | Missense_Mutation | COSM1078955 |
| VSCC9 | chr3:130300650-130300650 | T | C | <i>COL6A6</i>  | NM_001102608:exon8:c.T3793C:p.L1265L        | Silent            |             |
| VSCC9 | chr3:137805860-137805860 | C | T | <i>DZIP1L</i>  | NM_173543:exon7:c.G1005A:p.T335T,DZIP1L     | Silent            | COSM1319088 |
| VSCC9 | chr3:147128874-147128874 | G | A | <i>ZIC1</i>    | NM_003412:exon1:c.G975A:p.T325T             | Silent            | COSM4004067 |
| VSCC9 | chr3:147131324-147131324 | G | A | <i>ZIC1</i>    | NM_003412:exon3:c.G1330A:p.E444K            | Missense_Mutation | COSM4419056 |
| VSCC9 | chr3:151105939-151105939 | G | A | <i>MED12L</i>  | NM_053002:exon35:c.G5325A:p.T1775T          | Silent            | COSM4004150 |

|       |                          |   |   |                 |                                                  |                       |             |
|-------|--------------------------|---|---|-----------------|--------------------------------------------------|-----------------------|-------------|
| VSCC9 | chr3:170825920-170825920 | G | A | <i>TNIK</i>     | NM_001161565:exon18:c.C2064<br>T:p.L688L,TNIK    | Silent                | COSM1071611 |
| VSCC9 | chr3:184103903-184103903 | A | C | <i>CHRD</i>     | NM_001304472:exon15:c.A1888<br>C:p.M630L,CHRD    | Missense_M<br>utation |             |
| VSCC9 | chr3:185329461-185329461 | A | T | <i>SENP2</i>    | NM_021627:exon8:c.A745T:p.T2<br>49S              | Missense_M<br>utation |             |
| VSCC9 | chr3:195511849-195511849 | G | A | <i>MUC4</i>     | NM_018406:exon2:c.C6602T:p.<br>A2201V            | Missense_M<br>utation | COSM5001975 |
| VSCC9 | chr4:2664861-2664861     | G | A | <i>FAM193A</i>  | NM_001256666:exon10:c.G1052<br>A:p.S351N,FAM193A | Missense_M<br>utation |             |
| VSCC9 | chr4:2906602-2906602     | G | A | <i>ADD1</i>     | NM_001119:exon10:c.G1273A:p.<br>G425S,ADD1       | Missense_M<br>utation | COSM3761601 |
| VSCC9 | chr4:4276475-4276475     | C | A | <i>LYAR</i>     | NM_001145725:exon7:c.G451T:<br>p.D151Y,LYAR      | Missense_M<br>utation | COSM4003778 |
| VSCC9 | chr4:17710934-17710934   | C | T | <i>FAM184B</i>  | NM_015688:exon2:c.G475A:p.E<br>159K              | Missense_M<br>utation |             |
| VSCC9 | chr4:38945169-38945169   | A | G | <i>FAM114A1</i> | NM_138389:exon15:c.A1683G:p.<br>A561A            | Silent                | COSM3761631 |
| VSCC9 | chr4:40356453-40356453   | G | A | <i>CHRNA9</i>   | NM_017581:exon5:c.G1356A:p.<br>A452A             | Silent                | COSM1643407 |
| VSCC9 | chr4:42424885-42424885   | C | T | <i>ATP8A1</i>   | NM_001105529:exon34:c.G3199<br>A:p.D1067N,ATP8A1 | Missense_M<br>utation |             |
| VSCC9 | chr4:71347000-71347000   | C | T | <i>MUC7</i>     | NM_152291:exon3:c.C539T:p.P1<br>80L,MUC7         | Missense_M<br>utation |             |
| VSCC9 | chr4:77660731-77660731   | C | G | <i>SHROOM3</i>  | NM_020859:exon5:c.C1405G:p.P<br>469A             | Missense_M<br>utation |             |
| VSCC9 | chr4:79385651-79385651   | G | A | <i>FRAS1</i>    | NM_025074:exon49:c.G6943A:p.<br>V2315I           | Missense_M<br>utation | COSM4004423 |
| VSCC9 | chr4:83582211-83582211   | C | G | <i>SCD5</i>     | NM_024906:exon4:c.G589C:p.E<br>197Q              | Missense_M<br>utation |             |
| VSCC9 | chr4:100341861-100341861 | C | T | <i>ADH7</i>     | NM_000673:exon6:c.G690A:p.R<br>230R,ADH7         | Silent                | COSM1131613 |
| VSCC9 | chr4:118975146-118975146 | C | T | <i>NDST3</i>    | NM_004784:exon2:c.C81T:p.I27I                    | Silent                | COSM4416586 |
| VSCC9 | chr4:121738049-121738049 | T | C | <i>PRDM5</i>    | NM_018699:exon6:c.A681G:p.L<br>227L              | Silent                |             |
| VSCC9 | chr4:129019372-129019372 | C | T | <i>LARP1B</i>   | NM_001278604:exon8:c.C700T:<br>p.R234X,LARP1B    | Nonsense_<br>Mutation | COSM3762678 |

|       |                          |   |   |                 |                                             |                   |             |
|-------|--------------------------|---|---|-----------------|---------------------------------------------|-------------------|-------------|
| VSCC9 | chr4:155461113-155461113 | T | C | <i>PLRG1</i>    | NM_001201564:exon11:c.A1005G:p.Q335Q,PLRG1  | Silent            | COSM3762679 |
| VSCC9 | chr4:155720274-155720274 | T | C | <i>RBM46</i>    | NM_001277171:exon4:c.T960C:p.N320N,RBM46    | Silent            | COSM453110  |
| VSCC9 | chr4:177632669-177632669 | G | T | <i>VEGFC</i>    | NM_005429:exon4:c.C688A:p.P230T             | Missense_Mutation | COSM4162422 |
| VSCC9 | chr4:178274565-178274565 | A | G | <i>NEIL3</i>    | NM_018248:exon8:c.A1143G:p.R381R            | Silent            | COSM3927842 |
| VSCC9 | chr5:156289-156289       | G | A | <i>PLEKHG4B</i> | NM_052909:exon8:c.G1244A:p.R415Q            | Missense_Mutation | COSM150355  |
| VSCC9 | chr5:457103-457103       | G | A | <i>EXOC3</i>    | NM_007277:exon5:c.G1146A:p.T382T            | Silent            |             |
| VSCC9 | chr5:5146335-5146335     | C | G | <i>ADAMTS16</i> | NM_139056:exon3:c.C268G:p.P90A              | Missense_Mutation |             |
| VSCC9 | chr5:14751287-14751287   | G | A | <i>ANKH</i>     | NM_054027:exon5:c.C578T:p.P193L             | Missense_Mutation |             |
| VSCC9 | chr5:15937164-15937164   | G | A | <i>FBXL7</i>    | NM_001278317:exon4:c.G1204A:p.V402M,FBXL7   | Missense_Mutation |             |
| VSCC9 | chr5:32385637-32385637   | C | T | <i>ZFR</i>      | NM_016107:exon15:c.G2618A:p.R873Q           | Missense_Mutation |             |
| VSCC9 | chr5:35033605-35033605   | G | A | <i>AGXT2</i>    | NM_001306173:exon6:c.C635T:p.T212I,AGXT2    | Missense_Mutation |             |
| VSCC9 | chr5:66479210-66479210   | C | T | <i>CD180</i>    | NM_005582:exon3:c.G1461A:p.T487T            | Silent            | COSM2859233 |
| VSCC9 | chr5:73090262-73090262   | G | A | <i>ARHGEF28</i> | NM_001080479:exon8:c.G946A:p.E316K,ARHGEF28 | Missense_Mutation | COSM3762419 |
| VSCC9 | chr5:75906923-75906923   | C | G | <i>IQGAP2</i>   | NM_001285461:exon2:c.C95G:p.P32R,IQGAP2     | Missense_Mutation | COSM3762461 |
| VSCC9 | chr5:80600942-80600942   | G | A | <i>ZCCHC9</i>   | NM_001131035:exon2:c.G366A:p.A122A,ZCCHC9   | Silent            |             |
| VSCC9 | chr5:109960989-109960989 | A | G | <i>TMEM232</i>  | NM_001039763:exon7:c.T747C:p.Y249Y          | Silent            |             |
| VSCC9 | chr5:122435627-122435627 | G | A | <i>PRDM6</i>    | NM_001136239:exon3:c.G871A:p.A291T          | Missense_Mutation |             |
| VSCC9 | chr5:134076812-134076812 | G | A | <i>CAMLG</i>    | NM_001745:exon2:c.G232A:p.V78I              | Missense_Mutation | COSM3982474 |

|       |                          |   |   |                  |                                            |                   |             |
|-------|--------------------------|---|---|------------------|--------------------------------------------|-------------------|-------------|
| VSCC9 | chr5:134223593-134223593 | A | G | <i>TXNDC15</i>   | NM_024715:exon2:c.A312G:p.K104K            | Silent            |             |
| VSCC9 | chr5:134782414-134782414 | G | T | <i>DCANP1</i>    | NM_130848:exon1:c.C385A:p.R129R            | Silent            | COSM5063329 |
| VSCC9 | chr5:134782450-134782450 | T | A | <i>DCANP1</i>    | NM_130848:exon1:c.A349T:p.R117X            | Nonsense_Mutation | COSM3779367 |
| VSCC9 | chr5:136969730-136969730 | G | A | <i>KLHL3</i>     | NM_001257195:exon10:c.C1200T:p.G400G,KLHL3 | Silent            |             |
| VSCC9 | chr5:149323852-149323852 | C | T | <i>PDE6A</i>     | NM_000440:exon1:c.G385A:p.D129N            | Missense_Mutation |             |
| VSCC9 | chr5:150930186-150930186 | C | T | <i>FAT2</i>      | NM_001447:exon7:c.G4543A:p.G1515S          | Missense_Mutation | COSM3763069 |
| VSCC9 | chr6:27115069-27115069   | G | C | <i>HIST1H2AH</i> | NM_080596:exon1:c.G162C:p.A54A             | Silent            | COSM5358774 |
| VSCC9 | chr6:28333396-28333396   | T | C | <i>ZKSCAN3</i>   | NM_001242895:exon5:c.T507C:p.H169H,ZKSCAN3 | Silent            |             |
| VSCC9 | chr6:36696514-36696514   | G | A | <i>RAB44</i>     | NM_001257357:exon12:c.G2834A:p.G945E       | Missense_Mutation | COSM4419453 |
| VSCC9 | chr6:39053712-39053712   | C | T | <i>GLP1R</i>     | NM_002062:exon13:c.C1255T:p.R419C          | Missense_Mutation |             |
| VSCC9 | chr6:43014655-43014655   | C | T | <i>CUL7</i>      | NM_001168370:exon10:c.G2612A:p.R871H,CUL7  | Missense_Mutation | COSM280344  |
| VSCC9 | chr6:43166449-43166449   | G | A | <i>CUL9</i>      | NM_015089:exon12:c.G2906A:p.R969H          | Missense_Mutation | COSM1108181 |
| VSCC9 | chr6:50683009-50683009   | T | C | <i>TFAP2D</i>    | NM_172238:exon2:c.T220C:p.F74L             | Missense_Mutation | COSM3906885 |
| VSCC9 | chr6:56420538-56420538   | C | T | <i>DST</i>       | NM_015548:exon41:c.G6872A:p.R2291H,DST     | Missense_Mutation | COSM1109758 |
| VSCC9 | chr6:90362783-90362783   | A | C | <i>MDN1</i>      | NM_014611:exon94:c.T15753G:p.N5251K        | Missense_Mutation |             |
| VSCC9 | chr6:101103625-101103625 | G | A | <i>ASCC3</i>     | NM_006828:exon17:c.C2773T:p.R925W          | Missense_Mutation | COSM4986712 |
| VSCC9 | chr6:111587095-111587095 | C | T | <i>KIAA1919</i>  | NM_153369:exon4:c.C330T:p.I110I            | Silent            | COSM4507953 |
| VSCC9 | chr6:151939181-151939181 | G | A | <i>CCDC170</i>   | NM_025059:exon11:c.G2047A:p.V683I          | Missense_Mutation |             |

|       |                          |   |   |                |                                          |                   |             |
|-------|--------------------------|---|---|----------------|------------------------------------------|-------------------|-------------|
| VSCC9 | chr6:153365100-153365100 | A | C | <i>RGS17</i>   | NM_012419:exon2:c.T54G:p.A18A            | Silent            | COSM22413   |
| VSCC9 | chr6:160196343-160196343 | A | G | <i>ACAT2</i>   | NM_001303253:exon5:c.A719G:p.K240R,ACAT2 | Missense_Mutation | COSM150633  |
| VSCC9 | chr6:160209160-160209160 | G | A | <i>TCP1</i>    | NM_030752:exon2:c.C80T:p.S27L            | Missense_Mutation |             |
| VSCC9 | chr6:160328620-160328620 | C | T | <i>MAS1</i>    | NM_002377:exon1:c.C633T:p.V211V          | Silent            |             |
| VSCC9 | chr7:883033-883033       | C | T | <i>SUN1</i>    | NM_001130965:exon5:c.C534T:p.T178T,SUN1  | Silent            |             |
| VSCC9 | chr7:5414083-5414083     | C | T | <i>TNRC18</i>  | NM_001080495:exon10:c.G2832A:p.A944A     | Silent            | COSM4163540 |
| VSCC9 | chr7:11485756-11485756   | C | T | <i>THSD7A</i>  | NM_015204:exon13:c.G2996A:p.R999H        | Missense_Mutation |             |
| VSCC9 | chr7:21901593-21901593   | G | A | <i>DNAH11</i>  | NM_001277115:exon69:c.G11325A:p.A3775A   | Silent            |             |
| VSCC9 | chr7:22985294-22985294   | C | T | <i>FAM126A</i> | NM_032581:exon11:c.G1480A:p.V494I        | Missense_Mutation | COSM146869  |
| VSCC9 | chr7:23353160-23353160   | A | G | <i>IGF2BP3</i> | NM_006547:exon13:c.T1508C:p.I503T        | Missense_Mutation | COSM1561299 |
| VSCC9 | chr7:32909182-32909182   | G | A | <i>KBTBD2</i>  | NM_015483:exon4:c.C1647T:p.Y549Y         | Silent            | COSM3751888 |
| VSCC9 | chr7:36763748-36763748   | C | T | <i>AOAH</i>    | NM_001177507:exon1:c.G6A:p.Q2Q,AOAH      | Silent            |             |
| VSCC9 | chr7:44282868-44282868   | A | G | <i>CAMK2B</i>  | NM_001220:exon8:c.T582C:p.P194P,CAMK2B   | Silent            |             |
| VSCC9 | chr7:44282877-44282877   | A | G | <i>CAMK2B</i>  | NM_001220:exon8:c.T573C:p.Y191Y,CAMK2B   | Silent            | COSM3751762 |
| VSCC9 | chr7:44282928-44282928   | G | A | <i>CAMK2B</i>  | NM_001220:exon8:c.C522T:p.F174F,CAMK2B   | Silent            | COSM229527  |
| VSCC9 | chr7:73753250-73753250   | T | C | <i>CLIP2</i>   | NM_003388:exon3:c.T594C:p.T198T,CLIP2    | Silent            |             |
| VSCC9 | chr7:100634640-100634640 | T | G | <i>MUC12</i>   | NM_001164462:exon2:c.T796G:p.S266A       | Missense_Mutation | COSM3751857 |
| VSCC9 | chr7:100648029-100648029 | G | A | <i>MUC12</i>   | NM_001164462:exon2:c.G14185A:p.A4729T    | Missense_Mutation |             |

|       |                          |   |   |                |                                           |                   |             |
|-------|--------------------------|---|---|----------------|-------------------------------------------|-------------------|-------------|
| VSCC9 | chr7:100681675-100681675 | C | A | <i>MUC17</i>   | NM_001040105:exon3:c.C6978A:p.T2326T      | Silent            |             |
| VSCC9 | chr7:100681676-100681676 | A | G | <i>MUC17</i>   | NM_001040105:exon3:c.A6979G:p.S2327G      | Missense_Mutation | COSM3751945 |
| VSCC9 | chr7:105429119-105429119 | C | T | <i>ATXN7L1</i> | NM_020725:exon3:c.G286A:p.D96N,ATXN7L1    | Missense_Mutation |             |
| VSCC9 | chr7:116199050-116199050 | C | T | <i>CAVI</i>    | NM_001172896:exon2:c.C153T:p.D51D,CAVI    | Silent            | COSM4964237 |
| VSCC9 | chr7:120979326-120979326 | G | T | <i>WNT16</i>   | NM_016087:exon4:c.G995T:p.C332F,WNT16     | Missense_Mutation |             |
| VSCC9 | chr7:128520041-128520041 | G | A | <i>KCP</i>     | UNKNOWN                                   | unknown           | COSM5420192 |
| VSCC9 | chr7:135262716-135262716 | C | T | <i>NUP205</i>  | NM_015135:exon6:c.C821T:p.A274V           | Missense_Mutation |             |
| VSCC9 | chr7:138732497-138732497 | G | A | <i>ZC3HAV1</i> | NM_020119:exon13:c.C2552T:p.T851I         | Missense_Mutation |             |
| VSCC9 | chr7:143701884-143701884 | C | T | <i>OR6B1</i>   | NM_001005281:exon1:c.C795T:p.A265A        | Silent            | COSM5618921 |
| VSCC9 | chr7:143771937-143771937 | G | C | <i>OR2A25</i>  | NM_001004488:exon1:c.G625C:p.A209P        | Missense_Mutation | COSM147055  |
| VSCC9 | chr7:148876651-148876651 | G | A | <i>ZNF398</i>  | NM_170686:exon6:c.G1687A:p.G563R,ZNF398   | Missense_Mutation | COSM1346601 |
| VSCC9 | chr7:154681216-154681216 | G | A | <i>DPP6</i>    | NM_001290252:exon23:c.G2106A:p.R702R,DPP6 | Silent            | COSM4183352 |
| VSCC9 | chr8:23186007-23186007   | T | C | <i>LOXL2</i>   | NM_002318:exon6:c.A1038G:p.E346E          | Silent            |             |
| VSCC9 | chr8:29018337-29018337   | C | T | <i>KIF13B</i>  | NM_015254:exon13:c.G1317A:p.S439S         | Silent            | COSM3998496 |
| VSCC9 | chr8:75227662-75227662   | G | A | <i>JPH1</i>    | NM_020647:exon2:c.C573T:p.G191G           | Silent            | COSM3998499 |
| VSCC9 | chr8:77766597-77766597   | G | A | <i>ZFHX4</i>   | NM_024721:exon10:c.G7440A:p.T2480T        | Silent            | COSM4417836 |
| VSCC9 | chr8:95871750-95871750   | C | T | <i>INTS8</i>   | NM_017864:exon16:c.C1966T:p.R656C         | Missense_Mutation |             |
| VSCC9 | chr8:106815293-106815293 | G | A | <i>ZFPM2</i>   | NM_012082:exon8:c.G2983A:p.G995S          | Missense_Mutation | COSM3998581 |
| VSCC9 | chr8:143763490-143763490 | T | C | <i>PSCA</i>    | NM_005672:exon3:c.T285C:p.A95A            | Silent            | COSM5601107 |

|       |                          |   |   |               |                                             |                   |               |
|-------|--------------------------|---|---|---------------|---------------------------------------------|-------------------|---------------|
| VSCC9 | chr8:145114778-145114778 | C | T | <i>OPLAH</i>  | NM_017570:exon2:c.G158A:p.R53H              | Missense_Mutation |               |
| VSCC9 | chr8:145114924-145114924 | G | A | <i>OPLAH</i>  | NM_017570:exon2:c.C12T:p.P4P                | Silent            | COSM3752383   |
| VSCC9 | chr9:712137-712137       | G | C | <i>KANK1</i>  | NM_153186:exon2:c.G897C:p.L299L,KANK1       | Silent            |               |
| VSCC9 | chr9:738434-738434       | C | T | <i>KANK1</i>  | NM_153186:exon7:c.C3009T:p.N1003N,KANK1     | Silent            | COSM1354633   |
| VSCC9 | chr9:32481340-32481340   | G | A | <i>DDX58</i>  | NM_014314:exon11:c.C1636T:p.R546W           | Missense_Mutation | COSM4145892   |
| VSCC9 | chr9:32541534-32541534   | C | T | <i>TOPORS</i> | NM_001195622:exon2:c.G2794A:p.D932N, TOPORS | Missense_Mutation | COSM257398    |
| VSCC9 | chr9:33294992-33294992   | G | A | <i>NFX1</i>   | NM_002504:exon2:c.G600A:p.P200P,NFX1        | Silent            | COSM147246    |
| VSCC9 | chr9:72785470-72785470   | G | A | <i>MAMDC2</i> | NM_153267:exon11:c.G1574A:p.R525Q           | Missense_Mutation | COSM147248    |
| VSCC9 | chr9:74974356-74974356   | C | T | <i>ZFAND5</i> | NM_001102421:exon4:c.G345A:p.P115P,ZFAND5   | Silent            | COSM3722579   |
| VSCC9 | chr9:77377410-77377410   | C | T | <i>TRPM6</i>  | NM_001177310:exon26:c.G4162A:p.V1388I,TRPM6 | Missense_Mutation |               |
| VSCC9 | chr9:79834875-79834875   | C | T | <i>VPS13A</i> | NM_001018037:exon11:c.C760T:p.R254C,VPS13A  | Missense_Mutation |               |
| VSCC9 | chr9:88938280-88938280   | G | A | <i>ZCCHC6</i> | NM_001185074:exon9:c.C2016T:p.P672P,ZCCHC6  | Silent            |               |
| VSCC9 | chr4:55152040-55152040   | C | T | <i>PDGFRA</i> | NM_006206:exon18:c.C2472T:p.V824V           | Silent            | <i>PDGFRA</i> |
| VSCC9 | chr9:95284873-95284873   | A | G | <i>ECM2</i>   | NM_001197295:exon2:c.T276C:p.S92S,ECM2      | Silent            | COSM4146081   |
| VSCC9 | chr9:125330016-125330016 | G | A | <i>ORIL8</i>  | NM_001004454:exon1:c.C741T:p.T247T          | Silent            | COSM1356602   |
| VSCC9 | chr9:130207074-130207074 | G | A | <i>ZNF79</i>  | NM_001286698:exon3:c.G693A:p.A231A,ZNF79    | Silent            | COSM329305    |
| VSCC9 | chr9:136212053-136212053 | C | T | <i>MED22</i>  | NM_133640:exon3:c.G178A:p.E60K,MED22        | Missense_Mutation |               |
| VSCC9 | chr9:139235526-139235526 | C | A | <i>GPSM1</i>  | NM_015597:exon9:c.C1283A:p.S428X            | Nonsense_Mutation |               |
| VSCC9 | chr9:139571442-139571442 | C | T | <i>AGPAT2</i> | NM_001012727:exon3:c.G463A:p.D155N,AGPAT2   | Missense_Mutation | COSM147294    |



|       |                          |   |   |                   |                                            |                   |             |
|-------|--------------------------|---|---|-------------------|--------------------------------------------|-------------------|-------------|
| VSCC9 | chr9:140036577-140036577 | G | A | <i>GRIN1</i>      | NM_000832:exon2:c.G371A:p.R124H,GRIN1      | Missense_Mutation |             |
| VSCC9 | chr10:5541181-5541181    | T | C | <i>CALML5</i>     | NM_017422:exon1:c.A221G:p.K74R             | Missense_Mutation | COSM3998630 |
| VSCC9 | chr10:5541183-5541183    | C | T | <i>CALML5</i>     | NM_017422:exon1:c.G219A:p.A73A             | Silent            | COSM763     |
| VSCC9 | chr10:6262702-6262702    | C | T | <i>PFKFB3</i>     | NM_001145443:exon8:c.C645T:p.I215I,PFKFB3  | Silent            |             |
| VSCC9 | chr10:21108395-21108395  | C | T | <i>NEBL</i>       | NM_006393:exon20:c.G2013A:p.P671P          | Silent            | COSM4145408 |
| VSCC9 | chr10:30316872-30316872  | T | C | <i>KIAA1462</i>   | NM_020848:exon3:c.A2205G:p.A735A           | Silent            |             |
| VSCC9 | chr10:35772402-35772402  | G | A | <i>CCNY</i>       | NM_145012:exon2:c.G225A:p.T75T,CCNY        | Silent            | COSM4416248 |
| VSCC9 | chr10:43659372-43659372  | C | T | <i>CSGALNACT2</i> | NM_018590:exon5:c.C1039T:p.R347X           | Nonsense_Mutation |             |
| VSCC9 | chr10:50341954-50341954  | A | G | <i>FAM170B</i>    | NM_001164484:exon1:c.T10C:p.Y4H            | Missense_Mutation | COSM763     |
| VSCC9 | chr10:53458167-53458167  | C | T | <i>CSTF2T</i>     | NM_015235:exon1:c.G1143A:p.R381R           | Silent            | COSM937839  |
| VSCC9 | chr10:71168766-71168766  | C | G | <i>TACR2</i>      | NM_001057:exon3:c.G653C:p.S218T            | Missense_Mutation |             |
| VSCC9 | chr10:73082563-73082563  | A | G | <i>SLC29A3</i>    | NM_001174098:exon2:c.A52G:p.R18G,SLC29A3   | Missense_Mutation | COSM3753192 |
| VSCC9 | chr10:73544086-73544086  | G | A | <i>CDH23</i>      | NM_022124:exon40:c.G5411A:p.R1804Q         | Missense_Mutation | COSM1225466 |
| VSCC9 | chr10:75602244-75602244  | C | T | <i>CAMK2G</i>     | NM_001204492:exon11:c.G875A:p.R292H,CAMK2G | Missense_Mutation |             |
| VSCC9 | chr10:84498398-84498398  | C | T | <i>NRG3</i>       | NM_001010848:exon3:c.C1019T:p.S340L,NRG3   | Missense_Mutation |             |
| VSCC9 | chr10:87362141-87362141  | C | T | <i>GRID1</i>      | NM_017551:exon16:c.G2919A:p.G973G          | Silent            |             |
| VSCC9 | chr10:88203068-88203068  | T | C | <i>WAPL</i>       | NM_015045:exon17:c.A3375G:p.T1125T         | Silent            |             |
| VSCC9 | chr10:94816756-94816756  | C | T | <i>EXOC6</i>      | NM_001013848:exon21:c.C2230T;p.R744W,EXOC6 | Missense_Mutation |             |

|       |                           |   |   |                    |                                                 |                       |             |
|-------|---------------------------|---|---|--------------------|-------------------------------------------------|-----------------------|-------------|
| VSCC9 | chr10:99969568-99969568   | A | G | <i>R3HCC1L</i>     | NM_001256620:exon4:c.A1697G<br>:p.H566R,R3HCC1L | Missense_M<br>utation | COSM4166799 |
| VSCC9 | chr10:104174895-104174895 | G | A | <i>PSD</i>         | NM_002779:exon4:c.C849T:p.Y<br>283Y,PSD         | Silent                |             |
| VSCC9 | chr10:117884950-117884950 | G | A | <i>GFRA1</i>       | NM_145793:exon4:c.C537T:p.N<br>179N,GFRA1       | Silent                | COSM4407349 |
| VSCC9 | chr10:126715519-126715519 | G | A | <i>CTBP2</i>       | NM_022802:exon1:c.C810T:p.Y<br>270Y             | Silent                |             |
| VSCC9 | chr11:1016756-1016756     | G | A | <i>MUC6</i>        | NM_005961:exon31:c.C6045T:p.<br>S2015S          | Silent                | COSM3458024 |
| VSCC9 | chr11:1262312-1262312     | G | A | <i>MUC5B</i>       | NM_002458:exon31:c.G4202A:p.<br>R1401H          | Missense_M<br>utation |             |
| VSCC9 | chr11:5906143-5906143     | T | C | <i>OR52E4</i>      | NM_001005165:exon1:c.T621C:<br>p.Y207Y          | Silent                | COSM3999043 |
| VSCC9 | chr11:5906291-5906291     | T | C | <i>OR52E4</i>      | NM_001005165:exon1:c.T769C:<br>p.F257L          | Missense_M<br>utation | COSM3999047 |
| VSCC9 | chr11:5969185-5969185     | A | G | <i>OR56A3</i>      | NM_001003443:exon1:c.A609G:<br>p.Q203Q          | Silent                | COSM3765703 |
| VSCC9 | chr11:6341531-6341531     | C | A | <i>PRKCDBP</i>     | NM_145040:exon1:c.G176T:p.R<br>59L              | Missense_M<br>utation | COSM1205323 |
| VSCC9 | chr11:7441737-7441737     | T | C | <i>SYT9</i>        | NM_175733:exon6:c.T1338C:p.R<br>446R            | Silent                |             |
| VSCC9 | chr11:13441289-13441289   | C | T | <i>BTBD10</i>      | NM_001297741:exon3:c.G158A:<br>p.R53Q,BTBD10    | Missense_M<br>utation | COSM147683  |
| VSCC9 | chr11:18195047-18195047   | C | T | <i>MRGPRX4</i>     | NM_054032:exon1:c.C244T:p.R8<br>2C              | Missense_M<br>utation | COSM3793119 |
| VSCC9 | chr11:47270255-47270255   | C | T | <i>ACP2</i>        | NM_001302490:exon1:c.G86A:p.<br>R29Q,ACP2       | Missense_M<br>utation | COSM273833  |
| VSCC9 | chr11:47360104-47360104   | C | T | <i>MYBPC3</i>      | NM_000256:exon22:c.G2275A:p.<br>E759K           | Missense_M<br>utation | COSM954587  |
| VSCC9 | chr11:56143125-56143125   | C | T | <i>OR8U1,OR8U8</i> | NM_001005204:exon1:c.C26T:p.<br>A9V             | Missense_M<br>utation |             |
| VSCC9 | chr11:56431216-56431216   | C | T | <i>OR5AR1</i>      | NM_001004730:exon1:c.C55T:p.<br>Q19X            | Nonsense_<br>Mutation |             |
| VSCC9 | chr11:57472676-57472676   | C | T | <i>MED19</i>       | NM_001317078:exon2:c.G294A:<br>p.T98T,MED19     | Silent                |             |

|       |                           |   |   |                 |                                           |                   |             |
|-------|---------------------------|---|---|-----------------|-------------------------------------------|-------------------|-------------|
| VSCC9 | chr11:58170143-58170143   | C | G | <i>OR5B3</i>    | NM_001005469:exon1:c.G740C:p.G247A        | Missense_Mutation |             |
| VSCC9 | chr11:58170374-58170374   | T | C | <i>OR5B3</i>    | NM_001005469:exon1:c.A509G:p.N170S        | Missense_Mutation | COSM5426023 |
| VSCC9 | chr11:60531346-60531346   | T | G | <i>MS4A15</i>   | NM_001098835:exon2:c.T140G:p.L47R,MS4A15  | Missense_Mutation | COSM957291  |
| VSCC9 | chr11:60687341-60687341   | G | A | <i>TMEM109</i>  | NM_024092:exon2:c.G176A:p.R59Q            | Missense_Mutation | COSM3749263 |
| VSCC9 | chr11:62159627-62159627   | C | T | <i>ASRGL1</i>   | NM_001083926:exon7:c.C798T:p.I266I,ASRGL1 | Silent            | COSM959905  |
| VSCC9 | chr11:62285859-62285859   | C | T | <i>AHNAK</i>    | NM_001620:exon5:c.G16030A:p.G5344S        | Missense_Mutation |             |
| VSCC9 | chr11:63885305-63885305   | C | T | <i>FLRT1</i>    | NM_013280:exon2:c.C1566T:p.P522P          | Silent            |             |
| VSCC9 | chr11:64606177-64606177   | C | T | <i>CDC42BPG</i> | NM_017525:exon8:c.G1074A:p.G358G          | Silent            |             |
| VSCC9 | chr11:69063510-69063510   | G | A | <i>MYEOV</i>    | NM_001293294:exon2:c.G419A:p.R140Q,MYEOV  | Missense_Mutation |             |
| VSCC9 | chr11:71146577-71146577   | G | A | <i>DHCR7</i>    | NM_001163817:exon9:c.C1272T:p.G424G,DHCR7 | Silent            |             |
| VSCC9 | chr11:74547352-74547352   | G | A | <i>RNF169</i>   | NM_001098638:exon6:c.G1704A:p.M568I       | Missense_Mutation | COSM3754332 |
| VSCC9 | chr11:76912616-76912616   | G | A | <i>MYO7A</i>    | NM_000260:exon36:c.G4976A:p.R1659H,MYO7A  | Missense_Mutation | COSM3999534 |
| VSCC9 | chr11:77553638-77553638   | T | C | <i>AAMDC</i>    | NM_024684:exon2:c.T96C:p.G32G,AAMDC       | Silent            |             |
| VSCC9 | chr11:93913036-93913036   | A | G | <i>PANX1</i>    | NM_015368:exon4:c.A814G:p.I272V           | Missense_Mutation | COSM1177068 |
| VSCC9 | chr11:94113466-94113466   | G | T | <i>GPR83</i>    | NM_016540:exon4:c.C1121A:p.P374Q          | Missense_Mutation |             |
| VSCC9 | chr11:109294920-109294920 | C | T | <i>C11orf87</i> | NM_207645:exon2:c.C561T:p.G187G           | Silent            |             |
| VSCC9 | chr11:120996292-120996292 | A | G | <i>TECTA</i>    | NM_005422:exon7:c.A1485G:p.A495A          | Silent            |             |
| VSCC9 | chr11:123813823-123813823 | G | A | <i>OR6T1</i>    | NM_001005187:exon1:c.C723T:p.C241C        | Silent            |             |

|       |                           |   |   |                 |                                            |                   |               |
|-------|---------------------------|---|---|-----------------|--------------------------------------------|-------------------|---------------|
| VSCC9 | chr11:123813940-123813940 | G | C | <i>OR6T1</i>    | NM_001005187:exon1:c.C606G:p.L202L         | Silent            | COSM3999659   |
| VSCC9 | chr12:936296-936296       | C | T | <i>WNK1</i>     | NM_001184985:exon3:c.C1021T;p.R341X,WNK1   | Nonsense_Mutation | COSM3999663   |
| VSCC9 | chr12:20799803-20799803   | G | A | <i>PDE3A</i>    | NM_001244683:exon11:c.G1518A;p.A506A,PDE3A | Silent            |               |
| VSCC9 | chr12:31632897-31632897   | T | C | <i>DENND5B</i>  | NM_144973:exon3:c.A530G:p.N177S,DENND5B    | Missense_Mutation | COSM3957050   |
| VSCC9 | chr12:32908237-32908237   | C | A | <i>YARS2</i>    | NM_001040436:exon1:c.G572T;p.G191V         | Missense_Mutation | COSM1375381   |
| VSCC9 | chr12:46318587-46318587   | G | A | <i>SCAF11</i>   | NM_004719:exon12:c.C3830T;p.P1277L         | Missense_Mutation | COSM3999698   |
| VSCC9 | chr12:48179185-48179185   | C | T | <i>HDAC7</i>    | NM_001098416:exon23:c.G2665A;p.V889M,HDAC7 | Missense_Mutation | COSM5740475   |
| VSCC9 | chr12:49177113-49177113   | T | G | <i>ADCY6</i>    | NM_015270:exon2:c.A105C:p.A35A             | Silent            |               |
| VSCC9 | chr12:56335985-56335985   | C | T | <i>DGKA</i>     | NM_001345:exon17:c.C1364T;p.P455L,DGKA     | Missense_Mutation |               |
| VSCC9 | chr12:57036611-57036611   | G | A | <i>ATP5B</i>    | NM_001686:exon6:c.C797T;p.A266V            | Missense_Mutation | COSM3736445   |
| VSCC9 | chr12:57595624-57595624   | G | A | <i>LRP1</i>     | NM_002332:exon67:c.G10530A;p.A3510A        | Silent            | COSM968747    |
| VSCC9 | chr12:105446616-105446616 | C | T | <i>ALDH1L2</i>  | NM_001034173:exon11:c.G1381A;p.D461N       | Missense_Mutation |               |
| VSCC9 | chr12:106633904-106633904 | G | A | <i>CKAP4</i>    | NM_006825:exon2:c.C707T;p.T236M            | Missense_Mutation | COSM4128848   |
| VSCC9 | chr5:67522722-67522722    | C | T | <i>PIK3R1</i>   | NM_181523:exon2:c.C219T;p.Y73Y             | Silent            | <i>PIK3R1</i> |
| VSCC9 | chr12:123661254-123661254 | C | T | <i>MPHOSPH9</i> | NM_022782:exon16:c.G2437A;p.V813M          | Missense_Mutation | COSM1709105   |
| VSCC9 | chr12:129559446-129559446 | C | T | <i>TMEM132D</i> | NM_133448:exon9:c.G2274A;p.A758A           | Silent            |               |
| VSCC9 | chr13:23908034-23908034   | A | G | <i>SACS</i>     | NM_001278055:exon8:c.T9540C;p.A3180A,SACS  | Silent            |               |
| VSCC9 | chr13:23913827-23913827   | G | A | <i>SACS</i>     | NM_001278055:exon8:c.C3747T;p.H1249H,SACS  | Silent            |               |

|       |                           |   |   |               |                                                 |                       |             |
|-------|---------------------------|---|---|---------------|-------------------------------------------------|-----------------------|-------------|
| VSCC9 | chr13:43788158-43788158   | G | A | <i>ENOX1</i>  | NM_001127615:exon17:c.C1900<br>T:p.L634L,ENOX1  | Silent                |             |
| VSCC9 | chr13:43798251-43798251   | C | T | <i>ENOX1</i>  | NM_001127615:exon16:c.G1738<br>A:p.V580I,ENOX1  | Missense_M<br>utation | COSM2692896 |
| VSCC9 | chr13:44948206-44948206   | C | A | <i>SERP2</i>  | NM_001010897:exon1:c.C45A:p.<br>S15R            | Missense_M<br>utation | COSM5618448 |
| VSCC9 | chr13:46067593-46067593   | G | A | <i>COG3</i>   | NM_031431:exon12:c.G1299A:p.<br>E433E           | Silent                |             |
| VSCC9 | chr13:110435362-110435362 | C | T | <i>IRS2</i>   | NM_003749:exon1:c.G3039A:p.<br>P1013P           | Silent                |             |
| VSCC9 | chr14:23072381-23072381   | G | A | <i>ABHD4</i>  | NM_022060:exon3:c.G199A:p.D<br>67N              | Missense_M<br>utation |             |
| VSCC9 | chr14:23419597-23419597   | C | T | <i>HAUS4</i>  | NM_001166270:exon5:c.G353A:<br>p.R118Q,HAUS4    | Missense_M<br>utation | COSM1382640 |
| VSCC9 | chr14:24773449-24773449   | G | A | <i>NOP9</i>   | NM_174913:exon8:c.G1613A:p.<br>R538H            | Missense_M<br>utation |             |
| VSCC9 | chr14:45633698-45633698   | G | A | <i>FANCM</i>  | NM_001308133:exon9:c.G1640A<br>:p.R547Q,FANCM   | Missense_M<br>utation | COSM3755545 |
| VSCC9 | chr14:64644184-64644184   | G | A | <i>SYNE2</i>  | NM_015180:exon96:c.G17539A:<br>p.E5847K,SYNE2   | Missense_M<br>utation |             |
| VSCC9 | chr14:64688354-64688354   | C | T | <i>SYNE2</i>  | NM_182910:exon5:c.C688T:p.Q<br>230X,SYNE2       | Nonsense_<br>Mutation |             |
| VSCC9 | chr14:65406343-65406343   | G | A | <i>GPX2</i>   | UNKNOWN                                         | unknown               | COSM3766226 |
| VSCC9 | chr14:69701577-69701577   | G | A | <i>EXD2</i>   | NM_018199:exon4:c.G503A:p.R<br>168Q,EXD2        | Missense_M<br>utation |             |
| VSCC9 | chr14:104643421-104643421 | T | C | <i>KIF26A</i> | NM_015656:exon12:c.T4296C:p.<br>L1432L          | Silent                | COSM3755268 |
| VSCC9 | chr15:23812358-23812358   | C | T | <i>MKRN3</i>  | NM_005664:exon1:c.C1429T:p.R<br>477W            | Missense_M<br>utation |             |
| VSCC9 | chr15:31319132-31319132   | C | T | <i>TRPM1</i>  | NM_001252020:exon25:c.G3533<br>A:p.R1178Q,TRPM1 | Missense_M<br>utation | COSM4065082 |
| VSCC9 | chr15:41192040-41192040   | C | T | <i>VPS18</i>  | NM_020857:exon4:c.C1024T:p.R<br>342W            | Missense_M<br>utation | COSM3795591 |
| VSCC9 | chr15:41192186-41192186   | C | T | <i>VPS18</i>  | NM_020857:exon4:c.C1170T:p.<br>H390H            | Silent                |             |
| VSCC9 | chr15:43028592-43028592   | G | A | <i>CDANI</i>  | NM_138477:exon2:c.C477T:p.P1<br>59P             | Silent                | COSM3720940 |

|       |                         |   |   |                |                                              |                   |             |
|-------|-------------------------|---|---|----------------|----------------------------------------------|-------------------|-------------|
| VSCC9 | chr15:43579566-43579566 | A | G | <i>TGM7</i>    | NM_052955:exon6:c.T777C:p.S259S              | Silent            |             |
| VSCC9 | chr15:43762196-43762196 | C | T | <i>TP53BP1</i> | NM_001141979:exon11:c.G1249A:p.G417S,TP53BP1 | Missense_Mutation |             |
| VSCC9 | chr15:43818052-43818052 | G | A | <i>MAP1A</i>   | NM_002373:exon4:c.G4381A:p.D1461N            | Missense_Mutation | COSM4271002 |
| VSCC9 | chr15:43818907-43818907 | G | A | <i>MAP1A</i>   | NM_002373:exon4:c.G5236A:p.A1746T            | Missense_Mutation |             |
| VSCC9 | chr15:54707217-54707217 | G | A | <i>UNC13C</i>  | NM_001080534:exon17:c.G4885A:p.E1629K        | Missense_Mutation |             |
| VSCC9 | chr15:65295520-65295520 | C | A | <i>MTFMT</i>   | NM_139242:exon9:c.G1050T:p.L350F             | Missense_Mutation |             |
| VSCC9 | chr15:68506655-68506655 | G | A | <i>CLN6</i>    | NM_017882:exon3:c.C270T:p.N90N               | Silent            | COSM2806345 |
| VSCC9 | chr15:75042401-75042401 | C | T | <i>CYP1A2</i>  | NM_000761:exon2:c.C322T:p.R108W              | Missense_Mutation |             |
| VSCC9 | chr15:75137934-75137934 | G | A | <i>SCAMP2</i>  | NM_005697:exon8:c.C735T:p.S245S              | Silent            | COSM1221822 |
| VSCC9 | chr15:86123924-86123924 | C | T | <i>AKAP13</i>  | NM_006738:exon7:c.C2625T:p.P875P,AKAP13      | Silent            |             |
| VSCC9 | chr15:86124483-86124483 | C | G | <i>AKAP13</i>  | NM_006738:exon7:c.C3184G:p.P1062A,AKAP13     | Missense_Mutation |             |
| VSCC9 | chr15:89421249-89421249 | G | A | <i>HAPLN3</i>  | NM_178232:exon5:c.C1035T:p.P345P,HAPLN3      | Silent            |             |
| VSCC9 | chr15:89871702-89871702 | G | A | <i>POLG</i>    | NM_001126131:exon6:c.C1235T:p.P412L,POLG     | Missense_Mutation |             |
| VSCC9 | chr15:90349232-90349232 | G | A | <i>ANPEP</i>   | NM_001150:exon2:c.C583T:p.R195C              | Missense_Mutation |             |
| VSCC9 | chr15:99670161-99670161 | C | T | <i>SYNM</i>    | UNKNOWN                                      | unknown           |             |
| VSCC9 | chr15:99670278-99670278 | C | T | <i>SYNM</i>    | UNKNOWN                                      | unknown           |             |
| VSCC9 | chr16:1826147-1826147   | C | T | <i>EME2</i>    | NM_001257370:exon8:c.C1048T:p.R350C          | Missense_Mutation |             |
| VSCC9 | chr16:2024811-2024811   | G | A | <i>TBL3</i>    | NM_006453:exon6:c.G427A:p.G143R              | Missense_Mutation | COSM5020604 |
| VSCC9 | chr7:6026988-6026988    | G | A | <i>PMS2</i>    | NM_000535:exon11:c.C1408T:p.P470S            | Missense_Mutation | <i>PMS2</i> |

|       |                         |   |   |                 |                                              |                   |             |
|-------|-------------------------|---|---|-----------------|----------------------------------------------|-------------------|-------------|
| VSCC9 | chr16:2338039-2338039   | G | A | <i>ABCA3</i>    | NM_001089:exon21:c.C2992T:p.R998C            | Missense_Mutation |             |
| VSCC9 | chr16:17353212-17353212 | C | T | <i>XYLT1</i>    | NM_022166:exon3:c.G546A:p.A182A              | Silent            |             |
| VSCC9 | chr16:27238110-27238110 | C | T | <i>NSMCE1</i>   | NM_145080:exon6:c.G531A:p.E177E              | Silent            |             |
| VSCC9 | chr16:27788317-27788317 | G | A | <i>KIAA0556</i> | NM_015202:exon25:c.G4518A:p.A1506A           | Silent            |             |
| VSCC9 | chr16:31925806-31925806 | C | T | <i>ZNF267</i>   | NM_003414:exon4:c.C236T:p.S79L,ZNF267        | Missense_Mutation |             |
| VSCC9 | chr16:49660126-49660126 | C | T | <i>ZNF423</i>   | NM_001271620:exon5:c.G3352A:p.E1118K,ZNF423  | Missense_Mutation | COSM4000562 |
| VSCC9 | chr16:56918023-56918023 | G | A | <i>SLC12A3</i>  | NM_000339:exon14:c.G1732A:p.V578M,SLC12A3    | Missense_Mutation | COSM4000569 |
| VSCC9 | chr16:57077457-57077457 | C | T | <i>NLRC5</i>    | NM_032206:exon19:c.C3144T:p.A1048A           | Silent            |             |
| VSCC9 | chr16:57604382-57604382 | C | T | <i>ADGRG5</i>   | NM_001304376:exon10:c.C1143T:p.Y381Y,ADGRG5  | Silent            |             |
| VSCC9 | chr16:81077066-81077066 | C | T | <i>ATMIN</i>    | NM_001300728:exon4:c.C495T:p.A165A,ATMIN     | Silent            | COSM3756602 |
| VSCC9 | chr16:84256103-84256103 | C | T | <i>KCNG4</i>    | NM_172347:exon3:c.G1280A:p.R427H             | Missense_Mutation | COSM252370  |
| VSCC9 | chr16:84623757-84623757 | C | T | <i>COTL1</i>    | NM_021149:exon3:c.G272A:p.R91H               | Missense_Mutation |             |
| VSCC9 | chr16:89254650-89254650 | G | A | <i>CDH15</i>    | NM_004933:exon7:c.G935A:p.R312H              | Missense_Mutation |             |
| VSCC9 | chr17:2278891-2278891   | G | A | <i>SGSM2</i>    | NM_001098509:exon17:c.G2071A:p.V691M,SGSM2   | Missense_Mutation | COSM3535259 |
| VSCC9 | chr17:3324785-3324785   | C | T | <i>OR3A3</i>    | NM_012373:exon1:c.C924T:p.G308G              | Silent            | COSM148667  |
| VSCC9 | chr17:3494622-3494622   | C | T | <i>TRPV1</i>    | NM_080706:exon2:c.G310A:p.A104T,TRPV1        | Missense_Mutation |             |
| VSCC9 | chr17:3999199-3999199   | C | T | <i>ZZEF1</i>    | NM_015113:exon11:c.G1839A:p.A613A            | Silent            |             |
| VSCC9 | chr17:4446342-4446342   | C | T | <i>MYBBP1A</i>  | NM_001105538:exon20:c.G2758A:p.A920T,MYBBP1A | Missense_Mutation |             |

|       |                           |   |   |           |                                                              |          |             |
|-------|---------------------------|---|---|-----------|--------------------------------------------------------------|----------|-------------|
| VSCC9 | chr17:7606757-7606757     | G | A | WRAP53    | NM_018081:exon10:c.G1600A:p. Missense_M<br>E534K,WRAP53      | utation  | COSM3757097 |
| VSCC9 | chr17:8022065-8022065     | G | A | ALOXE3    | NM_001165960:exon1:c.C32T:p. Missense_M<br>P11L              | utation  |             |
| VSCC9 | chr17:10535936-10535936   | C | T | MYH3      | NM_002470:exon34:c.G4813A:p. Missense_M<br>E1605K            | utation  | COSM1024494 |
| VSCC9 | chr17:15215660-15215660   | T | C | TEKT3     | NM_031898:exon7:c.A1017G:p. Silent<br>Q339Q                  |          | COSM5766479 |
| VSCC9 | chr17:27209366-27209366   | C | T | FLOT2     | NM_004475:exon6:c.G568A:p.A Missense_M<br>190T               | utation  | COSM4819857 |
| VSCC9 | chr17:27209367-27209367   | G | A | FLOT2     | NM_004475:exon6:c.C567T:p.D Silent<br>189D                   |          | COSM2705231 |
| VSCC9 | chr17:39274518-39274518   | C | T | KRTAP4-11 | NM_033059:exon1:c.G50A:p.R1 Missense_M<br>7Q                 | utation  |             |
| VSCC9 | chr17:39594356-39594356   | G | A | KRT38     | NM_006771:exon6:c.C1230T:p.S Silent<br>410S                  |          | COSM5857774 |
| VSCC9 | chr17:47246163-47246163   | T | C | B4GALNT2  | NM_001159387:exon10:c.T1216 Missense_M<br>C;p.C406R,B4GALNT2 | utation  | COSM3389794 |
| VSCC9 | chr17:48917176-48917176   | G | A | WFIKKN2   | NM_175575:exon2:c.G527A:p.R Missense_M<br>176H               | utation  | COSM4756018 |
| VSCC9 | chr17:65026648-65026648   | G | A | CACNG4    | NM_014405:exon4:c.G512A:p.R Missense_M<br>171Q               | utation  | COSM1198590 |
| VSCC9 | chr17:72815931-72815931   | G | A | TMEM104   | NM_017728:exon9:c.G679A:p.V Missense_M<br>227I               | utation  | COSM4294522 |
| VSCC9 | chr12:133236034-133236034 | C | T | POLE      | NM_006231:exon26:c.G3122A:p. Missense_M<br>R1041Q            | utation  | POLE        |
| VSCC9 | chr1:3347539-3347539      | G | A | PRDM16    | NM_022114:exon15:c.G3388A:p. Missense_M<br>D1130N,PRDM16     | utation  | PRDM16      |
| VSCC9 | chr17:80129699-80129699   | C | T | CCDC57    | NM_198082:exon12:c.G1760A:p. Missense_M<br>R587Q,CCDC57      | utation  |             |
| VSCC9 | chr18:9547822-9547822     | C | T | PPP4R1    | NM_001042388:exon20:c.G2818 Missense_M<br>A;p.E940K,PPP4R1   | utation  | COSM4418749 |
| VSCC9 | chr18:9577186-9577186     | G | A | PPP4R1    | NM_001042388:exon10:c.C922T Missense_M<br>;p.R308C,PPP4R1    | utation  |             |
| VSCC9 | chr18:29453405-29453405   | G | A | TRAPPC8   | NM_014939:exon14:c.C2050T:p. Nonsense_<br>R684X              | Mutation |             |



|       |                         |   |   |                                |                                                  |                       |             |
|-------|-------------------------|---|---|--------------------------------|--------------------------------------------------|-----------------------|-------------|
| VSCC9 | chr18:29867504-29867504 | T | C | <i>GAREM1</i>                  | NM_001242409:exon4:c.A1056G<br>:p.E352E,GAREM1   | Silent                | COSM3759115 |
| VSCC9 | chr18:31709861-31709861 | C | T | <i>NOLA</i>                    | NM_001198546:exon2:c.G388A:<br>p.A130T,NOLA      | Missense_M<br>utation | COSM3759120 |
| VSCC9 | chr18:60646474-60646474 | C | T | <i>PHLPP1</i>                  | NM_194449:exon17:c.C4964T:p.<br>P1655L           | Missense_M<br>utation | COSM4736304 |
| VSCC9 | chr18:61306965-61306965 | G | A | <i>SERPINB4</i>                | NM_002974:exon6:c.C515T:p.T1<br>72M,SERPINB4     | Missense_M<br>utation |             |
| VSCC9 | chr18:61558737-61558737 | C | A | <i>SERPINB2</i>                | NM_002575:exon2:c.C59A:p.A2<br>0E,SERPINB2       | Missense_M<br>utation | COSM4002198 |
| VSCC9 | chr19:1120014-1120014   | G | A | <i>SBNO2</i>                   | NM_001100122:exon9:c.C987T:<br>p.F329F,SBNO2     | Silent                |             |
| VSCC9 | chr19:5832408-5832408   | G | A | <i>FUT6</i>                    | NM_001040701:exon2:c.C171T:<br>p.P57P,FUT6       | Silent                |             |
| VSCC9 | chr19:7141775-7141775   | G | A | <i>INSR</i>                    | NM_001079817:exon12:c.C2559<br>T:p.N853N,INSR    | Silent                |             |
| VSCC9 | chr19:10224548-10224548 | G | A | <i>P2RY11,PPAN-<br/>P2RY11</i> | NM_002566:exon2:c.G259A:p.A<br>87T,PPAN-P2RY11   | Missense_M<br>utation | COSM1118827 |
| VSCC9 | chr19:10335105-10335105 | C | T | <i>SIPR2</i>                   | NM_004230:exon2:c.G477A:p.S<br>159S              | Silent                | COSM4108608 |
| VSCC9 | chr19:16905360-16905360 | C | T | <i>NWD1</i>                    | NM_001007525:exon15:c.C3300<br>T:p.A1100A,NWD1   | Silent                |             |
| VSCC9 | chr19:17163658-17163658 | C | T | <i>HAUS8</i>                   | NM_001011699:exon10:c.G903A<br>:p.A301A,HAUS8    | Silent                | COSM5652754 |
| VSCC9 | chr19:17173588-17173588 | G | A | <i>HAUS8</i>                   | NM_001011699:exon4:c.C149T:<br>p.A50V,HAUS8      | Missense_M<br>utation |             |
| VSCC9 | chr19:18180413-18180413 | C | G | <i>IL12RB1</i>                 | NM_001290023:exon10:c.G1132<br>C:p.G378R,IL12RB1 | Missense_M<br>utation |             |
| VSCC9 | chr19:18180451-18180451 | A | G | <i>IL12RB1</i>                 | NM_001290023:exon10:c.T1094<br>C:p.M365T,IL12RB1 | Missense_M<br>utation | COSM3563988 |
| VSCC9 | chr19:18191664-18191664 | C | G | <i>IL12RB1</i>                 | NM_001290023:exon4:c.G387C:<br>p.V129V,IL12RB1   | Silent                | COSM3143238 |
| VSCC9 | chr19:19824903-19824903 | C | T | <i>ZNF14</i>                   | NM_021030:exon3:c.G188A:p.R<br>63Q               | Missense_M<br>utation |             |
| VSCC9 | chr19:33353061-33353061 | G | T | <i>SLC7A9</i>                  | NM_001126335:exon6:c.C667A:<br>p.L223M,SLC7A9    | Missense_M<br>utation |             |

|       |                           |   |   |                |                                              |                   |               |
|-------|---------------------------|---|---|----------------|----------------------------------------------|-------------------|---------------|
| VSCC9 | chr19:36041988-36041988   | C | T | <i>ATP4A</i>   | NM_000704:exon20:c.G2911A:p.V971M            | Missense_Mutation |               |
| VSCC9 | chr19:37854196-37854196   | C | T | <i>HKR1</i>    | NM_181786:exon6:c.C1499T:p.500M              | Missense_Mutation |               |
| VSCC9 | chr19:39037155-39037155   | C | T | <i>RYR1</i>    | NM_001042723:exon87:c.C12068T;p.S4023L,RYR1  | Missense_Mutation |               |
| VSCC9 | chr19:43920619-43920619   | C | T | <i>TEX101</i>  | NM_001130011:exon4:c.C303T:p.I101I,TEX101    | Silent            |               |
| VSCC9 | chr19:44636802-44636802   | A | T | <i>ZNF225</i>  | NM_013362:exon5:c.A2035T:p.679S              | Missense_Mutation |               |
| VSCC9 | chr19:49129255-49129255   | G | A | <i>SPHK2</i>   | NM_001204160:exon2:c.G39A:p.P13P,SPHK2       | Silent            |               |
| VSCC9 | chr19:50102675-50102675   | G | A | <i>PRR12</i>   | NM_020719:exon5:c.G3825A:p.P1275P            | Silent            |               |
| VSCC9 | chr19:50361208-50361208   | C | T | <i>PTOV1</i>   | NM_001305105:exon8:c.C852T:p.H284H,PTOV1     | Silent            |               |
| VSCC9 | chr19:51871195-51871195   | G | A | <i>CLDND2</i>  | NM_152353:exon2:c.C255T:p.C85C               | Silent            |               |
| VSCC9 | chr19:53352413-53352413   | T | C | <i>ZNF468</i>  | NM_001008801:exon3:c.A69G:p.K23K,ZNF468      | Silent            |               |
| VSCC9 | chr20:1145707-1145707     | G | A | <i>PSMF1</i>   | NM_006814:exon7:c.G799A:p.D267N,PSMF1        | Missense_Mutation |               |
| VSCC9 | chr20:4158099-4158099     | G | A | <i>SMOX</i>    | NM_001270691:exon3:c.G310A:p.D104N,SMOX      | Missense_Mutation | COSM4958453   |
| VSCC9 | chr20:9561029-9561029     | C | T | <i>PAK7</i>    | NM_177990:exon4:c.G753A:p.A251A,PAK7         | Silent            |               |
| VSCC9 | chr20:20257913-20257913   | G | A | <i>CFAP61</i>  | NM_015585:exon22:c.G2607A:p.P869P            | Silent            |               |
| VSCC9 | chr12:112891153-112891153 | G | A | <i>PTPN11</i>  | NM_002834:exon4:c.G487A:p.G163S,PTPN11       | Missense_Mutation | <i>PTPN11</i> |
| VSCC9 | chr20:34785884-34785884   | G | A | <i>EPB41L1</i> | NM_001258331:exon13:c.G1367A:p.R456Q,EPB41L1 | Missense_Mutation |               |
| VSCC9 | chr20:44757562-44757562   | C | T | <i>CD40</i>    | NM_001250:exon9:c.C717T:p.P239P              | Silent            |               |
| VSCC9 | chr20:57767771-57767771   | C | T | <i>ZNF831</i>  | NM_178457:exon1:c.C1697T:p.A566V             | Missense_Mutation |               |

|       |                         |   |   |                |                                            |                   |             |
|-------|-------------------------|---|---|----------------|--------------------------------------------|-------------------|-------------|
| VSCC9 | chr20:61429984-61429984 | G | A | <i>MRGBP</i>   | NM_018270:exon3:c.G316A:p.V106I            | Missense_Mutation |             |
| VSCC9 | chr20:62839440-62839440 | A | G | <i>MYT1</i>    | NM_004535:exon7:c.A891G:p.E297E            | Silent            | COSM5351866 |
| VSCC9 | chr21:38309300-38309300 | C | T | <i>HLCS</i>    | NM_000411:exon5:c.G445A:p.E149K,HLCS       | Missense_Mutation |             |
| VSCC9 | chr21:40627701-40627701 | G | A | <i>BRWD1</i>   | NM_018963:exon19:c.C2125T:p.R709C,BRWD1    | Missense_Mutation |             |
| VSCC9 | chr22:23503170-23503170 | A | G | <i>RAB36</i>   | NM_004914:exon10:c.A922G:p.N308D           | Missense_Mutation |             |
| VSCC9 | chr22:25294376-25294376 | C | T | <i>SGSM1</i>   | NM_001098498:exon18:c.C2277T:p.S759S,SGSM1 | Silent            |             |
| VSCC9 | chr22:28394685-28394685 | G | A | <i>TTC28</i>   | NM_001145418:exon16:c.C4962T:p.L1654L      | Silent            | COSM3773425 |
| VSCC9 | chr22:28426321-28426321 | C | T | <i>TTC28</i>   | NM_001145418:exon13:c.G3966A:p.A1322A      | Silent            | COSM3773426 |
| VSCC9 | chr22:29908072-29908072 | C | T | <i>THOC5</i>   | NM_001002879:exon18:c.G1735A:p.V579I,THOC5 | Missense_Mutation |             |
| VSCC9 | chr22:30762140-30762140 | G | A | <i>CCDC157</i> | NM_001017437:exon3:c.G151A:p.D51N          | Missense_Mutation |             |
| VSCC9 | chr22:38120965-38120965 | T | C | <i>TRIOBP</i>  | NM_001039141:exon7:c.T2402C:p.L801P        | Missense_Mutation |             |
| VSCC9 | chr22:39811558-39811558 | G | A | <i>TAB1</i>    | NM_006116:exon3:c.G224A:p.R75Q,TAB1        | Missense_Mutation |             |
| VSCC9 | chr22:43614316-43614316 | C | G | <i>SCUBE1</i>  | NM_173050:exon15:c.G1836C:p.A612A          | Silent            | COSM277581  |
| VSCC9 | chr22:45779372-45779372 | C | T | <i>SMC1B</i>   | NM_001291501:exon12:c.G2033A:p.R678Q,SMC1B | Missense_Mutation |             |
| VSCC9 | chrX:7177454-7177454    | C | T | <i>STS</i>     | NM_000351:exon5:c.C462T:p.H154H            | Silent            | COSM5914625 |
| VSCC9 | chrX:9656182-9656182    | G | A | <i>TBL1X</i>   | NM_001139467:exon6:c.G330A:p.A110A,TBL1X   | Silent            | COSM4727900 |
| VSCC9 | chrX:18912471-18912471  | G | A | <i>PHKA2</i>   | NM_000292:exon32:c.C3388T:p.R1130C         | Missense_Mutation |             |
| VSCC9 | chrX:21674083-21674083  | C | T | <i>KLHL34</i>  | NM_153270:exon1:c.G1824A:p.A608A           | Silent            |             |

|       |                          |   |   |              |                                            |                   |            |
|-------|--------------------------|---|---|--------------|--------------------------------------------|-------------------|------------|
| VSCC9 | chrX:24225504-24225504   | G | A | ZFX          | NM_001178086:exon2:c.G21A:p.S7S,ZFX        | Silent            |            |
| VSCC9 | chrX:29686599-29686599   | G | A | ILIRAPL1     | NM_014271:exon6:c.G756A:p.L252L            | Silent            |            |
| VSCC9 | chrX:37027956-37027956   | C | T | FAM47C       | NM_001013736:exon1:c.C1473T:p.P491P        | Silent            | COSM292906 |
| VSCC9 | chrX:55513412-55513412   | A | G | USP51        | NM_201286:exon2:c.T1961C:p.V654A           | Missense_Mutation |            |
| VSCC9 | chrX:88008632-88008632   | G | A | CPXCR1       | NM_001184771:exon3:c.G217A:p.E73K,CPXCR1   | Missense_Mutation |            |
| VSCC9 | chrX:90690776-90690776   | G | A | PABPC5       | NM_080832:exon2:c.G200A:p.R67H             | Missense_Mutation |            |
| VSCC9 | chrX:102755678-102755678 | C | T | RAB40A       | NM_080879:exon3:c.G7A:p.A3T                | Missense_Mutation |            |
| VSCC9 | chrX:124456399-124456399 | A | G | LOC100129520 | NM_001195272:exon1:c.A2431G:p.S811G        | Missense_Mutation |            |
| VSCC9 | chrX:129380893-129380893 | C | T | ZNF280C      | NM_017666:exon3:c.G118A:p.E40K             | Missense_Mutation |            |
| VSCC9 | chrX:132351471-132351471 | C | T | TFDP3        | NM_016521:exon1:c.G817A:p.D273N            | Missense_Mutation |            |
| VSCC9 | chrX:149641971-149641971 | C | T | MAMLD1       | NM_001177466:exon3:c.C1862T:p.A621V,MAMLD1 | Missense_Mutation |            |
| VSCC9 | chrX:153135670-153135670 | G | A | LICAM        | NM_001143963:exon7:c.C817T:p.R273C,LICAM   | Missense_Mutation |            |
| VSCC9 | chrX:153760659-153760659 | C | T | G6PD         | NM_000402:exon11:c.G1396A:p.A466T,G6PD     | Missense_Mutation |            |
| VSCC9 | chr6:128410991-128410991 | C | T | PTPRK        | NM_001291983:exon7:c.G922A:p.E308K,PTPRK   | Missense_Mutation | PTPRK      |
| VSCC9 | chr6:163987782-163987782 | G | A | QKI          | NM_001301085:exon7:c.G940A:p.D314N,QKI     | Missense_Mutation | QKI        |
| VSCC9 | chr17:78306280-78306280  | A | G | RNF213       | NM_001256071:exon21:c.A3992G:p.D1331G      | Missense_Mutation | RNF213     |
| VSCC9 | chr17:78306308-78306308  | C | G | RNF213       | NM_001256071:exon21:c.C4020G:p.V1340V      | Silent            | RNF213     |
| VSCC9 | chr17:78319136-78319136  | G | A | RNF213       | NM_001256071:exon29:c.G7001A:p.S2334N      | Missense_Mutation | RNF213     |

|        |                          |                                  |     |                 |                                                |                    |               |             |
|--------|--------------------------|----------------------------------|-----|-----------------|------------------------------------------------|--------------------|---------------|-------------|
| VSCC9  | chr9:131456941-131456941 | T                                | A   | <i>SET</i>      | NM_001122821:exon8:c.T871A:p.X291K,SET         | Nonsense_Mutation  | <i>SET</i>    | COSM148856  |
| VSCC9  | chr2:198257795-198257795 | T                                | C   | <i>SF3B1</i>    | NM_012433:exon24:c.A3657G:p.V1219V             | Silent             | <i>SF3B1</i>  |             |
| VSCC9  | chr2:198283305-198283305 | T                                | C   | <i>SF3B1</i>    | NM_012433:exon5:c.A423G:p.K141K                | Silent             | <i>SF3B1</i>  |             |
| VSCC9  | chr1:16258542-16258542   | G                                | A   | <i>SPEN</i>     | NM_015001:exon11:c.G5807A:p.R1936Q             | Missense_Mutation  | <i>SPEN</i>   |             |
| VSCC9  | chr1:16261684-16261684   | G                                | A   | <i>SPEN</i>     | NM_015001:exon11:c.G8949A:p.T2983T             | Silent             | <i>SPEN</i>   | COSM258388  |
| VSCC9  | chr9:93641151-93641151   | T                                | C   | <i>SYK</i>      | NM_001135052:exon10:c.T1428C:p.N476N,SYK       | Silent             | <i>SYK</i>    |             |
| VSCC9  | chr16:2106219-2106219    | C                                | T   | <i>TSC2</i>     | NM_000548:exon7:c.C622T:p.R208W,TSC2           | Missense_Mutation  | <i>TSC2</i>   |             |
| VSCC9  | chr1:209605637-209605648 | AGCAGCAG<br>CAGC                 | -   | <i>MIR205HG</i> | NM_001104548:exon4:c.252_263del:p.84_88del     | In_Frame_Deletion  |               |             |
| VSCC9  | chr19:18980054-18980054  | -                                | GCC | <i>GDF1</i>     | NM_001492:exon8:c.470_471insGGC:p.A157delinsAA | In_Frame_Insertion |               |             |
| VSCC9  | chr19:55869880-55869903  | GCTCCTTCA<br>TCTCGCCCC<br>ATGGCT | -   | <i>FAM71E2</i>  | NM_001145402:exon9:c.2333_2356del:p.778_786del | In_Frame_Deletion  |               | COSM3569482 |
| VSCC9  | chr20:21106714-21106714  | -                                | G   | <i>KIZ</i>      | UNKNOWN                                        | unknown            |               | COSM3574689 |
| VSCC10 | chr2:60688019-60688019   | G                                | A   | <i>BCL11A</i>   | NM_018014:exon4:c.C2028T:p.F676F,BCL11A        | Silent             | <i>BCL11A</i> |             |
| VSCC10 | chr14:99642095-99642095  | C                                | A   | <i>BCL11B</i>   | NM_001282238:exon3:c.G862T:p.A288S,BCL11B      | Missense_Mutation  | <i>BCL11B</i> |             |
| VSCC10 | chr7:2969662-2969662     | G                                | A   | <i>CARD11</i>   | NM_032415:exon12:c.C1617T:p.C539C              | Silent             | <i>CARD11</i> |             |
| VSCC10 | chr15:40916432-40916432  | G                                | C   | <i>CASC5</i>    | NM_144508:exon10:c.G3970C:p.D1324H,CASC5       | Missense_Mutation  | <i>CASC5</i>  | COSM3962542 |
| VSCC10 | chr15:40917695-40917695  | G                                | C   | <i>CASC5</i>    | NM_144508:exon10:c.G5233C:p.E1745Q,CASC5       | Missense_Mutation  | <i>CASC5</i>  |             |
| VSCC10 | chr17:37618494-37618494  | C                                | T   | <i>CDK12</i>    | NM_015083:exon1:c.C170T:p.T57I,CDK12           | Missense_Mutation  | <i>CDK12</i>  |             |
| VSCC10 | chr7:101870843-101870843 | C                                | T   | <i>CUX1</i>     | NM_001202543:exon21:c.C3360T:p.S1120S,CUX1     | Silent             | <i>CUX1</i>   |             |

|        |                           |   |   |                |                                             |                   |              |             |
|--------|---------------------------|---|---|----------------|---------------------------------------------|-------------------|--------------|-------------|
| VSCC10 | chr22:41574264-41574264   | G | A | <i>EP300</i>   | NM_001429:exon31:c.G6549A:p.L2183L          | Silent            | <i>EP300</i> | COSM3593535 |
| VSCC10 | chr17:73775020-73775020   | C | T | <i>H3F3B</i>   | NM_005324:exon3:c.G153A:p.E51E              | Silent            | <i>H3F3B</i> |             |
| VSCC10 | chr12:121437291-121437291 | C | T | <i>HNF1A</i>   | NM_000545:exon9:c.C1629T:p.F543F,HNF1A      | Silent            | <i>HNF1A</i> |             |
| VSCC10 | chr7:151860342-151860342  | C | G | <i>KMT2C</i>   | NM_170606:exon43:c.G10320C:p.E3440D         | Missense_Mutation | <i>KMT2C</i> |             |
| VSCC10 | chr11:95825407-95825407   | C | T | <i>MAML2</i>   | NM_032427:exon2:c.G1788A:p.Q596Q            | Silent            | <i>MAML2</i> | COSM5773514 |
| VSCC10 | chr2:24914466-24914466    | C | T | <i>NCOA1</i>   | NM_003743:exon7:c.C649T:p.R217C,NCOA1       | Missense_Mutation | <i>NCOA1</i> |             |
| VSCC10 | chr12:124835222-124835222 | G | A | <i>NCOR2</i>   | NM_001077261:exon29:c.C3725T:p.P1242L,NCOR2 | Missense_Mutation | <i>NCOR2</i> |             |
| VSCC10 | chr8:32621592-32621592    | A | G | <i>NRG1</i>    | NM_013957:exon12:c.A1586G:p.E529G,NRG1      | Missense_Mutation | <i>NRG1</i>  |             |
| VSCC10 | chr12:133219265-133219265 | C | G | <i>POLE</i>    | NM_006231:exon37:c.G4779C:p.L1593L          | Silent            | <i>POLE</i>  |             |
| VSCC10 | chr1:1118272-1118272      | C | G | <i>TTL10</i>   | NM_153254:exon7:c.C714G:p.I238M,TTL10       | Missense_Mutation |              | COSM4561370 |
| VSCC10 | chr1:3425703-3425703      | G | A | <i>MEGF6</i>   | NM_001409:exon12:c.C1464T:p.D488D           | Silent            |              | COSM5420203 |
| VSCC10 | chr1:9795145-9795145      | C | G | <i>CLSTN1</i>  | NM_001302883:exon13:c.G1914C:p.L638L,CLSTN1 | Silent            |              |             |
| VSCC10 | chr1:11595078-11595078    | C | T | <i>PTCHD2</i>  | NM_020780:exon19:c.C3546T:p.S1182S          | Silent            |              |             |
| VSCC10 | chr1:19181154-19181154    | G | A | <i>TAS1R2</i>  | NM_152232:exon3:c.C810T:p.R270R             | Silent            |              |             |
| VSCC10 | chr1:26189971-26189971    | G | C | <i>PAQR7</i>   | NM_178422:exon2:c.C360G:p.F120L             | Missense_Mutation |              |             |
| VSCC10 | chr1:27219019-27219019    | C | T | <i>GPATCH3</i> | NM_022078:exon6:c.G1244A:p.R415Q            | Missense_Mutation |              |             |
| VSCC10 | chr1:43779593-43779593    | G | A | <i>TIE1</i>    | NM_001253357:exon14:c.G2228A:p.R743K,TIE1   | Missense_Mutation |              |             |
| VSCC10 | chr1:53453713-53453713    | C | T | <i>SCP2</i>    | NM_001007098:exon10:c.C854T:p.T285M,SCP2    | Missense_Mutation |              |             |

|        |                          |   |   |                |                                           |                   |             |
|--------|--------------------------|---|---|----------------|-------------------------------------------|-------------------|-------------|
| VSCC10 | chr1:53716409-53716409   | C | T | <i>LRP8</i>    | NM_017522:exon15:c.G2017A:p.E673K,LRP8    | Missense_Mutation |             |
| VSCC10 | chr1:55509554-55509554   | G | A | <i>PCSK9</i>   | NM_174936:exon2:c.G246A:p.L82L            | Silent            | COSM1658914 |
| VSCC10 | chr1:60139740-60139740   | G | C | <i>FGGY</i>    | NM_001278224:exon8:c.G550C:p.E184Q,FGGY   | Missense_Mutation | COSM3392280 |
| VSCC10 | chr1:64936618-64936618   | C | T | <i>CACHD1</i>  | NM_020925:exon1:c.C38T:p.T13I             | Missense_Mutation |             |
| VSCC10 | chr1:76254867-76254867   | G | A | <i>RABGGTB</i> | NM_004582:exon3:c.G135A:p.L45L            | Silent            |             |
| VSCC10 | chr1:91731643-91731643   | G | A | <i>HFM1</i>    | NM_001017975:exon36:c.C3905T;p.S1302L     | Missense_Mutation |             |
| VSCC10 | chr1:94543341-94543341   | G | A | <i>ABCA4</i>   | NM_000350:exon11:c.C1459T:p.R487W         | Missense_Mutation |             |
| VSCC10 | chr1:104068762-104068762 | C | T | <i>RNPC3</i>   | NM_017619:exon1:c.C70T:p.R24W             | Missense_Mutation | COSM5648785 |
| VSCC10 | chr1:113059848-113059848 | G | A | <i>WNT2B</i>   | NM_001291880:exon4:c.G511A:p.D171N,WNT2B  | Missense_Mutation |             |
| VSCC10 | chr1:114444395-114444395 | G | A | <i>AP4B1</i>   | NM_001253852:exon3:c.C451T:p.H151Y,AP4B1  | Missense_Mutation |             |
| VSCC10 | chr1:150199042-150199042 | C | A | <i>ANP32E</i>  | NM_001136478:exon4:c.G456T:p.E152D,ANP32E | Missense_Mutation |             |
| VSCC10 | chr1:150199045-150199045 | T | C | <i>ANP32E</i>  | NM_001280560:exon4:c.A410G:p.K137R        | Missense_Mutation |             |
| VSCC10 | chr1:152284867-152284867 | G | A | <i>FLG</i>     | NM_002016:exon3:c.C2495T;p.S832L          | Missense_Mutation |             |
| VSCC10 | chr1:153333264-153333264 | G | A | <i>S100A9</i>  | NM_002965:exon3:c.G295A:p.E99K            | Missense_Mutation |             |
| VSCC10 | chr1:159783295-159783295 | G | A | <i>FCRL6</i>   | NM_001004310:exon7:c.G1026A;p.Q342Q,FCRL6 | Silent            |             |
| VSCC10 | chr1:162773288-162773288 | C | T | <i>HSD17B7</i> | NM_016371:exon6:c.C710T:p.P237L           | Missense_Mutation |             |
| VSCC10 | chr1:166826894-166826894 | C | T | <i>TADA1</i>   | NM_053053:exon8:c.G918A:p.T306T           | Silent            | COSM1060717 |
| VSCC10 | chr1:169435112-169435112 | G | A | <i>SLC19A2</i> | NM_006996:exon6:c.C1469T;p.S490L          | Missense_Mutation |             |

|        |                          |   |   |                |                                         |                   |             |
|--------|--------------------------|---|---|----------------|-----------------------------------------|-------------------|-------------|
| VSCC10 | chr1:169512109-169512109 | C | T | <i>F5</i>      | NM_000130:exon13:c.G2219A:p.R740Q       | Missense_Mutation | COSM1594968 |
| VSCC10 | chr1:173486813-173486813 | C | A | <i>SLC9C2</i>  | NM_178527:exon23:c.G2770T:p.E924X       | Nonsense_Mutation | COSM1310743 |
| VSCC10 | chr1:179461992-179461992 | G | A | <i>AXDND1</i>  | NM_144696:exon20:c.G2294A:p.C765Y       | Missense_Mutation |             |
| VSCC10 | chr1:182499419-182499419 | C | G | <i>RGSL1</i>   | NM_001137669:exon12:c.C2166G:p.I722M    | Missense_Mutation |             |
| VSCC10 | chr1:186273971-186273971 | C | T | <i>PRG4</i>    | NM_001127708:exon5:c.C392T:p.S131F,PRG4 | Missense_Mutation |             |
| VSCC10 | chr1:192627380-192627380 | G | C | <i>RGS13</i>   | NM_144766:exon5:c.G177C:p.E59D,RGS13    | Missense_Mutation |             |
| VSCC10 | chr1:196695661-196695661 | G | A | <i>CFH</i>     | NM_000186:exon13:c.G1935A:p.T645T       | Silent            |             |
| VSCC10 | chr1:197128599-197128599 | G | A | <i>ZBTB41</i>  | NM_194314:exon10:c.C2620T:p.R874X       | Nonsense_Mutation | COSM1252962 |
| VSCC10 | chr1:201618537-201618537 | C | T | <i>NAV1</i>    | NM_020443:exon1:c.C741T:p.L247L         | Silent            | COSM207540  |
| VSCC10 | chr1:211526592-211526592 | C | T | <i>TRAF5</i>   | NM_001033910:exon2:c.C11T:p.S4L,TRAF5   | Missense_Mutation |             |
| VSCC10 | chr1:222717463-222717463 | C | T | <i>HHIPL2</i>  | NM_024746:exon2:c.G390A:p.P130P         | Silent            |             |
| VSCC10 | chr1:230839970-230839970 | T | A | <i>AGT</i>     | NM_000029:exon4:c.A1238T:p.K413I        | Missense_Mutation |             |
| VSCC10 | chr1:243471383-243471383 | G | A | <i>SDCCAG8</i> | NM_006642:exon8:c.G833A:p.R278H         | Missense_Mutation |             |
| VSCC10 | chr1:247769068-247769068 | T | C | <i>OR2G3</i>   | NM_001001914:exon1:c.T181C:p.F61L       | Missense_Mutation |             |
| VSCC10 | chr2:1658266-1658266     | G | A | <i>PXDN</i>    | NM_012293:exon15:c.C1852T:p.R618X       | Nonsense_Mutation |             |
| VSCC10 | chr2:3523255-3523255     | C | T | <i>ADII</i>    | NM_018269:exon1:c.G4A:p.V2M             | Missense_Mutation |             |
| VSCC10 | chr2:7164647-7164647     | C | T | <i>RNF144A</i> | NM_014746:exon7:c.C657T:p.D219D         | Silent            |             |
| VSCC10 | chr2:20101480-20101480   | C | T | <i>TTC32</i>   | NM_001008237:exon1:c.G136A:p.E46K       | Missense_Mutation |             |



|        |                          |   |   |                |                                             |                   |             |
|--------|--------------------------|---|---|----------------|---------------------------------------------|-------------------|-------------|
| VSCC10 | chr2:24090720-24090720   | C | T | <i>ATAD2B</i>  | NM_001242338:exon10:c.G1173A:p.M391I,ATAD2B | Missense_Mutation |             |
| VSCC10 | chr2:26684977-26684977   | C | T | <i>OTOF</i>    | NM_194322:exon24:c.G3195A:p.E1065E,OTOF     | Silent            |             |
| VSCC10 | chr2:27802424-27802424   | G | A | <i>C2orf16</i> | NM_032266:exon1:c.G2985A:p.V995V            | Silent            | COSM1440360 |
| VSCC10 | chr2:54482989-54482989   | C | T | <i>TSPYL6</i>  | NM_001003937:exon1:c.G300A:p.A100A          | Silent            |             |
| VSCC10 | chr2:73677471-73677471   | G | A | <i>ALMS1</i>   | NM_015120:exon8:c.G3814A:p.D1272N           | Missense_Mutation |             |
| VSCC10 | chr2:73996400-73996400   | G | C | <i>DUSP11</i>  | NM_003584:exon5:c.C627G:p.L209L             | Silent            | COSM357901  |
| VSCC10 | chr2:135743788-135743788 | C | T | <i>MAP3K19</i> | NM_001018044:exon5:c.G2315A:p.R772Q,MAP3K19 | Missense_Mutation | COSM4877097 |
| VSCC10 | chr2:135988267-135988267 | C | T | <i>ZRANB3</i>  | NM_001286568:exon13:c.G1770A:p.S590S,ZRANB3 | Silent            | COSM1698601 |
| VSCC10 | chr2:135988288-135988288 | C | T | <i>ZRANB3</i>  | NM_001286568:exon13:c.G1749A:p.S583S,ZRANB3 | Silent            |             |
| VSCC10 | chr2:164467272-164467272 | G | C | <i>FIGN</i>    | NM_018086:exon3:c.C1070G:p.S357X            | Nonsense_Mutation |             |
| VSCC10 | chr2:166535272-166535272 | G | C | <i>CSRNP3</i>  | NM_024969:exon5:c.G767C:p.R256T,CSRNP3      | Missense_Mutation |             |
| VSCC10 | chr2:168102694-168102694 | G | A | <i>XIRP2</i>   | NM_001199144:exon7:c.G4126A:p.E1376K,XIRP2  | Missense_Mutation |             |
| VSCC10 | chr2:180308074-180308074 | G | A | <i>ZNF385B</i> | NM_001113397:exon8:c.C1091T:p.S364L,ZNF385B | Missense_Mutation |             |
| VSCC10 | chr2:201469460-201469460 | C | T | <i>AOX1</i>    | NM_001159:exon9:c.C711T:p.G237G             | Silent            |             |
| VSCC10 | chr2:204193297-204193297 | C | T | <i>ABI2</i>    | NM_001282925:exon1:c.C60T:p.F20F,ABI2       | Silent            |             |
| VSCC10 | chr2:206166376-206166376 | G | A | <i>PARD3B</i>  | NM_057177:exon17:c.G2374A:p.E792K,PARD3B    | Missense_Mutation | COSM4161724 |
| VSCC10 | chr2:233925301-233925301 | G | A | <i>INPP5D</i>  | UNKNOWN                                     | unknown           |             |
| VSCC10 | chr2:235950673-235950673 | G | A | <i>SH3BP4</i>  | NM_014521:exon4:c.G1260A:p.S420S            | Silent            |             |
| VSCC10 | chr3:30903220-30903220   | C | T | <i>GADL1</i>   | NM_207359:exon2:c.G75A:p.K25K               | Silent            |             |

|        |                          |   |   |                        |                                                  |                       |             |
|--------|--------------------------|---|---|------------------------|--------------------------------------------------|-----------------------|-------------|
| VSCC10 | chr3:32932003-32932003   | G | A | <i>TRIM71</i>          | NM_001039111:exon4:c.G1307A<br>:p.R436Q          | Missense_M<br>utation | COSM3878867 |
| VSCC10 | chr3:38739944-38739944   | C | T | <i>SCN10A</i>          | NM_001293307:exon26:c.G4473<br>A:p.A1491A,SCN10A | Silent                |             |
| VSCC10 | chr3:44351458-44351458   | G | T | <i>TOPAZ1</i>          | NM_001145030:exon16:c.G4282<br>T:p.D1428Y        | Missense_M<br>utation |             |
| VSCC10 | chr3:44856428-44856428   | G | A | <i>KIF15</i>           | NM_020242:exon20:c.G2409A:p.<br>L803L            | Silent                |             |
| VSCC10 | chr3:47889852-47889852   | G | A | <i>DHX30</i>           | NM_138615:exon15:c.G2469A:p.<br>A823A,DHX30      | Silent                |             |
| VSCC10 | chr3:49051341-49051341   | C | T | <i>WDR6</i>            | NM_018031:exon2:c.C2464T:p.<br>Q822X             | Nonsense_<br>Mutation | COSM1129607 |
| VSCC10 | chr3:50334777-50334777   | C | T | <i>NAT6</i>            | NM_001200016:exon2:c.G118A:<br>p.E40K,NAT6       | Missense_M<br>utation |             |
| VSCC10 | chr3:51430773-51430773   | C | T | <i>RBM15B</i>          | NM_013286:exon1:c.C1943T:p.S<br>648F             | Missense_M<br>utation |             |
| VSCC10 | chr3:69230613-69230613   | C | T | <i>FRMD4B</i>          | NM_015123:exon21:c.G2288A:p.<br>R763Q            | Missense_M<br>utation |             |
| VSCC10 | chr3:74535714-74535714   | A | G | <i>CNTN3</i>           | NM_020872:exon3:c.T251C:p.L8<br>4P               | Missense_M<br>utation | COSM3729414 |
| VSCC10 | chr3:78766461-78766461   | C | T | <i>ROBO1</i>           | NM_001145845:exon5:c.G764A:<br>p.R255Q,ROBO1     | Missense_M<br>utation |             |
| VSCC10 | chr3:113015660-113015660 | G | A | <i>CFAP44</i>          | NM_001164496:exon33:c.C5150<br>T:p.T1717M        | Missense_M<br>utation |             |
| VSCC10 | chr3:113252031-113252031 | G | A | <i>SIDT1</i>           | NM_001308350:exon1:c.G163A:<br>p.V55M,SIDT1      | Missense_M<br>utation |             |
| VSCC10 | chr3:126158490-126158490 | G | A | <i>ZXDC</i>            | NM_025112:exon9:c.C2475T:p.P<br>825P             | Silent                |             |
| VSCC10 | chr3:128853782-128853782 | C | T | <i>ISY1,ISY1-RAB43</i> | NM_001204890:exon8:c.G434A:<br>p.R145K,ISY1      | Missense_M<br>utation |             |
| VSCC10 | chr3:134079134-134079134 | A | G | <i>AMOTL2</i>          | NM_001278683:exon7:c.T1871C<br>:p.M624T,AMOTL2   | Missense_M<br>utation |             |
| VSCC10 | chr3:142753766-142753766 | C | T | <i>U2SURP</i>          | NM_001080415:exon19:c.C1890<br>T:p.L630L         | Silent                |             |
| VSCC10 | chr3:160083919-160083919 | G | A | <i>IFT80</i>           | NM_001190242:exon5:c.C50T:p.<br>A17V,IFT80       | Missense_M<br>utation |             |

|        |                          |   |   |                |                                             |                   |             |
|--------|--------------------------|---|---|----------------|---------------------------------------------|-------------------|-------------|
| VSCC10 | chr3:169820283-169820283 | G | A | <i>PHC3</i>    | NM_001308116:exon14:c.C2781T:p.F927F,PHC3   | Silent            | COSM1110561 |
| VSCC10 | chr3:172835147-172835147 | C | T | <i>SPATA16</i> | NM_031955:exon2:c.G375A:p.M125I             | Missense_Mutation |             |
| VSCC10 | chr3:183209837-183209837 | C | T | <i>KLHL6</i>   | NM_130446:exon7:c.G1744A:p.E582K            | Missense_Mutation |             |
| VSCC10 | chr3:191098713-191098713 | G | A | <i>CCDC50</i>  | NM_174908:exon8:c.G706A:p.E236K,CCDC50      | Missense_Mutation |             |
| VSCC10 | chr4:1824820-1824820     | G | A | <i>LETM1</i>   | NM_012318:exon9:c.C1371T:p.G457G            | Silent            | COSM3395496 |
| VSCC10 | chr4:8416033-8416033     | C | T | <i>ACOX3</i>   | NM_001101667:exon5:c.G529A:p.D177N,ACOX3    | Missense_Mutation |             |
| VSCC10 | chr4:10447128-10447128   | G | C | <i>ZNF518B</i> | NM_053042:exon3:c.C825G:p.I275M             | Missense_Mutation | COSM1105564 |
| VSCC10 | chr4:26741532-26741532   | G | T | <i>TBC1D19</i> | NM_001292054:exon14:c.G969T;p.Q323H,TBC1D19 | Missense_Mutation |             |
| VSCC10 | chr4:72413432-72413432   | T | G | <i>SLC4A4</i>  | NM_003759:exon17:c.T2557G:p.L853V,SLC4A4    | Missense_Mutation |             |
| VSCC10 | chr4:77662185-77662185   | G | A | <i>SHROOM3</i> | NM_020859:exon5:c.G2859A:p.A953A            | Silent            |             |
| VSCC10 | chr4:138450923-138450923 | G | A | <i>PCDH18</i>  | NM_001300828:exon1:c.C2320T;p.H774Y,PCDH18  | Missense_Mutation |             |
| VSCC10 | chr4:186381296-186381296 | C | G | <i>CCDC110</i> | NM_001145411:exon5:c.G334C:p.D112H,CCDC110  | Missense_Mutation |             |
| VSCC10 | chr4:186427755-186427755 | G | A | <i>PDLIM3</i>  | NM_001257963:exon3:c.C213T:p.H71H,PDLIM3    | Silent            |             |
| VSCC10 | chr5:21783593-21783593   | C | T | <i>CDH12</i>   | NM_001317227:exon8:c.G1267A;p.D423N,CDH12   | Missense_Mutation |             |
| VSCC10 | chr5:34937653-34937653   | C | T | <i>DNAJC21</i> | NM_001012339:exon5:c.C661T:p.R221X,DNAJC21  | Nonsense_Mutation |             |
| VSCC10 | chr5:45695947-45695947   | G | A | <i>HCN1</i>    | NM_021072:exon1:c.C249T:p.D83D              | Silent            |             |
| VSCC10 | chr5:90073801-90073801   | G | A | <i>ADGRV1</i>  | NM_032119:exon62:c.G12607A:p.E4203K         | Missense_Mutation |             |
| VSCC10 | chr5:132037846-132037846 | C | T | <i>KIF3A</i>   | NM_007054:exon13:c.G1736A:p.R579Q,KIF3A     | Missense_Mutation |             |

|        |                          |   |   |                 |                                              |                   |             |
|--------|--------------------------|---|---|-----------------|----------------------------------------------|-------------------|-------------|
| VSCC10 | chr5:140595913-140595913 | A | G | <i>PCDHB13</i>  | NM_018933:exon1:c.A2218G:p.S740G             | Missense_Mutation |             |
| VSCC10 | chr5:140739726-140739726 | C | T | <i>PCDHGB2</i>  | NM_018923:exon1:c.C24T:p.C8C,PCDHGB2         | Silent            |             |
| VSCC10 | chr5:140793096-140793096 | G | A | <i>PCDHGA10</i> | NM_018913:exon1:c.G354A:p.V118V,PCDHGA10     | Silent            |             |
| VSCC10 | chr5:140870350-140870350 | C | T | <i>PCDHGC5</i>  | NM_018929:exon1:c.C1543T:p.R515W,PCDHGC5     | Missense_Mutation | COSM4484300 |
| VSCC10 | chr5:150924288-150924288 | G | A | <i>FAT2</i>     | NM_001447:exon9:c.C6400T:p.Q2134X            | Nonsense_Mutation | COSM4737109 |
| VSCC10 | chr5:150925730-150925730 | G | A | <i>FAT2</i>     | NM_001447:exon9:c.C4958T:p.S1653L            | Missense_Mutation |             |
| VSCC10 | chr5:156916185-156916185 | G | A | <i>ADAM19</i>   | NM_033274:exon20:c.C2250T:p.F750F            | Silent            |             |
| VSCC10 | chr5:158630528-158630528 | G | A | <i>RNF145</i>   | NM_001199380:exon2:c.C188T:p.S63F,RNF145     | Missense_Mutation |             |
| VSCC10 | chr5:161113276-161113276 | T | G | <i>GABRA6</i>   | NM_000811:exon2:c.T79G:p.F27V                | Missense_Mutation |             |
| VSCC10 | chr5:162945299-162945299 | G | A | <i>MAT2B</i>    | NM_013283:exon7:c.G935A:p.R312Q,MAT2B        | Missense_Mutation |             |
| VSCC10 | chr5:178770786-178770786 | G | A | <i>ADAMTS2</i>  | NM_014244:exon2:c.C516T:p.L172L,ADAMTS2      | Silent            |             |
| VSCC10 | chr6:7605715-7605715     | G | A | <i>SNRNP48</i>  | NM_152551:exon7:c.G802A:p.E268K              | Missense_Mutation |             |
| VSCC10 | chr6:25495413-25495413   | C | G | <i>LRRC16A</i>  | NM_001173977:exon16:c.C1295G:p.S432X,LRRC16A | Nonsense_Mutation |             |
| VSCC10 | chr6:31105904-31105904   | T | C | <i>PSORS1C2</i> | NM_014069:exon2:c.A235G:p.T79A               | Missense_Mutation | COSM5676772 |
| VSCC10 | chr6:43139758-43139758   | G | A | <i>SRF</i>      | NM_003131:exon1:c.G364A:p.G122R              | Missense_Mutation |             |
| VSCC10 | chr6:101095286-101095286 | C | T | <i>ASCC3</i>    | NM_006828:exon21:c.G3294A:p.L1098L           | Silent            | COSM3998842 |
| VSCC10 | chr6:116381157-116381157 | A | C | <i>FRK</i>      | NM_002031:exon1:c.T318G:p.A106A              | Silent            |             |
| VSCC10 | chr6:119345279-119345279 | G | A | <i>FAM184A</i>  | NM_001100411:exon2:c.C499T:p.L167F,FAM184A   | Missense_Mutation |             |

|        |                          |   |   |                |                                              |                   |             |
|--------|--------------------------|---|---|----------------|----------------------------------------------|-------------------|-------------|
| VSCC10 | chr6:150710624-150710624 | C | T | <i>IYD</i>     | NM_001164694:exon2:c.C315T:p.F105F,IYD       | Silent            |             |
| VSCC10 | chr7:938885-938885       | C | T | <i>ADAP1</i>   | NM_001284311:exon8:c.G596A:p.R199Q,ADAP1     | Missense_Mutation |             |
| VSCC10 | chr7:2515570-2515570     | C | T | <i>GRIFIN</i>  | UNKNOWN                                      | unknown           |             |
| VSCC10 | chr7:5104275-5104275     | G | A | <i>RBAK</i>    | NM_021163:exon5:c.G1188A:p.T396T,RBAK        | Silent            |             |
| VSCC10 | chr7:27135260-27135260   | G | A | <i>HOXA1</i>   | NM_005522:exon1:c.C272T:p.S91F,HOXA1         | Missense_Mutation |             |
| VSCC10 | chr7:27140580-27140580   | G | A | <i>HOXA2</i>   | NM_006735:exon2:c.C896T:p.S299L              | Missense_Mutation |             |
| VSCC10 | chr7:30538451-30538451   | C | T | <i>GGCT</i>    | NM_024051:exon3:c.G391A:p.E131K              | Missense_Mutation |             |
| VSCC10 | chr7:41729682-41729682   | C | T | <i>INHBA</i>   | NM_002192:exon3:c.G847A:p.E283K              | Missense_Mutation | COSM5008391 |
| VSCC10 | chr7:99956672-99956672   | A | T | <i>PILRB</i>   | NM_178238:exon2:c.A424T:p.I142F              | Missense_Mutation |             |
| VSCC10 | chr7:100385560-100385560 | C | T | <i>ZAN</i>     | UNKNOWN                                      | unknown           |             |
| VSCC10 | chr7:100459468-100459468 | G | A | <i>SLC12A9</i> | NM_001267814:exon10:c.G1379A:p.R460Q,SLC12A9 | Missense_Mutation |             |
| VSCC10 | chr7:100550827-100550827 | T | A | <i>MUC3A</i>   | NM_005960:exon2:c.T1408A:p.F470I             | Missense_Mutation |             |
| VSCC10 | chr7:100550990-100550990 | C | T | <i>MUC3A</i>   | NM_005960:exon2:c.C1571T:p.S524L             | Missense_Mutation |             |
| VSCC10 | chr7:108212353-108212353 | G | A | <i>DNAJB9</i>  | NM_012328:exon2:c.G183A:p.P61P               | Silent            |             |
| VSCC10 | chr7:108524207-108524207 | G | C | <i>C7orf66</i> | NM_001024607:exon2:c.C205G:p.Q69E            | Missense_Mutation | COSM432081  |
| VSCC10 | chr7:112579712-112579712 | C | G | <i>C7orf60</i> | NM_152556:exon1:c.G94C:p.E32Q                | Missense_Mutation |             |
| VSCC10 | chr7:133682246-133682246 | G | A | <i>EXOC4</i>   | NM_021807:exon15:c.G2208A:p.M736I            | Missense_Mutation |             |
| VSCC10 | chr7:142561853-142561853 | G | A | <i>EPHB6</i>   | NM_004445:exon4:c.G295A:p.G99R               | Missense_Mutation |             |
| VSCC10 | chr7:149422484-149422484 | C | T | <i>KRBA1</i>   | UNKNOWN                                      | unknown           |             |
| VSCC10 | chr7:150878484-150878484 | C | T | <i>ASB10</i>   | NM_001142459:exon3:c.G646A:p.E216K,ASB10     | Missense_Mutation |             |

|        |                          |   |   |                 |                                             |                   |             |
|--------|--------------------------|---|---|-----------------|---------------------------------------------|-------------------|-------------|
| VSCC10 | chr7:150878513-150878513 | C | G | <i>ASB10</i>    | NM_001142459:exon3:c.G617C:p.R206T,ASB10    | Missense_Mutation |             |
| VSCC10 | chr8:17916919-17916919   | C | T | <i>ASAH1</i>    | NM_001127505:exon12:c.G954A:p.W318X,ASAH1   | Nonsense_Mutation |             |
| VSCC10 | chr8:38110553-38110553   | C | T | <i>DDHD2</i>    | NM_001164232:exon15:c.C1799T:p.S600F,DDHD2  | Missense_Mutation |             |
| VSCC10 | chr8:39080727-39080727   | G | A | <i>ADAM32</i>   | NM_001313994:exon11:c.G1198A:p.D400N,ADAM32 | Missense_Mutation |             |
| VSCC10 | chr8:39466580-39466580   | T | G | <i>ADAM18</i>   | NM_001190956:exon4:c.T208G:p.F70V,ADAM18    | Missense_Mutation |             |
| VSCC10 | chr8:75929571-75929571   | G | A | <i>CRISPLD1</i> | NM_001286777:exon8:c.G455A:p.R152K,CRISPLD1 | Missense_Mutation | COSM958546  |
| VSCC10 | chr8:86050700-86050700   | G | A | <i>LRRCC1</i>   | NM_033402:exon17:c.G2830A:p.E944K           | Missense_Mutation | COSM5008394 |
| VSCC10 | chr8:95504037-95504037   | C | T | <i>KIAA1429</i> | NM_015496:exon22:c.G4909A:p.D1637N          | Missense_Mutation | COSM1128336 |
| VSCC10 | chr8:98943279-98943279   | G | A | <i>MATN2</i>    | NM_002380:exon3:c.G241A:p.V81M,MATN2        | Missense_Mutation |             |
| VSCC10 | chr8:134025859-134025859 | G | T | <i>TG</i>       | NM_003235:exon37:c.G6412T:p.E2138X          | Nonsense_Mutation |             |
| VSCC10 | chr8:145623746-145623746 | C | G | <i>CPSF1</i>    | NM_013291:exon19:c.G1840C:p.D614H           | Missense_Mutation |             |
| VSCC10 | chr9:35704705-35704705   | C | T | <i>TLN1</i>     | NM_006289:exon44:c.G5841A:p.K1947K          | Silent            |             |
| VSCC10 | chr9:35906562-35906562   | C | A | <i>HRCT1</i>    | NM_001039792:exon1:c.C278A:p.P93H           | Missense_Mutation |             |
| VSCC10 | chr9:85615940-85615940   | G | A | <i>RASEF</i>    | NM_152573:exon10:c.C1308T:p.F436F           | Silent            |             |
| VSCC10 | chr9:86243837-86243837   | G | A | <i>IDNK</i>     | NM_001001551:exon3:c.G131A:p.R44Q           | Missense_Mutation |             |
| VSCC10 | chr9:86571232-86571232   | C | T | <i>C9orf64</i>  | NM_032307:exon1:c.G184A:p.E62K              | Missense_Mutation | COSM4907748 |
| VSCC10 | chr9:103348704-103348704 | C | G | <i>MURC</i>     | NM_001018116:exon2:c.C1066G:p.L356V         | Missense_Mutation |             |
| VSCC10 | chr9:114180285-114180285 | G | A | <i>KIAA0368</i> | NM_001080398:exon18:c.C2095T:p.R699C        | Missense_Mutation | COSM148366  |

|        |                           |   |   |                         |                                           |                   |             |
|--------|---------------------------|---|---|-------------------------|-------------------------------------------|-------------------|-------------|
| VSCC10 | chr9:124079421-124079421  | G | A | <i>GSN</i>              | NM_000177:exon7:c.G964A:p.A322T,GSN       | Missense_Mutation |             |
| VSCC10 | chr9:131186871-131186871  | C | T | <i>CERCAM</i>           | NM_001286760:exon5:c.C510T:p.F170F,CERCAM | Silent            | COSM4416695 |
| VSCC10 | chr9:138713971-138713971  | C | T | <i>CAMSAP1</i>          | NM_015447:exon11:c.G2536A:p.E846K         | Missense_Mutation |             |
| VSCC10 | chr10:1279651-1279651     | C | T | <i>ADARB2</i>           | NM_018702:exon6:c.G1498A:p.E500K          | Missense_Mutation | COSM5734851 |
| VSCC10 | chr10:17632368-17632368   | C | G | <i>HACD1</i>            | NM_014241:exon7:c.G862C:p.D288H           | Missense_Mutation | COSM3887635 |
| VSCC10 | chr10:22615385-22615385   | C | G | <i>BMI1,COMMD3-BMI1</i> | NM_005180:exon2:c.C7G:p.R3G,COMMD3-BMI1   | Missense_Mutation |             |
| VSCC10 | chr10:61846511-61846511   | C | T | <i>ANK3</i>             | NM_001149:exon8:c.G1074A:p.P358P,ANK3     | Silent            |             |
| VSCC10 | chr10:83635818-83635818   | C | T | <i>NRG3</i>             | NM_001010848:exon1:c.C722T:p.S241F,NRG3   | Missense_Mutation |             |
| VSCC10 | chr10:104183868-104183868 | G | A | <i>CUEDC2</i>           | NM_024040:exon6:c.C479T:p.S160L           | Missense_Mutation |             |
| VSCC10 | chr10:118396354-118396354 | A | C | <i>PNLIPRP2</i>         | UNKNOWN                                   | unknown           |             |
| VSCC10 | chr10:134682855-134682855 | C | T | <i>CFAP46</i>           | NM_001200049:exon33:c.G4533A:p.E1511E     | Silent            |             |
| VSCC10 | chr10:135000170-135000170 | G | A | <i>KNDC1</i>            | NM_152643:exon6:c.G1318A:p.A440T          | Missense_Mutation | COSM5493392 |
| VSCC10 | chr11:4673799-4673799     | T | G | <i>OR51E1</i>           | NM_152430:exon2:c.T43G:p.F15V             | Missense_Mutation |             |
| VSCC10 | chr11:5020365-5020365     | T | C | <i>OR51L1</i>           | NM_001004755:exon1:c.T153C:p.I51I         | Silent            |             |
| VSCC10 | chr11:6644242-6644242     | G | A | <i>DCHS1</i>            | NM_003737:exon21:c.C8665T:p.R2889W        | Missense_Mutation |             |
| VSCC10 | chr11:7846715-7846715     | C | T | <i>OR5P3</i>            | NM_153445:exon1:c.G805A:p.D269N           | Missense_Mutation |             |
| VSCC10 | chr11:26681838-26681838   | C | T | <i>ANO3</i>             | NM_001313727:exon24:c.C2355T:p.I785I,ANO3 | Silent            |             |
| VSCC10 | chr11:43513630-43513630   | G | A | <i>TTC17</i>            | NM_018259:exon23:c.G3211A:p.V107II        | Missense_Mutation | COSM3512689 |
| VSCC10 | chr11:46406951-46406951   | C | T | <i>CHRM4</i>            | NM_000741:exon1:c.G1157A:p.R386H          | Missense_Mutation |             |

|        |                           |   |   |                 |                                                 |                       |             |
|--------|---------------------------|---|---|-----------------|-------------------------------------------------|-----------------------|-------------|
| VSCC10 | chr11:46726515-46726515   | G | A | <i>ZNF408</i>   | NM_001184751:exon5:c.G1241A<br>:p.R414Q,ZNF408  | Missense_M<br>utation |             |
| VSCC10 | chr11:55433271-55433271   | T | G | <i>OR4C6</i>    | NM_001004704:exon1:c.T629G:<br>p.L210R          | Missense_M<br>utation |             |
| VSCC10 | chr11:57505867-57505867   | G | C | <i>TMX2</i>     | NM_001144012:exon3:c.G292C:<br>p.E98Q,TMX2      | Missense_M<br>utation | COSM4871011 |
| VSCC10 | chr11:59368328-59368328   | G | A | <i>OSBP</i>     | NM_002556:exon6:c.C1143T:p.I<br>381I            | Silent                |             |
| VSCC10 | chr11:64074912-64074912   | C | T | <i>ESRRA</i>    | NM_001282450:exon2:c.C261T:<br>p.S87S,ESRRA     | Silent                |             |
| VSCC10 | chr11:67201476-67201476   | G | A | <i>RPS6KB2</i>  | NM_003952:exon11:c.G917A:p.<br>R306Q            | Missense_M<br>utation | COSM5953790 |
| VSCC10 | chr11:71942606-71942606   | G | A | <i>INPPL1</i>   | NM_001567:exon13:c.G1562A:p.<br>R521H           | Missense_M<br>utation |             |
| VSCC10 | chr11:103270525-103270525 | C | T | <i>DYNC2H1</i>  | NM_001377:exon84:c.C12291T:<br>p.L4097L,DYNC2H1 | Silent                |             |
| VSCC10 | chr12:52886911-52886911   | T | C | <i>KRT6A</i>    | NM_005554:exon1:c.A62G:p.N2<br>1S               | Missense_M<br>utation |             |
| VSCC10 | chr12:55688401-55688401   | C | T | <i>OR6C6</i>    | NM_001005493:exon1:c.G616A:<br>p.V206M          | Missense_M<br>utation |             |
| VSCC10 | chr12:80771705-80771705   | C | A | <i>OTOGL</i>    | NM_173591:exon58:c.C6912A:p.<br>F2304L          | Missense_M<br>utation | COSM3757859 |
| VSCC10 | chr12:112670876-112670876 | G | A | <i>HECTD4</i>   | NM_001109662:exon38:c.C5527<br>T:p.R1843W       | Missense_M<br>utation | COSM1129389 |
| VSCC10 | chr12:117672466-117672466 | C | T | <i>NOS1</i>     | NM_001204213:exon20:c.G2131<br>A:p.D711N,NOS1   | Missense_M<br>utation | COSM4066073 |
| VSCC10 | chr12:120796816-120796816 | C | T | <i>MSH1</i>     | NM_002442:exon7:c.G443A:p.R<br>148Q             | Missense_M<br>utation | COSM3517247 |
| VSCC10 | chr12:122716811-122716811 | C | T | <i>VPS33A</i>   | NM_022916:exon13:c.G1773A:p.<br>L591L           | Silent                |             |
| VSCC10 | chr12:123285796-123285796 | C | T | <i>CCDC62</i>   | NM_201435:exon9:c.C1103T:p.S<br>368L            | Missense_M<br>utation | COSM5448982 |
| VSCC10 | chr13:20220615-20220615   | G | A | <i>MPHOSPH8</i> | NM_017520:exon3:c.G402A:p.A<br>134A             | Silent                |             |
| VSCC10 | chr13:28366975-28366975   | C | T | <i>GSX1</i>     | NM_145657:exon1:c.C148T:p.R5<br>0C              | Missense_M<br>utation |             |



|        |                           |   |   |                |                                             |                   |             |
|--------|---------------------------|---|---|----------------|---------------------------------------------|-------------------|-------------|
| VSCC10 | chr13:31205486-31205486   | C | T | <i>USPL1</i>   | NM_005800:exon4:c.C743T:p.S248L             | Missense_Mutation |             |
| VSCC10 | chr13:45147491-45147491   | C | G | <i>TSC22D1</i> | NM_183422:exon1:c.G2720C:p.G907A            | Missense_Mutation |             |
| VSCC10 | chr13:46559752-46559752   | C | T | <i>ZC3H13</i>  | NM_015070:exon10:c.G1400A:p.R467Q           | Missense_Mutation |             |
| VSCC10 | chr13:58240881-58240881   | C | T | <i>PCDH17</i>  | NM_001040429:exon3:c.C2711T;p.T904I         | Missense_Mutation |             |
| VSCC10 | chr13:103701763-103701763 | C | T | <i>SLC10A2</i> | NM_000452:exon5:c.G795A:p.Q265Q             | Silent            |             |
| VSCC10 | chr13:109535450-109535450 | C | T | <i>MYO16</i>   | NM_001198950:exon13:c.C1469T;p.S490L,MYO16  | Missense_Mutation |             |
| VSCC10 | chr13:111287048-111287048 | G | A | <i>CARKD</i>   | NM_001242883:exon4:c.G246A:p.P82P,CARKD     | Silent            |             |
| VSCC10 | chr14:24787936-24787936   | G | A | <i>ADCY4</i>   | NM_001198568:exon24:c.C3005T;p.P1002L,ADCY4 | Missense_Mutation |             |
| VSCC10 | chr14:55468813-55468813   | G | A | <i>WDHD1</i>   | NM_001008396:exon7:c.C322T;p.Q108X,WDHD1    | Nonsense_Mutation |             |
| VSCC10 | chr14:60213086-60213086   | C | T | <i>RTN1</i>    | NM_021136:exon2:c.G355A:p.D119N             | Missense_Mutation |             |
| VSCC10 | chr14:60213087-60213087   | C | T | <i>RTN1</i>    | NM_021136:exon2:c.G354A:p.E118E             | Silent            |             |
| VSCC10 | chr14:63246455-63246455   | C | T | <i>KCNH5</i>   | NM_139318:exon10:c.G2010A:p.L670L           | Silent            |             |
| VSCC10 | chr14:65239387-65239387   | C | T | <i>SPTB</i>    | NM_000347:exon25:c.G5464A:p.E1822K,SPTB     | Missense_Mutation | COSM245619  |
| VSCC10 | chr14:70924551-70924551   | A | G | <i>ADAM21</i>  | NM_003813:exon2:c.A335G:p.H112R             | Missense_Mutation |             |
| VSCC10 | chr14:86089542-86089542   | T | C | <i>FLRT2</i>   | NM_013231:exon2:c.T1684C:p.F562L            | Missense_Mutation |             |
| VSCC10 | chr14:89171223-89171223   | G | A | <i>EML5</i>    | NM_183387:exon13:c.C2032T;p.R678X           | Nonsense_Mutation | COSM3530413 |
| VSCC10 | chr14:100728720-100728720 | A | G | <i>YY1</i>     | NM_003403:exon2:c.A759G:p.E253E             | Silent            |             |
| VSCC10 | chr14:100728769-100728769 | C | A | <i>YY1</i>     | NM_003403:exon2:c.C808A:p.L270I             | Missense_Mutation | COSM4975827 |

|        |                           |   |   |                 |                                                    |                       |             |
|--------|---------------------------|---|---|-----------------|----------------------------------------------------|-----------------------|-------------|
| VSCC10 | chr14:100728770-100728770 | T | G | <i>YY1</i>      | NM_003403:exon2:c.T809G:p.L2<br>70R                | Missense_M<br>utation | COSM997272  |
| VSCC10 | chr14:102028445-102028445 | C | T | <i>DIO3</i>     | UNKNOWN                                            | unknown               |             |
| VSCC10 | chr14:103395538-103395538 | G | A | <i>AMN</i>      | NM_030943:exon6:c.G594A:p.L<br>198L                | Silent                |             |
| VSCC10 | chr14:105406145-105406145 | C | T | <i>AHNAK2</i>   | NM_138420:exon7:c.G15643A:p.<br>V5215M             | Missense_M<br>utation |             |
| VSCC10 | chr14:105858975-105858975 | C | T | <i>PACS2</i>    | NM_001243127:exon22:c.C2005<br>T:p.L669L,PACS2     | Silent                |             |
| VSCC10 | chr15:24923500-24923500   | C | T | <i>NPAPI</i>    | NM_018958:exon1:c.C2486T:p.P<br>829L               | Missense_M<br>utation |             |
| VSCC10 | chr15:28369270-28369270   | G | A | <i>HERC2</i>    | NM_004667:exon85:c.C13101T:<br>p.F4367F            | Silent                |             |
| VSCC10 | chr15:34395480-34395480   | G | A | <i>PGBD4</i>    | NM_152595:exon1:c.G748A:p.D<br>250N                | Missense_M<br>utation | COSM1002538 |
| VSCC10 | chr15:42977676-42977676   | G | A | <i>STARD9</i>   | NM_020759:exon23:c.G3900A:p.<br>Q1300Q             | Silent                |             |
| VSCC10 | chr15:45059562-45059562   | G | C | <i>TRIM69</i>   | NM_001301146:exon5:c.G384C:<br>p.V128V,TRIM69      | Silent                | COSM3972432 |
| VSCC10 | chr15:72143652-72143652   | C | G | <i>MYO9A</i>    | NM_006901:exon37:c.G6523C:p.<br>D2175H             | Missense_M<br>utation |             |
| VSCC10 | chr15:84690343-84690343   | G | A | <i>ADAMTSL3</i> | NM_001301110:exon26:c.G4455<br>A:p.A1485A,ADAMTSL3 | Silent                |             |
| VSCC10 | chr15:86124199-86124199   | C | T | <i>AKAP13</i>   | NM_006738:exon7:c.C2900T:p.S<br>967L,AKAP13        | Missense_M<br>utation |             |
| VSCC10 | chr15:86261282-86261282   | G | A | <i>AKAP13</i>   | NM_001270546:exon14:c.G1756<br>A:p.E586K,AKAP13    | Missense_M<br>utation |             |
| VSCC10 | chr15:93015381-93015381   | G | A | <i>C15orf32</i> | NM_001301106:exon1:c.G3A:p.<br>M1I,C15orf32        | Missense_M<br>utation |             |
| VSCC10 | chr16:839665-839665       | G | A | <i>CHTF18</i>   | NM_022092:exon4:c.G556A:p.V<br>186I                | Missense_M<br>utation |             |
| VSCC10 | chr16:7721572-7721572     | G | C | <i>RBFOX1</i>   | NM_145891:exon10:c.G964C:p.<br>E322Q,RBFOX1        | Missense_M<br>utation |             |
| VSCC10 | chr16:10864146-10864146   | C | G | <i>TVP23A</i>   | NM_001079512:exon7:c.G625C:<br>p.E209Q             | Missense_M<br>utation | COSM1246153 |
| VSCC10 | chr16:19718443-19718443   | G | A | <i>KNOPI</i>    | NM_001012991:exon5:c.C1166T<br>:p.S389L            | Missense_M<br>utation |             |

|        |                         |   |   |                 |                                             |                   |             |
|--------|-------------------------|---|---|-----------------|---------------------------------------------|-------------------|-------------|
| VSCC10 | chr16:56904076-56904076 | G | T | <i>SLC12A3</i>  | NM_000339:exon5:c.G670T:p.A224S,SLC12A3     | Missense_Mutation |             |
| VSCC10 | chr16:66643809-66643809 | C | T | <i>CMTM3</i>    | NM_181553:exon4:c.C423T:p.II41I,CMTM3       | Silent            |             |
| VSCC10 | chr16:68598462-68598462 | G | A | <i>ZFP90</i>    | NM_001305203:exon5:c.G1772A:p.R591Q,ZFP90   | Missense_Mutation | COSM5519797 |
| VSCC10 | chr16:68893864-68893864 | G | T | <i>TANGO6</i>   | NM_024562:exon2:c.G172T:p.E58X              | Nonsense_Mutation | COSM1033448 |
| VSCC10 | chr16:81253837-81253837 | G | A | <i>PKDIL2</i>   | NM_001076780:exon1:c.C139T:p.R47C           | Missense_Mutation | COSM268520  |
| VSCC10 | chr16:81712087-81712087 | G | A | <i>CMIP</i>     | NM_030629:exon10:c.G960A:p.P320P,CMIP       | Silent            | COSM1034584 |
| VSCC10 | chr17:2601656-2601656   | C | T | <i>CLUH</i>     | NM_015229:exon10:c.G1381A:p.A461T           | Missense_Mutation |             |
| VSCC10 | chr17:3635727-3635727   | G | A | <i>ITGAE</i>    | NM_002208:exon22:c.C2689T:p.Q897X           | Nonsense_Mutation |             |
| VSCC10 | chr17:4098277-4098277   | C | T | <i>ANKFY1</i>   | NM_001257999:exon10:c.G1494A:p.A498A,ANKFY1 | Silent            |             |
| VSCC10 | chr17:7405903-7405903   | G | A | <i>POLR2A</i>   | NM_000937:exon16:c.G2639A:p.R880Q           | Missense_Mutation |             |
| VSCC10 | chr17:7801373-7801373   | G | A | <i>CHD3</i>     | NM_001005271:exon12:c.G2181A:p.M727I,CHD3   | Missense_Mutation |             |
| VSCC10 | chr17:10304905-10304905 | C | G | <i>MYH8</i>     | NM_002472:exon23:c.G2886C:p.L962L           | Silent            |             |
| VSCC10 | chr17:10316014-10316014 | C | G | <i>MYH8</i>     | NM_002472:exon13:c.G1179C:p.L393L           | Silent            |             |
| VSCC10 | chr17:17394792-17394792 | G | A | <i>MED9</i>     | NM_018019:exon2:c.G424A:p.E142K             | Missense_Mutation |             |
| VSCC10 | chr17:21081597-21081597 | G | A | <i>DHRS7B</i>   | NM_015510:exon3:c.G251A:p.R84Q              | Missense_Mutation |             |
| VSCC10 | chr17:27371970-27371970 | G | A | <i>PIPOX</i>    | NM_016518:exon2:c.G208A:p.E70K              | Missense_Mutation |             |
| VSCC10 | chr17:38176148-38176148 | G | A | <i>MED24</i>    | NM_001079518:exon24:c.C2704T:p.R902C,MED24  | Missense_Mutation | COSM5003252 |
| VSCC10 | chr17:39296563-39296563 | G | A | <i>KRTAP4-6</i> | NM_030976:exon1:c.C177T:p.T59T              | Silent            |             |

|        |                         |   |   |                 |                                               |                   |           |
|--------|-------------------------|---|---|-----------------|-----------------------------------------------|-------------------|-----------|
| VSCC10 | chr17:40665987-40665987 | G | A | <i>ATP6V0A1</i> | NM_001130020:exon19:c.G2242A:p.A748T,ATP6V0A1 | Missense_Mutation |           |
| VSCC10 | chr17:40689506-40689506 | G | A | <i>NAGLU</i>    | NM_000263:exon2:c.G474A:p.A158A               | Silent            |           |
| VSCC10 | chr17:66397558-66397558 | C | T | <i>ARSG</i>     | NM_001267727:exon11:c.C1270T:p.R424C,ARSG     | Missense_Mutation |           |
| VSCC10 | chr17:79139763-79139763 | G | A | <i>AATK</i>     | NM_001080395:exon1:c.C30T:p.F10F              | Silent            | COSM94440 |
| VSCC10 | chr17:80016084-80016084 | C | T | <i>DUSIL</i>    | NM_022156:exon14:c.G1329A:p.W443X             | Nonsense_Mutation |           |
| VSCC10 | chr18:7023266-7023266   | G | A | <i>LAMA1</i>    | NM_005559:exon19:c.C2598T:p.V866V             | Silent            |           |
| VSCC10 | chr18:29444631-29444631 | G | A | <i>TRAPPC8</i>  | NM_014939:exon19:c.C2704T:p.R902C             | Missense_Mutation |           |
| VSCC10 | chr18:31324450-31324450 | A | T | <i>ASXL3</i>    | NM_030632:exon12:c.A4638T:p.K1546N            | Missense_Mutation |           |
| VSCC10 | chr18:32335980-32335980 | G | A | <i>DTNA</i>     | NM_001390:exon1:c.G40A:p.E14K,DTNA            | Missense_Mutation |           |
| VSCC10 | chr18:40851779-40851779 | C | T | <i>SYT4</i>     | NM_020783:exon3:c.G868A:p.E290K               | Missense_Mutation |           |
| VSCC10 | chr18:65179181-65179181 | C | T | <i>DSEL</i>     | NM_032160:exon2:c.G2695A:p.D899N              | Missense_Mutation |           |
| VSCC10 | chr19:1122731-1122731   | G | A | <i>SBNO2</i>    | NM_001100122:exon6:c.C669T:p.A223A,SBNO2      | Silent            |           |
| VSCC10 | chr19:4950771-4950771   | G | A | <i>UHRF1</i>    | UNKNOWN                                       | unknown           |           |
| VSCC10 | chr19:5687962-5687962   | G | T | <i>HSD11B1L</i> | NM_001267870:exon5:c.G532T:p.G178W,HSD11B1L   | Missense_Mutation |           |
| VSCC10 | chr19:5892991-5892991   | C | T | <i>NDUFA11</i>  | NM_001193375:exon4:c.G624A:p.L208L            | Silent            |           |
| VSCC10 | chr19:7593570-7593570   | G | A | <i>MCOLN1</i>   | NM_020533:exon8:c.G965A:p.R322Q               | Missense_Mutation |           |
| VSCC10 | chr19:9056399-9056399   | A | T | <i>MUC16</i>    | NM_024690:exon3:c.T31047A:p.H10349Q           | Missense_Mutation |           |
| VSCC10 | chr19:9065350-9065350   | C | G | <i>MUC16</i>    | NM_024690:exon3:c.G22096C:p.E7366Q            | Missense_Mutation |           |
| VSCC10 | chr19:17720841-17720841 | G | A | <i>UNC13A</i>   | NM_001080421:exon41:c.C4719T:p.I1573I         | Silent            |           |

|        |                         |   |   |                 |                                            |                   |             |
|--------|-------------------------|---|---|-----------------|--------------------------------------------|-------------------|-------------|
| VSCC10 | chr19:37904945-37904945 | C | G | <i>ZNF569</i>   | NM_152484:exon6:c.G615C:p.L205L            | Silent            |             |
| VSCC10 | chr19:38380728-38380728 | G | C | <i>WDR87</i>    | NM_001291088:exon6:c.C3583G:p.Q1195E,WDR87 | Missense_Mutation | COSM1020680 |
| VSCC10 | chr19:42736683-42736683 | C | T | <i>GSK3A</i>    | NM_019884:exon9:c.G1250A:p.R417H           | Missense_Mutation | COSM1221158 |
| VSCC10 | chr19:45917282-45917282 | C | T | <i>ERCC1</i>    | NM_202001:exon7:c.G713A:p.C238Y,ERCC1      | Missense_Mutation |             |
| VSCC10 | chr19:47425385-47425385 | C | T | <i>ARHGAP35</i> | NM_004491:exon1:c.C3453T:p.I1151I          | Silent            |             |
| VSCC10 | chr19:50156060-50156060 | C | T | <i>SCAF1</i>    | NM_021228:exon7:c.C2414T:p.S805L           | Missense_Mutation |             |
| VSCC10 | chr19:52380551-52380551 | G | A | <i>ZNF577</i>   | NM_001135590:exon6:c.C267T:p.H89H,ZNF577   | Silent            |             |
| VSCC10 | chr19:55543624-55543624 | G | C | <i>GP6</i>      | NM_001083899:exon3:c.C208G:p.Q70E,GP6      | Missense_Mutation |             |
| VSCC10 | chr19:58384891-58384891 | G | A | <i>ZNF814</i>   | NM_001144989:exon3:c.C1867T:p.Q623X        | Nonsense_Mutation |             |
| VSCC10 | chr19:58438212-58438212 | C | T | <i>ZNF418</i>   | NM_001317030:exon2:c.G1082A:p.R361Q,ZNF418 | Missense_Mutation | COSM5523304 |
| VSCC10 | chr20:644648-644648     | G | C | <i>SCRT2</i>    | NM_033129:exon2:c.C591G:p.S197S            | Silent            | COSM2713307 |
| VSCC10 | chr20:1426390-1426390   | C | T | <i>NSFL1C</i>   | NM_018839:exon7:c.G778A:p.E260K,NSFL1C     | Missense_Mutation |             |
| VSCC10 | chr20:3528080-3528080   | G | A | <i>ATRN</i>     | NM_001207047:exon5:c.G539A:p.R180Q,ATRN    | Missense_Mutation |             |
| VSCC10 | chr20:3765382-3765382   | C | T | <i>CENPB</i>    | NM_001810:exon1:c.G1749A:p.R583R           | Silent            |             |
| VSCC10 | chr20:4837651-4837651   | C | T | <i>SLC23A2</i>  | NM_005116:exon17:c.G1920A:p.R640R,SLC23A2  | Silent            |             |
| VSCC10 | chr20:5943961-5943961   | C | T | <i>MCM8</i>     | NM_001281520:exon8:c.C831T:p.L277L,MCM8    | Silent            |             |
| VSCC10 | chr20:35675512-35675512 | G | A | <i>RBL1</i>     | NM_002895:exon12:c.C1549T:p.R517C,RBL1     | Missense_Mutation | COSM149404  |
| VSCC10 | chr20:40085915-40085915 | C | T | <i>CHD6</i>     | NM_032221:exon18:c.G2818A:p.G940S          | Missense_Mutation |             |

|        |                          |   |   |                     |                                            |                   |             |
|--------|--------------------------|---|---|---------------------|--------------------------------------------|-------------------|-------------|
| VSCC10 | chr20:50769896-50769896  | G | A | <i>ZFP64</i>        | NM_022088:exon5:c.C673T:p.R225W,ZFP64      | Missense_Mutation |             |
| VSCC10 | chr20:55777667-55777667  | G | A | <i>BMP7</i>         | NM_001719:exon3:c.C624T:p.L208L            | Silent            |             |
| VSCC10 | chr21:33044551-33044551  | G | A | <i>SCAF4</i>        | NM_001145444:exon19:c.C2560T:p.H854Y,SCAF4 | Missense_Mutation | COSM3588060 |
| VSCC10 | chr21:42780033-42780033  | G | A | <i>MX2</i>          | NM_002463:exon14:c.G2021A:p.R674H          | Missense_Mutation |             |
| VSCC10 | chr22:24717609-24717609  | G | A | <i>SPECC1L</i>      | NM_001145468:exon4:c.G661A:p.E221K,SPECC1L | Missense_Mutation |             |
| VSCC10 | chr22:30415695-30415695  | G | A | <i>MTMR3</i>        | NM_021090:exon17:c.G2047A:p.G683R,MTMR3    | Missense_Mutation |             |
| VSCC10 | chr22:31741246-31741246  | C | A | <i>PATZ1</i>        | NM_014323:exon1:c.G343T:p.G115W,PATZ1      | Missense_Mutation |             |
| VSCC10 | chr22:41605742-41605742  | G | A | <i>L3MBTL2</i>      | NM_031488:exon2:c.G67A:p.D23N              | Missense_Mutation |             |
| VSCC10 | chrX:12938669-12938669   | C | T | <i>TLR8</i>         | NM_138636:exon2:c.C1510T:p.L504F,TLR8      | Missense_Mutation |             |
| VSCC10 | chrX:38144875-38144875   | G | C | <i>RPGR</i>         | NM_001034853:exon15:c.C3377G:p.S1126X      | Nonsense_Mutation |             |
| VSCC10 | chrX:54841140-54841140   | G | A | <i>MAGED2</i>       | NM_014599:exon11:c.G1318A:p.E440K,MAGED2   | Missense_Mutation |             |
| VSCC10 | chrX:70389678-70389678   | G | A | <i>NLGN3</i>        | NM_001166660:exon6:c.G2158A:p.E720K,NLGN3  | Missense_Mutation | COSM3609121 |
| VSCC10 | chrX:86067981-86067981   | G | A | <i>DACH2</i>        | NM_001139514:exon7:c.G1324A:p.V442M,DACH2  | Missense_Mutation | COSM82375   |
| VSCC10 | chrX:100745816-100745816 | C | G | <i>ARMCX4</i>       | NM_001256155:exon2:c.C2240G:p.S747C        | Missense_Mutation |             |
| VSCC10 | chrX:107976250-107976250 | C | T | <i>IRS4</i>         | NM_003604:exon1:c.G3325A:p.E1109K          | Missense_Mutation |             |
| VSCC10 | chrX:117033290-117033290 | G | C | <i>KLHL13</i>       | NM_001168300:exon7:c.C1531G:p.Q511E,KLHL13 | Missense_Mutation |             |
| VSCC10 | chrX:124455376-124455376 | G | C | <i>LOC100129520</i> | NM_001195272:exon1:c.G1408C:p.A470P        | Missense_Mutation |             |
| VSCC10 | chrX:135618241-135618241 | C | T | <i>VGLL1</i>        | NM_016267:exon2:c.C62T:p.T21M              | Missense_Mutation | COSM303092  |

|        |                          |   |   |                |                                             |                   |                |             |
|--------|--------------------------|---|---|----------------|---------------------------------------------|-------------------|----------------|-------------|
| VSCC10 | chrX:153070580-153070580 | C | T | <i>PDZD4</i>   | NM_001303514:exon5:c.G407A:p.R136H,PDZD4    | Missense_Mutation |                |             |
| VSCC10 | chrX:153607914-153607914 | G | A | <i>EMD</i>     | NM_000117:exon1:c.G70A:p.G24R               | Missense_Mutation |                |             |
| VSCC10 | chr17:34144733-34144733  | C | T | <i>TAF15</i>   | NM_003487:exon2:c.C21T:p.Y7Y,TAF15          | Silent            | <i>TAF15</i>   | COSM4839090 |
| VSCC10 | chr7:98552761-98552761   | G | A | <i>TRRAP</i>   | NM_003496:exon39:c.G5696A:p.R1899Q,TRRAP    | Missense_Mutation | <i>TRRAP</i>   |             |
| VSCC10 | chr8:38139026-38139026   | C | T | <i>WHSC1L1</i> | NM_023034:exon20:c.G3577A:p.E1193K          | Missense_Mutation | <i>WHSC1L1</i> |             |
| VSCC10 | chr16:72993621-72993621  | A | T | <i>ZFHX3</i>   | NM_006885:exon2:c.T424A:p.Y142N             | Missense_Mutation | <i>ZFHX3</i>   |             |
| VSCC10 | chr17:38859766-38859766  | A | - | <i>KRT24</i>   | NM_019016:exon1:c.180delT:p.F60fs           | Frame_Shift_Del   |                | COSM3630418 |
| VSCC11 | chr5:112102982-112102982 | G | A | <i>APC</i>     | NM_001127511:exon3:c.G347A:p.R116H,APC      | Missense_Mutation | <i>APC</i>     | COSM5965768 |
| VSCC11 | chr11:44146343-44146343  | C | T | <i>EXT2</i>    | NM_000401:exon5:c.C847T:p.R283W,EXT2        | Missense_Mutation | <i>EXT2</i>    |             |
| VSCC11 | chr7:50444412-50444412   | C | T | <i>IKZF1</i>   | NM_001220768:exon3:c.C342T:p.N114N,IKZF1    | Silent            | <i>IKZF1</i>   |             |
| VSCC11 | chr10:76788989-76788989  | G | A | <i>KAT6B</i>   | NM_001256468:exon18:c.G3858A:p.S1286S,KAT6B | Silent            | <i>KAT6B</i>   |             |
| VSCC11 | chr1:43806123-43806123   | G | T | <i>MPL</i>     | NM_005373:exon6:c.G919T:p.D307Y             | Missense_Mutation | <i>MPL</i>     |             |
| VSCC11 | chr15:88669589-88669589  | C | A | <i>NTRK3</i>   | NM_001243101:exon12:c.G1285T:p.G429X,NTRK3  | Nonsense_Mutation | <i>NTRK3</i>   |             |
| VSCC11 | chr12:70949923-70949923  | C | T | <i>PTPRB</i>   | NM_001206971:exon16:c.G3796A:p.D1266N,PTPRB | Missense_Mutation | <i>PTPRB</i>   | COSM4172432 |
| VSCC11 | chr1:1356367-1356367     | C | T | <i>ANKRD65</i> | NM_001145210:exon2:c.G19A:p.E7K,ANKRD65     | Missense_Mutation |                |             |
| VSCC11 | chr1:12067157-12067157   | C | G | <i>MFN2</i>    | NM_001127660:exon16:c.C1920G:p.L640L,MFN2   | Silent            |                | COSM3879226 |
| VSCC11 | chr1:27432505-27432505   | G | A | <i>SLC9A1</i>  | NM_003047:exon5:c.C1356T:p.I452I            | Silent            |                |             |
| VSCC11 | chr1:32797282-32797282   | G | A | <i>HDAC1</i>   | NM_004964:exon11:c.G1094A:p.R365Q           | Missense_Mutation |                |             |

|        |                          |   |   |                 |                                             |                   |             |
|--------|--------------------------|---|---|-----------------|---------------------------------------------|-------------------|-------------|
| VSCC11 | chr1:36226743-36226743   | G | A | <i>CLSPN</i>    | NM_001190481:exon7:c.C958T:p.R320C,CLSPN    | Missense_Mutation |             |
| VSCC11 | chr1:53980393-53980393   | C | T | <i>GLIS1</i>    | NM_147193:exon7:c.G1263A:p.A421A            | Silent            | COSM5874027 |
| VSCC11 | chr1:90493240-90493240   | G | A | <i>ZNF326</i>   | NM_182976:exon12:c.G1729A:p.E577K           | Missense_Mutation |             |
| VSCC11 | chr1:120342421-120342421 | C | T | <i>REG4</i>     | NM_032044:exon4:c.G230A:p.S77N,REG4         | Missense_Mutation |             |
| VSCC11 | chr1:154519899-154519899 | T | C | <i>TDRD10</i>   | NM_001098475:exon12:c.T967C:p.Y323H,TDRD10  | Missense_Mutation |             |
| VSCC11 | chr1:162351788-162351788 | C | G | <i>C1orf226</i> | NM_001085375:exon1:c.C97G:p.L33V,C1orf226   | Missense_Mutation |             |
| VSCC11 | chr1:169511021-169511021 | T | C | <i>F5</i>       | NM_000130:exon13:c.A3307G:p.N1103D          | Missense_Mutation |             |
| VSCC11 | chr1:201166406-201166406 | G | A | <i>IGFN1</i>    | NM_001164586:exon5:c.G328A:p.G110R          | Missense_Mutation |             |
| VSCC11 | chr1:225231595-225231595 | G | A | <i>DNAH14</i>   | NM_001373:exon15:c.G1822A:p.E608K           | Missense_Mutation |             |
| VSCC11 | chr1:228210567-228210567 | G | A | <i>WNT3A</i>    | NM_033131:exon2:c.G271A:p.V91I              | Missense_Mutation |             |
| VSCC11 | chr1:228464337-228464337 | C | T | <i>OBSCN</i>    | NM_001098623:exon22:c.C6407T:p.S2136L,OBSCN | Missense_Mutation |             |
| VSCC11 | chr1:234565006-234565006 | G | C | <i>TARBP1</i>   | NM_005646:exon17:c.C2936G:p.S979C           | Missense_Mutation | COSM5550349 |
| VSCC11 | chr1:235897804-235897804 | G | A | <i>LYST</i>     | NM_000081:exon32:c.C8514T:p.D2838D,LYST     | Silent            |             |
| VSCC11 | chr2:29274645-29274645   | C | T | <i>FAM179A</i>  | NM_199280:exon20:c.C2746T:p.R916W           | Missense_Mutation |             |
| VSCC11 | chr2:29404501-29404501   | C | T | <i>CLIP4</i>    | NM_001287527:exon16:c.C1860T:p.S620S,CLIP4  | Silent            |             |
| VSCC11 | chr2:37319178-37319178   | C | T | <i>GPATCH11</i> | NM_001278505:exon3:c.C127T:p.R43X,GPATCH11  | Nonsense_Mutation |             |
| VSCC11 | chr2:43953531-43953531   | G | A | <i>PLEKHH2</i>  | NM_172069:exon17:c.G2662A:p.V888I           | Missense_Mutation |             |
| VSCC11 | chr2:43984289-43984289   | C | T | <i>PLEKHH2</i>  | NM_172069:exon26:c.C3827T:p.S1276L          | Missense_Mutation |             |



|        |                          |   |   |                |                                             |                   |             |
|--------|--------------------------|---|---|----------------|---------------------------------------------|-------------------|-------------|
| VSCC11 | chr2:44993671-44993671   | G | C | <i>CAMKMT</i>  | NM_024766:exon10:c.G865C:p.D289H            | Missense_Mutation |             |
| VSCC11 | chr2:50723194-50723194   | G | T | <i>NRXN1</i>   | NM_004801:exon15:c.C2919A:p.N973K,NRXN1     | Missense_Mutation |             |
| VSCC11 | chr2:61389638-61389638   | C | G | <i>C2orf74</i> | NM_001143959:exon1:c.C10G:p.L4V             | Missense_Mutation |             |
| VSCC11 | chr2:64147042-64147042   | A | G | <i>VPS54</i>   | NM_001005739:exon15:c.T2103C:p.I701I,VPS54  | Silent            |             |
| VSCC11 | chr2:153575151-153575151 | G | A | <i>ARL6IP6</i> | NM_152522:exon1:c.G13A:p.E5K                | Missense_Mutation |             |
| VSCC11 | chr2:206605358-206605358 | G | A | <i>NRP2</i>    | NM_003872:exon8:c.G1262A:p.R421Q,NRP2       | Missense_Mutation |             |
| VSCC11 | chr2:206608157-206608157 | G | A | <i>NRP2</i>    | NM_003872:exon9:c.G1522A:p.G508R,NRP2       | Missense_Mutation | COSM1298268 |
| VSCC11 | chr2:219320347-219320347 | C | T | <i>USP37</i>   | NM_020935:exon25:c.G2808A:p.Q936Q           | Silent            | COSM5753747 |
| VSCC11 | chr3:14746106-14746106   | G | T | <i>C3orf20</i> | NM_001184957:exon7:c.G775T:p.D259Y,C3orf20  | Missense_Mutation |             |
| VSCC11 | chr3:50329883-50329883   | C | T | <i>IFRD2</i>   | NM_006764:exon1:c.G15A:p.S5S                | Silent            |             |
| VSCC11 | chr3:51454273-51454273   | G | A | <i>VPRBP</i>   | NM_001171904:exon16:c.C3409T:p.R1137W,VPRBP | Missense_Mutation | COSM232902  |
| VSCC11 | chr3:52473762-52473762   | G | A | <i>SEMA3G</i>  | NM_020163:exon12:c.C1401T:p.I467I           | Silent            |             |
| VSCC11 | chr3:53899178-53899178   | T | C | <i>IL17RB</i>  | NM_018725:exon11:c.T1352C:p.I451T           | Missense_Mutation |             |
| VSCC11 | chr3:97594039-97594039   | C | G | <i>CRYBG3</i>  | NM_153605:exon4:c.C4001G:p.S1334C           | Missense_Mutation |             |
| VSCC11 | chr3:132068786-132068786 | C | G | <i>ACPP</i>    | NM_001292037:exon7:c.C705G:p.L235L,ACPP     | Silent            |             |
| VSCC11 | chr3:134270780-134270780 | C | T | <i>CEP63</i>   | NM_001042383:exon11:c.C1255T:p.Q419X,CEP63  | Nonsense_Mutation |             |
| VSCC11 | chr3:138762818-138762818 | G | A | <i>PRR23C</i>  | NM_001134657:exon1:c.C645T:p.F215F          | Silent            |             |
| VSCC11 | chr3:186522458-186522458 | C | T | <i>RFC4</i>    | NM_002916:exon2:c.G45A:p.P15P,RFC4          | Silent            |             |

|        |                          |   |   |                |                                              |                   |                |
|--------|--------------------------|---|---|----------------|----------------------------------------------|-------------------|----------------|
| VSCC11 | chr4:1349013-1349013     | G | C | <i>UVSSA</i>   | NM_020894:exon7:c.G1156C:p.E386Q             | Missense_Mutation |                |
| VSCC11 | chr4:2958458-2958458     | G | A | <i>NOPI4</i>   | NM_001291978:exon3:c.C411T:p.I137I,NOPI4     | Silent            |                |
| VSCC11 | chr4:107956643-107956643 | T | C | <i>DKK2</i>    | NM_014421:exon1:c.A106G:p.N36D               | Missense_Mutation | COSM5639651    |
| VSCC11 | chr4:123664853-123664853 | C | G | <i>BBS12</i>   | NM_152618:exon2:c.C1806G:p.L602L,BBS12       | Silent            |                |
| VSCC11 | chr4:134072328-134072328 | C | G | <i>PCDH10</i>  | NM_020815:exon1:c.C1033G:p.L345V,PCDH10      | Missense_Mutation | COSM3459227    |
| VSCC11 | chr4:141311807-141311807 | G | C | <i>CLGN</i>    | NM_004362:exon14:c.C1727G:p.S576X,CLGN       | Nonsense_Mutation | COSM3954645    |
| VSCC11 | chr4:183601020-183601020 | A | G | <i>TENM3</i>   | NM_001080477:exon8:c.A1528G:p.I510V          | Missense_Mutation |                |
| VSCC11 | chr5:13845060-13845060   | G | A | <i>DNAH5</i>   | NM_001369:exon32:c.C5157T:p.F1719F           | Silent            |                |
| VSCC11 | chr19:11113731-11113731  | C | T | <i>SMARCA4</i> | NM_001128845:exon11:c.C1839T:p.S613S,SMARCA4 | Silent            | <i>SMARCA4</i> |
| VSCC11 | chr5:126738250-126738250 | G | T | <i>MEGF10</i>  | NM_001256545:exon8:c.G793T:p.G265C,MEGF10    | Missense_Mutation |                |
| VSCC11 | chr5:136314363-136314363 | C | A | <i>SPOCK1</i>  | NM_004598:exon11:c.G1300T:p.E434X            | Nonsense_Mutation |                |
| VSCC11 | chr5:140183167-140183167 | C | T | <i>PCDHA3</i>  | NM_018906:exon1:c.C2385T:p.L795L,PCDHA3      | Silent            | COSM4074286    |
| VSCC11 | chr5:140961900-140961900 | C | G | <i>DIAPH1</i>  | NM_001079812:exon6:c.G636C:p.L212F,DIAPH1    | Missense_Mutation |                |
| VSCC11 | chr5:145631291-145631291 | C | T | <i>RBM27</i>   | NM_018989:exon9:c.C1297T:p.R433C             | Missense_Mutation |                |
| VSCC11 | chr5:154271090-154271090 | C | T | <i>GEMIN5</i>  | NM_001252156:exon26:c.G3970A:p.E1324K,GEMIN5 | Missense_Mutation | COSM4951599    |
| VSCC11 | chr5:174919247-174919247 | G | A | <i>SFXN1</i>   | NM_022754:exon2:c.G141A:p.A47A               | Silent            |                |
| VSCC11 | chr5:178043942-178043942 | G | A | <i>CLK4</i>    | NM_020666:exon5:c.C483T:p.I161I              | Silent            |                |
| VSCC11 | chr6:4031875-4031875     | C | T | <i>PRPF4B</i>  | NM_003913:exon2:c.C124T:p.R42C               | Missense_Mutation | COSM947744     |

|        |                          |   |   |                |                                           |                   |             |
|--------|--------------------------|---|---|----------------|-------------------------------------------|-------------------|-------------|
| VSCC11 | chr6:20846393-20846393   | C | A | <i>CDKALI</i>  | NM_017774:exon9:c.C726A:p.A242A           | Silent            |             |
| VSCC11 | chr6:41060762-41060762   | C | G | <i>NFYA</i>    | NM_021705:exon7:c.C739G:p.L247V,NFYA      | Missense_Mutation |             |
| VSCC11 | chr6:88757815-88757815   | G | A | <i>SPACA1</i>  | NM_030960:exon1:c.G192A:p.P64P            | Silent            | COSM191075  |
| VSCC11 | chr6:111136279-111136279 | C | G | <i>CDK19</i>   | NM_001300960:exon1:c.G61C:p.E21Q,CDK19    | Missense_Mutation |             |
| VSCC11 | chr7:5360766-5360766     | G | A | <i>TNRC18</i>  | NM_001080495:exon22:c.C6498T:p.L2166L     | Silent            |             |
| VSCC11 | chr7:56148914-56148914   | C | T | <i>PHKG1</i>   | NM_001258460:exon10:c.G970A:p.V324I,PHKG1 | Missense_Mutation |             |
| VSCC11 | chr7:73010574-73010574   | G | A | <i>MLXIPL</i>  | NM_032951:exon13:c.C1967T:p.S656F,MLXIPL  | Missense_Mutation |             |
| VSCC11 | chr7:99474543-99474543   | C | T | <i>OR2AE1</i>  | NM_001005276:exon1:c.G114A:p.A38A         | Silent            |             |
| VSCC11 | chr7:100414857-100414857 | G | A | <i>EPHB4</i>   | NM_004444:exon8:c.C1545T:p.Y515Y          | Silent            |             |
| VSCC11 | chr7:146818078-146818078 | C | G | <i>CNTNAP2</i> | NM_014141:exon6:c.C762G:p.N254K           | Missense_Mutation | COSM1240731 |
| VSCC11 | chr7:149559477-149559477 | G | A | <i>ZNF862</i>  | NM_001099220:exon7:c.G3228A:p.T1076T      | Silent            |             |
| VSCC11 | chr8:2954441-2954441     | G | T | <i>CSMD1</i>   | NM_033225:exon47:c.C7068A:p.N2356K        | Missense_Mutation | COSM4602308 |
| VSCC11 | chr8:21891670-21891670   | G | A | <i>NPM2</i>    | NM_182795:exon6:c.G415A:p.E139K,NPM2      | Missense_Mutation |             |
| VSCC11 | chr8:38965302-38965302   | G | A | <i>ADAM32</i>  | NM_001313994:exon1:c.G109A:p.A37T,ADAM32  | Missense_Mutation |             |
| VSCC11 | chr8:144407583-144407583 | C | T | <i>TOP1MT</i>  | NM_001258447:exon5:c.G310A:p.D104N,TOP1MT | Missense_Mutation | COSM4418966 |
| VSCC11 | chr8:145730706-145730706 | C | G | <i>GPT</i>     | NM_005309:exon5:c.C573G:p.L191L           | Silent            | COSM4407268 |
| VSCC11 | chr9:13176383-13176383   | C | T | <i>MPDZ</i>    | NM_001261406:exon20:c.G2683A:p.D895N,MPDZ | Missense_Mutation |             |
| VSCC11 | chr9:74674186-74674186   | C | T | <i>C9orf57</i> | NM_001128618:exon2:c.G128A:p.R43H         | Missense_Mutation |             |

|        |                           |   |   |               |                                             |                   |                           |
|--------|---------------------------|---|---|---------------|---------------------------------------------|-------------------|---------------------------|
| VSCC11 | chr9:90321998-90321998    | G | A | <i>DAPK1</i>  | NM_001288729:exon26:c.G4012A:p.D1338N,DAPK1 | Missense_Mutation |                           |
| VSCC11 | chr9:117110145-117110145  | C | T | <i>AKNA</i>   | NM_030767:exon16:c.G3257A:p.R1086Q          | Missense_Mutation |                           |
| VSCC11 | chr9:131482210-131482210  | G | C | <i>PKN3</i>   | NM_013355:exon20:c.G2290C:p.E764Q           | Missense_Mutation |                           |
| VSCC11 | chr9:131721117-131721117  | C | G | <i>NUP188</i> | NM_015354:exon7:c.C409G:p.L137V             | Missense_Mutation | COSM3510597               |
| VSCC11 | chr9:131765622-131765622  | G | A | <i>NUP188</i> | NM_015354:exon38:c.G4323A:p.Q1441Q          | Silent            | COSM974115                |
| VSCC11 | chr9:137804963-137804963  | C | T | <i>FCN1</i>   | NM_002003:exon6:c.G367A:p.D123N             | Missense_Mutation |                           |
| VSCC11 | chr10:48388864-48388864   | C | T | <i>RBP3</i>   | NM_002900:exon1:c.G2014A:p.A672T            | Missense_Mutation |                           |
| VSCC11 | chr10:49944072-49944072   | C | T | <i>WDFY4</i>  | NM_020945:exon11:c.C1835T:p.S612L           | Missense_Mutation | COSM4664756               |
| VSCC11 | chr10:70508917-70508917   | G | A | <i>CCAR1</i>  | NM_001282959:exon8:c.G806A:p.R269H,CCAR1    | Missense_Mutation |                           |
| VSCC11 | chr10:75541948-75541948   | G | A | <i>CHCHD1</i> | NM_203298:exon1:c.G115A:p.E39K              | Missense_Mutation |                           |
| VSCC11 | chr10:81927002-81927002   | C | T | <i>ANXA11</i> | NM_001157:exon5:c.G629A:p.R210Q,ANXA11      | Missense_Mutation |                           |
| VSCC11 | chr10:105944776-105944776 | C | G | <i>CFAP43</i> | NM_025145:exon16:c.G2139C:p.W713C           | Missense_Mutation | COSM330998                |
| VSCC11 | chr11:562514-562514       | G | A | <i>RASSF7</i> | NM_001143993:exon3:c.G560A:p.R187Q,RASSF7   | Missense_Mutation | COSM3362134               |
| VSCC11 | chr11:4616153-4616153     | C | T | <i>OR52I1</i> | NM_001005169:exon1:c.C885T:p.I295I          | Silent            |                           |
| VSCC11 | chr11:14880700-14880700   | G | A | <i>PDE3B</i>  | NM_000922:exon13:c.G2632A:p.E878K           | Missense_Mutation |                           |
| VSCC11 | chr17:40354424-40354424   | G | A | <i>STAT5B</i> | NM_012448:exon18:c.C2171T:p.T724M           | Missense_Mutation | <i>STAT5B</i> COSM3519654 |
| VSCC11 | chr11:55418641-55418641   | A | G | <i>OR4S2</i>  | NM_001004059:exon1:c.A262G:p.K88E           | Missense_Mutation | COSM4969161               |
| VSCC11 | chr11:57886794-57886794   | C | T | <i>OR9I1</i>  | NM_001005211:exon1:c.G123A:p.G41G           | Silent            |                           |

|        |                           |   |   |                 |                                               |                   |             |
|--------|---------------------------|---|---|-----------------|-----------------------------------------------|-------------------|-------------|
| VSCC11 | chr11:60703933-60703933   | C | T | <i>TMEM132A</i> | NM_017870:exon11:c.C2629T:p.Q877X, TMEM132A   | Nonsense_Mutation |             |
| VSCC11 | chr11:62295933-62295933   | T | C | <i>AHNAK</i>    | NM_001620:exon5:c.A5956G:p.T1986A             | Missense_Mutation |             |
| VSCC11 | chr11:65164336-65164336   | C | T | <i>FRMD8</i>    | NM_001300832:exon6:c.C480T:p.L160L, FRMD8     | Silent            |             |
| VSCC11 | chr11:65811087-65811087   | G | T | <i>GAL3ST3</i>  | NM_033036:exon3:c.C187A:p.H63N                | Missense_Mutation |             |
| VSCC11 | chr11:66191839-66191839   | C | T | <i>NPAS4</i>    | NM_178864:exon7:c.C1478T:p.S493L              | Missense_Mutation |             |
| VSCC11 | chr11:66328128-66328128   | G | A | <i>ACTN3</i>    | UNKNOWN                                       | unknown           | COSM4878645 |
| VSCC11 | chr11:68529147-68529147   | C | G | <i>CPT1A</i>    | NM_001031847:exon16:c.G1884C:p.Q628H, CPT1A   | Missense_Mutation |             |
| VSCC11 | chr11:71148984-71148984   | G | A | <i>DHCR7</i>    | NM_001163817:exon8:c.C837T:p.I279L, DHCR7     | Silent            | COSM5718029 |
| VSCC11 | chr11:73021808-73021808   | C | T | <i>ARHGEF17</i> | NM_014786:exon1:c.C2125T:p.R709X              | Nonsense_Mutation |             |
| VSCC11 | chr11:75148056-75148056   | G | C | <i>GDPD5</i>    | NM_030792:exon16:c.C1594G:p.Q532E             | Missense_Mutation |             |
| VSCC11 | chr11:120082164-120082164 | C | G | <i>OAF</i>      | NM_178507:exon1:c.C177G:p.L59L                | Silent            |             |
| VSCC11 | chr11:125447457-125447457 | C | T | <i>EI24</i>     | UNKNOWN                                       | unknown           |             |
| VSCC11 | chr11:129794937-129794937 | C | T | <i>PRDM10</i>   | NM_199439:exon8:c.G1460A:p.S487N, PRDM10      | Missense_Mutation |             |
| VSCC11 | chr12:3742886-3742886     | G | A | <i>CRACR2A</i>  | NM_001144958:exon15:c.C1619T:p.S540F          | Missense_Mutation |             |
| VSCC11 | chr12:6438654-6438654     | C | T | <i>TNFRSF1A</i> | NM_001065:exon10:c.G1192A:p.E398K             | Missense_Mutation |             |
| VSCC11 | chr12:13722929-13722929   | C | T | <i>GRIN2B</i>   | NM_000834:exon11:c.G2194A:p.D732N             | Missense_Mutation |             |
| VSCC11 | chr12:21727101-21727101   | C | T | <i>GYS2</i>     | NM_021957:exon4:c.G655A:p.D219N               | Missense_Mutation | COSM1721403 |
| VSCC11 | chr12:31255209-31255209   | G | A | <i>DDX11</i>    | NM_004399:exon21:c.G2085A:p.V695V, DDX11      | Silent            |             |
| VSCC11 | chr12:42853839-42853839   | G | C | <i>PRICKLE1</i> | NM_001144881:exon8:c.C2268G:p.G756G, PRICKLE1 | Silent            |             |

|        |                           |   |   |                 |                                         |                   |             |
|--------|---------------------------|---|---|-----------------|-----------------------------------------|-------------------|-------------|
| VSCC11 | chr12:43769277-43769277   | C | G | <i>ADAMTS20</i> | NM_025003:exon36:c.G5351C:p.R1784T      | Missense_Mutation | COSM3544801 |
| VSCC11 | chr12:45610155-45610155   | C | G | <i>ANO6</i>     | NM_001025356:exon1:c.C51G:p.D17E,ANO6   | Missense_Mutation |             |
| VSCC11 | chr12:49047912-49047912   | C | T | <i>KANSL2</i>   | NM_017822:exon10:c.G1394A:p.R465Q       | Missense_Mutation | COSM2706060 |
| VSCC11 | chr12:65269337-65269337   | G | A | <i>TBC1D30</i>  | NM_015279:exon12:c.G2055A:p.P685P       | Silent            |             |
| VSCC11 | chr12:112481544-112481544 | G | A | <i>NAA25</i>    | NM_024953:exon18:c.C2135T:p.S712L       | Missense_Mutation |             |
| VSCC11 | chr12:125834041-125834041 | C | A | <i>TMEM132B</i> | NM_052907:exon2:c.C96A:p.S32S           | Silent            |             |
| VSCC11 | chr13:25671850-25671850   | G | A | <i>PABPC3</i>   | NM_030979:exon1:c.G1514A:p.R505Q        | Missense_Mutation |             |
| VSCC11 | chr13:26923248-26923248   | C | G | <i>CDK8</i>     | NM_001260:exon3:c.C244G:p.Q82E          | Missense_Mutation | COSM3991976 |
| VSCC11 | chr13:35619496-35619496   | C | T | <i>NBEA</i>     | NM_015678:exon4:c.C681T:p.H227H         | Silent            |             |
| VSCC11 | chr13:47315819-47315819   | C | T | <i>LRCHI</i>    | NM_015116:exon19:c.C2023T:p.R675C,LRCH1 | Missense_Mutation | COSM1308069 |
| VSCC11 | chr13:53421638-53421638   | C | T | <i>PCDH8</i>    | NM_002590:exon1:c.G934A:p.V312M,PCDH8   | Missense_Mutation | COSM1416790 |
| VSCC11 | chr14:20917398-20917398   | G | A | <i>OSGEP</i>    | NM_017807:exon4:c.C439T:p.R147C         | Missense_Mutation |             |
| VSCC11 | chr14:52520942-52520942   | C | T | <i>NID2</i>     | NM_007361:exon4:c.G865A:p.A289T         | Missense_Mutation | COSM1120827 |
| VSCC11 | chr14:103807311-103807311 | G | A | <i>EIF5</i>     | NM_183004:exon11:c.G1218A:p.S406S,EIF5  | Silent            | COSM121356  |
| VSCC11 | chr14:105406476-105406476 | G | C | <i>AHNAK2</i>   | NM_138420:exon7:c.C15312G:p.L5104L      | Silent            |             |
| VSCC11 | chr14:105996130-105996130 | G | A | <i>TMEM121</i>  | NM_025268:exon2:c.G959A:p.X320X         | Silent            |             |
| VSCC11 | chr15:42446564-42446564   | C | T | <i>PLA2G4F</i>  | NM_213600:exon3:c.G277A:p.E93K          | Missense_Mutation | COSM4823079 |
| VSCC11 | chr15:48726812-48726812   | C | T | <i>FBN1</i>     | NM_000138:exon54:c.G6595A:p.G2199S      | Missense_Mutation |             |

|        |                         |   |   |                 |                                                  |                       |             |
|--------|-------------------------|---|---|-----------------|--------------------------------------------------|-----------------------|-------------|
| VSCC11 | chr15:56970931-56970931 | G | A | <i>ZNF280D</i>  | NM_001002843:exon10:c.C1054<br>T:p.R352C,ZNF280D | Missense_M<br>utation | COSM1747579 |
| VSCC11 | chr15:70961264-70961264 | C | G | <i>UACA</i>     | NM_001008224:exon16:c.G1720<br>C:p.E574Q,UACA    | Missense_M<br>utation |             |
| VSCC11 | chr15:72302697-72302697 | C | T | <i>MYO9A</i>    | NM_006901:exon7:c.G1247A:p.<br>R416Q             | Missense_M<br>utation |             |
| VSCC11 | chr15:75503327-75503327 | G | A | <i>C15orf39</i> | NM_015492:exon3:c.G3014A:p.<br>R1005H            | Missense_M<br>utation |             |
| VSCC11 | chr15:76018456-76018456 | G | A | <i>ODF3L1</i>   | NM_175881:exon3:c.G287A:p.R<br>96Q               | Missense_M<br>utation |             |
| VSCC11 | chr15:86807761-86807761 | A | G | <i>AGBL1</i>    | NM_152336:exon10:c.A1221G:p.<br>E407E            | Silent                |             |
| VSCC11 | chr15:90227061-90227061 | G | A | <i>PEX11A</i>   | NM_001271572:exon3:c.C198T:<br>p.F66F,PEX11A     | Silent                | COSM3490166 |
| VSCC11 | chr15:91453765-91453765 | C | T | <i>MAN2A2</i>   | NM_006122:exon10:c.C1612T:p.<br>H538Y            | Missense_M<br>utation |             |
| VSCC11 | chr16:2201874-2201874   | G | C | <i>RAB26</i>    | NM_014353:exon5:c.G433C:p.D<br>145H,RAB26        | Missense_M<br>utation |             |
| VSCC11 | chr16:2979915-2979915   | G | A | <i>FLYWCH1</i>  | NM_001308068:exon3:c.G229A:<br>p.A77T,FLYWCH1    | Missense_M<br>utation |             |
| VSCC11 | chr16:31131669-31131669 | G | A | <i>KAT8</i>     | NM_032188:exon3:c.G296A:p.R<br>99Q,KAT8          | Missense_M<br>utation |             |
| VSCC11 | chr16:58073967-58073967 | C | T | <i>MMP15</i>    | NM_002428:exon4:c.C629T:p.S2<br>10L              | Missense_M<br>utation | COSM4666190 |
| VSCC11 | chr16:81654499-81654499 | C | T | <i>CMIP</i>     | NM_030629:exon3:c.C163T:p.R5<br>5X,CMIP          | Nonsense_<br>Mutation |             |
| VSCC11 | chr16:89167381-89167381 | G | A | <i>ACSF3</i>    | NM_001127214:exon2:c.G292A:<br>p.V98I,ACSF3      | Missense_M<br>utation |             |
| VSCC11 | chr17:8111119-8111119   | G | A | <i>AURKB</i>    | NM_001313953:exon2:c.C88T:p.<br>R30W,AURKB       | Missense_M<br>utation |             |
| VSCC11 | chr17:27047774-27047774 | G | C | <i>RPL23A</i>   | NM_000984:exon2:c.G75C:p.K2<br>5N                | Missense_M<br>utation | COSM5553158 |
| VSCC11 | chr17:30615894-30615894 | G | A | <i>RHBDL3</i>   | NM_138328:exon4:c.G378A:p.E<br>126E              | Silent                | COSM3749685 |
| VSCC11 | chr17:36891572-36891572 | G | A | <i>PCGF2</i>    | NM_007144:exon11:c.C939T:p.<br>A313A             | Silent                |             |

|        |                         |   |   |                 |                                            |                   |             |
|--------|-------------------------|---|---|-----------------|--------------------------------------------|-------------------|-------------|
| VSCC11 | chr17:37885787-37885787 | G | A | <i>MIEN1</i>    | NM_032339:exon4:c.C336T:p.C112C            | Silent            |             |
| VSCC11 | chr17:39324284-39324284 | G | A | <i>KRTAP4-3</i> | NM_033187:exon1:c.C141T:p.S47S             | Silent            |             |
| VSCC11 | chr17:40968053-40968053 | C | G | <i>BECN1</i>    | NM_001314000:exon6:c.G475C:p.E159Q,BECN1   | Missense_Mutation |             |
| VSCC11 | chr17:51900463-51900463 | C | T | <i>KIF2B</i>    | NM_032559:exon1:c.C69T:p.F23F              | Silent            |             |
| VSCC11 | chr17:57941171-57941171 | C | T | <i>TUBD1</i>    | NM_001193613:exon5:c.G465A:p.L155L,TUBD1   | Silent            | COSM4117443 |
| VSCC11 | chr17:62228281-62228281 | G | A | <i>TEX2</i>     | NM_001288732:exon11:c.C3181T:p.R1061W,TEX2 | Missense_Mutation |             |
| VSCC11 | chr17:76486869-76486869 | C | T | <i>DNAH17</i>   | NM_173628:exon44:c.G6730A:p.E2244K         | Missense_Mutation |             |
| VSCC11 | chr18:29052258-29052258 | C | T | <i>DSG3</i>     | NM_001944:exon13:c.C1909T:p.L637L          | Silent            |             |
| VSCC11 | chr19:868238-868238     | G | A | <i>MED16</i>    | NM_005481:exon16:c.C2497T:p.R833C          | Missense_Mutation |             |
| VSCC11 | chr19:14501761-14501761 | G | A | <i>ADGRE5</i>   | NM_001025160:exon4:c.G216A:p.S72S,ADGRE5   | Silent            | COSM3780866 |
| VSCC11 | chr19:18648497-18648497 | C | T | <i>FKBP8</i>    | NM_001308373:exon6:c.G856A:p.D286N,FKBP8   | Missense_Mutation | COSM1724117 |
| VSCC11 | chr19:24115238-24115238 | G | T | <i>ZNF726</i>   | NM_001244038:exon4:c.G320T:p.G107V         | Missense_Mutation |             |
| VSCC11 | chr19:36210431-36210431 | C | T | <i>KMT2B</i>    | NM_014727:exon2:c.C424T:p.R142X            | Nonsense_Mutation |             |
| VSCC11 | chr19:36674451-36674451 | G | A | <i>ZNF565</i>   | NM_001042474:exon5:c.C417T:p.N139N,ZNF565  | Silent            |             |
| VSCC11 | chr19:39913373-39913373 | C | T | <i>PLEKHG2</i>  | NM_022835:exon18:c.C1679T:p.P560L          | Missense_Mutation |             |
| VSCC11 | chr19:40419614-40419614 | C | T | <i>FCGBP</i>    | NM_003890:exon6:c.G3380A:p.R1127K          | Missense_Mutation | COSM1091923 |
| VSCC11 | chr19:47767875-47767875 | C | T | <i>CCDC9</i>    | NM_015603:exon6:c.C478T:p.R160C            | Missense_Mutation |             |
| VSCC11 | chr19:50906827-50906827 | C | T | <i>POLD1</i>    | NM_001308632:exon9:c.C1215T:p.Y405Y,POLD1  | Silent            |             |



|        |                         |   |   |                    |                                                |                       |             |
|--------|-------------------------|---|---|--------------------|------------------------------------------------|-----------------------|-------------|
| VSCC11 | chr19:50982231-50982231 | C | T | <i>EMC10</i>       | NM_175063:exon3:c.C205T:p.R6<br>9W,EMC10       | Missense_M<br>utation |             |
| VSCC11 | chr19:56733292-56733292 | C | G | <i>ZSCAN5A</i>     | NM_024303:exon5:c.G1143C:p.<br>E381D           | Missense_M<br>utation |             |
| VSCC11 | chr19:57647267-57647267 | G | A | <i>ZIM3</i>        | NM_052882:exon5:c.C438T:p.H<br>146H            | Silent                |             |
| VSCC11 | chr19:57956104-57956104 | G | C | <i>ZNF749</i>      | NM_001023561:exon3:c.G1588C<br>:p.E530Q        | Missense_M<br>utation |             |
| VSCC11 | chr19:58600122-58600122 | T | C | <i>ZSCAN18</i>     | NM_001145544:exon2:c.A81G:p.<br>L27L,ZSCAN18   | Silent                |             |
| VSCC11 | chr19:58600136-58600136 | C | T | <i>ZSCAN18</i>     | NM_001145544:exon2:c.G67A:p.<br>D23N,ZSCAN18   | Missense_M<br>utation |             |
| VSCC11 | chr20:2413241-2413241   | C | T | <i>TGM6</i>        | NM_198994:exon13:c.C2073T:p.<br>F691F          | Silent                |             |
| VSCC11 | chr20:4680112-4680112   | A | G | <i>PRNP</i>        | NM_001271561:exon2:c.A157G:<br>p.T53A          | Missense_M<br>utation | COSM3769148 |
| VSCC11 | chr20:23065974-23065974 | C | T | <i>CD93</i>        | NM_012072:exon1:c.G856A:p.G<br>286S            | Missense_M<br>utation |             |
| VSCC11 | chr20:60899599-60899599 | G | A | <i>LAMA5</i>       | NM_005560:exon42:c.C5541T:p.<br>P1847P         | Silent                | COSM4011109 |
| VSCC11 | chr21:11049617-11049617 | C | G | <i>BAGE2,BAGE3</i> | NM_182481:exon4:c.G284C:p.R<br>95T,BAGE2       | Missense_M<br>utation | COSM3687531 |
| VSCC11 | chr21:43176943-43176943 | C | A | <i>RIPK4</i>       | NM_020639:exon2:c.G216T:p.K<br>72N             | Missense_M<br>utation |             |
| VSCC11 | chr21:43176954-43176954 | C | T | <i>RIPK4</i>       | NM_020639:exon2:c.G205A:p.E<br>69K             | Missense_M<br>utation |             |
| VSCC11 | chr21:46067216-46067216 | G | A | <i>KRTAP10-11</i>  | NM_198692:exon1:c.G841A:p.A<br>281T            | Missense_M<br>utation |             |
| VSCC11 | chr22:22324694-22324694 | C | T | <i>TOP3B</i>       | NM_001282112:exon6:c.G469A:<br>p.D157N,TOP3B   | Missense_M<br>utation | COSM44890   |
| VSCC11 | chr22:31042720-31042720 | C | G | <i>SLC35E4</i>     | NM_001001479:exon2:c.C755G:<br>p.S252C         | Missense_M<br>utation |             |
| VSCC11 | chr22:45782903-45782903 | T | C | <i>SMC1B</i>       | NM_001291501:exon11:c.A1755<br>G:p.L585L,SMC1B | Silent                |             |
| VSCC11 | chr22:50986900-50986900 | G | A | <i>KLHDC7B</i>     | NM_138433:exon1:c.G305A:p.R<br>102K            | Missense_M<br>utation |             |

|        |                          |                               |        |                |                                                      |                    |                |             |
|--------|--------------------------|-------------------------------|--------|----------------|------------------------------------------------------|--------------------|----------------|-------------|
| VSCC11 | chrX:3530318-3530318     | C                             | T      | <i>PRKX</i>    | NM_005044:exon8:c.G1000A:p.E334K                     | Missense_Mutation  |                |             |
| VSCC11 | chrX:51075901-51075901   | G                             | A      | <i>NUDT10</i>  | NM_001304963:exon1:c.G84A:p.E28E,NUDT10              | Silent             |                |             |
| VSCC11 | chrX:83411166-83411166   | G                             | A      | <i>RPS6KA6</i> | NM_014496:exon3:c.C175T:p.H59Y                       | Missense_Mutation  |                |             |
| VSCC11 | chrX:134427741-134427741 | A                             | T      | <i>ZNF75D</i>  | NM_001185063:exon2:c.T326A:p.V109E,ZNF75D            | Missense_Mutation  |                |             |
| VSCC11 | chrX:142795177-142795177 | T                             | C      | <i>SPANXN2</i> | NM_001009615:exon2:c.A501G:p.L167L                   | Silent             |                |             |
| VSCC11 | chr17:7577538-7577538    | C                             | G      | <i>TP53</i>    | NM_001126115:exon3:c.G347C:p.R116P,TP53              | Missense_Mutation  | <i>TP53</i>    |             |
| VSCC11 | chr17:7577539-7577539    | G                             | A      | <i>TP53</i>    | NM_001126115:exon3:c.C346T:p.R116W,TP53              | Missense_Mutation  | <i>TP53</i>    |             |
| VSCC11 | chr15:50776541-50776541  | G                             | A      | <i>USP8</i>    | NM_001128610:exon12:c.G1873A:p.D625N,USP8            | Missense_Mutation  | <i>USP8</i>    | COSM1266950 |
| VSCC11 | chr2:100210335-100210340 | GGCTGA                        | -      | <i>AFF3</i>    | NM_001025108:exon14:c.1858_1863del:p.620_621del,AFF3 | In_Frame_Deletion  | <i>AFF3</i>    |             |
| VSCC11 | chr1:47904668-47904668   | -                             | CCGCAC | <i>FOXD2</i>   | NM_004474:exon1:c.861_862insCCGCAC;p.H287delinsHPH   | In_Frame_Insertion |                |             |
| VSCC11 | chr4:140811081-140811081 | -                             | TGT    | <i>MAML3</i>   | NM_018717:exon2:c.1508_1509insACA:p.Q503delinsQQ     | In_Frame_Insertion |                |             |
| VSCC11 | chr7:150069396-150069407 | CCGCCAGG<br>GGCC              | -      | <i>REPIN1</i>  | NM_014374:exon1:c.1066_1077del:p.356_359del,REPIN1   | In_Frame_Deletion  |                |             |
| VSCC11 | chr12:53069223-53069243  | ACCTCCGG<br>AGCCGTAG<br>CTGCT | -      | <i>KRT1</i>    | NM_006121:exon9:c.1669_1689del:p.557_563del          | In_Frame_Deletion  |                |             |
| VSCC3  | chrX:39933150-39933150   | C                             | T      | <i>BCOR</i>    | NM_001123383:exon4:c.G1449A;p.P483P,BCOR             | Silent             | <i>BCOR</i>    | COSM3516839 |
| VSCC3  | chr12:1213924-1213924    | T                             | A      | <i>ERC1</i>    | NM_001301248:exon3:c.T1095A;p.H365Q,ERC1             | Missense_Mutation  | <i>ERC1</i>    | COSM4753829 |
| VSCC3  | chr11:3733878-3733878    | C                             | T      | <i>NUP98</i>   | NM_005387:exon20:c.G2709A:p.K903K,NUP98              | Silent             | <i>NUP98</i>   |             |
| VSCC3  | chr1:144916602-144916602 | T                             | C      | <i>PDE4DIP</i> | NM_001002811:exon9:c.A2242G;p.T748A,PDE4DIP          | Missense_Mutation  | <i>PDE4DIP</i> |             |
| VSCC3  | chr1:10041329-10041329   | A                             | G      | <i>NMNAT1</i>  | NM_001297779:exon5:c.A455G:p.Y152C                   | Missense_Mutation  |                |             |

|       |                          |   |   |                |                                                 |                    |             |
|-------|--------------------------|---|---|----------------|-------------------------------------------------|--------------------|-------------|
| VSCC3 | chr1:10710777-10710777   | G | T | <i>CASZ1</i>   | NM_001079843:exon13:c.C2852<br>A:p.S951X,CASZ1  | Nonsense_ Mutation |             |
| VSCC3 | chr1:16458933-16458933   | G | T | <i>EPHA2</i>   | NM_004431:exon12:c.C2055A:p.<br>Y685X           | Nonsense_ Mutation |             |
| VSCC3 | chr1:22903022-22903022   | G | A | <i>EPHA8</i>   | NM_001006943:exon3:c.G472A:<br>p.D158N,EPHA8    | Missense_ Mutation |             |
| VSCC3 | chr1:27158984-27158984   | G | A | <i>ZDHHC18</i> | NM_032283:exon2:c.G382A:p.A<br>128T             | Missense_ Mutation |             |
| VSCC3 | chr1:38003597-38003597   | G | A | <i>SNIP1</i>   | NM_024700:exon4:c.C943T:p.R3<br>15C             | Missense_ Mutation |             |
| VSCC3 | chr1:41978891-41978891   | G | A | <i>HIVEP3</i>  | NM_001127714:exon7:c.C6001T<br>:p.R2001X,HIVEP3 | Nonsense_ Mutation |             |
| VSCC3 | chr1:45293593-45293593   | G | A | <i>PTCH2</i>   | NM_001166292:exon14:c.C1980<br>T:p.S660S,PTCH2  | Silent             |             |
| VSCC3 | chr1:54060500-54060500   | G | T | <i>GLIS1</i>   | NM_147193:exon3:c.C76A:p.L2<br>6I               | Missense_ Mutation |             |
| VSCC3 | chr1:150900323-150900323 | G | A | <i>SETDB1</i>  | NM_001145415:exon2:c.G133A:<br>p.D45N,SETDB1    | Missense_ Mutation |             |
| VSCC3 | chr1:178834205-178834205 | C | A | <i>ANGPTL1</i> | NM_004673:exon3:c.G707T:p.G<br>236V             | Missense_ Mutation |             |
| VSCC3 | chr1:210329113-210329113 | T | C | <i>SYT14</i>   | NM_001146262:exon7:c.T1212C<br>:p.S404S,SYT14   | Silent             |             |
| VSCC3 | chr1:222892650-222892650 | G | A | <i>BROX</i>    | NM_001288579:exon4:c.G254A:<br>p.R85Q,BROX      | Missense_ Mutation |             |
| VSCC3 | chr1:227149148-227149148 | C | T | <i>ADCK3</i>   | NM_020247:exon2:c.C62T:p.A2<br>1V               | Missense_ Mutation |             |
| VSCC3 | chr2:54893179-54893179   | G | A | <i>SPTBN1</i>  | NM_003128:exon34:c.G6787A:p.<br>E2263K          | Missense_ Mutation | COSM4423697 |
| VSCC3 | chr2:71797455-71797455   | G | A | <i>DYSF</i>    | NM_001130976:exon27:c.G2980<br>A:p.D994N,DYSF   | Missense_ Mutation |             |
| VSCC3 | chr2:73613071-73613071   | A | G | <i>ALMS1</i>   | NM_015120:exon1:c.A75G:p.E2<br>5E               | Silent             |             |
| VSCC3 | chr2:96780986-96780986   | C | T | <i>ADRA2B</i>  | NM_000682:exon1:c.G903A:p.E<br>301E             | Silent             | COSM5862970 |
| VSCC3 | chr2:166859139-166859139 | C | A | <i>SCN1A</i>   | NM_001165963:exon21:c.G4127<br>T:p.C1376F,SCN1A | Missense_ Mutation |             |

|       |                          |   |   |                |                                                |                       |             |
|-------|--------------------------|---|---|----------------|------------------------------------------------|-----------------------|-------------|
| VSCC3 | chr2:168102309-168102309 | A | G | <i>XIRP2</i>   | NM_001199144:exon7:c.A3741G<br>:p.L1247L,XIRP2 | Silent                |             |
| VSCC3 | chr2:182784064-182784064 | G | A | <i>SSFA2</i>   | NM_001287504:exon13:c.G2576<br>A:p.R859Q,SSFA2 | Missense_M<br>utation |             |
| VSCC3 | chr2:216964824-216964824 | G | T | <i>TMEM169</i> | NM_001142311:exon3:c.G453T:<br>p.Q151H,TMEM169 | Missense_M<br>utation | COSM1162572 |
| VSCC3 | chr3:38889147-38889147   | G | A | <i>SCN11A</i>  | NM_014139:exon26:c.C4414T:p.<br>R1472X,SCN11A  | Nonsense_<br>Mutation | COSM1230112 |
| VSCC3 | chr3:39107349-39107349   | C | T | <i>WDR48</i>   | NM_001303403:exon3:c.C237T:<br>p.N79N,WDR48    | Silent                | COSM5713377 |
| VSCC3 | chr3:44492947-44492947   | C | A | <i>ZNF445</i>  | NM_181489:exon4:c.G457T:p.V<br>153L            | Missense_M<br>utation | COSM1193001 |
| VSCC3 | chr3:47037965-47037965   | G | A | <i>NBEAL2</i>  | NM_015175:exon16:c.G2356A:p.<br>A786T          | Missense_M<br>utation | COSM150846  |
| VSCC3 | chr3:111835833-111835833 | T | C | <i>C3orf52</i> | NM_001171747:exon4:c.T741C:<br>p.R247R         | Silent                | COSM11491   |
| VSCC3 | chr3:154055956-154055956 | G | A | <i>GPR149</i>  | NM_001038705:exon4:c.C1728T<br>:p.S576S        | Silent                | COSM448312  |
| VSCC3 | chr3:195513461-195513461 | G | A | <i>MUC4</i>    | NM_018406:exon2:c.C4990T:p.P<br>1664S          | Missense_M<br>utation | COSM330203  |
| VSCC3 | chr4:140811108-140811108 | C | T | <i>MAML3</i>   | NM_018717:exon2:c.G1482A:p.<br>Q494Q           | Silent                | COSM120006  |
| VSCC3 | chr5:32388774-32388774   | G | A | <i>ZFR</i>     | NM_016107:exon13:c.C2149T:p.<br>R717C          | Missense_M<br>utation | COSM111637  |
| VSCC3 | chr5:135692425-135692425 | C | T | <i>TRPC7</i>   | NM_001167576:exon2:c.G651A:<br>p.S217S,TRPC7   | Silent                |             |
| VSCC3 | chr5:143853472-143853472 | G | A | <i>KCTD16</i>  | NM_020768:exon4:c.G1082A:p.<br>R361Q           | Missense_M<br>utation |             |
| VSCC3 | chr6:15487630-15487630   | G | A | <i>JARID2</i>  | NM_001267040:exon6:c.G247A:<br>p.D83N,JARID2   | Missense_M<br>utation | COSM4589994 |
| VSCC3 | chr7:77256291-77256291   | G | A | <i>PTPN12</i>  | NM_001131009:exon12:c.G905A<br>:p.R302Q,PTPN12 | Missense_M<br>utation | COSM930080  |
| VSCC3 | chr7:130418739-130418739 | G | T | <i>KLF14</i>   | NM_138693:exon1:c.C122A:p.S4<br>1X             | Nonsense_<br>Mutation | COSM996778  |
| VSCC3 | chr7:139167993-139167993 | G | A | <i>KLRG2</i>   | NM_198508:exon1:c.C396T:p.P1<br>32P            | Silent                | COSM4406312 |

|       |                           |   |   |                 |                                           |                   |             |
|-------|---------------------------|---|---|-----------------|-------------------------------------------|-------------------|-------------|
| VSCC3 | chr8:134050936-134050936  | C | T | <i>SLA</i>      | NM_001282964:exon7:c.G583A:p.E195K,SLA    | Missense_Mutation |             |
| VSCC3 | chr9:35658671-35658671    | G | C | <i>CCDC107</i>  | NM_001195200:exon2:c.G205C:p.G69R,CCDC107 | Missense_Mutation |             |
| VSCC3 | chr9:113132290-113132290  | C | A | <i>SVEP1</i>    | NM_153366:exon47:c.G10607T:p.C3536F       | Missense_Mutation | COSM1294425 |
| VSCC3 | chr9:131600009-131600009  | G | A | <i>CCBL1</i>    | NM_001122672:exon5:c.C372T:p.R124R,CCBL1  | Silent            | COSM5596862 |
| VSCC3 | chr9:137726961-137726961  | G | A | <i>COL5A1</i>   | NM_000093:exon65:c.G5281A:p.D1761N,COL5A1 | Missense_Mutation | COSM5956980 |
| VSCC3 | chr9:138714442-138714442  | C | T | <i>CAMSAP1</i>  | NM_015447:exon11:c.G2065A:p.D689N         | Missense_Mutation |             |
| VSCC3 | chr10:7755196-7755196     | C | T | <i>ITIH2</i>    | NM_002216:exon5:c.C415T:p.R139X           | Nonsense_Mutation | COSM5358593 |
| VSCC3 | chr10:61828717-61828717   | A | G | <i>ANK3</i>     | NM_020987:exon37:c.T11922C:p.T3974T       | Silent            |             |
| VSCC3 | chr10:90492268-90492268   | C | A | <i>LIPK</i>     | NM_001080518:exon5:c.C629A:p.P210H        | Missense_Mutation |             |
| VSCC3 | chr11:6559701-6559701     | C | T | <i>DNHD1</i>    | NM_144666:exon15:c.C3087T:p.S1029S        | Silent            |             |
| VSCC3 | chr11:62356514-62356514   | C | A | <i>TUT1</i>     | NM_022830:exon2:c.G376T:p.D126Y           | Missense_Mutation |             |
| VSCC3 | chr11:111582953-111582953 | C | T | <i>SIK2</i>     | NM_015191:exon9:c.C1120T:p.P374S          | Missense_Mutation | COSM996778  |
| VSCC3 | chr12:653508-653508       | C | T | <i>B4GALNT3</i> | NM_173593:exon4:c.C355T:p.R119W           | Missense_Mutation |             |
| VSCC3 | chr12:7917893-7917893     | G | A | <i>NANOGNB</i>  | NM_001145465:exon1:c.G12A:p.A4A           | Silent            |             |
| VSCC3 | chr12:7917895-7917895     | G | A | <i>NANOGNB</i>  | NM_001145465:exon1:c.G14A:p.R5Q           | Missense_Mutation | COSM330203  |
| VSCC3 | chr12:96380969-96380969   | C | T | <i>HAL</i>      | NM_001258333:exon11:c.G303A:p.T101T,HAL   | Silent            | COSM1319577 |
| VSCC3 | chr12:133102377-133102377 | G | A | <i>FBRSL1</i>   | NM_001142641:exon3:c.G547A:p.E183K        | Missense_Mutation |             |
| VSCC3 | chr13:46358101-46358101   | C | T | <i>SIAH3</i>    | NM_198849:exon2:c.G227A:p.R76H            | Missense_Mutation | COSM111726  |

|       |                           |   |   |               |                                             |                   |             |
|-------|---------------------------|---|---|---------------|---------------------------------------------|-------------------|-------------|
| VSCC3 | chr13:77644803-77644803   | A | G | <i>MYCBP2</i> | NM_015057:exon69:c.T11867C:p.I3956T         | Missense_Mutation | COSM246865  |
| VSCC3 | chr14:20216346-20216346   | C | T | <i>OR4Q3</i>  | NM_172194:exon1:c.C760T:p.P254S             | Missense_Mutation |             |
| VSCC3 | chr14:20711858-20711858   | G | A | <i>OR11H4</i> | NM_001004479:exon1:c.G908A:p.R303H          | Missense_Mutation |             |
| VSCC3 | chr14:101350108-101350108 | G | A | <i>RTL1</i>   | NM_001134888:exon1:c.C1018T:p.R340W         | Missense_Mutation | COSM4668049 |
| VSCC3 | chr15:68631913-68631913   | C | T | <i>ITGA11</i> | NM_001004439:exon11:c.G1201A:p.G401R        | Missense_Mutation | COSM330203  |
| VSCC3 | chr15:74281550-74281550   | G | A | <i>STOML1</i> | NM_001256672:exon3:c.C289T:p.R97C,STOML1    | Missense_Mutation | COSM1319577 |
| VSCC3 | chr16:780597-780597       | G | C | <i>NARFL</i>  | NM_022493:exon11:c.C1251G:p.L417L,NARFL     | Silent            | COSM5826494 |
| VSCC3 | chr16:30723171-30723171   | G | A | <i>SRCAP</i>  | NM_006662:exon12:c.G1508A:p.R503Q           | Missense_Mutation | COSM1163638 |
| VSCC3 | chr16:70166157-70166157   | G | A | <i>PDPR</i>   | NM_017990:exon9:c.G951A:p.K317K             | Silent            |             |
| VSCC3 | chr17:7752362-7752362     | G | A | <i>KDM6B</i>  | NM_001080424:exon11:c.G2756A:p.R919Q        | Missense_Mutation | COSM128642  |
| VSCC3 | chr17:8013545-8013545     | C | T | <i>ALOXE3</i> | NM_001165960:exon10:c.G1566A:p.L522L,ALOXE3 | Silent            |             |
| VSCC3 | chr17:37922133-37922133   | G | A | <i>IKZF3</i>  | NM_001284516:exon3:c.C699T:p.F233F,IKZF3    | Silent            |             |
| VSCC3 | chr17:43013444-43013444   | G | A | <i>KIF18B</i> | NM_001264573:exon2:c.C269T:p.T90M,KIF18B    | Missense_Mutation | COSM5713377 |
| VSCC3 | chr18:47488720-47488720   | C | T | <i>MYO5B</i>  | NM_001080467:exon12:c.G1461A:p.L487L        | Silent            | COSM5713378 |
| VSCC3 | chr19:579520-579520       | G | A | <i>BSG</i>    | NM_198589:exon2:c.G88A:p.V30I,BSG           | Missense_Mutation |             |
| VSCC3 | chr19:6495991-6495991     | G | T | <i>TUBB4A</i> | NM_001289130:exon4:c.C303A:p.P101P,TUBB4A   | Silent            |             |
| VSCC3 | chr19:24309824-24309824   | A | T | <i>ZNF254</i> | NM_001278678:exon2:c.A767T:p.K256M,ZNF254   | Missense_Mutation |             |
| VSCC3 | chr19:35941268-35941268   | C | T | <i>FFAR2</i>  | NM_005306:exon1:c.C652T:p.R218C             | Missense_Mutation |             |

|       |                          |                                         |        |                |                                                                     |                       |             |
|-------|--------------------------|-----------------------------------------|--------|----------------|---------------------------------------------------------------------|-----------------------|-------------|
| VSCC3 | chr19:38377925-38377925  | A                                       | G      | <i>WDR87</i>   | NM_001291088:exon6:c.T6386C<br>:p.L2129P,WDR87                      | Missense_M<br>utation | COSM1396564 |
| VSCC3 | chr19:38797616-38797616  | C                                       | T      | <i>YIF1B</i>   | NM_001145463:exon8:c.G795A:<br>p.P265P                              | Silent                |             |
| VSCC3 | chr19:43019171-43019171  | T                                       | C      | <i>CEACAM1</i> | NM_001184815:exon5:c.A1043G<br>:p.E348G                             | Missense_M<br>utation |             |
| VSCC3 | chr19:57840530-57840530  | A                                       | G      | <i>ZNF543</i>  | NM_213598:exon4:c.A1700G:p.<br>D567G                                | Missense_M<br>utation |             |
| VSCC3 | chr20:60894763-60894763  | C                                       | A      | <i>LAMA5</i>   | NM_005560:exon51:c.G6848T:p.<br>R2283L                              | Missense_M<br>utation |             |
| VSCC3 | chr20:61947911-61947911  | A                                       | G      | <i>COL20A1</i> | NM_020882:exon21:c.A2531G:p.<br>D844G                               | Missense_M<br>utation |             |
| VSCC3 | chr22:50654173-50654173  | T                                       | C      | <i>SELO</i>    | UNKNOWN                                                             | unknown               | COSM1622543 |
| VSCC3 | chrX:47464680-47464680   | C                                       | T      | <i>SYN1</i>    | NM_006950:exon4:c.G626A:p.G<br>209E,SYN1                            | Missense_M<br>utation | COSM1362564 |
| VSCC3 | chr8:103335552-103335552 | T                                       | -      | <i>UBR5</i>    | NM_001282873:exon14:c.1771de<br>1A:p.T591fs,UBR5                    | Frame_Shift<br>_Del   | <i>UBR5</i> |
| VSCC3 | chr1:10702920-10702921   | CG                                      | -      | <i>CASZ1</i>   | NM_001079843:exon20:c.4157_<br>4158del:p.A1386fs                    | Frame_Shift<br>_Del   |             |
| VSCC3 | chr3:27763427-27763427   | -                                       | CGGCGC | <i>EOMES</i>   | NM_001278182:exon1:c.358_35<br>9insGCGCCG;p.A120delinsGAA<br>,EOMES | In_Frame_I<br>ns      |             |
| VSCC3 | chr4:71503554-71503554   | -                                       | G      | <i>ENAM</i>    | NM_031889:exon8:c.583dupG:p.<br>E194fs                              | Frame_Shift<br>_Ins   | COSM1072056 |
| VSCC3 | chr6:109906330-109906332 | CTT                                     | -      | <i>AK9</i>     | NM_001145128:exon19:c.2108_<br>2110del:p.703_704del                 | In_Frame_D<br>el      | COSM4723679 |
| VSCC3 | chr6:148664242-148664242 | -                                       | GAGCCC | <i>SASH1</i>   | NM_015278:exon1:c.39_40insG<br>AGCCC;p.P13delinsPEP                 | In_Frame_I<br>ns      |             |
| VSCC3 | chr8:11666219-11666224   | TCCCAC                                  | -      | <i>FDFT1</i>   | NM_001287750:exon1:c.193_19<br>8del:p.65_66del                      | In_Frame_D<br>el      |             |
| VSCC3 | chr8:103573011-103573037 | TGCAACCCC<br>TGCAACCCC<br>TGCAACCC<br>G | -      | <i>ODF1</i>    | NM_024410:exon2:c.652_678del<br>:p.218_226del                       | In_Frame_D<br>el      | COSM330203  |
| VSCC3 | chr9:100616701-100616706 | GCCGCC                                  | -      | <i>FOXE1</i>   | NM_004473:exon1:c.505_510del<br>:p.169_170del                       | In_Frame_D<br>el      | COSM1724903 |

|       |                           |                                  |     |                  |                                                      |                 |             |
|-------|---------------------------|----------------------------------|-----|------------------|------------------------------------------------------|-----------------|-------------|
| VSCC3 | chr9:133556992-133556992  | -                                | CGC | <i>PRDM12</i>    | NM_021619:exon5:c.1040_1041insCGC:p.L347delinsLA     | In_Frame_Ins    | COSM5957833 |
| VSCC3 | chr9:140918171-140918185  | GGAGAAGG<br>AGACCAC              | -   | <i>CACNA1B</i>   | NM_000718:exon19:c.2976_2990del:p.992_997del,CACNA1B | In_Frame_Del    | COSM5826494 |
| VSCC3 | chr10:13699134-13699142   | CGCCCCC<br>G                     | -   | <i>FRMD4A</i>    | NM_018027:exon22:c.2447_2455del:p.816_819del         | In_Frame_Del    |             |
| VSCC3 | chr11:124750448-124750453 | CGGAGT                           | -   | <i>ROBO3</i>     | NM_022370:exon27:c.4093_4098del:p.1365_1366del       | In_Frame_Del    | COSM5825672 |
| VSCC3 | chr12:118506328-118506333 | TCCTCC                           | -   | <i>VSIG10</i>    | NM_019086:exon8:c.1416_1421del:p.472_474del          | In_Frame_Del    | COSM5495723 |
| VSCC3 | chr14:77493792-77493794   | TGT                              | -   | <i>IRF2BPL</i>   | NM_024496:exon1:c.342_344del:p.114_115del            | In_Frame_Del    | COSM5619779 |
| VSCC3 | chr14:105055119-105055127 | GACGGGCA<br>G                    | -   | <i>C14orf180</i> | NM_001008404:exon5:c.482_819del:p.*161fs,C14orf180   | Frame_Shift_Del | COSM1578374 |
| VSCC3 | chr15:93198679-93198684   | TGGAGC                           | -   | <i>FAM174B</i>   | NM_207446:exon1:c.206_211del:p.69_71del              | In_Frame_Del    | COSM1167521 |
| VSCC3 | chr16:24788423-24788434   | GCAGCCAC<br>AGCC                 | -   | <i>TNRC6A</i>    | NM_014494:exon5:c.333_344del:p.111_115del            | In_Frame_Del    | COSM5713272 |
| VSCC3 | chr22:29885581-29885604   | AGGCCAAG<br>TCCCCAGA<br>GAAGGAAG | -   | <i>NEFH</i>      | NM_021076:exon4:c.1952_1975del:p.651_659del          | In_Frame_Del    | COSM1415516 |

\* UCSC GRCh37/hg19

\*\* Cancer Gene Census (<http://cancer.sanger.ac.uk/census>)

† COSMIC (<http://cancer.sanger.ac.uk/cosmic>)
