# Supplementary material for: Mutational signatures and chromosome alteration profiles of squamous cell carcinomas of the vulva
Source: PubMed Central journal article supplement — Exp Mol Med. 2018 Feb 9;50(2):e442–. doi: 10.1038/emm.2017.265 (PMC5903820; doi:10.1038/emm.2017.265), 2018-02-09
Supplement: emm2017265x3.pdf [file emm2017265x3.pdf]

**Supplementary Table S3. Predicting functional effects of somatic mutations detected in vulvar SCCs.**

| Gene          | Chr:Position*  | Allele (Ref/Alt) | Sample | Polyphen-2 score** | Amino acid change | Mutation Allele Frequency |
|---------------|----------------|------------------|--------|--------------------|-------------------|---------------------------|
| <i>APC</i>    | chr5:112179733 | G/C              | VSCC14 | 0.998              | Lys2814Asn        | 0.13                      |
| <i>APC</i>    | chr5:112179816 | C/G              | VSCC8  | 1                  | Ser2842Cys        | 0.45                      |
| <i>APC</i>    | chr5:112102982 | G/A              | VSCC11 | 0.023              | Arg106His         | 0.06                      |
| <i>BCL11B</i> | chr14:99642095 | C/A              | VSCC4  | 0.807              | Ala289Ser         | 0.22                      |
| <i>BCL11B</i> | chr14:99642095 | C/A              | VSCC10 | 0.807              | Ala289Ser         | 0.23                      |
| <i>BCORL1</i> | chrX:129162622 | G/A              | VSCC7  | 1                  | Arg1364His        | 0.06                      |
| <i>BRCA2</i>  | chr13:32906981 | G/C              | VSCC12 | 0.995              | Glu456Gln         | 0.23                      |
| <i>BRCA2</i>  | chr13:32907084 | G/A              | VSCC12 | 0.002              | Gly490Glu         | 0.26                      |
| <i>CASC5</i>  | chr15:40916432 | G/C              | VSCC10 | 0.958              | Asp1324His        | 0.21                      |
| <i>CASC5</i>  | chr15:40917695 | G/C              | VSCC10 | 0.375              | Glu1771Gln        | 0.31                      |
| <i>CASP8</i>  | chr2:202139642 | C/T              | VSCC7  | 0.038              | Ser226Leu         | 0.31                      |
| <i>CDK12</i>  | chr17:37618494 | C/T              | VSCC4  | 0.993              | Thr57Ile          | 0.31                      |
| <i>CDK12</i>  | chr17:37618494 | C/T              | VSCC10 | 0.993              | Thr57Ile          | 0.26                      |
| <i>CDKN2A</i> | chr9:21971108  | C/A              | VSCC14 | 1                  | Asp84Tyr          | 0.07                      |
| <i>CDKN2A</i> | chr9:21971186  | G/A              | VSCC7  | 0.824              | Arg58Tyr          | 0.3                       |
| <i>CHD4</i>   | chr12:6709750  | C/T              | VSCC7  | 0.987              | Arg338His         | 0.06                      |
| <i>CHD4</i>   | chr12:6709097  | C/T              | VSCC9  | 0.593              | Glu442Lys         | 0.06                      |
| <i>COL1A1</i> | chr17:48270014 | G/A              | VSCC14 | 0.31               | Ser639Phe         | 0.11                      |
| <i>CREBBP</i> | chr16:3777833  | C/G              | VSCC12 | 0.99               | Gln2405His        | 0.28                      |
| <i>CREBBP</i> | chr16:3823797  | C/T              | VSCC13 | 0.192              | Met806Ile         | 0.29                      |
| <i>CREBBP</i> | chr16:3781372  | C/T              | VSCC14 | 1                  | Asp1665Asn        | 0.08                      |
| <i>CRTC1</i>  | chr19:18864392 | G/C              | VSCC15 | 0.946              | Lys207Asn         | 0.25                      |
| <i>CRTC1</i>  | chr19:18886551 | C/T              | VSCC9  | 0.999              | Thr509Met         | 0.2                       |
| <i>EGFR</i>   | chr7:55233037  | C/T              | VSCC7  | 1                  | Pro596Leu         | 0.18                      |
| <i>ERCC1</i>  | chr12:1213924  | T/A              | VSCC3  | 0.999              | His365Gln         | 0.34                      |

|               |                 |     |        |       |            |      |
|---------------|-----------------|-----|--------|-------|------------|------|
| <i>EXT2</i>   | chr11:44146343  | C/T | VSCC11 | 1     | Arg250Trp  | 0.1  |
| <i>FAT1</i>   | chr4:187524435  | C/T | VSCC9  | 0.661 | Asp3751Asn | 0.07 |
| <i>FBXW7</i>  | chr4:153247175  | T/C | VSCC12 | 1     | Arg463Gly  | 0.32 |
| <i>FBXW7</i>  | chr4:153247366  | C/T | VSCC5  | 1     | Arg399Gln  | 0.65 |
| <i>HOOK3</i>  | chr8:42865534   | G/C | VSCC14 | 1     | Glu609Gln  | 0.07 |
| <i>HOOK3</i>  | chr8:42865517   | G/A | VSCC8  | 1     | Arg603Gln  | 0.06 |
| <i>HRAS</i>   | chr11:534289    | C/T | VSCC13 | 0.831 | Gly12Ser   | 0.5  |
| <i>KAT6B</i>  | chr10:76789215  | G/A | VSCC7  | 0.999 | Val1545Ile | 0.04 |
| <i>KMT2C</i>  | chr7:151970951  | C/T | VSCC13 | 0.984 | Arg284Gln  | 0.09 |
| <i>KMT2C</i>  | chr7:151860394  | C/G | VSCC8  | 1     | Arg3423Thr | 0.32 |
| <i>KMT2C</i>  | chr7:151877851  | G/A | VSCC8  | 0.985 | Thr2365Ile | 0.55 |
| <i>KMT2C</i>  | chr7:151860342  | C/G | VSCC10 | 0.979 | Glu3440Asp | 0.16 |
| <i>LRP1B</i>  | chr2:141473652  | A/T | VSCC13 | 1     | Asp1971Glu | 0.22 |
| <i>LRP1B</i>  | chr2:141665596  | C/G | VSCC7  | 1     | Asp1124His | 0.09 |
| <i>MLLT6</i>  | chr17:36865522  | G/A | VSCC7  | 1     | Val151Ile  | 0.09 |
| <i>NCOA1</i>  | chr2:24914466   | C/T | VSCC4  | 1     | Arg217Cys  | 0.3  |
| <i>NCOA1</i>  | chr2:24914466   | C/T | VSCC10 | 1     | Arg217Cys  | 0.1  |
| <i>NCOR2</i>  | chr12:124835222 | G/A | VSCC10 | 1     | Pro1259Leu | 0.06 |
| <i>NOTCH1</i> | chr9:139413049  | G/A | VSCC12 | 1     | Arg365Cys  | 0.51 |
| <i>NOTCH1</i> | chr9:139414012  | T/G | VSCC13 | 0.861 | Thr250Pro  | 0.07 |
| <i>NOTCH1</i> | chr9:139414013  | G/T | VSCC13 | 0.999 | Phe249Leu  | 0.07 |
| <i>NOTCH1</i> | chr9:139414014  | A/C | VSCC13 | 1     | Phe249Cys  | 0.06 |
| <i>NRG1</i>   | chr8:32621592   | A/G | VSCC4  | 1     | Glu532Gly  | 0.27 |
| <i>NRG1</i>   | chr8:32621592   | A/G | VSCC10 | 1     | Glu532Gly  | 0.12 |
| <i>PIK3CA</i> | chr3:178936091  | G/A | VSCC4  | 0.991 | Glu545Lys  | 0.21 |
| <i>PIK3CA</i> | chr3:178936091  | G/A | VSCC1  | 0.991 | Glu545Lys  | 0.49 |
| <i>PMS2</i>   | chr7:6026988    | G/A | VSCC9  | 0.018 | Pro470Ser  | 0.13 |
| <i>POLE</i>   | chr12:133236034 | C/T | VSCC9  | 0.998 | Arg1041Gln | 0.05 |
| <i>PTPRB</i>  | chr12:70949923  | C/T | VSCC11 | 0.995 | Asp1356Asn | 0.34 |

|                |                 |     |        |       |            |      |
|----------------|-----------------|-----|--------|-------|------------|------|
| <i>PTPRK</i>   | chr6:128410991  | C/T | VSCC9  | 0.046 | Glu437Lys  | 0.07 |
| <i>RNF213</i>  | chr17:78319136  | G/A | VSCC9  | 0     | Ser407Asn  | 0.09 |
| <i>SMARCA4</i> | chr19:11144179  | G/A | VSCC7  | 0.998 | Glu1254Lys | 0.09 |
| <i>SPEN</i>    | chr1:16258542   | G/A | VSCC9  | 0.063 | Arg1936Gln | 0.06 |
| <i>TLX1</i>    | chr10:102891414 | G/A | VSCC13 | 0.999 | Arg39His   | 0.08 |
| <i>TP53</i>    | chr17:7577511   | A/C | VSCC12 | 1     | Leu257Arg  | 0.64 |
| <i>TP53</i>    | chr17:7577539   | G/A | VSCC15 | 1     | Arg248Trp  | 0.13 |
| <i>TP53</i>    | chr17:7577559   | G/T | VSCC7  | 1     | Ser241Tyr  | 0.32 |
| <i>TP53</i>    | chr17:7577538   | C/G | VSCC11 | 1     | Arg248Pro  | 0.35 |
| <i>TP53</i>    | chr17:7577539   | G/A | VSCC11 | 1     | Arg248Trp  | 0.36 |
| <i>TRRAP</i>   | chr7:98548550   | G/A | VSCC15 | 0.968 | Glu1771Lys | 0.18 |
| <i>TRRAP</i>   | chr7:98552761   | G/A | VSCC10 | 1     | Arg1899Gln | 0.06 |
| <i>UBR5</i>    | chr8:103424438  | G/A | VSCC15 | 0.659 | His9Tyr    | 0.08 |
| <i>ZFHX3</i>   | chr16:72993621  | A/T | VSCC4  | 1     | Tyr142Asn  | 0.17 |
| <i>ZFHX3</i>   | chr16:72830616  | C/T | VSCC7  | 1     | Gly1989Ser | 0.05 |
| <i>ZFHX3</i>   | chr16:72993621  | A/T | VSCC10 | 1     | Tyr142Asn  | 0.22 |

---

\* UCSC GRCh37/hg19

\*\* Probably damaging ( $\geq 0.957$ ), possibly damaging ( $0.453 \leq \text{score} \leq 0.956$ ), or benign ( $\leq 0.452$ )
