# Supplementary material for: Mutational signatures and chromosome alteration profiles of squamous cell carcinomas of the vulva
Source: PubMed Central journal article supplement — Exp Mol Med. 2018 Feb 9;50(2):e442–. doi: 10.1038/emm.2017.265 (PMC5903820; doi:10.1038/emm.2017.265), 2018-02-09
Supplement: emm2017265x4.pdf [file emm2017265x4.pdf]

**Supplementary Table S4. Copy number alterations identified across 13 vulvar squamous cell carcinoma genomes using WES.**

| SampleID | Genomic position*            | Event   | Length (bp) | Cytoband       | Probe Median | Number of Genes | Cancer-related genes**                                                                                                        |
|----------|------------------------------|---------|-------------|----------------|--------------|-----------------|-------------------------------------------------------------------------------------------------------------------------------|
| VSCC1    | chr1:142,823,811-144,596,037 | CN Gain | 1772227     | q21.1          | 0.405373573  | 12              |                                                                                                                               |
| VSCC1    | chr1:187,014,163-192,545,052 | CN Gain | 5530890     | q31.1 - q31.2  | 0.443244964  | 8               |                                                                                                                               |
| VSCC1    | chr10:8,115,765-10,932,126   | CN Gain | 2816362     | p14            | 0.319297239  | 10              | <i>GATA3</i>                                                                                                                  |
| VSCC1    | chr11:36,876,634-43,159,341  | CN Gain | 6282708     | p12            | 0.358191639  | 7               |                                                                                                                               |
| VSCC1    | chr11:68,382,541-70,961,800  | CN Gain | 2579260     | q13.2 - q13.4  | 0.655351818  | 31              | <i>CCND1</i>                                                                                                                  |
| VSCC1    | chr11:70,961,800-135,006,516 | CN Loss | 64044717    | q13.4 - q25    | -0.571906328 | 596             | <i>NUMA1, PICALM, MAML2, BIRC3, ATM, DDX10, POU2AF1, SDHD, ZNF145, PAFAH1B2, PCSK7, MLL, DDX6, CBL, ARHGEF12, FLI1, KCNJ5</i> |
| VSCC1    | chr14:24,975,193-44,885,137  | CN Gain | 19909945    | q12 - q21.2    | 0.301117375  | 84              | <i>NKX2-1, FOXA1</i>                                                                                                          |
| VSCC1    | chr14:45,716,317-50,788,075  | CN Gain | 5071759     | q21.2 - q21.3  | 0.300789177  | 25              |                                                                                                                               |
| VSCC1    | chr14:81,994,028-88,312,691  | CN Gain | 6318664     | q31.1 - q31.3  | 0.542242229  | 8               |                                                                                                                               |
| VSCC1    | chr16:16,291,892-20,329,655  | CN Gain | 4037764     | p13.11 - p12.3 | 0.381660938  | 71              |                                                                                                                               |
| VSCC1    | chr16:46,386,673-46,470,829  | CN Gain | 84157       | q11.2          | 0.647258162  | 0               |                                                                                                                               |
| VSCC1    | chr16:5,123,146-15,718,633   | CN Gain | 10595488    | p13.3 - p13.11 | 0.377248734  | 96              | <i>GRIN2A, CIITA, SOCS1, C16orf75, TNFRSF17, RUNDC2A, ERCC4</i>                                                               |
| VSCC1    | chr18:0-17,200,000           | CN Gain | 17200001    | p11.32 - q11.1 | 0.345989823  | 113             |                                                                                                                               |
| VSCC1    | chr18:18,516,135-75,857,095  | CN Gain | 57340961    | q11.1 - q23    | 0.404135197  | 288             | <i>ZNF521, SS18, SETBP1, MALT1, BCL2, FVT1</i>                                                                                |
| VSCC1    | chr19:56,029,811-56,206,578  | CN Loss | 176768      | q13.42         | -0.408494651 | 13              |                                                                                                                               |
| VSCC1    | chr2:192,862,976-196,602,592 | CN Gain | 3739617     | q32.3          | 0.331079781  | 6               |                                                                                                                               |
| VSCC1    | chr2:220,345,397-220,439,776 | CN Loss | 94380       | q35            | -0.33531031  | 9               |                                                                                                                               |
| VSCC1    | chr2:232,378,212-233,028,197 | CN Loss | 649986      | q37.1          | -0.712581456 | 13              |                                                                                                                               |
| VSCC1    | chr2:3,802,046-6,900,761     | CN Gain | 3098716     | p25.3 - p25.2  | 0.30153574   | 14              |                                                                                                                               |

|       |                              |         |          |                 |              |     |                                                  |
|-------|------------------------------|---------|----------|-----------------|--------------|-----|--------------------------------------------------|
| VSCC1 | chr20:27,500,000-36,500,434  | CN Gain | 9000435  | q11.1 - q11.23  | 0.345989823  | 137 | <i>ASXL1</i>                                     |
| VSCC1 | chr20:3,847,585-26,174,104   | CN Gain | 22326520 | p13 - p11.1     | 0.34340781   | 168 |                                                  |
| VSCC1 | chr20:36,997,694-39,775,711  | CN Gain | 2778018  | q11.23 - q12    | 0.362661153  | 26  | <i>MAFB, TOP1, PLCG1</i>                         |
| VSCC1 | chr20:45,261,854-60,714,077  | CN Gain | 15452224 | q13.12 - q13.33 | 0.352424681  | 143 | <i>NFATC2, GNAS</i>                              |
| VSCC1 | chr21:16,340,016-26,969,728  | CN Gain | 10629713 | q11.2 - q21.3   | 0.312717974  | 33  |                                                  |
| VSCC1 | chr3:117,585,411-151,174,914 | CN Gain | 33589504 | q13.32 - q25.1  | 0.672168136  | 305 | <i>GATA2, RPN1, ZNF9, FOXL2, ATR, WWTR1</i>      |
| VSCC1 | chr3:151,174,914-153,912,405 | CN Gain | 2737492  | q25.1 - q25.2   | 1.143823862  | 17  |                                                  |
| VSCC1 | chr3:153,912,405-172,224,391 | CN Gain | 18311987 | q25.2 - q26.31  | 0.952926517  | 106 | <i>GMPS, MLF1, EVI1, MDS1</i>                    |
| VSCC1 | chr3:172,224,391-178,916,664 | CN Gain | 6692274  | q26.31 - q26.32 | 1.111941814  | 24  | <i>TBLIXR1, PIK3CA</i>                           |
| VSCC1 | chr3:178,916,664-187,449,591 | CN Gain | 8532928  | q26.32 - q27.3  | 0.910383821  | 113 | <i>PIK3CA, SOX2, MAP3K13, ETV5, EIF4A2, BCL6</i> |
| VSCC1 | chr3:187,449,591-190,282,152 | CN Gain | 2832562  | q27.3 - q28     | 1.119507074  | 19  | <i>BCL6, LPP</i>                                 |
| VSCC1 | chr3:190,282,152-198,022,430 | CN Gain | 7740279  | q28 - q29       | 0.941447794  | 99  | <i>TFRC</i>                                      |
| VSCC1 | chr3:52,507,589-52,563,191   | CN Loss | 55603    | p21.1           | -0.304622382 | 3   |                                                  |
| VSCC1 | chr3:58,898,405-61,633,186   | CN Gain | 2734782  | p14.2           | 0.318645507  | 5   | <i>FHIT</i>                                      |
| VSCC1 | chr4:178,361,412-183,250,815 | CN Gain | 4889404  | q34.3 - q35.1   | 0.374718383  | 7   |                                                  |
| VSCC1 | chr6:101,315,797-129,299,885 | CN Gain | 27984089 | q16.3 - q22.33  | 0.364572436  | 150 | <i>PRDM1, FOXO3A, ROS1, GOPC, RSPO3, PTPRK</i>   |
| VSCC1 | chr7:100,675,569-100,683,499 | CN Loss | 7931     | q22.1           | -0.635455102 | 1   |                                                  |
| VSCC1 | chr9:27,982,997-32,407,196   | CN Gain | 4424200  | p21.2 - p21.1   | 0.371756256  | 6   |                                                  |
| VSCC1 | chr9:65,974,114-70,383,137   | CN Gain | 4409024  | q13 - q21.11    | 0.33840023   | 38  |                                                  |
| VSCC1 | chrX:0-18,606,260            | CN Gain | 18606261 | p22.33 - p22.13 | 0.392317414  | 120 | <i>ZRSR2</i>                                     |
| VSCC1 | chrX:112,066,281-152,610,233 | CN Gain | 40543953 | q23 - q28       | 0.341468275  | 426 | <i>SEPT6, STAG2, ELF4, GPC3, PHF6</i>            |
| VSCC1 | chrX:153,819,322-155,270,560 | CN Gain | 1451239  | q28             | 0.311397433  | 57  | <i>MTCP1</i>                                     |
| VSCC1 | chrX:19,765,721-47,004,723   | CN Gain | 27239003 | p22.12 - p11.23 | 0.36393562   | 130 | <i>BCOR, KDM6A</i>                               |
| VSCC1 | chrX:55,033,758-60,600,000   | CN Gain | 5566243  | p11.21 - q11.1  | 0.369329497  | 27  |                                                  |
| VSCC1 | chrX:61,683,249-70,320,909   | CN Gain | 8637661  | q11.1 - q13.1   | 0.334007323  | 45  | <i>AMER1, MSN, FOXO4</i>                         |
| VSCC1 | chrX:70,470,931-90,596,392   | CN Gain | 20125462 | q13.1 - q21.31  | 0.333683938  | 111 | <i>NONO, ATRX</i>                                |

|       |                               |         |          |                 |              |     |                                                                          |
|-------|-------------------------------|---------|----------|-----------------|--------------|-----|--------------------------------------------------------------------------|
| VSCC2 | chr1:144,214,303-163,452,238  | CN Gain | 19237936 | q21.1 - q23.3   | 0.831506729  | 522 | <i>PDE4DIP, BCL9, ARNT, TPM3, LMNA, PRCC, NTRK1, IRTA1, SDHC, FCGR2B</i> |
| VSCC2 | chr1:80,337,782-107,950,277   | CN Loss | 27612496 | p31.1 - p13.3   | -0.288345486 | 175 | <i>BCL10, RPL5</i>                                                       |
| VSCC2 | chr10:27,204,093-27,702,089   | CN Loss | 497997   | p12.1           | -0.357753068 | 8   |                                                                          |
| VSCC2 | chr11:101,762,008-103,349,792 | CN Loss | 1587785  | q22.1 - q22.3   | -0.359815538 | 21  | <i>BIRC3</i>                                                             |
| VSCC2 | chr11:2,966,637-28,669,631    | CN Loss | 25702995 | p15.4 - p14.1   | -0.390057445 | 306 | <i>CARS, NUP98, LMO1, MYOD1, FANCF</i>                                   |
| VSCC2 | chr11:67,046,975-67,821,278   | CN Gain | 774304   | q13.2           | 0.315124556  | 38  |                                                                          |
| VSCC2 | chr12:0-2,933,082             | CN Gain | 2933083  | p13.33          | 0.409599066  | 35  | <i>KDM5A, ERC1</i>                                                       |
| VSCC2 | chr12:44,781,946-51,442,915   | CN Gain | 6660970  | q12 - q13.12    | 0.447244406  | 108 | <i>ARID2, COL2A1, KMT2D, SMARCD1, ATF1</i>                               |
| VSCC2 | chr12:51,442,915-52,039,224   | CN Gain | 596310   | q13.12 - q13.13 | 1.098302126  | 11  |                                                                          |
| VSCC2 | chr12:57,487,171-57,597,186   | CN Gain | 110016   | q13.3           | 0.300538242  | 5   | <i>NAB2, STAT6</i>                                                       |
| VSCC2 | chr13:20,137,479-28,599,295   | CN Loss | 8461817  | q12.11 - q12.2  | -0.251022607 | 84  | <i>ZNF198, CDX2, FLT3</i>                                                |
| VSCC2 | chr14:91,875,136-92,686,981   | CN Loss | 811846   | q32.11 - q32.12 | -0.309118301 | 9   | <i>TRIP11</i>                                                            |
| VSCC2 | chr14:96,757,141-97,347,301   | CN Loss | 590161   | q32.2           | -0.361880958 | 6   |                                                                          |
| VSCC2 | chr15:74,752,951-102,531,392  | CN Gain | 27778442 | q24.1 - q26.3   | 0.453130662  | 322 | <i>NTRK3, IDH2, CRTCC3, BLM</i>                                          |
| VSCC2 | chr16:25,043,257-25,909,292   | CN Gain | 866036   | p12.1           | 0.405352905  | 8   |                                                                          |
| VSCC2 | chr16:46,508,187-47,730,294   | CN Loss | 1222108  | q11.2 - q12.1   | -0.316109568 | 13  |                                                                          |
| VSCC2 | chr16:67,692,671-67,981,434   | CN Gain | 288764   | q22.1           | 0.336330593  | 17  |                                                                          |
| VSCC2 | chr16:75,688,109-77,199,904   | CN Loss | 1511796  | q23.1           | -0.316109568 | 4   |                                                                          |
| VSCC2 | chr17:26,499,608-27,228,021   | CN Gain | 728414   | q11.2           | 1.08811897   | 43  |                                                                          |
| VSCC2 | chr17:42,274,932-45,405,624   | CN Gain | 3130693  | q21.31 - q21.32 | 0.458407626  | 75  |                                                                          |
| VSCC2 | chr17:45,734,357-48,776,922   | CN Gain | 3042566  | q21.32 - q21.33 | 0.457236737  | 96  | <i>SPOP, COL1A1</i>                                                      |
| VSCC2 | chr17:54,707,390-66,864,295   | CN Gain | 12156906 | q22 - q24.2     | 0.395912305  | 172 | <i>MSI2, RNF43, CLTC, BRIP1, CD79B, DDX5, AXIN2, PRKARIA</i>             |
| VSCC2 | chr17:67,401,626-81,195,210   | CN Gain | 13793585 | q24.3 - q25.3   | 0.499943644  | 279 | <i>H3F3B, SRSF2, MSF, CANT1, ALO17, ASPSCR1</i>                          |
| VSCC2 | chr18:2,796,420-8,604,752     | CN Gain | 5808333  | p11.32 - p11.22 | 0.437776417  | 37  |                                                                          |

|       |                              |         |          |                 |              |     |                                                         |
|-------|------------------------------|---------|----------|-----------------|--------------|-----|---------------------------------------------------------|
| VSCC2 | chr19:20,369,691-24,624,361  | CN Loss | 4254671  | p12 - p11       | -0.7375018   | 44  |                                                         |
| VSCC2 | chr2:108,627,142-116,573,219 | CN Loss | 7946078  | q12.3 - q14.1   | -0.177333012 | 102 | <i>RANBP2, TTL, PAX8</i>                                |
| VSCC2 | chr2:163,871,190-166,870,097 | CN Loss | 2998908  | q24.3           | -0.311112344 | 15  |                                                         |
| VSCC2 | chr2:215,595,265-239,103,538 | CN Loss | 23508274 | q35 - q37.3     | -0.169623464 | 241 | <i>ATIC, FEV, PAX3, ACSL3</i>                           |
| VSCC2 | chr2:57,948,509-75,919,158   | CN Loss | 17970650 | p16.1 - p12     | -0.197939381 | 178 | <i>BCL11A, REL, XPO1, DCTN1</i>                         |
| VSCC2 | chr21:14,403,278-23,124,637  | CN Loss | 8721360  | q11.2 - q21.1   | -0.308620304 | 37  |                                                         |
| VSCC2 | chr21:37,470,806-42,394,800  | CN Gain | 4923995  | q22.12 - q22.2  | 0.845224231  | 47  | <i>ERG</i>                                              |
| VSCC2 | chr21:42,394,800-48,129,895  | CN Loss | 5735096  | q22.2 - q22.3   | -0.538668871 | 131 | <i>TMPRSS2, U2AF1</i>                                   |
| VSCC2 | chr3:121,615,181-159,947,520 | CN Gain | 38332340 | q13.33 - q25.33 | 0.471226603  | 324 | <i>GATA2, RPNI, ZNF9, FOXL2, ATR, WWTR1, GMPS, MLF1</i> |
| VSCC2 | chr3:160,282,987-162,935,202 | CN Gain | 2652216  | q25.33 - q26.1  | 0.461038798  | 9   |                                                         |
| VSCC2 | chr3:162,935,202-183,368,485 | CN Gain | 20433284 | q26.1 - q27.1   | 1.125095189  | 107 | <i>EVII, MDS1, TBLIXR1, PIK3CA, SOX2</i>                |
| VSCC2 | chr4:0-474,945               | CN Loss | 474946   | p16.3           | -0.317111075 | 8   |                                                         |
| VSCC2 | chr4:122,735,017-123,533,771 | CN Loss | 798755   | q27             | -0.384797901 | 7   | <i>IL2</i>                                              |
| VSCC2 | chr4:155,180,746-182,048,327 | CN Loss | 26867582 | q31.3 - q34.3   | -0.311112344 | 102 |                                                         |
| VSCC2 | chr4:186,083,923-187,201,237 | CN Loss | 1117315  | q35.1 - q35.2   | -0.305138439 | 16  |                                                         |
| VSCC2 | chr4:58,909,901-77,357,311   | CN Loss | 18447411 | q12 - q21.1     | -0.323135227 | 118 |                                                         |
| VSCC2 | chr5:0-23,884,365            | CN Gain | 23884366 | p15.33 - p14.2  | 0.594580531  | 130 | <i>TERT</i>                                             |
| VSCC2 | chr5:166,808,587-180,915,260 | CN Gain | 14106674 | q34 - q35.3     | 0.437182605  | 186 | <i>RANBP17, TLX3, NPM1, FGFR4, NSD1</i>                 |
| VSCC2 | chr5:31,552,901-43,107,793   | CN Gain | 11554893 | p13.3 - p12     | 0.29694432   | 87  | <i>IL7R, LIFR</i>                                       |
| VSCC2 | chr6:133,897,096-135,506,933 | CN Gain | 1609838  | q23.2 - q23.3   | 0.467160225  | 14  | <i>MYB</i>                                              |
| VSCC2 | chr6:61,000,000-88,311,671   | CN Loss | 27311672 | q11.1 - q15     | -0.30216074  | 107 |                                                         |
| VSCC2 | chr7:91,458,668-97,558,836   | CN Loss | 6100169  | q21.2 - q21.3   | -0.323638082 | 50  | <i>AKAP9, CDK6</i>                                      |
| VSCC2 | chr7:99,686,697-99,758,403   | CN Gain | 71707    | q22.1           | 0.301513836  | 13  |                                                         |
| VSCC2 | chr8:13,424,563-18,725,312   | CN Loss | 5300750  | p22             | -0.314610735 | 24  | <i>PCMI</i>                                             |
| VSCC2 | chr8:144,990,988-145,749,257 | CN Gain | 758270   | q24.3           | 0.299560279  | 48  | <i>RECQL4</i>                                           |
| VSCC2 | chr8:38,854,391-39,771,274   | CN Loss | 916884   | p11.22 - p11.21 | -0.377466559 | 8   |                                                         |
| VSCC2 | chr8:86,388,040-86,944,458   | CN Gain | 556419   | q21.2 - q21.3   | 0.391934425  | 11  |                                                         |

|       |                               |         |          |                |              |     |                                                                      |
|-------|-------------------------------|---------|----------|----------------|--------------|-----|----------------------------------------------------------------------|
| VSCC2 | chr9:24,346,195-27,062,859    | CN Loss | 2716665  | p21.3 - p21.2  | -0.36343205  | 9   |                                                                      |
| VSCC2 | chrX:0-60,600,000             | CN Loss | 60600001 | p22.33 - q11.1 | -0.550398111 | 500 | <i>ZRSR2, BCOR, KDM6A, SSX1, SSX4, WAS, GATA1, TFE3, SSX2, KDM5C</i> |
| VSCC2 | chrX:61,691,693-70,317,626    | CN Loss | 8625934  | q11.1 - q13.1  | -0.328678936 | 45  | <i>AMER1, MSN, FOXO4</i>                                             |
| VSCC2 | chrX:70,597,535-155,270,560   | CN Loss | 84673026 | q13.1 - q28    | -0.537501156 | 797 | <i>ATRX, SEPT6, STAG2, ELF4, GPC3, PHF6, ATP2B3, RPL10, MTCP1</i>    |
| VSCC3 | chr10:107,022,126-111,631,448 | CN Loss | 4609323  | q25.1          | -0.316643208 | 6   |                                                                      |
| VSCC3 | chr10:115,515,052-115,991,284 | CN Gain | 476233   | q25.3          | 0.350899875  | 8   |                                                                      |
| VSCC3 | chr10:99,426,757-99,439,452   | CN Loss | 12696    | q24.2          | -3.712858319 | 2   |                                                                      |
| VSCC3 | chr11:102,167,034-103,182,663 | CN Gain | 1015630  | q22.2 - q22.3  | 0.379530221  | 17  | <i>BIRC3</i>                                                         |
| VSCC3 | chr11:36,680,649-43,340,010   | CN Loss | 6659362  | p12            | -0.33798112  | 10  |                                                                      |
| VSCC3 | chr11:96,124,552-99,487,602   | CN Loss | 3363051  | q21 - q22.1    | -0.362111747 | 4   |                                                                      |
| VSCC3 | chr12:122,958,082-123,109,213 | CN Gain | 151132   | q24.31         | 0.302285224  | 3   | <i>ZCCHC8</i>                                                        |
| VSCC3 | chr12:20,769,167-22,213,724   | CN Gain | 1444558  | p12.2 - p12.1  | 0.327798545  | 16  |                                                                      |
| VSCC3 | chr12:80,550,305-81,072,483   | CN Gain | 522179   | q21.31         | 0.493563473  | 2   |                                                                      |
| VSCC3 | chr13:0-17,900,000            | CN Loss | 17900001 | p13 - q11      | -3.557076573 | 0   |                                                                      |
| VSCC3 | chr13:53,624,637-71,185,270   | CN Loss | 17560634 | q14.3 - q21.33 | -0.300354749 | 63  |                                                                      |
| VSCC3 | chr13:94,830,408-103,506,151  | CN Gain | 8675744  | q31.3 - q33.1  | 0.533793867  | 75  | <i>ERCC5</i>                                                         |
| VSCC3 | chr14:17,600,000-20,137,759   | CN Loss | 2537760  | q11.1 - q11.2  | -0.459351391 | 17  |                                                                      |
| VSCC3 | chr14:22,102,387-23,020,809   | CN Gain | 918423   | q11.2          | 0.411985874  | 3   |                                                                      |
| VSCC3 | chr14:39,871,656-44,973,731   | CN Loss | 5102076  | q21.1 - q21.2  | -0.354706973 | 4   |                                                                      |
| VSCC3 | chr14:44,973,731-45,759,229   | CN Gain | 785499   | q21.2          | 0.316495642  | 11  |                                                                      |
| VSCC3 | chr14:45,759,229-50,065,702   | CN Loss | 4306474  | q21.2 - q21.3  | -0.326266557 | 7   |                                                                      |
| VSCC3 | chr14:82,030,804-88,210,126   | CN Loss | 6179323  | q31.1 - q31.3  | -0.369140282 | 7   |                                                                      |
| VSCC3 | chr14:88,857,100-89,338,598   | CN Gain | 481499   | q31.3          | 0.304881766  | 5   |                                                                      |
| VSCC3 | chr14:97,410,780-99,636,443   | CN Loss | 2225664  | q32.2          | -0.394645721 | 6   |                                                                      |
| VSCC3 | chr16:18,791,246-21,273,487   | CN Gain | 2482242  | p12.3 - p12.2  | 0.41005519   | 35  |                                                                      |
| VSCC3 | chr16:3,869,872-3,999,870     | CN Loss | 129999   | p13.3          | -3.486577749 | 2   | <i>CREBBP</i>                                                        |
| VSCC3 | chr16:46,509,775-53,741,994   | CN Gain | 7232220  | q11.2 - q12.2  | 0.400849044  | 54  | <i>CYLD</i>                                                          |
| VSCC3 | chr16:71,186,667-85,132,727   | CN Gain | 13946061 | q22.2 - q24.1  | 0.30488506   | 118 | <i>MAF</i>                                                           |

|       |                              |         |          |                 |              |     |                                                                                  |
|-------|------------------------------|---------|----------|-----------------|--------------|-----|----------------------------------------------------------------------------------|
| VSCC3 | chr17:43,381,188-44,791,168  | CN Loss | 1409981  | q21.31          | -0.406505853 | 26  |                                                                                  |
| VSCC3 | chr17:66,864,354-67,305,459  | CN Gain | 441106   | q24.2 - q24.3   | 0.390101343  | 9   |                                                                                  |
| VSCC3 | chr18:0-34,840,647           | CN Gain | 34840648 | p11.32 - q12.2  | 0.463160649  | 206 | <i>ZNF521, SS18</i>                                                              |
| VSCC3 | chr18:39,330,326-78,077,248  | CN Gain | 38746923 | q12.3 - q23     | 0.395491466  | 200 | <i>SETBP1, MALT1, BCL2, FVT1</i>                                                 |
| VSCC3 | chr19:11,796,133-12,739,529  | CN Gain | 943397   | p13.2           | 0.362427443  | 28  |                                                                                  |
| VSCC3 | chr19:14,736,266-15,218,287  | CN Gain | 482022   | p13.12          | 0.318047345  | 13  |                                                                                  |
| VSCC3 | chr19:32,746,984-33,701,473  | CN Gain | 954490   | q13.11          | 0.426142961  | 17  | <i>CEP89</i>                                                                     |
| VSCC3 | chr19:34,890,363-35,449,840  | CN Gain | 559478   | q13.11          | 0.370211899  | 15  |                                                                                  |
| VSCC3 | chr19:36,792,499-38,386,037  | CN Gain | 1593539  | q13.12 - q13.13 | 0.417281628  | 43  |                                                                                  |
| VSCC3 | chr19:4,218,926-4,275,285    | CN Loss | 56360    | p13.3           | -3.497965693 | 3   |                                                                                  |
| VSCC3 | chr19:44,302,608-45,016,141  | CN Gain | 713534   | q13.31          | 0.522892118  | 25  |                                                                                  |
| VSCC3 | chr19:52,222,875-54,291,184  | CN Gain | 2068310  | q13.41 - q13.42 | 0.369896114  | 115 | <i>PPP2RIA, ZNF331</i>                                                           |
| VSCC3 | chr19:56,228,276-58,491,366  | CN Gain | 2263091  | q13.42 - q13.43 | 0.36765939   | 74  |                                                                                  |
| VSCC3 | chr19:8,944,208-9,869,227    | CN Gain | 925020   | p13.2           | 0.455224812  | 23  |                                                                                  |
| VSCC3 | chr2:186,603,295-186,697,910 | CN Gain | 94616    | q32.1           | 0.576162189  | 3   |                                                                                  |
| VSCC3 | chr2:193,067,774-196,545,384 | CN Loss | 3477611  | q32.3           | -0.41076538  | 4   |                                                                                  |
| VSCC3 | chr2:20,870,201-21,511,337   | CN Gain | 641137   | p24.1           | 0.326788574  | 4   |                                                                                  |
| VSCC3 | chr2:234,978,726-236,571,332 | CN Loss | 1592607  | q37.1 - q37.2   | -0.366241992 | 6   |                                                                                  |
| VSCC3 | chr2:3,698,900-3,698,941     | CN Loss | 42       | p25.3           | -3.88649869  | 0   |                                                                                  |
| VSCC3 | chr2:3,698,941-6,909,505     | CN Loss | 3210565  | p25.3 - p25.2   | -0.358816028 | 15  |                                                                                  |
| VSCC3 | chr2:33,904,806-36,567,945   | CN Loss | 2663140  | p22.3           | -0.373721704 | 5   |                                                                                  |
| VSCC3 | chr20:0-21,402,481           | CN Gain | 21402482 | p13 - p11.22    | 0.327820107  | 202 |                                                                                  |
| VSCC3 | chr20:47,465,498-58,744,996  | CN Gain | 11279499 | q13.13 - q13.33 | 0.3293529    | 118 | <i>NFATC2, GNAS</i>                                                              |
| VSCC3 | chr21:0-13,200,000           | CN Loss | 13200001 | p13 - q11.1     | -0.324332967 | 11  |                                                                                  |
| VSCC3 | chr22:14,700,000-17,039,361  | CN Loss | 2339362  | q11.1           | -0.617741346 | 8   |                                                                                  |
| VSCC3 | chr3:163,399,475-198,022,430 | CN Gain | 34622956 | q26.1 - q29     | 1.561671853  | 298 | <i>EVII, MDS1, TBL1XR1, PIK3CA, SOX2, MAP3K13, ETV5, EIF4A2, BCL6, LPP, TFRC</i> |
| VSCC3 | chr3:59,048,664-62,113,511   | CN Loss | 3064848  | p14.2           | -0.335556433 | 3   | <i>FHIT</i>                                                                      |
| VSCC3 | chr4:122,731,123-123,895,961 | CN Gain | 1164839  | q27 - q28.1     | 0.336232543  | 14  | <i>IL2</i>                                                                       |

|       |                              |         |          |                 |              |     |                                                                                                |
|-------|------------------------------|---------|----------|-----------------|--------------|-----|------------------------------------------------------------------------------------------------|
| VSCC3 | chr4:130,057,571-138,442,456 | CN Loss | 8384886  | q28.2 - q28.3   | -0.306289822 | 9   |                                                                                                |
| VSCC3 | chr4:178,931,218-183,574,849 | CN Loss | 4643632  | q34.3 - q35.1   | -0.403107285 | 4   |                                                                                                |
| VSCC3 | chr4:187,731,694-191,154,276 | CN Loss | 3422583  | q35.2           | -0.337176993 | 12  | <i>DUX4</i>                                                                                    |
| VSCC3 | chr4:57,899,384-68,265,885   | CN Loss | 10366502 | q12 - q13.2     | -0.300745577 | 14  |                                                                                                |
| VSCC3 | chr4:70,504,845-71,114,951   | CN Gain | 610107   | q13.3           | 0.546812117  | 15  |                                                                                                |
| VSCC3 | chr5:127,420,265-127,730,918 | CN Gain | 310654   | q23.3           | 0.310067624  | 2   |                                                                                                |
| VSCC3 | chr5:162,972,354-167,140,774 | CN Loss | 4168421  | q34             | -0.375370383 | 5   |                                                                                                |
| VSCC3 | chr5:68,809,861-70,735,482   | CN Loss | 1925622  | q13.2           | -0.680656761 | 28  |                                                                                                |
| VSCC3 | chr5:83,563,778-86,564,811   | CN Loss | 3001034  | q14.3           | -0.305632755 | 9   |                                                                                                |
| VSCC3 | chr5:89,608,904-90,144,497   | CN Gain | 535594   | q14.3           | 0.411985874  | 6   |                                                                                                |
| VSCC3 | chr6:116,757,727-117,737,450 | CN Gain | 979724   | q22.1           | 0.32703951   | 14  | <i>ROSI</i>                                                                                    |
| VSCC3 | chr6:28,554,161-34,760,075   | CN Loss | 6205915  | p22.1 - p21.31  | -0.755047977 | 274 | <i>TRIM27, HLA-A, POU5F1, DAXX, HMGA1</i>                                                      |
| VSCC3 | chr6:56,330,928-56,569,107   | CN Gain | 238180   | p12.1           | 0.515278667  | 1   |                                                                                                |
| VSCC3 | chr8:110,257,556-110,587,471 | CN Gain | 329916   | q23.1 - q23.2   | 0.355086327  | 5   |                                                                                                |
| VSCC3 | chr8:126,178,743-130,763,786 | CN Loss | 4585044  | q24.13 - q24.21 | -0.317043394 | 29  | <i>MYC</i>                                                                                     |
| VSCC3 | chr8:20,107,689-21,769,453   | CN Loss | 1661765  | p21.3           | -0.375808373 | 8   |                                                                                                |
| VSCC3 | chr8:86,392,728-87,060,807   | CN Loss | 668080   | q21.2 - q21.3   | -0.817127138 | 12  |                                                                                                |
| VSCC3 | chr9:123,678,863-124,064,402 | CN Gain | 385540   | q33.2           | 0.311623096  | 6   | <i>CEP1</i>                                                                                    |
| VSCC3 | chr9:27,950,510-32,352,676   | CN Loss | 4402167  | p21.2 - p21.1   | -0.313451618 | 5   |                                                                                                |
| VSCC3 | chr9:38,621,844-70,972,261   | CN Loss | 32350418 | p13.1 - q21.11  | -0.64307642  | 108 |                                                                                                |
| VSCC3 | chr9:8,528,695-12,137,422    | CN Loss | 3608728  | p24.1 - p23     | -0.377036303 | 4   |                                                                                                |
| VSCC3 | chrX:0-2,700,085             | CN Loss | 2700086  | p22.33          | -0.926882446 | 24  |                                                                                                |
| VSCC3 | chrX:60,600,000-62,570,007   | CN Loss | 1970008  | q11.1           | -1.009012818 | 1   |                                                                                                |
| VSCC3 | chrX:73,040,694-73,071,815   | CN Gain | 31122    | q13.2           | 0.45803073   | 2   |                                                                                                |
| VSCC4 | chr1:31,188,045-83,713,041   | CN Gain | 52524997 | p35.2 - p31.1   | 0.349110693  | 528 | <i>LCK, SFPQ, THRAP3, CSF3R, MYCL1, MPL, MUTYH, TAL1, SIL, CDKN2C, EPS15, JUN, JAK1, FUBP1</i> |

|       |                               |         |          |                |              |     |                                                                                                                        |
|-------|-------------------------------|---------|----------|----------------|--------------|-----|------------------------------------------------------------------------------------------------------------------------|
| VSCC4 | chr1:6,234,603-29,601,972     | CN Gain | 23367370 | p36.31 - p35.3 | 0.331376463  | 447 | <i>RPL22, CAMTA1, SPEN, SDHB, PAX7, MDS2, ARID1A</i>                                                                   |
| VSCC4 | chr11:68,937,235-71,184,306   | CN Gain | 2247072  | q13.3 - q13.4  | 1.20145309   | 23  | <i>CCND1</i>                                                                                                           |
| VSCC4 | chr11:71,184,306-73,850,692   | CN Gain | 2666387  | q13.4          | 0.309401006  | 50  | <i>NUMA1</i>                                                                                                           |
| VSCC4 | chr11:73,850,692-135,006,516  | CN Loss | 61155825 | q13.4 - q25    | -0.491593271 | 545 | <i>PICALM, MAML2, BIRC3, ATM, DDX10, POU2AF1, SDHD, ZNF145, PAFAH1B2, PCSK7, MLL, DDX6, CBL, ARHGEF12, FLI1, KCNJ5</i> |
| VSCC4 | chr13:100,336,156-115,169,878 | CN Gain | 14833723 | q32.3 - q34    | 0.316763401  | 121 | <i>ERCC5</i>                                                                                                           |
| VSCC4 | chr18:18,517,121-34,874,055   | CN Gain | 16356935 | q11.1 - q12.2  | 0.382344306  | 94  | <i>ZNF521, SS18</i>                                                                                                    |
| VSCC4 | chr18:43,422,074-45,567,137   | CN Gain | 2145064  | q12.3 - q21.1  | 0.370169416  | 25  |                                                                                                                        |
| VSCC4 | chr18:46,645,092-47,957,549   | CN Gain | 1312458  | q21.1          | 0.364693522  | 18  |                                                                                                                        |
| VSCC4 | chr18:5,751,735-17,200,000    | CN Gain | 11448266 | p11.31 - q11.1 | 0.343222141  | 73  |                                                                                                                        |
| VSCC4 | chr18:51,690,882-67,872,291   | CN Gain | 16181410 | q21.2 - q22.2  | 0.374027178  | 78  | <i>MALT1, BCL2, FVT1</i>                                                                                               |
| VSCC4 | chr3:118,644,873-122,512,323  | CN Gain | 3867451  | q13.32 - q21.1 | 0.384575397  | 52  |                                                                                                                        |
| VSCC4 | chr3:124,211,488-125,492,720  | CN Gain | 1281233  | q21.2          | 0.367274374  | 11  |                                                                                                                        |
| VSCC4 | chr3:130,098,452-133,494,190  | CN Gain | 3395739  | q22.1          | 0.380748048  | 28  |                                                                                                                        |
| VSCC4 | chr3:135,550,006-172,737,751  | CN Gain | 37187746 | q22.2 - q26.31 | 0.374347985  | 236 | <i>FOXL2, ATR, WWTR1, GMPS, MLF1, EVI1, MDS1</i>                                                                       |
| VSCC4 | chr3:178,916,736-198,022,430  | CN Gain | 19105695 | q26.32 - q29   | 0.359193802  | 228 | <i>PIK3CA, SOX2, MAP3K13, ETV5, EIF4A2, BCL6, LPP, TFRC</i>                                                            |
| VSCC4 | chr3:99,513,730-114,213,812   | CN Gain | 14700083 | q12.1 - q13.31 | 0.370493948  | 107 | <i>TFG, CBLB</i>                                                                                                       |
| VSCC4 | chr5:0-48,400,000             | CN Gain | 48400001 | p15.33 - q11.1 | 0.611056685  | 246 | <i>TERT, IL7R, LIFR</i>                                                                                                |
| VSCC4 | chr5:150,726,840-153,735,573  | CN Loss | 3008734  | q33.1 - q33.2  | -0.477055684 | 18  |                                                                                                                        |
| VSCC4 | chr6:7,298,036-7,609,107      | CN Gain | 311072   | p24.3          | 0.341251984  | 5   |                                                                                                                        |
| VSCC4 | chr7:116,199,672-159,138,663  | CN Loss | 42938992 | q31.2 - q36.3  | -0.492762864 | 386 | <i>MET, POT1, SND1, SMO, CREB3L2, TIF1, KIAA1549, BRAF, FAM131B, EZH2, MLL3, HLXB9</i>                                 |



|       |                               |         |          |                 |              |     |                                                                                                                                                                       |
|-------|-------------------------------|---------|----------|-----------------|--------------|-----|-----------------------------------------------------------------------------------------------------------------------------------------------------------------------|
| VSCC4 | chrX:0-18,209,120             | CN Gain | 18209121 | p22.33 - p22.13 | 0.347150981  | 118 | <i>ZRSR2</i><br><i>PDE4DIP, BCL9, ARNT,</i><br><i>TPM3, LMNA, PRCC, NTRK1,</i><br><i>IRTA1, SDHC, FCGR2B,</i><br><i>PBX1, PMX1, ABL2, TPR,</i><br><i>CDC73, PTPRC</i> |
| VSCC5 | chr1:125,000,000-201,041,979  | CN Gain | 76041980 | q11 - q32.1     | 0.689244449  | 797 |                                                                                                                                                                       |
| VSCC5 | chr1:201,041,979-201,437,520  | CN Gain | 395542   | q32.1           | 1.00828433   | 9   |                                                                                                                                                                       |
| VSCC5 | chr1:201,437,520-249,250,621  | CN Gain | 47813102 | q32.1 - q44     | 0.642110527  | 492 | <i>MDM4, ELK4, SLC45A3,</i><br><i>H3F3A, FH</i>                                                                                                                       |
| VSCC5 | chr10:729,889-1,313,163       | CN Loss | 583275   | p15.3           | -0.712118089 | 10  |                                                                                                                                                                       |
| VSCC5 | chr11:65,265,934-65,272,867   | CN Loss | 6934     | q13.1           | -0.301510751 | 2   | <i>MALAT1</i>                                                                                                                                                         |
| VSCC5 | chr13:111,367,966-114,536,051 | CN Gain | 3168086  | q34             | 0.306811631  | 48  |                                                                                                                                                                       |
| VSCC5 | chr13:96,743,048-101,714,451  | CN Gain | 4971404  | q32.1 - q33.1   | 0.340665251  | 42  |                                                                                                                                                                       |
| VSCC5 | chr14:101,459,488-107,349,540 | CN Gain | 5890053  | q32.31 - q32.33 | 0.346884444  | 138 | <i>HSPCA, AKT1</i>                                                                                                                                                    |
| VSCC5 | chr14:19,054,425-25,443,944   | CN Gain | 6389520  | q11.1 - q12     | 0.404824108  | 183 | <i>CCNB1IP1</i>                                                                                                                                                       |
| VSCC5 | chr14:31,816,937-35,036,893   | CN Gain | 3219957  | q12 - q13.1     | 0.347864032  | 16  |                                                                                                                                                                       |
| VSCC5 | chr14:51,107,569-52,793,971   | CN Gain | 1686403  | q22.1           | 0.355351761  | 18  | <i>NIN</i>                                                                                                                                                            |
| VSCC5 | chr14:64,565,451-78,763,936   | CN Gain | 14198486 | q23.2 - q24.3   | 0.37245968   | 171 | <i>MAX, GPHN, RAD51L1</i><br><i>TRIP11, GOLGA5, DICER1,</i><br><i>TCL6, TCL1A, BCL11B</i>                                                                             |
| VSCC5 | chr14:89,336,478-101,360,861  | CN Gain | 12024384 | q31.3 - q32.2   | 0.34132117   | 129 |                                                                                                                                                                       |
| VSCC5 | chr15:20,087,606-35,149,210   | CN Gain | 15061605 | q11.1 - q14     | 0.371496677  | 292 | <i>C15orf55</i>                                                                                                                                                       |
| VSCC5 | chr15:40,949,518-46,344,182   | CN Gain | 5394665  | q15.1 - q21.1   | 0.371817768  | 112 |                                                                                                                                                                       |
| VSCC5 | chr15:51,289,654-62,165,439   | CN Gain | 10875786 | q21.2 - q22.2   | 0.321844116  | 77  | <i>MYO5A, TCF12</i>                                                                                                                                                   |
| VSCC5 | chr15:62,445,506-94,841,669   | CN Gain | 32396164 | q22.2 - q26.2   | 0.349821091  | 420 | <i>MAP2K1, PML, NTRK3, IDH2,</i><br><i>CRTC3, BLM</i>                                                                                                                 |
| VSCC5 | chr15:98,509,082-102,531,392  | CN Gain | 4022311  | q26.3           | 0.354377329  | 51  |                                                                                                                                                                       |
| VSCC5 | chr19:57,454,348-57,792,166   | CN Loss | 337819   | q13.43          | -0.667283595 | 8   |                                                                                                                                                                       |
| VSCC5 | chr20:0-26,188,858            | CN Gain | 26188859 | p13 - p11.1     | 0.66926977   | 258 |                                                                                                                                                                       |
| VSCC5 | chr20:27,500,000-63,025,520   | CN Gain | 35525521 | q11.1 - q13.33  | 0.686149657  | 508 | <i>ASXL1, MAFB, TOP1, PLCG1,</i><br><i>SDC4, NFATC2, GNAS,</i><br><i>SS18L1</i>                                                                                       |

|       |                              |         |           |                |              |     |                                                                                                    |
|-------|------------------------------|---------|-----------|----------------|--------------|-----|----------------------------------------------------------------------------------------------------|
| VSCC5 | chr21:14,377,581-48,129,895  | CN Gain | 33752315  | q11.2 - q22.3  | 0.647424281  | 353 | <i>OLIG2, RUNX1, ERG, TMPRSS2, U2AF1</i>                                                           |
| VSCC5 | chr3:111,160,342-130,293,179 | CN Gain | 19132838  | q13.13 - q22.1 | 0.34328714   | 209 | <i>GATA2, RPN1, ZNF9</i>                                                                           |
| VSCC5 | chr3:132,572,121-141,162,192 | CN Gain | 8590072   | q22.1 - q23    | 0.341976792  | 63  | <i>FOXL2</i>                                                                                       |
| VSCC5 | chr3:148,793,639-153,847,403 | CN Gain | 5053765   | q24 - q25.2    | 0.310835898  | 51  | <i>WWTR1</i>                                                                                       |
| VSCC5 | chr3:168,546,824-172,428,887 | CN Gain | 3882064   | q26.2 - q26.31 | 0.334748507  | 33  | <i>EVII, MDS1</i>                                                                                  |
| VSCC5 | chr3:182,681,832-198,022,430 | CN Gain | 15340599  | q26.33 - q29   | 0.366027683  | 203 | <i>MAP3K13, ETV5, EIF4A2, BCL6, LPP, TFRC</i>                                                      |
| VSCC5 | chr4:0-120,107,285           | CN Gain | 120107286 | p16.3 - q26    | 0.562213898  | 779 | <i>FGFR3, WHSC1, SLC34A2, ARHH, PHOX2B, FIP1L1, CHIC2, PDGFRA, KIT, KDR, MLLT2, RAP1GDS1, TET2</i> |
| VSCC5 | chr4:151,837,545-155,156,583 | CN Gain | 3319039   | q31.3          | 0.376945078  | 28  | <i>FBXW7</i>                                                                                       |
| VSCC5 | chr4:184,606,496-189,552,085 | CN Gain | 4945590   | q35.1 - q35.2  | 0.351449639  | 43  |                                                                                                    |
| VSCC5 | chr5:0-24,380,671            | CN Gain | 24380672  | p15.33 - p14.2 | 0.313512355  | 131 | <i>TERT</i>                                                                                        |
| VSCC5 | chr5:125,972,168-127,329,368 | CN Gain | 1357201   | q23.2 - q23.3  | 0.393796116  | 8   |                                                                                                    |
| VSCC5 | chr5:130,960,280-161,113,113 | CN Gain | 30152834  | q31.1 - q34    | 0.371817768  | 388 | <i>FACL6, AF5q31, GRAF, PDGFRB, CD74, ITK, EBF1, PWWP2A</i>                                        |
| VSCC5 | chr5:167,478,587-180,915,260 | CN Gain | 13436674  | q34 - q35.3    | 0.367960304  | 186 | <i>RANBP17, TLX3, NPM1, FGFR4, NSD1</i>                                                            |
| VSCC5 | chr5:30,936,750-34,688,160   | CN Gain | 3751411   | p13.3 - p13.2  | 0.343941867  | 20  |                                                                                                    |
| VSCC5 | chr6:80,629,049-171,115,067  | CN Loss | 90486019  | q14.1 - q27    | -0.727167666 | 547 | <i>PRDM1, FOXO3A, ROS1, GOPC, RSPO3, PTPRK, MYB, TNFAIP3, ECT2L, ARID1B, EZR, FGFR1OP, MLLT4</i>   |
| VSCC5 | chr7:0-8,272,268             | CN Gain | 8272269   | p22.3 - p21.3  | 0.348516673  | 114 | <i>CARD11, PMS2, RAC1</i>                                                                          |
| VSCC5 | chr7:17,962,346-47,983,078   | CN Gain | 30020733  | p21.1 - p12.3  | 0.33079052   | 251 | <i>HNRNPA2B1, HOXA9, HOXA11, HOXA13, JAZF1</i>                                                     |
| VSCC5 | chr7:50,444,272-59,900,000   | CN Gain | 9455729   | p12.2 - q11.1  | 0.359566867  | 45  | <i>EGFR</i>                                                                                        |
| VSCC5 | chr7:61,239,329-76,982,887   | CN Gain | 15743559  | q11.1 - q11.23 | 0.407332063  | 181 | <i>SBDS, ELN, HIP1</i>                                                                             |

|       |                               |         |          |                 |              |     |                                                                                            |
|-------|-------------------------------|---------|----------|-----------------|--------------|-----|--------------------------------------------------------------------------------------------|
| VSCC5 | chr7:82,544,209-84,086,089    | CN Gain | 1541881  | q21.11          | 0.319180772  | 3   |                                                                                            |
| VSCC5 | chr7:95,936,122-107,763,541   | CN Gain | 11827420 | q21.3 - q31.1   | 0.378224075  | 200 | <i>TRRAP, CUX1</i>                                                                         |
| VSCC5 | chr8:0-2,876,052              | CN Gain | 2876053  | p23.3 - p23.2   | 0.320456758  | 23  |                                                                                            |
| VSCC5 | chr8:115,902,113-144,358,321  | CN Gain | 28456209 | q23.3 - q24.3   | 0.338367149  | 173 | <i>RAD21, EXT1, MYC, NDRG1</i>                                                             |
| VSCC5 | chr8:145,773,800-146,364,022  | CN Gain | 590223   | q24.3           | 0.400422499  | 14  |                                                                                            |
| VSCC5 | chr8:17,157,464-28,827,966    | CN Gain | 11670503 | p22 - p12       | 0.349820957  | 119 | <i>PCMI</i>                                                                                |
| VSCC5 | chr8:35,581,586-38,853,925    | CN Gain | 3272340  | p12 - p11.22    | 0.368925586  | 32  | <i>WHSC1L1, FGFR1</i>                                                                      |
| VSCC5 | chr8:39,697,766-45,600,000    | CN Gain | 5902235  | p11.22 - q11.1  | 0.368282109  | 36  | <i>RUNXBP2, HOOK3</i>                                                                      |
| VSCC5 | chr8:6,614,867-13,162,598     | CN Gain | 6547732  | p23.1 - p22     | 0.379501909  | 139 |                                                                                            |
| VSCC5 | chr9:79,792,524-80,030,921    | CN Loss | 238398   | q21.2           | -0.326296389 | 2   |                                                                                            |
| VSCC6 | chr12:88,321,898-88,589,283   | CN Loss | 267386   | q21.32          | -0.302119613 | 4   |                                                                                            |
| VSCC6 | chr13:103,383,432-103,492,272 | CN Loss | 108841   | q33.1           | -0.314054742 | 5   |                                                                                            |
| VSCC6 | chr16:46,388,373-46,432,775   | CN Gain | 44403    | q11.2           | 0.407117203  | 0   |                                                                                            |
| VSCC6 | chr7:66,843,275-69,064,853    | CN Gain | 2221579  | q11.21 - q11.22 | 0.373861328  | 3   |                                                                                            |
| VSCC7 | chr10:99,426,796-99,507,934   | CN Loss | 81139    | q24.2           | -0.548555255 | 4   |                                                                                            |
| VSCC7 | chr12:49,373,202-49,503,433   | CN Loss | 130232   | q13.12          | -0.327695087 | 7   | <i>KMT2D</i>                                                                               |
| VSCC7 | chr16:36,600,000-46,439,003   | CN Loss | 9839004  | q11.1 - q11.2   | -1.107589364 | 0   |                                                                                            |
| VSCC7 | chr18:0-818,960               | CN Gain | 818961   | p11.32          | 0.44099319   | 13  |                                                                                            |
| VSCC7 | chr2:193,416,464-196,581,520  | CN Loss | 3165057  | q32.3           | -0.306397185 | 4   |                                                                                            |
| VSCC7 | chr2:3,691,065-3,698,947      | CN Loss | 7883     | p25.3           | -0.643787771 | 1   |                                                                                            |
| VSCC7 | chr3:46,704,360-52,570,719    | CN Loss | 5866360  | p21.31 - p21.1  | -0.300908804 | 179 | <i>SETD2, AF3p21, RHOA, BAP1</i>                                                           |
| VSCC7 | chr3:81,792,616-87,027,712    | CN Loss | 5235097  | p12.2 - p12.1   | -0.446530044 | 8   |                                                                                            |
| VSCC7 | chr7:0-59,900,000             | CN Gain | 59900001 | p22.3 - q11.1   | 0.424497843  | 448 | <i>CARD11, PMS2, RAC1, ETV1,<br/>HNRNPA2B1, HOXA9,<br/>HOXA11, HOXA13, JAZF1,<br/>EGFR</i> |
| VSCC7 | chr8:145,918,761-146,364,022  | CN Gain | 445262   | q24.3           | 0.402012736  | 13  |                                                                                            |

|       |                               |         |          |                 |              |     |                                                                                                             |
|-------|-------------------------------|---------|----------|-----------------|--------------|-----|-------------------------------------------------------------------------------------------------------------|
| VSCC7 | chr8:46,842,188-143,356,197   | CN Gain | 96514010 | q11.1 - q24.3   | 0.441264093  | 510 | <i>TCEA1, PLAG1, CHCHD7, NCOA2, HEY1, NBS1, CBFA2T1, COX6C, UBR5, RSPO2, EIF3E, RAD21, EXT1, MYC, NDRG1</i> |
| VSCC7 | chr9:32,418,370-33,311,087    | CN Gain | 892718   | p21.1 - p13.3   | 0.333558619  | 16  |                                                                                                             |
| VSCC7 | chrX:0-2,700,055              | CN Loss | 2700056  | p22.33          | -0.404881239 | 24  |                                                                                                             |
| VSCC7 | chrX:61,686,735-62,569,812    | CN Loss | 883078   | q11.1           | -0.99558115  | 1   |                                                                                                             |
| VSCC8 | chr1:11,134,279-11,319,365    | CN Gain | 185087   | p36.22          | 0.537486196  | 5   |                                                                                                             |
| VSCC8 | chr1:12,302,672-14,167,668    | CN Gain | 1864997  | p36.22 - p36.21 | 0.447926849  | 61  |                                                                                                             |
| VSCC8 | chr1:121,306,522-144,841,323  | CN Loss | 23534802 | p11.2 - q21.1   | -0.482486844 | 18  |                                                                                                             |
| VSCC8 | chr1:158,153,799-159,718,034  | CN Gain | 1564236  | q23.1 - q23.2   | 0.432827771  | 34  |                                                                                                             |
| VSCC8 | chr1:162,467,647-163,310,129  | CN Gain | 842483   | q23.3           | 0.419673756  | 9   |                                                                                                             |
| VSCC8 | chr1:169,057,831-171,303,737  | CN Gain | 2245907  | q24.2 - q24.3   | 0.42809169   | 29  | <i>PMX1</i>                                                                                                 |
| VSCC8 | chr1:185,082,766-186,948,195  | CN Gain | 1865430  | q25.3 - q31.1   | 0.509445578  | 15  | <i>TPR</i>                                                                                                  |
| VSCC8 | chr1:196,250,021-197,668,338  | CN Gain | 1418318  | q31.3           | 0.530859172  | 13  |                                                                                                             |
| VSCC8 | chr1:200,522,411-200,842,533  | CN Gain | 320123   | q32.1           | 0.513036907  | 5   |                                                                                                             |
| VSCC8 | chr1:206,970,324-207,990,603  | CN Gain | 1020280  | q32.1 - q32.2   | 0.353942901  | 19  |                                                                                                             |
| VSCC8 | chr1:23,111,233-27,278,079    | CN Gain | 4166847  | p36.12 - p36.11 | 0.333779126  | 94  | <i>MDS2, ARID1A</i>                                                                                         |
| VSCC8 | chr1:32,608,543-79,564,483    | CN Gain | 46955941 | p35.1 - p31.1   | 0.4333148    | 495 | <i>LCK, SFPQ, THRAP3, CSF3R, MYCL1, MPL, MUTYH, TAL1, SIL, CDKN2C, EPS15, JUN, JAK1, FUBP1</i>              |
| VSCC8 | chr1:7,797,405-8,075,484      | CN Gain | 278080   | p36.23          | 0.593844593  | 7   | <i>CAMTA1</i>                                                                                               |
| VSCC8 | chr1:9,994,818-10,490,227     | CN Gain | 495410   | p36.22          | 0.547806323  | 10  |                                                                                                             |
| VSCC8 | chr10:130,004,602-135,534,747 | CN Loss | 5530146  | q26.2 - q26.3   | -0.687700629 | 48  |                                                                                                             |
| VSCC8 | chr10:45,003,357-60,028,976   | CN Loss | 15025620 | q11.21 - q21.1  | -0.470913455 | 110 |                                                                                                             |
| VSCC8 | chr10:70,978,549-74,518,238   | CN Loss | 3539690  | q22.1           | -0.551135421 | 42  | <i>PRF1</i>                                                                                                 |
| VSCC8 | chr10:75,305,318-89,265,108   | CN Loss | 13959791 | q22.2 - q23.2   | -0.480700225 | 111 | <i>MYST4, NUTM2B, BMPR1A, NUTM2A</i>                                                                        |
| VSCC8 | chr10:98,114,988-99,424,744   | CN Loss | 1309757  | q24.1 - q24.2   | -0.419951379 | 24  |                                                                                                             |

|       |                               |         |          |                |              |     |                                                    |
|-------|-------------------------------|---------|----------|----------------|--------------|-----|----------------------------------------------------|
| VSCC8 | chr10:99,424,744-99,623,823   | CN Loss | 199080   | q24.2          | -3.250168562 | 7   |                                                    |
| VSCC8 | chr10:99,623,823-105,495,635  | CN Loss | 5871813  | q24.2 - q24.33 | -0.440207064 | 103 | <i>TLX1, NFKB2, SUFU, NT5C2</i>                    |
| VSCC8 | chr11:0-4,120,989             | CN Loss | 4120990  | p15.5 - p15.4  | -0.718951523 | 131 | <i>HRAS, CARS, NUP98</i>                           |
| VSCC8 | chr11:102,206,872-103,194,617 | CN Gain | 987746   | q22.2 - q22.3  | 0.368281081  | 17  | <i>BIRC3</i>                                       |
| VSCC8 | chr11:17,393,887-17,793,659   | CN Loss | 399773   | p15.1          | -0.511385053 | 8   | <i>MYOD1</i>                                       |
| VSCC8 | chr11:44,255,584-46,760,571   | CN Loss | 2504988  | p11.2          | -0.570005536 | 35  | <i>EXT2, CREB3L1</i>                               |
| VSCC8 | chr11:46,907,660-47,652,070   | CN Loss | 744411   | p11.2          | -0.498666793 | 23  | <i>DDB2</i>                                        |
| VSCC8 | chr11:53,700,000-56,844,408   | CN Gain | 3144409  | q11 - q12.1    | 0.358441174  | 55  |                                                    |
| VSCC8 | chr11:6,238,792-6,736,376     | CN Loss | 497585   | p15.4          | -0.466486365 | 18  |                                                    |
| VSCC8 | chr11:67,048,162-67,817,590   | CN Loss | 769429   | q13.2          | -0.336395353 | 37  |                                                    |
| VSCC8 | chr12:105,589,227-112,642,182 | CN Loss | 7052956  | q23.3 - q24.13 | -0.386114463 | 91  | <i>SH2B3, ALDH2</i>                                |
| VSCC8 | chr12:122,700,862-123,311,043 | CN Gain | 610182   | q24.31         | 0.406535476  | 13  | <i>CLIP1, ZCCHC8</i>                               |
| VSCC8 | chr12:53,170,640-53,776,053   | CN Loss | 605414   | q13.13         | -0.501381457 | 25  |                                                    |
| VSCC8 | chr12:54,856,957-56,030,755   | CN Gain | 1173799  | q13.13 - q13.2 | 0.374799341  | 26  |                                                    |
| VSCC8 | chr12:57,571,284-57,627,534   | CN Loss | 56251    | q13.3          | -0.309981883 | 4   |                                                    |
| VSCC8 | chr12:80,613,528-81,067,821   | CN Gain | 454294   | q21.31         | 0.42046538   | 2   |                                                    |
| VSCC8 | chr12:9,640,558-11,286,095    | CN Gain | 1645538  | p13.31 - p13.2 | 0.416156679  | 52  |                                                    |
| VSCC8 | chr12:97,337,343-100,594,580  | CN Loss | 3257238  | q23.1          | -0.326734424 | 22  |                                                    |
| VSCC8 | chr13:103,249,349-103,540,938 | CN Gain | 291590   | q33.1          | 0.552395642  | 9   | <i>ERCC5</i>                                       |
| VSCC8 | chr13:17,900,000-32,313,701   | CN Loss | 14413702 | q11 - q13.1    | -0.3355878   | 122 | <i>ZNF198, CDX2, FLT3</i>                          |
| VSCC8 | chr13:53,313,807-60,086,263   | CN Loss | 6772457  | q14.3 - q21.2  | -0.574762225 | 37  |                                                    |
| VSCC8 | chr13:66,164,988-80,372,830   | CN Gain | 14207843 | q21.32 - q31.1 | 0.335808218  | 59  |                                                    |
| VSCC8 | chr14:20,201,981-23,012,133   | CN Gain | 2810153  | q11.2          | 0.477636471  | 73  | <i>CCNB1IP1</i>                                    |
| VSCC8 | chr14:24,004,218-30,862,866   | CN Loss | 6858649  | q11.2 - q12    | -0.526525199 | 64  |                                                    |
| VSCC8 | chr14:44,974,991-64,990,243   | CN Gain | 20015253 | q21.2 - q23.3  | 0.324101686  | 152 | <i>NIN, KTN1</i>                                   |
| VSCC8 | chr14:74,976,489-75,329,760   | CN Gain | 353272   | q24.3          | 0.620976448  | 5   |                                                    |
| VSCC8 | chr15:0-19,000,000            | CN Loss | 19000001 | p13 - q11.1    | -2.035624027 | 0   |                                                    |
| VSCC8 | chr15:36,374,398-38,067,701   | CN Loss | 1693304  | q14            | -1.377360463 | 5   |                                                    |
| VSCC8 | chr15:38,067,701-42,445,793   | CN Loss | 4378093  | q14 - q15.1    | -0.484723881 | 74  | <i>BUB1B, AF15Q14</i>                              |
| VSCC8 | chr15:56,996,906-102,531,392  | CN Loss | 45534487 | q21.3 - q26.3  | -0.424666196 | 519 | <i>TCF12, MAP2K1, PML, NTRK3, IDH2, CRTCS, BLM</i> |

|       |                              |         |          |                 |              |     |                                              |
|-------|------------------------------|---------|----------|-----------------|--------------|-----|----------------------------------------------|
| VSCC8 | chr16:18,765,600-22,167,233  | CN Gain | 3401634  | p12.3 - p12.2   | 0.307654679  | 53  |                                              |
| VSCC8 | chr16:3,843,491-3,900,941    | CN Loss | 57451    | p13.3           | -3.30294776  | 1   | <i>CREBBP</i>                                |
| VSCC8 | chr16:36,600,000-46,509,789  | CN Loss | 9909790  | q11.1 - q11.2   | -1.317151845 | 1   |                                              |
| VSCC8 | chr16:53,171,032-53,982,423  | CN Gain | 811392   | q12.2           | 0.368092552  | 7   |                                              |
| VSCC8 | chr16:79,058,359-81,508,489  | CN Gain | 2450131  | q23.1 - q23.2   | 0.4999585    | 19  | <i>MAF</i>                                   |
| VSCC8 | chr16:88,065,470-89,261,528  | CN Loss | 1196059  | q24.2 - q24.3   | -0.346934885 | 30  | <i>CBFA2T3</i>                               |
| VSCC8 | chr17:0-10,216,061           | CN Loss | 10216062 | p13.3 - p13.1   | -0.553010285 | 282 | <i>YWHAE, USP6, RAB5EP, TP53, PER1, GAS7</i> |
| VSCC8 | chr17:10,447,257-24,000,000  | CN Loss | 13552744 | p13.1 - q11.1   | -0.52374199  | 163 | <i>MAP2K4, NCOR1, BHD, HCMOGT-1</i>          |
| VSCC8 | chr17:28,268,703-29,750,932  | CN Gain | 1482230  | q11.2           | 0.361915648  | 25  | <i>NF1</i>                                   |
| VSCC8 | chr17:33,585,829-34,036,298  | CN Gain | 450470   | q12             | 0.395623505  | 11  |                                              |
| VSCC8 | chr17:35,311,271-36,093,719  | CN Gain | 782449   | q12             | 0.307636544  | 11  |                                              |
| VSCC8 | chr17:38,786,307-39,183,368  | CN Gain | 397062   | q21.2           | 0.365907282  | 18  | <i>SMARCE1</i>                               |
| VSCC8 | chr17:68,172,311-78,268,551  | CN Loss | 10096241 | q24.3 - q25.3   | -0.515944779 | 183 | <i>H3F3B, SRSF2, MSF, CANTI</i>              |
| VSCC8 | chr17:78,393,377-81,195,210  | CN Loss | 2801834  | q25.3           | -0.651071668 | 87  | <i>ASPSCRI</i>                               |
| VSCC8 | chr18:0-7,045,758            | CN Gain | 7045759  | p11.32 - p11.31 | 0.369873434  | 52  |                                              |
| VSCC8 | chr18:28,563,813-29,497,541  | CN Gain | 933729   | q12.1           | 0.638754547  | 14  |                                              |
| VSCC8 | chr18:51,888,294-61,169,576  | CN Loss | 9281283  | q21.2 - q21.33  | -0.392397404 | 50  | <i>MALT1, BCL2, FVT1</i>                     |
| VSCC8 | chr18:61,169,576-61,674,854  | CN Gain | 505279   | q21.33 - q22.1  | 0.561304033  | 11  |                                              |
| VSCC8 | chr19:14,006,262-14,705,174  | CN Loss | 698913   | p13.12          | -0.718951911 | 28  |                                              |
| VSCC8 | chr19:15,220,030-25,428,145  | CN Loss | 10208116 | p13.12 - p11    | -0.651071668 | 196 | <i>BRD4, TPM4, JAK3, ELL, CRTCI</i>          |
| VSCC8 | chr19:36,831,440-38,405,258  | CN Gain | 1573819  | q13.12 - q13.13 | 0.358441174  | 42  |                                              |
| VSCC8 | chr19:4,231,114-4,254,365    | CN Loss | 23252    | p13.3           | -3.325130463 | 2   |                                              |
| VSCC8 | chr19:44,306,440-45,209,131  | CN Gain | 902692   | q13.31 - q13.32 | 0.444170967  | 31  |                                              |
| VSCC8 | chr19:56,206,451-58,496,429  | CN Gain | 2289979  | q13.42 - q13.43 | 0.304549903  | 75  |                                              |
| VSCC8 | chr19:9,046,043-9,088,901    | CN Gain | 42859    | p13.2           | 0.551521778  | 1   |                                              |
| VSCC8 | chr2:140,992,438-141,986,710 | CN Gain | 994273   | q22.1           | 0.507871807  | 2   |                                              |
| VSCC8 | chr2:152,289,610-152,732,880 | CN Gain | 443271   | q23.3           | 0.447928071  | 4   |                                              |
| VSCC8 | chr2:160,087,109-171,260,754 | CN Gain | 11173646 | q24.2 - q31.1   | 0.441346854  | 75  |                                              |
| VSCC8 | chr2:178,326,688-201,357,873 | CN Gain | 23031186 | q31.2 - q33.1   | 0.45120737   | 121 | <i>PMS1, SF3B1</i>                           |

|       |                              |         |          |                |              |     |                                                                                                           |
|-------|------------------------------|---------|----------|----------------|--------------|-----|-----------------------------------------------------------------------------------------------------------|
| VSCC8 | chr2:202,625,760-203,620,248 | CN Loss | 994489   | q33.1 - q33.2  | -0.373211235 | 13  |                                                                                                           |
| VSCC8 | chr2:21,224,889-21,365,890   | CN Gain | 141002   | p24.1          | 0.623835295  | 2   |                                                                                                           |
| VSCC8 | chr2:216,292,957-222,298,767 | CN Loss | 6005811  | q35 - q36.1    | -0.527425855 | 96  | <i>FEV</i>                                                                                                |
| VSCC8 | chr2:232,209,773-243,199,373 | CN Loss | 10989601 | q37.1 - q37.3  | -0.562427342 | 150 |                                                                                                           |
| VSCC8 | chr2:3,698,900-3,699,006     | CN Loss | 107      | p25.3          | -3.32851541  | 0   |                                                                                                           |
| VSCC8 | chr2:61,410,686-61,632,923   | CN Gain | 222238   | p15            | 0.525976598  | 2   |                                                                                                           |
| VSCC8 | chr2:73,585,122-74,160,637   | CN Gain | 575516   | p13.1          | 0.32787545   | 11  |                                                                                                           |
| VSCC8 | chr2:84,650,713-85,032,837   | CN Gain | 382125   | p11.2          | 0.438044935  | 2   |                                                                                                           |
| VSCC8 | chr20:0-5,897,515            | CN Loss | 5897516  | p13 - p12.3    | -0.406325325 | 114 |                                                                                                           |
| VSCC8 | chr21:30,299,964-32,007,640  | CN Gain | 1707677  | q21.3 - q22.11 | 0.455412582  | 40  |                                                                                                           |
| VSCC8 | chr21:5,305-14,415,141       | CN Loss | 14409837 | p13 - q11.2    | -0.839703679 | 12  |                                                                                                           |
| VSCC8 | chr22:19,504,400-21,080,676  | CN Loss | 1576277  | q11.21         | -0.358371943 | 42  | <i>PNUTL1</i>                                                                                             |
| VSCC8 | chr22:21,304,090-22,012,006  | CN Loss | 707917   | q11.21         | -0.383224308 | 31  |                                                                                                           |
| VSCC8 | chr22:37,407,228-38,229,133  | CN Loss | 821906   | q12.3 - q13.1  | -0.367014408 | 26  |                                                                                                           |
| VSCC8 | chr22:50,605,404-51,304,566  | CN Loss | 699163   | q13.33         | -0.443683416 | 31  |                                                                                                           |
| VSCC8 | chr3:0-50,816,138            | CN Loss | 50816139 | p26.3 - p21.2  | -0.432415694 | 481 | <i>SRGAP3, FANCD2, VHL, PPARG, RAF1, XPC, MLH1, MYD88, CTNNB1, SETD2, AF3p21, RHOA</i>                    |
| VSCC8 | chr3:130,095,122-194,387,183 | CN Gain | 64292062 | q22.1 - q29    | 0.538147181  | 461 | <i>FOXL2, ATR, WWTR1, GMPS, MLF1, EVI1, MDS1, TBL1XR1, PIK3CA, SOX2, MAP3K13, ETV5, EIF4A2, BCL6, LPP</i> |
| VSCC8 | chr3:195,753,929-198,022,430 | CN Gain | 2268502  | q29            | 0.466567814  | 43  | <i>TFRC</i>                                                                                               |
| VSCC8 | chr3:51,497,186-55,989,124   | CN Loss | 4491939  | p21.2 - p14.3  | -0.513659567 | 79  | <i>BAP1, PBRM1, CACNA1D</i>                                                                               |
| VSCC8 | chr3:57,494,886-91,000,000   | CN Loss | 33505115 | p14.3 - q11.1  | -0.401241913 | 117 | <i>FHIT, MITF, FOXP1</i>                                                                                  |
| VSCC8 | chr3:91,000,000-125,336,802  | CN Gain | 34336803 | q11.1 - q21.2  | 0.58730644   | 227 | <i>TFG, CBLB</i>                                                                                          |
| VSCC8 | chr4:35,845,882-49,094,779   | CN Gain | 13248898 | p14 - p11      | 0.357942045  | 84  | <i>ARHH, PHOX2B</i>                                                                                       |
| VSCC8 | chr4:50,400,000-57,897,321   | CN Gain | 7497322  | q11 - q12      | 0.324610397  | 48  | <i>FIP1L1, CHIC2, PDGFRA, KIT, KDR</i>                                                                    |
| VSCC8 | chr4:600,134-26,959,308      | CN Loss | 26359175 | p16.3 - p15.2  | -0.475353628 | 278 | <i>FGFR3, WHSC1, SLC34A2</i>                                                                              |

|       |                              |         |          |                |              |     |                                                                          |
|-------|------------------------------|---------|----------|----------------|--------------|-----|--------------------------------------------------------------------------|
| VSCC8 | chr4:62,383,038-130,057,086  | CN Gain | 67674049 | q13.1 - q28.2  | 0.304549813  | 396 | <i>MLLT2, RAP1GDS1, TET2, IL2</i>                                        |
| VSCC8 | chr5:0-48,400,000            | CN Gain | 48400001 | p15.33 - q11.1 | 0.617644608  | 246 | <i>TERT, IL7R, LIFR</i>                                                  |
| VSCC8 | chr5:138,713,216-139,819,690 | CN Loss | 1106475  | q31.2 - q31.3  | -0.507292002 | 22  |                                                                          |
| VSCC8 | chr5:139,819,690-140,980,944 | CN Gain | 1161255  | q31.3          | 0.310752809  | 82  |                                                                          |
| VSCC8 | chr5:146,963,895-148,619,279 | CN Gain | 1655385  | q32            | 0.468104184  | 18  |                                                                          |
| VSCC8 | chr5:159,781,989-161,711,935 | CN Gain | 1929947  | q33.3 - q34    | 0.414682373  | 14  |                                                                          |
| VSCC8 | chr5:68,830,607-70,759,851   | CN Loss | 1929245  | q13.2          | -0.641563058 | 29  |                                                                          |
| VSCC8 | chr5:90,427,364-93,727,284   | CN Loss | 3299921  | q14.3 - q15    | -0.452449441 | 10  |                                                                          |
| VSCC8 | chr6:116,720,369-117,900,178 | CN Gain | 1179810  | q22.1          | 0.391494632  | 16  | <i>ROS1, GOPC</i>                                                        |
| VSCC8 | chr6:25,426,674-25,862,133   | CN Gain | 435460   | p22.2          | 0.39587225   | 8   |                                                                          |
| VSCC8 | chr6:28,614,497-33,541,701   | CN Loss | 4927205  | p22.1 - p21.31 | -0.526043236 | 248 | <i>TRIM27, HLA-A, POU5F1, DAXX</i>                                       |
| VSCC8 | chr6:34,855,660-38,472,336   | CN Loss | 3616677  | p21.31 - p21.2 | -0.498666793 | 55  | <i>FANCE, SFRS3, PIMI</i>                                                |
| VSCC8 | chr6:39,024,106-45,977,288   | CN Loss | 6953183  | p21.2 - p21.1  | -0.489655554 | 112 | <i>TFEB, CCND3, HSPCB, NFKBIE</i>                                        |
| VSCC8 | chr6:50,504,412-55,439,836   | CN Gain | 4935425  | p12.3 - p12.1  | 1.320263743  | 41  |                                                                          |
| VSCC8 | chr6:55,439,836-61,000,000   | CN Gain | 5560165  | p12.1 - q11.1  | 0.790145487  | 17  |                                                                          |
| VSCC8 | chr7:100,646,273-100,704,976 | CN Gain | 58704    | q22.1          | 0.338334128  | 3   |                                                                          |
| VSCC8 | chr7:102,398,457-124,597,494 | CN Gain | 22199038 | q22.1 - q31.33 | 0.355943859  | 125 | <i>MET, POT1</i>                                                         |
| VSCC8 | chr7:141,420,398-142,494,439 | CN Gain | 1074042  | q34            | 0.415197432  | 18  |                                                                          |
| VSCC8 | chr7:76,694,246-95,844,906   | CN Gain | 19150661 | q11.23 - q21.3 | 0.383914784  | 99  | <i>AKAP9, CDK6</i>                                                       |
| VSCC8 | chr7:99,077,418-99,514,371   | CN Gain | 436954   | q22.1          | 0.363406062  | 14  |                                                                          |
| VSCC8 | chr8:145,907,841-146,364,022 | CN Gain | 456182   | q24.3          | 0.467693657  | 14  |                                                                          |
| VSCC8 | chr8:20,107,382-23,282,272   | CN Loss | 3174891  | p21.3          | -0.301283777 | 47  |                                                                          |
| VSCC8 | chr8:30,652,291-31,078,635   | CN Gain | 426345   | p12            | 0.302303836  | 4   | <i>WRN</i>                                                               |
| VSCC8 | chr8:45,600,000-86,517,166   | CN Gain | 40917167 | q11.1 - q21.2  | 0.72952503   | 199 | <i>TCEA1, PLAG1, CHCHD7, NCOA2, HEY1</i>                                 |
| VSCC8 | chr8:7,000,720-8,865,569     | CN Loss | 1864850  | p23.1          | -0.500475824 | 51  |                                                                          |
| VSCC8 | chr8:87,007,082-142,200,349  | CN Gain | 55193268 | q21.3 - q24.3  | 0.678871185  | 290 | <i>NBS1, CBFA2T1, COX6C, UBR5, RSPO2, EIF3E, RAD21, EXT1, MYC, NDRG1</i> |



|        |                              |         |          |                 |              |     |                                                           |
|--------|------------------------------|---------|----------|-----------------|--------------|-----|-----------------------------------------------------------|
| VSCC8  | chr9:123,687,500-123,928,477 | CN Gain | 240978   | q33.2           | 0.448625922  | 3   | <i>CEP1</i>                                               |
| VSCC8  | chr9:125,239,518-125,932,237 | CN Gain | 692720   | q33.2 - q33.3   | 0.369333297  | 24  |                                                           |
| VSCC8  | chr9:127,064,106-130,475,149 | CN Gain | 3411044  | q33.3 - q34.11  | 0.503139973  | 40  | <i>PPP6C</i>                                              |
| VSCC8  | chr9:130,891,001-136,291,256 | CN Gain | 5400256  | q34.11 - q34.2  | 0.407982662  | 119 | <i>SET, ABL1, NUP214, TSC1, RALGDS</i>                    |
| VSCC8  | chr9:37,861,428-47,341,644   | CN Loss | 9480217  | p13.2 - p11.1   | -0.509555101 | 65  |                                                           |
| VSCC8  | chr9:49,000,000-71,088,254   | CN Loss | 22088255 | q11 - q21.11    | -0.437605262 | 50  |                                                           |
| VSCC8  | chr9:8,565,392-12,694,113    | CN Loss | 4128722  | p24.1 - p23     | -0.504570469 | 5   |                                                           |
| VSCC8  | chr9:94,789,209-95,618,553   | CN Gain | 829345   | q22.31          | 0.317173883  | 19  | <i>OMD</i>                                                |
| VSCC8  | chrX:0-2,636,390             | CN Loss | 2636391  | p22.33          | -1.073499501 | 22  |                                                           |
| VSCC8  | chrX:152,612,516-153,880,363 | CN Loss | 1267848  | q28             | -0.425954953 | 69  | <i>ATP2B3, RPL10</i>                                      |
| VSCC8  | chrX:2,636,390-10,102,495    | CN Loss | 7466106  | p22.33 - p22.2  | -0.370728344 | 36  |                                                           |
| VSCC8  | chrX:46,971,210-49,368,283   | CN Loss | 2397074  | p11.23          | -0.416105196 | 128 | <i>SSX1, SSX4, WAS, GATA1, TFE3</i>                       |
| VSCC8  | chrX:60,600,000-69,295,996   | CN Loss | 8695997  | q11.1 - q13.1   | -0.326335996 | 29  | <i>AMER1, MSN</i>                                         |
| VSCC8  | chrX:86,924,259-99,663,523   | CN Loss | 12739265 | q21.31 - q22.1  | -0.406745285 | 16  |                                                           |
| VSCC10 | chr1:0-2,528,754             | CN Gain | 2528755  | p36.33 - p36.32 | 0.373355895  | 109 | <i>TNFRSF14</i>                                           |
| VSCC10 | chr1:101,756,411-107,600,216 | CN Loss | 5843806  | p21.2 - p13.3   | -0.382460415 | 21  |                                                           |
| VSCC10 | chr1:145,281,881-147,415,484 | CN Gain | 2133604  | q21.1 - q21.2   | 0.648811758  | 43  | <i>BCL9</i>                                               |
| VSCC10 | chr1:149,872,024-150,429,798 | CN Gain | 557775   | q21.2 - q21.3   | 0.698648691  | 17  |                                                           |
| VSCC10 | chr1:15,367,061-24,684,257   | CN Gain | 9317197  | p36.21 - p36.11 | 0.396006227  | 177 | <i>SPEN, SDHB, PAX7, MDS2</i>                             |
| VSCC10 | chr1:150,429,798-151,018,513 | CN Gain | 588716   | q21.3           | 1.062147081  | 21  | <i>ARNT</i>                                               |
| VSCC10 | chr1:151,018,513-151,316,295 | CN Gain | 297783   | q21.3           | 0.800396085  | 18  |                                                           |
| VSCC10 | chr1:151,316,295-152,384,653 | CN Gain | 1068359  | q21.3           | 1.107169807  | 32  |                                                           |
| VSCC10 | chr1:152,384,653-168,391,593 | CN Gain | 16006941 | q21.3 - q24.2   | 0.592698157  | 368 | <i>TPM3, LMNA, PRCC, NTRK1, IRTA1, SDHC, FCGR2B, PBX1</i> |
| VSCC10 | chr1:169,080,673-170,513,974 | CN Gain | 1433302  | q24.2           | 0.376719788  | 19  |                                                           |
| VSCC10 | chr1:171,729,789-176,564,427 | CN Gain | 4834639  | q24.3 - q25.2   | 0.354901046  | 51  |                                                           |
| VSCC10 | chr1:26,131,703-29,644,267   | CN Gain | 3512565  | p36.11 - p35.3  | 0.39083755   | 89  | <i>ARID1A</i>                                             |
| VSCC10 | chr1:3,315,523-3,826,981     | CN Gain | 511459   | p36.32          | 0.394162968  | 15  | <i>PRDM16</i>                                             |
| VSCC10 | chr1:31,188,683-35,321,536   | CN Gain | 4132854  | p35.2 - p34.3   | 0.399685651  | 75  | <i>LCK</i>                                                |

|        |                               |         |          |                 |              |     |                                                                                                                        |
|--------|-------------------------------|---------|----------|-----------------|--------------|-----|------------------------------------------------------------------------------------------------------------------------|
| VSCC10 | chr1:35,908,628-47,840,969    | CN Gain | 11932342 | p34.3 - p33     | 0.385653704  | 222 | <i>THRAP3, CSF3R, MYCL1, MPL, MUTYH, TAL1, SIL</i>                                                                     |
| VSCC10 | chr1:5,922,826-6,783,071      | CN Gain | 860246   | p36.31          | 0.417579919  | 23  | <i>RPL22</i>                                                                                                           |
| VSCC10 | chr1:51,735,626-55,595,098    | CN Gain | 3859473  | p32.3           | 0.337358147  | 65  | <i>EPS15</i>                                                                                                           |
| VSCC10 | chr1:7,697,520-13,002,249     | CN Gain | 5304730  | p36.23 - p36.21 | 0.378213257  | 101 | <i>CAMTA1</i>                                                                                                          |
| VSCC10 | chr10:129,988,880-133,747,983 | CN Loss | 3759104  | q26.2 - q26.3   | -0.376768038 | 12  |                                                                                                                        |
| VSCC10 | chr10:65,369,977-68,685,994   | CN Loss | 3316018  | q21.3           | -0.424115151 | 7   |                                                                                                                        |
| VSCC10 | chr10:8,115,985-11,207,215    | CN Loss | 3091231  | p14             | -0.455679476 | 12  | <i>GATA3</i>                                                                                                           |
| VSCC10 | chr11:36,659,471-43,421,530   | CN Loss | 6762060  | p12             | -0.451695979 | 11  |                                                                                                                        |
| VSCC10 | chr11:69,852,429-71,188,335   | CN Gain | 1335907  | q13.3 - q13.4   | 0.319981351  | 15  |                                                                                                                        |
| VSCC10 | chr11:79,004,863-135,006,516  | CN Loss | 56001654 | q14.1 - q25     | -0.483876377 | 478 | <i>PICALM, MAML2, BIRC3, ATM, DDX10, POU2AF1, SDHD, ZNF145, PAFAH1B2, PCSK7, MLL, DDX6, CBL, ARHGEF12, FLII, KCNJ5</i> |
| VSCC10 | chr12:126,138,627-129,153,909 | CN Loss | 3015283  | q24.32          | -0.32387282  | 21  |                                                                                                                        |
| VSCC10 | chr12:59,307,724-62,029,417   | CN Loss | 2721694  | q14.1           | -0.411899358 | 2   | <i>LRIG3</i>                                                                                                           |
| VSCC10 | chr13:27,914,044-31,631,980   | CN Gain | 3717937  | q12.2 - q12.3   | 0.656828463  | 38  | <i>CDX2, FLT3</i>                                                                                                      |
| VSCC10 | chr13:31,811,770-100,480,848  | CN Loss | 68669079 | q12.3 - q32.3   | -0.466356277 | 396 | <i>BRCA2, LHFP, FOXO1A, LCPI, RBI</i>                                                                                  |
| VSCC10 | chr14:22,386,737-23,018,568   | CN Gain | 631832   | q11.2           | 0.47695303   | 0   |                                                                                                                        |
| VSCC10 | chr14:25,102,202-29,236,999   | CN Loss | 4134798  | q12             | -0.437183142 | 11  |                                                                                                                        |
| VSCC10 | chr14:39,871,615-44,973,973   | CN Loss | 5102359  | q21.1 - q21.2   | -0.476464689 | 4   |                                                                                                                        |
| VSCC10 | chr14:45,716,415-50,044,609   | CN Loss | 4328195  | q21.2 - q21.3   | -0.405425981 | 7   |                                                                                                                        |
| VSCC10 | chr14:81,993,158-88,651,992   | CN Loss | 6658835  | q31.1 - q31.3   | -0.445081115 | 13  |                                                                                                                        |
| VSCC10 | chr14:97,022,581-99,865,100   | CN Loss | 2842520  | q32.2           | -0.33581081  | 9   | <i>BCL11B</i>                                                                                                          |
| VSCC10 | chr16:5,375,115-7,568,139     | CN Loss | 2193025  | p13.3           | -0.365559548 | 3   |                                                                                                                        |
| VSCC10 | chr16:58,753,200-66,416,177   | CN Loss | 7662978  | q21             | -0.428025499 | 10  | <i>CDH11</i>                                                                                                           |
| VSCC10 | chr16:70,885,796-71,218,800   | CN Gain | 333005   | q22.2           | 0.381565005  | 1   |                                                                                                                        |
| VSCC10 | chr17:12,920,325-15,138,624   | CN Loss | 2218300  | p12             | -0.354403272 | 12  |                                                                                                                        |
| VSCC10 | chr18:18,512,274-24,496,886   | CN Gain | 5984613  | q11.1 - q11.2   | 0.30358389   | 43  | <i>ZNF521, SS18</i>                                                                                                    |
| VSCC10 | chr18:28,576,952-29,206,224   | CN Gain | 629273   | q12.1           | 0.409938335  | 12  |                                                                                                                        |

|        |                              |         |          |                 |              |     |                                               |
|--------|------------------------------|---------|----------|-----------------|--------------|-----|-----------------------------------------------|
| VSCC10 | chr2:103,389,394-105,838,385 | CN Loss | 2448992  | q12.1           | -0.420866728 | 15  |                                               |
| VSCC10 | chr2:114,684,885-118,579,675 | CN Loss | 3894791  | q14.1           | -0.43849647  | 7   |                                               |
| VSCC10 | chr2:122,598,540-127,805,946 | CN Loss | 5207407  | q14.3           | -0.444464892 | 4   |                                               |
| VSCC10 | chr2:128,964,485-130,897,143 | CN Loss | 1932659  | q14.3 - q21.1   | -0.34764421  | 11  |                                               |
| VSCC10 | chr2:192,746,283-196,545,022 | CN Loss | 3798740  | q32.3           | -0.521702945 | 5   |                                               |
| VSCC10 | chr2:21,363,570-23,729,864   | CN Loss | 2366295  | p24.1           | -0.424115151 | 4   |                                               |
| VSCC10 | chr2:3,932,823-6,989,820     | CN Loss | 3056998  | p25.3 - p25.2   | -0.451725841 | 15  |                                               |
| VSCC10 | chr2:33,812,290-36,668,484   | CN Loss | 2856195  | p22.3 - p22.2   | -0.353257194 | 8   |                                               |
| VSCC10 | chr2:56,324,464-60,614,607   | CN Loss | 4290144  | p16.1           | -0.378663808 | 8   |                                               |
| VSCC10 | chr21:0-13,200,000           | CN Loss | 13200001 | p13 - q11.1     | -0.315157145 | 11  |                                               |
| VSCC10 | chr21:19,775,921-26,818,133  | CN Loss | 7042213  | q21.1 - q21.3   | -0.465017349 | 15  |                                               |
| VSCC10 | chr22:47,393,544-50,181,221  | CN Loss | 2787678  | q13.31 - q13.33 | -0.347483844 | 13  |                                               |
| VSCC10 | chr3:121,615,221-129,324,157 | CN Gain | 7708937  | q13.33 - q22.1  | 0.366227999  | 107 | <i>GATA2, RPN1, ZNF9</i>                      |
| VSCC10 | chr3:150,931,313-151,184,758 | CN Gain | 253446   | q25.1           | 0.375973642  | 6   |                                               |
| VSCC10 | chr3:182,923,848-198,022,430 | CN Gain | 15098583 | q27.1 - q29     | 0.374852464  | 200 | <i>MAP3K13, ETV5, EIF4A2, BCL6, LPP, TFRC</i> |
| VSCC10 | chr3:78,766,895-87,294,934   | CN Loss | 8528040  | p12.3 - p11.2   | -0.455679476 | 15  |                                               |
| VSCC10 | chr4:129,793,410-138,355,310 | CN Loss | 8561901  | q28.2 - q28.3   | -0.480494529 | 11  |                                               |
| VSCC10 | chr4:160,279,336-164,246,412 | CN Loss | 3967077  | q32.1 - q32.2   | -0.461008012 | 6   |                                               |
| VSCC10 | chr4:178,903,182-182,657,153 | CN Loss | 3753972  | q34.3           | -0.57664603  | 2   |                                               |
| VSCC10 | chr4:187,630,720-191,154,276 | CN Loss | 3523557  | q35.2           | -0.315161675 | 13  | <i>DUX4</i>                                   |
| VSCC10 | chr4:27,158,570-36,069,797   | CN Loss | 8911228  | p15.2 - p14     | -0.505735815 | 9   |                                               |
| VSCC10 | chr4:58,017,383-68,534,123   | CN Loss | 10516741 | q12 - q13.2     | -0.36112307  | 17  |                                               |
| VSCC10 | chr5:115,833,153-118,329,077 | CN Loss | 2495925  | q23.1           | -0.418274283 | 12  |                                               |
| VSCC10 | chr5:150,761,902-153,677,475 | CN Loss | 2915574  | q33.1 - q33.2   | -0.471725076 | 16  |                                               |
| VSCC10 | chr5:154,396,976-156,343,537 | CN Loss | 1946562  | q33.2 - q33.3   | -0.323254958 | 3   |                                               |
| VSCC10 | chr5:31,791,014-32,344,790   | CN Gain | 553777   | p13.3           | 0.324637741  | 4   |                                               |
| VSCC10 | chr5:82,948,601-89,692,301   | CN Loss | 6743701  | q14.3           | -0.375509143 | 22  |                                               |
| VSCC10 | chr6:112,750,465-116,277,726 | CN Loss | 3527262  | q21 - q22.1     | -0.350133121 | 9   |                                               |
| VSCC10 | chr6:139,699,131-142,376,118 | CN Loss | 2676988  | q24.1           | -0.489310265 | 6   |                                               |
| VSCC10 | chr6:161,587,243-165,683,968 | CN Loss | 4096726  | q26 - q27       | -0.324839681 | 12  |                                               |
| VSCC10 | chr6:57,061,712-61,000,000   | CN Loss | 3938289  | p11.2 - q11.1   | -0.35180673  | 7   |                                               |

|        |                               |         |          |                 |              |     |                                                                       |
|--------|-------------------------------|---------|----------|-----------------|--------------|-----|-----------------------------------------------------------------------|
| VSCC10 | chr6:64,776,188-70,639,487    | CN Loss | 5863300  | q12 - q13       | -0.357415453 | 9   |                                                                       |
| VSCC10 | chr7:116,436,110-128,482,247  | CN Loss | 12046138 | q31.2 - q32.1   | -0.496132165 | 78  | <i>MET, POT1, SND1</i>                                                |
| VSCC10 | chr7:128,620,009-159,138,663  | CN Loss | 30518655 | q32.1 - q36.3   | -0.471052498 | 302 | <i>SMO, CREB3L2, TIF1, KIAA1549, BRAF, FAM131B, EZH2, MLL3, HLXB9</i> |
| VSCC10 | chr7:51,327,316-54,537,517    | CN Loss | 3210202  | p12.1 - p11.2   | -0.418920934 | 5   |                                                                       |
| VSCC10 | chr7:66,785,310-70,016,975    | CN Loss | 3231666  | q11.21 - q11.22 | -0.32792519  | 5   |                                                                       |
| VSCC10 | chr8:110,993,973-116,426,596  | CN Loss | 5432624  | q23.2 - q23.3   | -0.359249711 | 5   |                                                                       |
| VSCC10 | chr8:13,425,048-16,822,563    | CN Loss | 3397516  | p22             | -0.323625803 | 7   |                                                                       |
| VSCC10 | chr8:3,363,759-6,269,592      | CN Loss | 2905834  | p23.2 - p23.1   | -0.43849647  | 3   |                                                                       |
| VSCC10 | chr9:104,449,253-107,266,689  | CN Loss | 2817437  | q31.1           | -0.374980226 | 9   |                                                                       |
| VSCC10 | chr9:22,490,487-26,892,673    | CN Loss | 4402187  | p21.3 - p21.2   | -0.456878424 | 8   |                                                                       |
| VSCC10 | chr9:28,024,292-32,408,588    | CN Loss | 4384297  | p21.1           | -0.536343813 | 6   |                                                                       |
| VSCC10 | chr9:8,771,303-12,584,997     | CN Loss | 3813695  | p24.1 - p23     | -0.539158821 | 4   |                                                                       |
| VSCC10 | chrX:2,772,073-3,248,262      | CN Gain | 476190   | p22.33          | 0.315707684  | 8   |                                                                       |
| VSCC11 | chr10:99,426,251-99,473,736   | CN Loss | 47486    | q24.2           | -1.548941076 | 3   |                                                                       |
| VSCC11 | chr11:56,756,994-59,855,654   | CN Gain | 3098661  | q12.1           | 0.400303394  | 71  | <i>HEAB</i>                                                           |
| VSCC11 | chr11:60,511,295-62,814,698   | CN Gain | 2303404  | q12.2 - q12.3   | 0.48749423   | 99  | <i>SDH5</i>                                                           |
| VSCC11 | chr11:63,531,077-76,944,148   | CN Gain | 13413072 | q13.1 - q13.5   | 0.541085452  | 330 | <i>MEN1, MALAT1, CCND1, NUMA1</i>                                     |
| VSCC11 | chr11:77,849,369-79,558,699   | CN Gain | 1709331  | q14.1           | 0.53633821   | 11  |                                                                       |
| VSCC11 | chr12:102,869,436-110,449,742 | CN Gain | 7580307  | q23.2 - q24.11  | 0.31833756   | 83  |                                                                       |
| VSCC11 | chr12:112,578,789-118,199,167 | CN Gain | 5620379  | q24.13 - q24.23 | 0.375006199  | 45  | <i>PTPN11, TBX3</i>                                                   |
| VSCC11 | chr12:120,112,178-122,701,019 | CN Gain | 2588842  | q24.23 - q24.31 | 0.409423172  | 57  | <i>TCF1, BCL7A</i>                                                    |
| VSCC11 | chr12:123,110,706-123,489,856 | CN Gain | 379151   | q24.31          | 0.540137291  | 12  |                                                                       |
| VSCC11 | chr12:124,413,964-133,438,098 | CN Gain | 9024135  | q24.31 - q24.33 | 0.434893489  | 73  | <i>POLE</i>                                                           |
| VSCC11 | chr12:6,923,838-7,083,764     | CN Gain | 159927   | p13.31          | 0.386130393  | 22  |                                                                       |
| VSCC11 | chr14:30,046,370-51,370,700   | CN Loss | 21324331 | q12 - q22.1     | -0.320721745 | 110 | <i>NKX2-1, FOXA1, NIN</i>                                             |
| VSCC11 | chr14:52,793,959-59,111,930   | CN Loss | 6317972  | q22.1 - q23.1   | -0.322014362 | 50  | <i>KTN1</i>                                                           |
| VSCC11 | chr14:88,951,380-89,360,972   | CN Loss | 409593   | q31.3           | -0.385909557 | 4   |                                                                       |
| VSCC11 | chr14:91,890,819-92,627,967   | CN Loss | 737149   | q32.11 - q32.12 | -0.441957369 | 8   | <i>TRIP11</i>                                                         |

|        |                              |         |          |                 |              |     |                        |
|--------|------------------------------|---------|----------|-----------------|--------------|-----|------------------------|
| VSCC11 | chr15:41,030,529-41,275,925  | CN Gain | 245397   | q15.1           | 0.424660087  | 13  |                        |
| VSCC11 | chr15:42,059,060-42,458,341  | CN Gain | 399282   | q15.1           | 0.479602545  | 15  |                        |
| VSCC11 | chr15:42,966,549-43,044,250  | CN Gain | 77702    | q15.2           | 0.348925874  | 3   |                        |
| VSCC11 | chr15:45,396,314-45,554,201  | CN Gain | 157888   | q21.1           | 0.339475334  | 7   |                        |
| VSCC11 | chr15:73,615,099-75,668,079  | CN Gain | 2052981  | q24.1 - q24.2   | 0.360039234  | 51  | <i>PML</i>             |
| VSCC11 | chr15:89,858,387-90,785,164  | CN Gain | 926778   | q26.1           | 0.358426392  | 26  | <i>IDH2</i>            |
| VSCC11 | chr15:91,376,291-91,512,587  | CN Gain | 136297   | q26.1           | 0.443038613  | 8   |                        |
| VSCC11 | chr16:1,812,629-2,288,318    | CN Gain | 475690   | p13.3           | 0.302208558  | 47  | <i>TSC2, TRAF7</i>     |
| VSCC11 | chr16:570,277-776,143        | CN Gain | 205867   | p13.3           | 0.372343302  | 24  |                        |
| VSCC11 | chr17:10,243,497-10,533,282  | CN Loss | 289786   | p13.1           | -0.368889034 | 7   |                        |
| VSCC11 | chr17:17,277,536-22,204,731  | CN Gain | 4927196  | p11.2 - p11.1   | 0.467683464  | 91  | <i>HCMOGT-1</i>        |
| VSCC11 | chr17:37,708,241-37,921,906  | CN Gain | 213666   | q12             | 0.363795549  | 11  | <i>ERBB2</i>           |
| VSCC11 | chr17:39,458,065-39,711,291  | CN Gain | 253227   | q21.2           | 0.399000928  | 18  |                        |
| VSCC11 | chr17:4,937,337-5,321,742    | CN Loss | 384406   | p13.2           | -0.394511715 | 10  | <i>USP6, RAB5EP</i>    |
| VSCC11 | chr17:48,046,898-48,773,377  | CN Gain | 726480   | q21.33          | 0.344365746  | 28  | <i>COL1A1</i>          |
| VSCC11 | chr17:73,481,632-73,922,769  | CN Gain | 441138   | q25.1           | 0.434893489  | 21  | <i>H3F3B</i>           |
| VSCC11 | chr17:79,009,082-80,403,812  | CN Gain | 1394731  | q25.3           | 0.398214906  | 68  | <i>ASPSCR1</i>         |
| VSCC11 | chr18:65,178,835-67,871,330  | CN Loss | 2692496  | q22.1 - q22.2   | -0.392231509 | 8   |                        |
| VSCC11 | chr19:11,725,564-12,757,338  | CN Loss | 1031775  | p13.2           | -0.449937567 | 30  |                        |
| VSCC11 | chr19:19,790,001-26,500,000  | CN Loss | 6710000  | p13.11 - q11    | -0.487635314 | 53  |                        |
| VSCC11 | chr19:36,673,350-38,383,324  | CN Loss | 1709975  | q13.12 - q13.13 | -0.496364266 | 45  |                        |
| VSCC11 | chr19:4,218,205-4,249,251    | CN Loss | 31047    | p13.3           | -1.386810899 | 3   |                        |
| VSCC11 | chr19:40,486,604-40,602,988  | CN Loss | 116385   | q13.2           | -0.493938252 | 4   |                        |
| VSCC11 | chr19:42,933,033-43,787,780  | CN Loss | 854748   | q13.2 - q13.31  | -0.344166607 | 17  |                        |
| VSCC11 | chr19:44,311,973-45,004,020  | CN Loss | 692048   | q13.31          | -0.415037513 | 24  |                        |
| VSCC11 | chr19:48,346,096-48,613,648  | CN Loss | 267553   | q13.33          | -0.40552488  | 36  |                        |
| VSCC11 | chr19:52,327,884-54,265,709  | CN Loss | 1937826  | q13.41 - q13.42 | -0.513982177 | 109 | <i>PPP2R1A, ZNF331</i> |
| VSCC11 | chr19:56,206,264-58,773,455  | CN Loss | 2567192  | q13.42 - q13.43 | -0.327628762 | 82  |                        |
| VSCC11 | chr19:6,760,752-7,504,484    | CN Loss | 743733   | p13.3 - p13.2   | -0.345918506 | 12  |                        |
| VSCC11 | chr19:9,296,740-9,921,942    | CN Loss | 625203   | p13.2           | -0.466517657 | 17  |                        |
| VSCC11 | chr2:108,624,919-109,513,263 | CN Loss | 888345   | q12.3           | -0.365331233 | 13  | <i>RANBP2</i>          |
| VSCC11 | chr2:135,738,410-159,201,743 | CN Loss | 23463334 | q21.3 - q24.1   | -0.301471338 | 74  | <i>ACVR1</i>           |

|        |                              |         |          |                 |              |     |                                   |
|--------|------------------------------|---------|----------|-----------------|--------------|-----|-----------------------------------|
| VSCC11 | chr2:165,935,987-168,115,658 | CN Loss | 2179672  | q24.3           | -0.379166991 | 14  |                                   |
| VSCC11 | chr2:170,099,419-171,034,678 | CN Loss | 935260   | q31.1           | -0.402677998 | 14  |                                   |
| VSCC11 | chr2:179,472,837-204,594,335 | CN Loss | 25121499 | q31.2 - q33.2   | -0.329360664 | 152 | <i>PMS1, SF3B1, CASP8</i>         |
| VSCC11 | chr2:219,294,583-219,498,830 | CN Loss | 204248   | q35             | -0.310422868 | 4   |                                   |
| VSCC11 | chr2:26,677,438-27,606,755   | CN Gain | 929318   | p23.3           | 0.314183533  | 34  |                                   |
| VSCC11 | chr2:3,660,866-3,726,133     | CN Loss | 65268    | p25.3           | -1.40144968  | 2   |                                   |
| VSCC11 | chr2:73,053,138-73,519,705   | CN Gain | 466568   | p13.2 - p13.1   | 0.37206763   | 11  |                                   |
| VSCC11 | chr2:74,641,646-74,786,198   | CN Gain | 144553   | p13.1           | 0.422156185  | 20  |                                   |
| VSCC11 | chr2:85,270,782-86,337,955   | CN Gain | 1067174  | p11.2           | 0.307790026  | 27  |                                   |
| VSCC11 | chr2:99,232,615-100,880,630  | CN Loss | 1648016  | q11.2           | -0.34723711  | 16  | <i>LAF4</i>                       |
| VSCC11 | chr20:21,367,600-25,288,845  | CN Gain | 3921246  | p11.22 - p11.21 | 0.314181849  | 43  |                                   |
| VSCC11 | chr20:256,628-3,835,158      | CN Gain | 3578531  | p13             | 0.318614095  | 84  |                                   |
| VSCC11 | chr20:44,437,348-45,005,288  | CN Gain | 567941   | q13.12          | 0.371003494  | 20  |                                   |
| VSCC11 | chr20:60,861,690-62,804,972  | CN Gain | 1943283  | q13.33          | 0.449113131  | 96  |                                   |
| VSCC11 | chr21:0-13,200,000           | CN Loss | 13200001 | p13 - q11.1     | -0.308304757 | 11  |                                   |
| VSCC11 | chr21:14,353,774-42,900,089  | CN Loss | 28546316 | q11.2 - q22.3   | -0.307859853 | 230 | <i>OLIG2, RUNX1, ERG, TMPRSS2</i> |
| VSCC11 | chr22:38,864,282-39,096,046  | CN Loss | 231765   | q13.1           | -0.343291461 | 8   |                                   |
| VSCC11 | chr22:41,078,120-41,572,274  | CN Loss | 494155   | q13.2           | -0.366828859 | 10  | <i>EP300</i>                      |
| VSCC11 | chr3:10,012,138-10,283,964   | CN Loss | 271827   | p25.3           | -0.352066994 | 9   | <i>FANCD2, VHL</i>                |
| VSCC11 | chr3:44,284,936-44,888,026   | CN Loss | 603091   | p21.31          | -0.360461727 | 15  |                                   |
| VSCC11 | chr3:49,949,001-50,191,322   | CN Loss | 242322   | p21.31          | -0.36710903  | 5   |                                   |
| VSCC11 | chr3:50,683,675-51,696,851   | CN Loss | 1013177  | p21.2           | -0.301896274 | 7   |                                   |
| VSCC11 | chr3:52,598,091-52,802,266   | CN Loss | 204176   | p21.1           | -0.352947757 | 10  | <i>PBRM1</i>                      |
| VSCC11 | chr4:187,584,554-189,660,328 | CN Loss | 2075775  | q35.2           | -0.328494459 | 7   |                                   |
| VSCC11 | chr4:515,553-1,843,368       | CN Gain | 1327816  | p16.3           | 0.362186909  | 32  | <i>FGFR3</i>                      |
| VSCC11 | chr5:13,721,225-13,913,884   | CN Loss | 192660   | p15.2           | -0.398128048 | 1   |                                   |
| VSCC11 | chr5:16,760,286-31,908,861   | CN Loss | 15148576 | p15.1 - p13.3   | -0.300197005 | 30  |                                   |
| VSCC11 | chr5:3,922,917-4,886,417     | CN Loss | 963501   | p15.33 - p15.32 | -0.303597569 | 1   |                                   |
| VSCC11 | chr5:34,065,542-50,128,478   | CN Loss | 16062937 | p13.2 - q11.1   | -0.336309254 | 88  | <i>IL7R, LIFR</i>                 |

|        |                              |         |           |                 |              |     |                                                                                                            |
|--------|------------------------------|---------|-----------|-----------------|--------------|-----|------------------------------------------------------------------------------------------------------------|
| VSCC11 | chr5:58,120,976-180,915,260  | CN Loss | 122794285 | q11.2 - q35.3   | -0.485702693 | 969 | <i>PIK3R1, APC, FACL6, AF5q31, GRAF, PDGFRB, CD74, ITK, EBF1, PWWP2A, RANBP17, TLX3, NPM1, FGFR4, NSD1</i> |
| VSCC11 | chr7:100,694,826-100,895,121 | CN Gain | 200296    | q22.1           | 0.347627729  | 12  |                                                                                                            |
| VSCC11 | chr7:127,222,156-128,595,416 | CN Gain | 1373261   | q32.1           | 0.334288001  | 28  | <i>SND1</i>                                                                                                |
| VSCC11 | chr7:142,020,701-142,609,843 | CN Gain | 589143    | q34             | 0.374207109  | 6   |                                                                                                            |
| VSCC11 | chr7:143,036,686-143,175,375 | CN Gain | 138690    | q34 - q35       | 0.402396619  | 9   | <i>FAM131B</i>                                                                                             |
| VSCC11 | chr7:148,761,980-150,163,957 | CN Gain | 1401978   | q36.1           | 0.376069337  | 25  |                                                                                                            |
| VSCC11 | chr7:150,644,933-150,939,946 | CN Gain | 295014    | q36.1           | 0.390345618  | 17  |                                                                                                            |
| VSCC11 | chr7:27,133,930-27,358,633   | CN Gain | 224704    | p15.2           | 0.457420334  | 21  | <i>HOXA9, HOXA11, HOXA13</i>                                                                               |
| VSCC11 | chr7:30,671,113-31,146,266   | CN Gain | 475154    | p14.3           | 0.30528143   | 8   |                                                                                                            |
| VSCC11 | chr7:5,256,327-5,692,158     | CN Gain | 435832    | p22.1           | 0.304000333  | 9   |                                                                                                            |
| VSCC11 | chr7:766,289-2,771,308       | CN Gain | 2005020   | p22.3           | 0.353285849  | 41  |                                                                                                            |
| VSCC11 | chr8:142,148,090-142,489,103 | CN Gain | 341014    | q24.3           | 0.422042713  | 7   |                                                                                                            |
| VSCC11 | chr8:144,332,297-145,773,652 | CN Gain | 1441356   | q24.3           | 0.487002254  | 84  | <i>RECQL4</i>                                                                                              |
| VSCC11 | chr9:12,770,320-14,740,092   | CN Gain | 1969773   | p23 - p22.3     | 3.289883375  | 10  | <i>NFIB</i>                                                                                                |
| VSCC11 | chr9:32,973,437-37,282,324   | CN Gain | 4308888   | p21.1 - p13.2   | 0.707847327  | 101 | <i>FANCG, PAX5</i>                                                                                         |
| VSCC11 | chrX:0-2,616,478             | CN Loss | 2616479   | p22.33          | -0.465565056 | 22  |                                                                                                            |
| VSCC11 | chrX:61,683,471-155,270,560  | CN Gain | 93587090  | q11.1 - q28     | 0.419513106  | 850 | <i>AMER1, MSN, FOXO4, MED12, NONO, ATRX, SEPT6, STAG2, ELF4, GPC3, PHF6, ATP2B3, RPL10, MTCPI</i>          |
| VSCC12 | chr12:0-6,666,392            | CN Gain | 6666393   | p13.33 - p13.31 | 0.340522289  | 81  | <i>KDM5A, ERC1, CCND2</i>                                                                                  |
| VSCC12 | chr15:90,018,284-102,531,392 | CN Loss | 12513109  | q26.1 - q26.3   | -0.385090649 | 120 | <i>IDH2, CRTC3, BLM</i>                                                                                    |
| VSCC12 | chr17:17,183,992-18,183,863  | CN Gain | 999872    | p11.2           | 0.326389655  | 23  |                                                                                                            |
| VSCC12 | chr17:25,877,628-26,219,451  | CN Gain | 341824    | q11.2           | 0.401532143  | 4   |                                                                                                            |
| VSCC12 | chr17:67,047,209-67,272,652  | CN Gain | 225444    | q24.2 - q24.3   | 0.35693942   | 7   |                                                                                                            |
| VSCC12 | chr2:183,129,087-210,418,522 | CN Loss | 27289436  | q32.1 - q34     | -0.428601593 | 179 | <i>PMS1, SF3B1, CASP8, CREB1, IDH1</i>                                                                     |

|        |                               |         |          |                |              |     |                                                                                              |
|--------|-------------------------------|---------|----------|----------------|--------------|-----|----------------------------------------------------------------------------------------------|
| VSCC12 | chr2:240,061,289-243,199,373  | CN Loss | 3138085  | q37.3          | -0.327878326 | 52  |                                                                                              |
| VSCC12 | chr3:36,484,857-39,238,722    | CN Gain | 2753866  | p22.3 - p22.2  | 0.321927413  | 33  | <i>MLH1, MYD88</i>                                                                           |
| VSCC12 | chr3:42,699,877-52,558,032    | CN Gain | 9858156  | p22.1 - p21.1  | 0.32945013   | 242 | <i>SETD2, AF3p21, RHOA, BAP1</i>                                                             |
| VSCC12 | chr3:8,485,460-14,974,704     | CN Gain | 6489245  | p26.1 - p25.1  | 0.320530802  | 90  | <i>SRGAP3, FANCD2, VHL, PPARG, RAF1, XPC</i>                                                 |
| VSCC12 | chr4:187,208,837-190,386,636  | CN Loss | 3177800  | q35.2          | -0.880767584 | 10  |                                                                                              |
| VSCC12 | chr7:0-5,715,711              | CN Gain | 5715712  | p22.3 - p22.1  | 0.408914357  | 75  | <i>CARD11</i>                                                                                |
| VSCC12 | chr7:100,823,775-159,138,663  | CN Loss | 58314889 | q22.1 - q36.3  | -0.410853744 | 496 | <i>CUX1, MET, POT1, SND1, SMO, CREB3L2, TIF1, KIAA1549, BRAF, FAM131B, EZH2, MLL3, HLXB9</i> |
| VSCC12 | chr7:16,131,179-48,567,889    | CN Gain | 32436711 | p21.2 - p12.3  | 0.315489352  | 268 | <i>HNRNPA2B1, HOXA9, HOXA11, HOXA13, JAZF1</i>                                               |
| VSCC12 | chr7:62,491,692-100,552,761   | CN Loss | 38061070 | q11.21 - q22.1 | -0.421102196 | 388 | <i>SBDS, ELN, HIP1, AKAP9, CDK6, TRRAP</i>                                                   |
| VSCC12 | chr8:0-948,015                | CN Loss | 948016   | p23.3          | -0.376906425 | 9   |                                                                                              |
| VSCC12 | chr8:10,677,787-43,528,212    | CN Loss | 32850426 | p23.1 - p11.1  | -0.407145023 | 286 | <i>PCM1, WRN, NRG1, WHSC1L1, FGFR1, RUNXBP2, HOOK3</i>                                       |
| VSCC12 | chr8:141,542,615-146,364,022  | CN Gain | 4821408  | q24.3          | 0.434200272  | 132 | <i>RECQL4</i>                                                                                |
| VSCC12 | chr8:2,048,668-9,898,501      | CN Loss | 7849834  | p23.3 - p23.1  | -0.403448462 | 92  |                                                                                              |
| VSCC12 | chr9:0-8,853,488              | CN Gain | 8853489  | p24.3 - p24.1  | 0.711036384  | 56  | <i>JAK2, CD274, CD273</i>                                                                    |
| VSCC12 | chrX:61,682,613-62,944,484    | CN Loss | 1261872  | q11.1          | -0.817867696 | 4   |                                                                                              |
| VSCC13 | chr12:107,771,002-110,341,830 | CN Loss | 2570829  | q23.3 - q24.11 | -0.403063297 | 38  |                                                                                              |
| VSCC13 | chr14:22,192,380-23,069,987   | CN Gain | 877608   | q11.2          | 0.33545205   | 2   |                                                                                              |
| VSCC13 | chr7:54,813,554-55,779,521    | CN Gain | 965968   | p11.2          | 0.410039425  | 8   | <i>EGFR</i>                                                                                  |
| VSCC13 | chr7:6,949,539-50,769,721     | CN Gain | 43820183 | p22.1 - p12.1  | 0.402844205  | 306 | <i>ETV1, HNRNPA2B1, HOXA9, HOXA11, HOXA13, JAZF1</i>                                         |
| VSCC14 | chr11:36,614,704-43,343,589   | CN Gain | 6728886  | p12            | 0.380456463  | 11  |                                                                                              |



|        |                              |         |          |               |              |    |
|--------|------------------------------|---------|----------|---------------|--------------|----|
| VSCC14 | chr13:79,191,202-95,095,722  | CN Gain | 15904521 | q31.1 - q32.1 | 0.308909148  | 54 |
| VSCC14 | chr16:58,633,214-64,896,175  | CN Gain | 6262962  | q21           | 0.303581849  | 8  |
| VSCC14 | chr17:80,193,987-80,844,431  | CN Loss | 650445   | q25.3         | -0.410498381 | 21 |
| VSCC14 | chr4:130,126,518-138,083,992 | CN Gain | 7957475  | q28.2 - q28.3 | 0.408628345  | 7  |
| VSCC14 | chr5:17,229,524-31,299,935   | CN Gain | 14070412 | p15.1 - p13.3 | 0.324880958  | 25 |

---

CN Gain: copy number gain, CN Loss: copy number loss

\* UCSC GRCh37/hg19

\*\* Cancer-related genes are extracted from Cancer Gene Census (<http://cancer.sanger.ac.uk/census>) and genes previously reported in vulvar SCCs.
